# Supplementary material for: siRNAs from miRNA sites mediate DNA methylation of target genes
Source: PubMed Central journal article supplement — Nucleic Acids Res. 2010 Jul 9;38(20):6883–94. doi: 10.1093/nar/gkq590 (PMC2978365; doi:10.1093/nar/gkq590), 2010-07-09
Supplement: supp_gkq590_SupplTotal.pdf [file supp_gkq590_SupplTotal.pdf]

## Supplementary Materials and Methods

### Northern blot analysis

Probes to detect the MIR2831 spanning region:

P2831LoopS:AATGTGTTTTGTA ACTAATGCAAATGTGC

P2831LoopAS:GCACATTTTGCATTAGTTACAAAACACATT

miR2831-3P detection:miR2831-3P:a+cgc+ttc+cct+tga+cca+atc+ca.

miR165-AS:GGGGGATGAAGCCTGGTCCGA

To detect up and downstream regions of the miRNA, probes were made from PCR fragments generated using primers,

MIR2831-5'cDNAF: GTTGAGAACTTATGCAAGTTTG and MIR2831-5'cDNAR: CCATACTTGAGCAAATACCAGA to obtain 100-bp amplicon encompassing the upstream region and primers MIR2831-3'cDNAF:AAGCGTACTTGTGCAAATGC and MIR2831-3'cDNAR:CCGTCAGTCTGTAATAGCTC to obtain 100-bp fragment covering downstream region and were used to label with alpha P-32 dCTP and random primer labeling kit (Stratagene).

### Bisulfite Sequence analysis of *cis* loci

Details on genomic DNA extraction and bisulfite sequencing were as described in the main paper. The following primers were used to amplify *cis* loci.

Bis-MIR2328F:GGATTTTTATGGCAAAGCTTCG

Bis-MIR2328R:CAACTTCCGATCCATTCAGAC

(13 clones from wild-type and 13 clones from *nrpd1-3* were analyzed)

Bis-MIR2883F:CTTTAGCCACTCCAAATCCA

Bis-MIR2883R:TCCAAATACAGAATCGTGGG

(15 clones from wild-type and 15 clones from *nrpd1-3* were analyzed)

Bis-MIR2831Fp-GAAATAAGACAATTTAGTTGAGAAA

Bis-MIR2831Rp-CCTCTTTAGTTACAAAACAAAACC

(15 clones from wild-type and 15 clones from *nrpd1-3* were analyzed)

Bis-MIR156a1Fp-AGATCTAACACAAAGCTTAAAAGATT

Bis-MIR156aRp- GATCGTATCTTCTTACCTTAATAT

(15 clones from wild-type and 15 clones from *nprdl-3* were analyzed)





Fig. S2

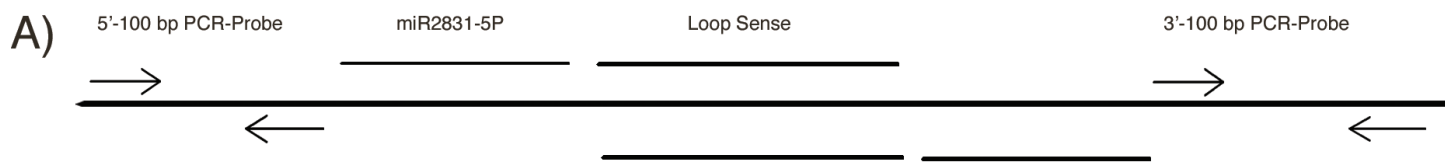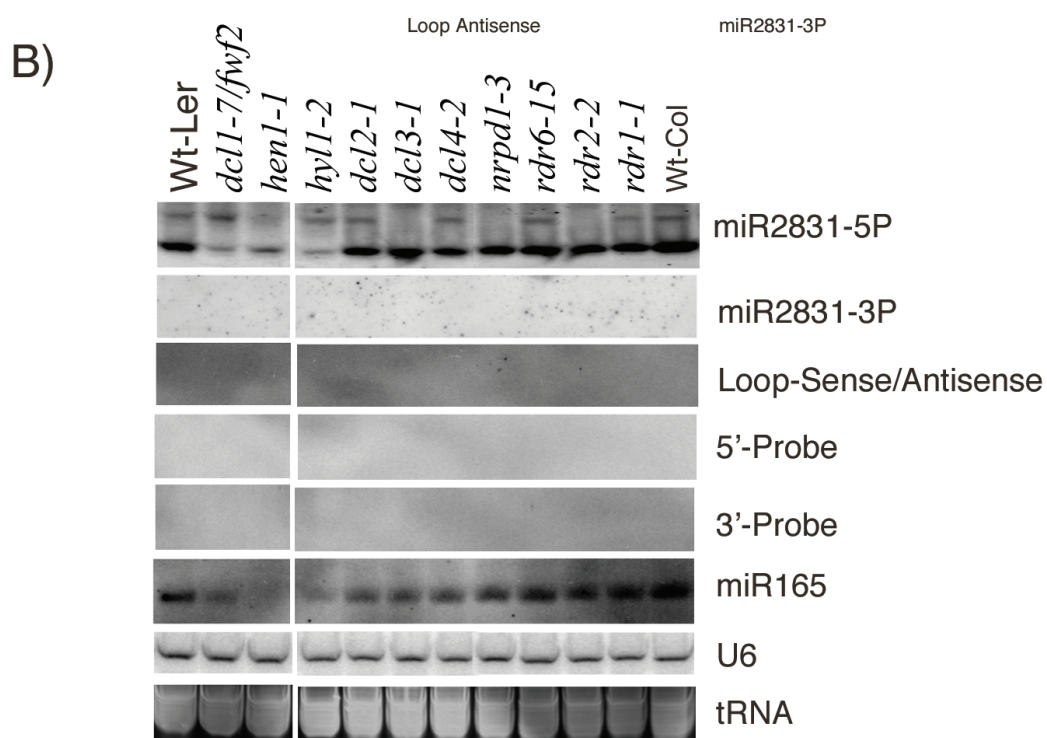

Fig. S3

A) Long siRNA cloning by 5' adapter-mediated ligation

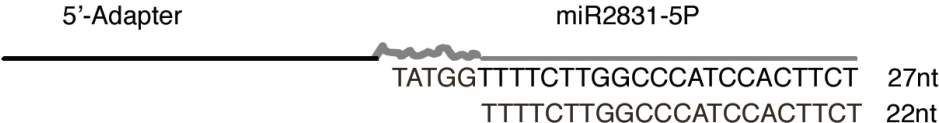

B) Long siRNA cloning by 3' adapter-mediated ligation

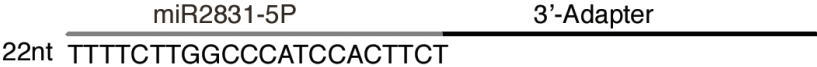

Fig. S4

A) **MIR2883-gene**

|                |      |     |     |     |     |     |     |     |     |     |     |     |     |     |     |     |
|----------------|------|-----|-----|-----|-----|-----|-----|-----|-----|-----|-----|-----|-----|-----|-----|-----|
| Position       | -100 | -96 | -90 | -87 | -82 | -76 | -73 | -70 | -67 | -64 | -55 | -52 | -48 | -39 | -31 | -27 |
| Types          | CG   | CHH | CHG | CHH | CHH | CHH | CHH | CG  | CHH |
| Wt             | 40   | 20  | 20  | 0   | 33  | 0   | 73  | 20  | 0   | 0   | 73  | 0   | 47  | 13  | 0   | 0   |
| <i>nrpd1-3</i> | 33   | 13  | 20  | 0   | 33  | 0   | 80  | 20  | 0   | 0   | 80  | 0   | 47  | 20  | 0   | 0   |

  

|                |     |     |    |            |            |           |     |     |     |     |     |     |     |     |     |     |
|----------------|-----|-----|----|------------|------------|-----------|-----|-----|-----|-----|-----|-----|-----|-----|-----|-----|
| Position       | -24 | -20 | -2 | <b>3</b>   | <b>14</b>  | <b>17</b> | 4   | 12  | 17  | 29  | 32  | 36  | 43  | 48  | 54  | 60  |
| Types          | CG  | CHH | CG | <b>CHH</b> | <b>CHH</b> | <b>CG</b> | CHG | CHH | CHH | CHH | CHH | CHH | CHH | CHG | CHH | CHH |
| Wt             | 0   | 0   | 0  | <b>0</b>   | <b>73</b>  | <b>0</b>  | 7   | 73  | 80  | 0   | 33  | 40  | 40  | 0   | 0   | 0   |
| <i>nrpd1-3</i> | 0   | 0   | 0  | <b>0</b>   | <b>80</b>  | <b>0</b>  | 0   | 80  | 80  | 0   | 33  | 33  | 33  | 0   | 0   | 0   |

  

|                |     |    |     |     |
|----------------|-----|----|-----|-----|
| Position       | 63  | 77 | 82  | 85  |
| Types          | CHG | CG | CHH | CHH |
| Wt             | 0   | 20 | 20  | 47  |
| <i>nrpd1-3</i> | 0   | 20 | 20  | 33  |

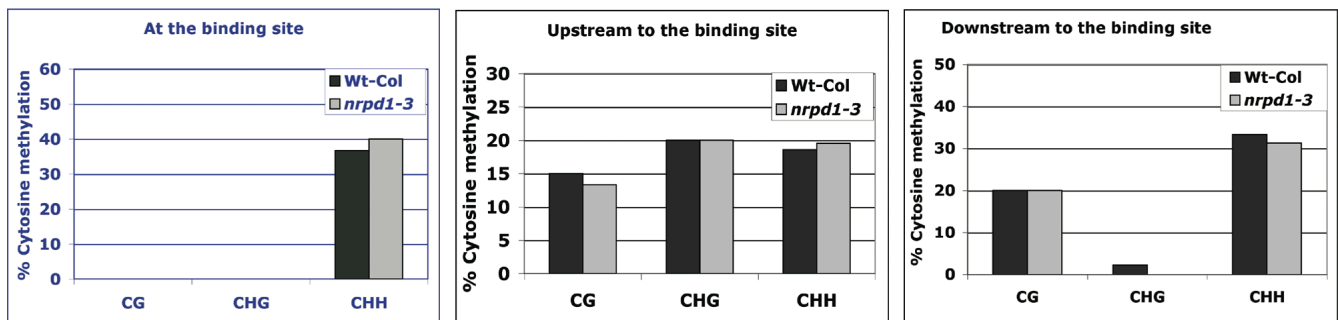

**B) MIR2328-gene**

**Target Site**

|                |     |     |     |     |     |     |     |     |     |     |     |     |            |           |            |           |
|----------------|-----|-----|-----|-----|-----|-----|-----|-----|-----|-----|-----|-----|------------|-----------|------------|-----------|
| Position       | -81 | -76 | -61 | -57 | -47 | -36 | -33 | -30 | -26 | -20 | -18 | -6  | <b>6</b>   | <b>14</b> | <b>17</b>  | <b>19</b> |
| Types          | CG  | CHH | CHH | CHH | CHG | CHH | CHH | CHG | CG  | CHH | CHH | CHH | <b>CHH</b> | <b>CG</b> | <b>CHH</b> | <b>CG</b> |
| Wt             | 0   | 0   | 0   | 8   | 0   | 8   | 0   | 0   | 0   | 0   | 8   | 0   | <b>0</b>   | <b>0</b>  | <b>0</b>   | <b>0</b>  |
| <i>nRPD1-3</i> | 0   | 0   | 0   | 0   | 18  | 9   | 9   | 18  | 9   | 9   | 0   | 0   | <b>9</b>   | <b>18</b> | <b>0</b>   | <b>9</b>  |

|                |     |     |     |     |     |    |    |     |     |     |     |     |    |    |     |     |
|----------------|-----|-----|-----|-----|-----|----|----|-----|-----|-----|-----|-----|----|----|-----|-----|
| Position       | 2   | 5   | 13  | 18  | 24  | 35 | 41 | 44  | 51  | 54  | 57  | 67  | 73 | 77 | 95  | 98  |
| Types          | CHH | CHH | CHH | CHH | CHH | CG | CG | CHH | CHH | CHH | CHH | CHH | CG | CG | CHG | CHH |
| Wt             | 0   | 0   | 0   | 0   | 0   | 0  | 0  | 0   | 0   | 0   | 0   | 0   | 0  | 0  | 0   | 0   |
| <i>nRPD1-3</i> | 0   | 9   | 0   | 9   | 0   | 9  | 18 | 0   | 0   | 0   | 9   | 9   | 9  | 9  | 18  | 0   |



### C) MIR2831-gene

#### Target Site

|                |     |     |     |     |     |     |     |     |     |     |     |     |            |            |
|----------------|-----|-----|-----|-----|-----|-----|-----|-----|-----|-----|-----|-----|------------|------------|
| Position       | -91 | -85 | -68 | -64 | -61 | -52 | -48 | -43 | -28 | -22 | -11 | -9  | <b>5</b>   | <b>10</b>  |
| Types          | CHH | CHG | CHG | CHH | CHH | <b>CHH</b> | <b>CHH</b> |
| Wt             | 0   | 0   | 60  | 60  | 60  | 0   | 60  | 67  | 13  | 0   | 60  | 67  | <b>67</b>  | <b>60</b>  |
| <i>nrpd1-3</i> | 13  | 13  | 53  | 60  | 60  | 20  | 60  | 60  | 13  | 33  | 47  | 53  | <b>60</b>  | <b>53</b>  |

  

|                |            |            |            |     |     |     |     |    |     |     |    |     |     |     |     |
|----------------|------------|------------|------------|-----|-----|-----|-----|----|-----|-----|----|-----|-----|-----|-----|
| Position       | <b>12</b>  | <b>15</b>  | <b>18</b>  | 15  | 21  | 30  | 48  | 57 | 61  | 67  | 74 | 77  | 81  | 87  | 92  |
| Types          | <b>CHH</b> | <b>CHH</b> | <b>CHH</b> | CHH | CHH | CHH | CHH | CG | CHH | CHH | CG | CHG | CHH | CHH | CHH |
| Wt             | <b>0</b>   | <b>60</b>  | <b>60</b>  | 0   | 0   | 60  | 60  | 67 | 67  | 0   | 60 | 0   | 60  | 60  | 60  |
| <i>nrpd1-3</i> | <b>13</b>  | <b>53</b>  | <b>53</b>  | 13  | 13  | 47  | 53  | 80 | 53  | 0   | 80 | 0   | 47  | 53  | 53  |

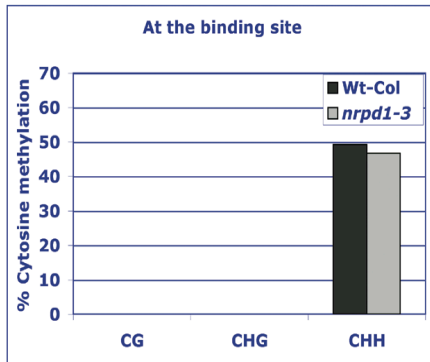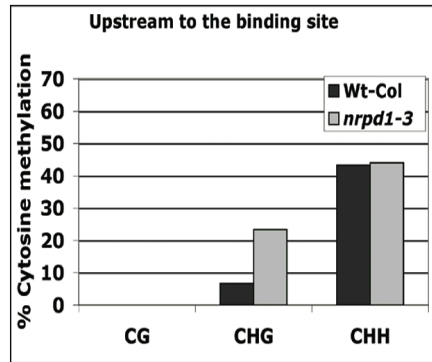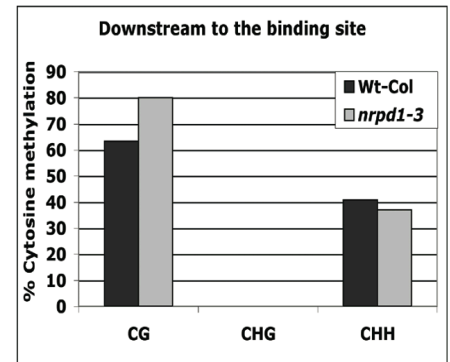

## D) MIR156a-gene

### Target Site

|                |     |     |     |     |     |     |     |     |     |     |     |     |     |            |            |
|----------------|-----|-----|-----|-----|-----|-----|-----|-----|-----|-----|-----|-----|-----|------------|------------|
| Position       | -96 | -94 | -91 | -86 | -78 | -70 | -67 | -58 | -56 | -45 | -20 | -11 | -9  | <b>4</b>   | <b>18</b>  |
| Types          | CHH | CHH | CG  | CHH | CHH | CHH | CHH | CHH | CHG | CHH | CHH | CG  | CHH | <b>CHG</b> | <b>CHH</b> |
| Wt             | 53  | 40  | 73  | 53  | 0   | 7   | 0   | 13  | 0   | 0   | 33  | 0   | 80  | <b>33</b>  | <b>40</b>  |
| <i>nrdp1-3</i> | 33  | 33  | 80  | 33  | 20  | 7   | 20  | 33  | 7   | 33  | 47  | 13  | 47  | <b>60</b>  | <b>60</b>  |

|                |     |     |     |     |     |     |     |     |     |    |     |     |     |
|----------------|-----|-----|-----|-----|-----|-----|-----|-----|-----|----|-----|-----|-----|
| Position       | 2   | 8   | 15  | 20  | 25  | 27  | 31  | 34  | 36  | 40 | 44  | 46  | 48  |
| Types          | CHH | CG | CHH | CHH | CHG |
| Wt             | 33  | 7   | 0   | 0   | 0   | 33  | 0   | 33  | 0   | 0  | 33  | 33  | 33  |
| <i>nrdp1-3</i> | 73  | 13  | 20  | 27  | 0   | 47  | 7   | 67  | 27  | 20 | 40  | 60  | 60  |

|                |     |     |     |     |     |     |     |     |     |     |     |    |     |
|----------------|-----|-----|-----|-----|-----|-----|-----|-----|-----|-----|-----|----|-----|
| Position       | 51  | 53  | 57  | 61  | 67  | 68  | 73  | 78  | 80  | 86  | 90  | 93 | 97  |
| Types          | CHH | CHH | CHG | CHG | CHH | CHG | CHG | CHH | CHH | CHG | CHH | CG | CHH |
| Wt             | 7   | 53  | 87  | 33  | 33  | 0   | 0   | 7   | 53  | 33  | 87  | 0  | 0   |
| <i>nrdp1-3</i> | 20  | 20  | 53  | 60  | 60  | 13  | 20  | 7   | 13  | 53  | 53  | 20 | 27  |

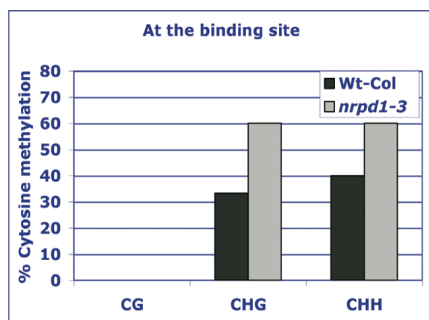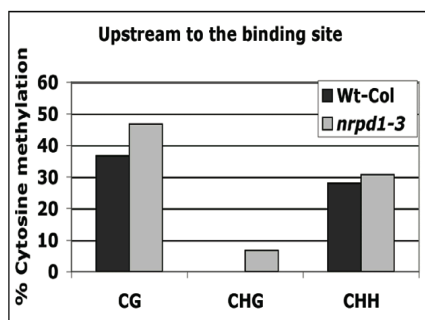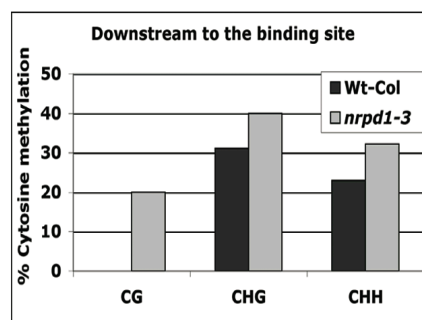

Fig. S5

```
>cand2883 >gil30698542|refINC_003075.3| Arabidopsis thaliana chromosome 4, complete sequence 2179026 2179167
AATTTCTTCAAACCTAAATATCTTAAGGACCTTCAACGGACTTGATAATAGAGATTAACGAACCTTTGATGACAAACGAAGTACAGAGGATCAAATCAAGTAGTAAACCACCTTCTAAAGACAATGCCGAATCTTGAAC
*****AACCTTTGATGACAAACGAAG*****
.....TTAACGAACCTTTGATGAC..... 53 21
.....TAACGAACCTTTGATGACAAACG..... 1 20
.....ACGAACCTTTGATGACAAACGAAG..... 1 23
.....CGAACCTTTGATGACAAACGAAG..... 1 24
.....AACTTTGATGACAAACGAAG..... 2 24
.....AACTTTGATGACAAACGAAG..... 53 21
.....CTTTGATGACAAACGAAG..... 4 22
.....TTTGTGATGACAAACGAAG..... 1 19
.....TTTGTGATGACAAACGAAG..... 6 19
.....TTTGTGATGACAAACGAAGATACA..... 1 23
.....AAGACAATGCCGAATCTTGA..... 2 20
.....AAGACAATGCCGAATCTTGA..... 38 21
.....GACAATGCCGAATCTTGAAC..... 1 20
negative: 0

>cand2328 >gil306986051|refINC_003076.4| Arabidopsis thaliana chromosome 5, complete sequence 15775278 15775419
AATCATGGAAAACAGGAATGATCCTTCAATGTTTTGTAACCTAATGCAAAATGTGCATTAGAAGTGAATGGTCAAGGGAAGCGTACTTGTGCAAAATGCGGCGAGTCAAATTCCTAAACAAGTTGGCAAGCAATCCATTTTGGT
*****AGAAACAAAATGACGACTCGG*****
.....AGAAACAAAATGACGACTCGG..... 35 21
.....AGAAACAAAATGACGACTCGGA..... 35 21
.....AGAAACAAAATGACGACTCGGA..... 1 22
.....AGAAACAAAATGACGACTCGGACA..... 1 24
.....GAAGCAAAATGACGACTCGGA..... 1 21
.....AGCAAAATGACGACTCGGACA..... 2 21
.....AAAATGACGACTCGGACAACA..... 1 21
negative: 0

>cand2831-3p >gil30698537|refINC_003074.4| Arabidopsis thaliana chromosome 3, complete sequence 6217504 6217645
TTTTCTTGGCCCATCACTTC.....
.....ATTAGAAGTGGATTGGTCAAGGGA..... 10 21
.....TTAGAAGTGGATTGGTCAAGG..... 1 21
.....TTAGAAGTGGATTGGTCAAGGGA..... 1 24
.....TAGAAGTGGATTGGTCAAGGGAAG..... 2 24
.....AGAAGTGGATTGGTCAAGGGAAG..... 1 22
.....AGTGGATTGGTCAAGGGAAGCGTA..... 5 24
.....TGGATTGGTCAAGGGAAGCG..... 2 20
.....TGGATTGGTCAAGGGAAGCGT..... 10 21
.....GGATTGGTCAAGGGAAGCGT..... 1 20
.....GGTCAAGGGAAGCGTACTTGTGC..... 2 23
.....TCAAGGGAAGCGTACTTGTGC..... 1 21
.....TCAAGGGAAGCGTACTTGTGCA..... 1 22
.....TCAAGGGAAGCGTACTTGTGCAA..... 1 23
.....CAAGGGAAGCGTACTTGTGCAA..... 1 22
.....TCCTAACAAAGTTGGCAAGC..... 1 20
.....TCCTAACAAAGTTGGCAAGCA..... 1 21
negative: 0

>cand2831-5p >gil30698537|refINC_003074.4| Arabidopsis thaliana chromosome 3, complete sequence 6217444 6217585
AAAAAGTAGCTTGCCTTCCATTTTGTAGGAACCTGATCTGATTTTGTCTCAAGTATGGTTTTCTTGGCCCATCACTTCTAATGTGTTTTGTAACCTAATGCAAAATGTGCATTAGAAGTGGATTGGTCAAGGGAAGCGT
*****TTTTCTTGGCCCATCACTTC*****
.....CTTGCATTTTGTAGGAAC..... 1 21
.....TGCCATTTTGTAGGAACCTGG..... 1 22
.....TTTTCTTGGCCCATCACTTCT..... 1 24
.....TTTTCTTGGCCCATCACTTC..... 1 21
.....ATTAGAAGTGGATTGGTCAAGGGA..... 1 24
.....TTAGAAGTGGATTGGTCAAGG..... 1 21
.....TTAGAAGTGGATTGGTCAAGGGA..... 1 24
.....TAGAAGTGGATTGGTCAAGGGAAG..... 2 24
.....AGAAGTGGATTGGTCAAGGGAAG..... 1 22
.....TGGATTGGTCAAGGGAAGCG..... 2 20
.....TGGATTGGTCAAGGGAAGCGT..... 10 21
.....GGATTGGTCAAGGGAAGCGT..... 1 20
negative: 0

>cand2812 >gil30698537|refINC_003074.4| Arabidopsis thaliana chromosome 3, complete sequence 616814 616957
ATGACAGATTGATTTGGCTCTCCATGACAATTTGCTCATGAAATCTTCTTCCATGGAGTAGATCTATGGAGAGGCACATCATTGTGCAATTGGTAAATCTGTCTGATCGTTTTTTATATGTGTTCTGCTTTTAT
*****GAGTAGATCTATGGAGAGGCACATCA*****
.....CATGGAGTAGATCTATGGAGAGGCACA..... 1 27
.....ATGGAGTAGATCTATGGAGAGG..... 1 22
.....ATGGAGTAGATCTATGGAGAGGCA..... 4 24
.....TGGAGTAGATCTATGGAGAGGCA..... 1 23
.....GGAGTAGATCTATGGAGAGGCACA..... 1 24
.....GGAGTAGATCTATGGAGAGGCACATCA..... 4 27
.....GAGTAGATCTATGGAGAGGCACAT..... 2 24
.....GAGTAGATCTATGGAGAGGCACATCA..... 15 26
.....AGTAGATCTATGGAGAGGCACATCA..... 8 25
.....GTAGATCTATGGAGAGGCACATCA..... 7 24
.....TAGATCTATGGAGAGGCACATCA..... 2 23
.....AGATCTATGGAGAGGCACATCA..... 1 22
.....GATCTATGGAGAGGCACATCA..... 11 21
.....ATCTATGGAGAGGCACATCA..... 4 20
.....TCTATGGAGAGGCACATCA..... 3 19
.....TGTGCAATTGGTAAATCTGTCTGA..... 1 24
negative: 0

>cand2010 >gil30698031|refINC_003071.3| Arabidopsis thaliana chromosome 2, complete sequence 9927138 9927280
TAAATATTTTGCACATATGAAATACAAAGTCAATCCATTTAGATGTGGTCAAAAATATCTACCTGTAATGAAAGGAAATGCAAAAGTCAATCTTGTGGATTCTTGGAAATGAAATGCAAGGAACAGATGTTCTAAT
*****TCTACCTGATTAAATGAAAGGAA*****
.....AAAATATCTACCTGATTAAATGAAAC..... 8 22
.....ATATCTACCTGATTAAATGAAAGGAA..... 1 24
.....TCTACCTGATTAAATGAAAGGAA..... 6 21
.....TCTACCTGATTAAATGAAAGGAA..... 8 22
.....CTACCTGATTAAATGAAAGGAA..... 1 20
.....CTACCTGATTAAATGAAAGGAA..... 1 21
.....TGATTAAATGAAAGGAAATGACA..... 1 21
.....ATGACAAAGTCAATCTTGTGGA..... 1 22
```

```

.....TGACAAAGTCATTCTTGTGG..... 1 20
.....TGTGGATTCCTGGAAATTGAA..... 1 22
negative: 0

```

```

>cand2011 >gil30698537|refINC_003074.4| Arabidopsis thaliana chromosome 3, complete sequence 13047958 13048102
ATAGCTTTGAGTGGCTCCAAGTGTAGAATAAGTAGGATTCCTTGTGGCTTATTTCTGCGGTACTTCAGAAAGTGTTCACCGGTAGTTCAGCGAATGTTGACTCGTAAAAACCTTTCTAGGT
*****GTGCGGTACTTCAGAAAGTAGTTC*****
.....TTTCTGCGGTACTTCAGAAAGTGA..... 2 24
.....TTCTGCGGTACTTCAGAAAGTGA..... 2 24
.....TTCTGCGGTACTTCAGAAAGTGA..... 1 23
.....TCGTGCGGTACTTCAGAAAGTGA..... 1 22
.....TCGTGCGGTACTTCAGAAAGTGA..... 1 23
.....GTGCGGTACTTCAGAAAGTAGTTC..... 2 24
negative: 0

```

```

>cand2012_star >gil30698537|refINC_003074.4| Arabidopsis thaliana chromosome 3, complete sequence 7820237 7820378
ATAAGGAATAGTTTATGTTTATAAATCTAAAAATAAAATTAATCTTATCTTACACTAATAAAAGGGGTTGTGGTAGAGAAAAACAAAATAATGTTCTTTTACTACACAACTTTTTTTTATGATT
*****TAATAAAAGGGGTTGTGGT*****
.TAAGGAATAGTTTATGTTTAT..... 3 21
.....TATCTTACACTAATAAAAGG..... 1 21
.....ACACTAATAAAAGGGGTTGTGG..... 2 21
.....ACTAATAAAAGGGGTTGTGG..... 2 24
.....ACTAATAAAAGGGGTTGTGG..... 1 21
.....ACTAATAAAAGGGGTTGTGGTA..... 3 24
.....CTAATAAAAGGGGTTGTGG..... 2 21
.....CTAATAAAAGGGGTTGTGGTA..... 2 23
.....TAATAAAAGGGGTTGTGGT..... 3 21
.....AATAAAAGGGGTTGTGGTA..... 3 21
.....ATAAAAGGGGTTGTGGTA..... 1 20
.....ATAAAAGGGGTTGTGGTAG..... 2 21
.....AAAAGGGGTTGTGGTAGAGAAA..... 1 24
.....AAAGGGGTTGTGGTAGA..... 1 19
.....AAAGGGGTTGTGGTAGAGA..... 1 21
.....AAAGGGGTTGTGGTAGAGAAA..... 1 23
.....AAGGGGTTGTGGTAGAGAAA..... 3 21
.....AGGGGTTGTGGTAGAGAAA..... 2 21
negative: 0

```

```

>cand2012 >gil30698537|refINC_003074.4| Arabidopsis thaliana chromosome 3, complete sequence 7820325 7820466
AAAAACAAAATAAGTCTTTTCTACTACACAACTTTTTTTAGATTTTTCTCTACCAAAAACCGCTTTTATTAGTGAAGAATAAAATAAATCCCTTATCTCGAATTTATAAACGTAACAACTCTTATC
.....TACCACAAAACCGCTTTTATT..... 54 21
.....TTTTCTCTACCAAAAACCGCT..... 9 24
.....TTTTCTCTACCAAAAACCGCT..... 1 22
.....TTTCTCTACCAAAAACCGCT..... 4 21
.....TTTCTCTACCAAAAACCGCT..... 2 22
.....TTCTCTACCAAAAACCGCT..... 16 21
.....TCTCTACCAAAAACCGCT..... 1 19
.....TCTCTACCAAAAACCGCT..... 1 20
.....TCTCTACCAAAAACCGCTTT..... 13 21
.....TCTCTACCAAAAACCGCTTTAT..... 3 24
.....CTCTACCAAAAACCGCT..... 1 19
.....CTCTACCAAAAACCGCTTT..... 1 20
.....CTCTACCAAAAACCGCTTTT..... 3 21
.....CTCTACCAAAAACCGCTTTTAT..... 1 23
.....CTCTACCAAAAACCGCTTTTATT..... 1 24
.....TCTACCAAAAACCGCTTT..... 1 19
.....TCTACCAAAAACCGCTTTTA..... 14 20
.....TCTACCAAAAACCGCTTTTAT..... 3 21
.....TCTACCAAAAACCGCTTTTATT..... 2 22
.....CTACCAAAAACCGCTTTA..... 1 19
.....CTACCAAAAACCGCTTTTAT..... 11 20
.....CTACCAAAAACCGCTTTTATT..... 1 22
.....TACCACAAAACCGCTTTTAT..... 1 20
.....TACCACAAAACCGCTTTTATT..... 54 21
.....TACCACAAAACCGCTTTTATTA..... 1 22
.....TACCACAAAACCGCTTTTATTAGT..... 12 24
.....ACCACAAAACCGCTTTTAT..... 1 19
.....ACCACAAAACCGCTTTTATT..... 1 20
.....ACCACAAAACCGCTTTTATTA..... 4 21
.....ACCACAAAACCGCTTTTATTAGT..... 1 25
.....CCACAAAACCGCTTTTATT..... 1 19
.....CCACAAAACCGCTTTTATTAG..... 1 21
.....CCACAAAACCGCTTTTATTAGT..... 1 24
.....AAACCGCTTTTATTAGTGA..... 1 20
.....CCGCTTTTATTAGTGAAGAA..... 6 21
negative: 0

```

```

>cand2014 >gil30698542|refINC_003075.3| Arabidopsis thaliana chromosome 4, complete sequence 6787040 6787184
AGAATTGCGTTGATCAGAAAATCAAGATATCCAACCTTGTGGAGTTTGTATTACGATGCAATCTCACCTTCTTATGCCATGACCATCACTCATAATATCTCTCAGTTATATTGCTTATGTTCTTTGTGGTGAAAA
*****AATCTCACCTTCTTATGCCAT*****
.....ATAATTATGAGTGATGGTCATGGC..... 47 24
.....AATTATGAGTGATGGTCATGG..... 1 21
.....AATTATGAGTGATGGTCATGGC..... 1 22
.....AATTATGAGTGATGGTCATGGCAT..... 1 24
.....TTATGAGTGATGGTCATGGCA..... 1 21
.....ATGAGTGATGGTCATGGCATGAAA..... 1 24
.....GAGTGATGGTCATGGCATGAAAAGA..... 1 24
.....AGTGATGGTCATGGCATGAAAAGA..... 1 23
.....AGTGATGGTCATGGCATGAAAAGA..... 1 24
.....TGGTCATGGCATGAAAAGGTTGA..... 1 24
.....ATGGCATGAAAAGGTTGAG..... 2 20
.....ATGGCATGAAAAGGTTGAGA..... 23 21
.....ATGGCATGAAAAGGTTGAGAA..... 5 22
.....ATGGCATGAAAAGGTTGAGAAAT..... 2 23
.....ATGGCATGAAAAGGTTGAGAAAT..... 47 24
.....ATGGCATGAAAAGGTTGAGAAATG..... 2 25
.....TGGCATGAAAAGGTTGAGAA..... 1 21
.....TGGCATGAAAAGGTTGAGAAATG..... 1 25
.....GGCATGAAAAGGTTGAGAA..... 2 19
.....GGCATGAAAAGGTTGAGAAAT..... 1 22
.....TGAAGAAGGTTGAGAAATGCA..... 1 21
negative: 0

```

```

>cand2018 >gil30698537|refINC_003074.4| Arabidopsis thaliana chromosome 3, complete sequence 10309268 10309406

```

```

CAATCTAAATATTAACGTTTTTCATGTGTTGGATACTTGGATATATGATGCTTAAATGATGGCCTAGTGGTAGAGTAAATAATGTAAATACTTTTTTAAACATCAAAAATAAATGATACACGATTTTTTATACT
*****TGGCCTAGTGGTAGAGTA*****
.....ATGGCCTAGTGGTAGAGTA.....
.....TGGCCTAGTGGTAGAGTA.....
negative: 0

```

|    |    |
|----|----|
| 36 | 18 |
| 4  | 19 |
| 36 | 18 |

```

>cand2022 >gil30698537|refINC_003074.4| Arabidopsis thaliana chromosome 3, complete sequence 7089656 7089794
TCAATAAAAACTAACTTTATGCAGCAAGTCCAATTTTGTTCGGAGCTGTAGTTAGAAAAGATAGAGAACATGTGAATTGCGTGAAGCTTCTACTTTATCGATCGAATTATAAGTCGAGATTAGGGTTTTT
*****GAAAGAAGATAGAGAACA*****
.....TAGAAGAAGATAGAGAA.....
.....GAAAGAAGATAGAGAACATG.....
.....GAAAGAAGATAGAGAACA.....
.....CTTTATGCAGCAAGTCCAATTTTGT.....
negative: 0

```

|    |    |
|----|----|
| 28 | 18 |
| 2  | 18 |
| 2  | 20 |
| 28 | 18 |
| 1  | 26 |

Fig. S6

|                                                                                                                                                                                                                                              |  |             |    |
|----------------------------------------------------------------------------------------------------------------------------------------------------------------------------------------------------------------------------------------------|--|-------------|----|
| <p>&gt;ath-miR156a_MIMAT0000166_Arabidopsis_thaliana_miR156a<br/>ATCTCTGAAGTTGGACTAATGTGAATGAAAGAGTTGGGCAAGAGAAACGCAAGAAACTGACAGAAGAGAGTGGCCACAAAGGCATTTGCATATCATTGCACCTGTCTCTCTCGTGTCTCACTGCTCTTCTGTG<br/>*****TGCAGAAGAGAGTGGCCAC*****</p> |  | ath-miR156a | 20 |
| .....AAACTGACAGAAGAGAGTGGCCA.....                                                                                                                                                                                                            |  | 3           | 23 |
| .....ACTGACAGAAGAGAGTGGCCA.....                                                                                                                                                                                                              |  | 6           | 21 |
| .....ACTGACAGAAGAGAGTGGCCACA.....                                                                                                                                                                                                            |  | 12          | 23 |
| .....CTGACAGAAGAGAGTGGCCA.....                                                                                                                                                                                                               |  | 4           | 20 |
| .....CTGACAGAAGAGAGTGGCCAC.....                                                                                                                                                                                                              |  | 142         | 21 |
| .....CTGACAGAAGAGAGTGGCCACA.....                                                                                                                                                                                                             |  | 1           | 22 |
| .....TGACAGAAGAGAGTGGCC.....                                                                                                                                                                                                                 |  | 68          | 18 |
| .....TGACAGAAGAGAGTGGCCA.....                                                                                                                                                                                                                |  | 277         | 19 |
| .....TGACAGAAGAGAGTGGCCAC.....                                                                                                                                                                                                               |  | 33405       | 20 |
| .....TGACAGAAGAGAGTGGCCACA.....                                                                                                                                                                                                              |  | 1147        | 21 |
| .....TGACAGAAGAGAGTGGCCACAC.....                                                                                                                                                                                                             |  | 1           | 22 |
| .....GACAGAAGAGAGTGGCCA.....                                                                                                                                                                                                                 |  | 30          | 18 |
| .....GACAGAAGAGAGTGGCCAC.....                                                                                                                                                                                                                |  | 2329        | 19 |
| .....GACAGAAGAGAGTGGCCACA.....                                                                                                                                                                                                               |  | 120         | 20 |
| .....GACAGAAGAGAGTGGCCACAC.....                                                                                                                                                                                                              |  | 1           | 21 |
| .....ACAGAAGAGAGTGGCCAC.....                                                                                                                                                                                                                 |  | 72          | 18 |
| .....ACAGAAGAGAGTGGCCACA.....                                                                                                                                                                                                                |  | 5           | 19 |
| .....GAAGAGAGTGGCCACACAAG.....                                                                                                                                                                                                               |  | 1           | 21 |
| <p>&gt;ath-miR156b_MIMAT0000167_Arabidopsis_thaliana_miR156b<br/>TTTTTGAAATGATGCTAGAAGGGGAGAGATGATTGAGGAATGCAACAGAGAAACTGACAGAAGAGAGTGGCCACATGCAGGCACCTGTTATGTGTCTAACTTTCGCTGTGCTGCTCACCTCTCTTCTGTCA<br/>*****TGCAGAAGAGAGTGGCCAC*****</p>   |  | ath-miR156b | 20 |
| .....AAACTGACAGAAGAGAGTGGCCA.....                                                                                                                                                                                                            |  | 3           | 23 |
| .....ACTGACAGAAGAGAGTGGCCA.....                                                                                                                                                                                                              |  | 6           | 21 |
| .....ACTGACAGAAGAGAGTGGCCACA.....                                                                                                                                                                                                            |  | 12          | 23 |
| .....CTGACAGAAGAGAGTGGCCA.....                                                                                                                                                                                                               |  | 4           | 20 |
| .....CTGACAGAAGAGAGTGGCCAC.....                                                                                                                                                                                                              |  | 142         | 21 |
| .....CTGACAGAAGAGAGTGGCCACA.....                                                                                                                                                                                                             |  | 1           | 22 |
| .....TGACAGAAGAGAGTGGCC.....                                                                                                                                                                                                                 |  | 68          | 18 |
| .....TGACAGAAGAGAGTGGCCA.....                                                                                                                                                                                                                |  | 277         | 19 |
| .....TGACAGAAGAGAGTGGCCAC.....                                                                                                                                                                                                               |  | 33405       | 20 |
| .....TGACAGAAGAGAGTGGCCACA.....                                                                                                                                                                                                              |  | 1147        | 21 |
| .....TGACAGAAGAGAGTGGCCACAT.....                                                                                                                                                                                                             |  | 1           | 22 |
| .....GACAGAAGAGAGTGGCCA.....                                                                                                                                                                                                                 |  | 30          | 18 |
| .....GACAGAAGAGAGTGGCCAC.....                                                                                                                                                                                                                |  | 2329        | 19 |
| .....GACAGAAGAGAGTGGCCACA.....                                                                                                                                                                                                               |  | 120         | 20 |
| .....GACAGAAGAGAGTGGCCACAT.....                                                                                                                                                                                                              |  | 1           | 21 |
| .....ACAGAAGAGAGTGGCCAC.....                                                                                                                                                                                                                 |  | 72          | 18 |
| .....ACAGAAGAGAGTGGCCACA.....                                                                                                                                                                                                                |  | 5           | 19 |
| .....TGCTCACCTCTCTTCTG.....                                                                                                                                                                                                                  |  | 1           | 18 |
| <p>&gt;ath-miR156c_MIMAT0000168_Arabidopsis_thaliana_miR156c<br/>TAATGAGTGATGACTGATGAGGGAGTTTGGGCAAAATTTAAGAGAAACGATAGAAACTGACAGAAGAGAGTGGCCACAAAGGCATTTGCATGTCGATGCAATTTCTTCTTTCGCTGCTCACTGCTCTATCTG<br/>*****TGCAGAAGAGAGTGGCCAC*****</p>  |  | ath-miR156c | 20 |
| .....AAACTGACAGAAGAGAGTGGCCA.....                                                                                                                                                                                                            |  | 3           | 23 |
| .....ACTGACAGAAGAGAGTGGCCA.....                                                                                                                                                                                                              |  | 6           | 21 |
| .....ACTGACAGAAGAGAGTGGCCACA.....                                                                                                                                                                                                            |  | 12          | 23 |
| .....CTGACAGAAGAGAGTGGCCA.....                                                                                                                                                                                                               |  | 4           | 20 |
| .....CTGACAGAAGAGAGTGGCCAC.....                                                                                                                                                                                                              |  | 142         | 21 |
| .....CTGACAGAAGAGAGTGGCCACA.....                                                                                                                                                                                                             |  | 1           | 22 |
| .....TGACAGAAGAGAGTGGCC.....                                                                                                                                                                                                                 |  | 68          | 18 |
| .....TGACAGAAGAGAGTGGCCA.....                                                                                                                                                                                                                |  | 277         | 19 |
| .....TGACAGAAGAGAGTGGCCAC.....                                                                                                                                                                                                               |  | 33405       | 20 |
| .....TGACAGAAGAGAGTGGCCACA.....                                                                                                                                                                                                              |  | 1147        | 21 |
| .....TGACAGAAGAGAGTGGCCACAC.....                                                                                                                                                                                                             |  | 1           | 22 |
| .....GACAGAAGAGAGTGGCCA.....                                                                                                                                                                                                                 |  | 30          | 18 |
| .....GACAGAAGAGAGTGGCCAC.....                                                                                                                                                                                                                |  | 2329        | 19 |
| .....GACAGAAGAGAGTGGCCACA.....                                                                                                                                                                                                               |  | 120         | 20 |
| .....GACAGAAGAGAGTGGCCACAC.....                                                                                                                                                                                                              |  | 1           | 21 |
| .....ACAGAAGAGAGTGGCCAC.....                                                                                                                                                                                                                 |  | 72          | 18 |
| .....ACAGAAGAGAGTGGCCACA.....                                                                                                                                                                                                                |  | 5           | 19 |
| .....GAAGAGAGTGGCCACACAAG.....                                                                                                                                                                                                               |  | 1           | 21 |
| <p>&gt;ath-miR156d_MIMAT0000169_Arabidopsis_thaliana_miR156d<br/>TTCTAAATATATTTAGTGTCTAATACTAGATAAATATATGTTGATGGGGAAAGAGTTGACAGAAGAGAGTGGCCACAAAGGGGAAGTTGATAAAAGTTTGTATATGTTGCTTTTTCGCTGCTCACTCTTT<br/>*****TGCAGAAGAGAGTGGCCAC*****</p>    |  | ath-miR156d | 20 |
| .....AAAGAAGTTGACAGAAGAGA.....                                                                                                                                                                                                               |  | 1           | 20 |
| .....AAGTTGACAGAAGAGAGTGG.....                                                                                                                                                                                                               |  | 6           | 21 |
| .....AGTTGACAGAAGAGAGTGGCC.....                                                                                                                                                                                                              |  | 1           | 21 |
| .....GTTGACAGAAGAGAGTGGCCAC.....                                                                                                                                                                                                             |  | 15          | 22 |
| .....TTGACAGAAGAGAGTGG.....                                                                                                                                                                                                                  |  | 11          | 18 |
| .....TTGACAGAAGAGAGTGGCC.....                                                                                                                                                                                                                |  | 106         | 19 |
| .....TTGACAGAAGAGAGTGGCCA.....                                                                                                                                                                                                               |  | 293         | 20 |
| .....TTGACAGAAGAGAGTGGCCAC.....                                                                                                                                                                                                              |  | 32630       | 21 |
| .....TTGACAGAAGAGAGTGGCCACA.....                                                                                                                                                                                                             |  | 46          | 22 |
| .....TTGACAGAAGAGAGTGGCCACAC.....                                                                                                                                                                                                            |  | 6           | 23 |
| .....TGACAGAAGAGAGTGGCC.....                                                                                                                                                                                                                 |  | 68          | 18 |
| .....TGACAGAAGAGAGTGGCCA.....                                                                                                                                                                                                                |  | 277         | 19 |
| .....TGACAGAAGAGAGTGGCCAC.....                                                                                                                                                                                                               |  | 33405       | 20 |
| .....TGACAGAAGAGAGTGGCCACA.....                                                                                                                                                                                                              |  | 1147        | 21 |
| .....TGACAGAAGAGAGTGGCCACAC.....                                                                                                                                                                                                             |  | 1           | 22 |
| .....GACAGAAGAGAGTGGCCA.....                                                                                                                                                                                                                 |  | 30          | 18 |
| .....GACAGAAGAGAGTGGCCAC.....                                                                                                                                                                                                                |  | 2329        | 19 |
| .....GACAGAAGAGAGTGGCCACA.....                                                                                                                                                                                                               |  | 120         | 20 |
| .....GACAGAAGAGAGTGGCCACAC.....                                                                                                                                                                                                              |  | 1           | 21 |
| .....ACAGAAGAGAGTGGCCAC.....                                                                                                                                                                                                                 |  | 72          | 18 |
| .....ACAGAAGAGAGTGGCCACA.....                                                                                                                                                                                                                |  | 5           | 19 |
| .....GAAGAGAGTGGCCACACAAG.....                                                                                                                                                                                                               |  | 1           | 21 |
| <p>&gt;ath-miR157a_MIMAT0000172_Arabidopsis_thaliana_miR157a<br/>TCAATCGTAAATCAAATATCGATATTTAATGTTGAGAATTGAGAGCATTGATAGTGTTCAGAGAAGATAGAGAGCACAGATGATGAGATACAATTCGGAGCATGTTCTTTCATCTACTCTTGTGCTCTAGC<br/>*****TTGACAGAAGATAGAGAGCC*****</p>  |  | ath-miR157a | 21 |

```

.....AATTGTTTGAGAATTGAGAGCCAT..... 1 24
.....TGAGAATTGAGAGCCATTGATAGT..... 1 24
.....GAGAGCCATTGATAGTGTGCA..... 2 23
.....ATTGATAGTGTGACAGAAGA..... 1 21
.....ATTGATAGTGTGACAGAAGATAG..... 1 24
.....TGATAGTGTGACAGAAGATAGAG..... 5 24
.....GATAGTGTGACAGAAGATAGAGA..... 2 24
.....ATAGTGTGACAGAAGATAGAGAG..... 1 24
.....AGTGTGACAGAAGATAGAGAGCA..... 3 24
.....GTGTTGACAGAAGATAGAGAGCAC..... 2 24
.....GTGTTGACAGAAGATAGAGAGCACA..... 1 25
.....TGTGACAGAAGATAGAGAGCAC..... 1 23
.....GTTGACAGAAGATAGAGAGCA..... 1 21
.....GTTGACAGAAGATAGAGAGCAC..... 4 22
.....TTGACAGAAGATAGAGAG..... 159 18
.....TTGACAGAAGATAGAGAGC..... 515 19
.....TTGACAGAAGATAGAGAGCA..... 1738 20
.....TTGACAGAAGATAGAGAGCAC..... 137693 21
.....TTGACAGAAGATAGAGAGCACA..... 355 22
.....TGACAGAAGATAGAGAGC..... 46 18
.....TGACAGAAGATAGAGAGCA..... 150 19
.....TGACAGAAGATAGAGAGCAC..... 13487 20
.....TGACAGAAGATAGAGAGCACA..... 52 21
.....GACAGAAGATAGAGAGCA..... 22 18
.....GACAGAAGATAGAGAGCAC..... 315 19
.....GACAGAAGATAGAGAGCACA..... 1 20
.....ACAGAAGATAGAGAGCAC..... 151 18
.....ACAGAAGATAGAGAGCACA..... 1 19
.....ACAGAAGATAGAGAGCACAGA..... 1 21
.....AGATAGAGAGCACAGATGATGAGA..... 1 24
.....TAGAGAGCACAGATGATGAGATA..... 1 23
.....AGAGAGCACAGATGATGAGAT..... 1 21
.....AGAGAGCACAGATGATGAGATACA..... 1 24
.....ACAGATGATGAGATACAATTCCGA..... 1 24

```

>ath-miR157b\_MIMAT000173\_Arabidopsis\_thaliana\_miR157b

```

TATATTTTCAACTGMAAATAAAATCGATTTTAAATGGTTGGAGGCATTGATAGTGTGACAGAAGATAGAGAGCACAGATGATAAGATACAATTCCTCGAGCTCTTTGCATCTTACTCCTTTGTCTCTTACG
*****TTGACAGAAGATAGAGAGCAC*****ath-miR157b 21
.....ATTGATAGTGTGACAGAAGA..... 1 21
.....ATTGATAGTGTGACAGAAGATAG..... 1 24
.....TGATAGTGTGACAGAAGATAGAG..... 5 24
.....GATAGTGTGACAGAAGATAGAGA..... 2 24
.....ATAGTGTGACAGAAGATAGAGAG..... 1 24
.....AGTGTGACAGAAGATAGAGAGCA..... 3 24
.....GTGTTGACAGAAGATAGAGAGCAC..... 2 24
.....GTGTTGACAGAAGATAGAGAGCACA..... 1 25
.....TGTGACAGAAGATAGAGAGCAC..... 1 23
.....GTTGACAGAAGATAGAGAGCA..... 1 21
.....GTTGACAGAAGATAGAGAGCAC..... 4 22
.....TTGACAGAAGATAGAGAG..... 159 18
.....TTGACAGAAGATAGAGAGC..... 515 19
.....TTGACAGAAGATAGAGAGCA..... 1738 20
.....TTGACAGAAGATAGAGAGCAC..... 137693 21
.....TTGACAGAAGATAGAGAGCACA..... 355 22
.....TGACAGAAGATAGAGAGC..... 46 18
.....TGACAGAAGATAGAGAGCA..... 150 19
.....TGACAGAAGATAGAGAGCAC..... 13487 20
.....TGACAGAAGATAGAGAGCACA..... 52 21
.....GACAGAAGATAGAGAGCA..... 22 18
.....GACAGAAGATAGAGAGCAC..... 315 19
.....GACAGAAGATAGAGAGCACA..... 1 20
.....ACAGAAGATAGAGAGCAC..... 151 18
.....ACAGAAGATAGAGAGCACA..... 1 19
.....ACAGAAGATAGAGAGCACAGA..... 1 21

```

>ath-miR157c\_MIMAT000174\_Arabidopsis\_thaliana\_miR157c

```

TACACATACATCTTATGATGTTGCATATCACACATAGTTTTGAGAGTGTGTTGTTGACAGAAGATAGAGAGCACTAAGATGACATGCAAGTACATACATATATATCATCACACCGCATGGATGATAAAATA
*****TTGACAGAAGATAGAGAGCAC*****ath-miR157c 21
.....AGAGTGTGTTGTTGTTGCA..... 1 22
.....TTGGTGTGTTGACAGAAGATAGAG..... 1 23
.....TGTGACAGAAGATAGAGAGCAC..... 1 23
.....GTTGACAGAAGATAGAGAGCAC..... 1 21
.....GTTGACAGAAGATAGAGAGCAC..... 4 22
.....TTGACAGAAGATAGAGAG..... 159 18
.....TTGACAGAAGATAGAGAGC..... 515 19
.....TTGACAGAAGATAGAGAGCA..... 1738 20
.....TTGACAGAAGATAGAGAGCAC..... 137693 21
.....TTGACAGAAGATAGAGAGCACT..... 1320 22
.....TTGACAGAAGATAGAGAGCACTA..... 240 23
.....TTGACAGAAGATAGAGAGCACTAA..... 2 24
.....TGACAGAAGATAGAGAGC..... 46 18
.....TGACAGAAGATAGAGAGCA..... 150 19
.....TGACAGAAGATAGAGAGCAC..... 13487 20
.....TGACAGAAGATAGAGAGCACT..... 188 21
.....TGACAGAAGATAGAGAGCACTA..... 65 22
.....GACAGAAGATAGAGAGCA..... 22 18
.....GACAGAAGATAGAGAGCAC..... 315 19
.....GACAGAAGATAGAGAGCACT..... 5 20
.....GACAGAAGATAGAGAGCACTA..... 4 21
.....ACAGAAGATAGAGAGCAC..... 151 18
.....ACAGAAGATAGAGAGCACT..... 1 19
.....ACAGAAGATAGAGAGCACTA..... 1 20
.....ACAGAAGATAGAGAGCACTAA..... 3 21
.....ACAGAAGATAGAGAGCACTAAGG..... 1 23
.....CAGAAGATAGAGAGCACT..... 1 18
.....CAGAAGATAGAGAGCACTAAG..... 2 21
.....AGAAGATAGAGAGCACTAAGGAT..... 4 24
.....AAGATAGAGAGCACTAAGGAT..... 1 23
.....AAGATAGAGAGCACTAAGGAT..... 2 21

```

```

>ath-miR157d_MIMAT0000175_Arabidopsis_thaliana_miR157d
ATATTATATCAAAACCGCAAGATGCTGTATGTATAGTGGAGGGTATAGTGGTTGCTGACAGAAGTAGAGAGCACTAAGGATGCTATGCAAAAACAGACAGATATGTTTCTAATTGTATTTCATACATTTAAAC
*****TGACAGAAGTAGAGAGCAC*****
.....GTGGTTGCTGACAGAAGTAGAGA.....
.....CTGACAGAAGTAGAGAG.....
.....CTGACAGAAGTAGAGAGCA.....
.....CTGACAGAAGTAGAGAGCAC.....
.....CTGACAGAAGTAGAGAGCACT.....
.....TGACAGAAGTAGAGAGC.....
.....TGACAGAAGTAGAGAGCA.....
.....TGACAGAAGTAGAGAGCAC.....
.....TGACAGAAGTAGAGAGCACT.....
.....TGACAGAAGTAGAGAGCACTA.....
.....GACAGAAGTAGAGAGCA.....
.....GACAGAAGTAGAGAGCAC.....
.....GACAGAAGTAGAGAGCACT.....
.....GACAGAAGTAGAGAGCACTA.....
.....ACAGAAGTAGAGAGCAC.....
.....ACAGAAGTAGAGAGCACT.....
.....ACAGAAGTAGAGAGCACTA.....
.....ACAGAAGTAGAGAGCACTAA.....
.....ACAGAAGTAGAGAGCACTAAGG.....
.....CAGAAGTAGAGAGCACT.....
.....CAGAAGTAGAGAGCACTAAG.....
.....CAGAAGTAGAGAGCACTAAGGAT.....
.....AGAAGTAGAGAGCACTAAGGAT.....
.....AAGTAGAGAGCACTAAGGAT.....
.....AAGTAGAGAGCACTAAGGAT.....
ath-miR157d      20
1      24
1      18
3      20
207    21
2      22
46     18
150    19
13487  20
188    21
65     22
22     18
315    19
5      20
4      21
151    18
1      19
1      20
3      21
1      23
1      18
2      21
4      24
1      23
2      21

```

```

>ath-miR158a_MIMAT0000176_Arabidopsis_thaliana_miR158a
ACGTCACTCTGTGCTTCTTTGTCTACAATTTGGAAAAGTGATGACGCCATTGCTCTTTCCAAATGTAGACAAAGCAATACCGTGATGATCGTGGAGATTTTGTGAGATGCTACGAGCGTGAATGTTTCATG
*****TCCCAAATGTAGACAAAGCA*****
.....TCTTTGTCTACAATTTGGAAA.....
.....CTTTGTCTACAATTTGGAAA.....
.....CTTTGTCTACAATTTGGAAA.....
.....CTTTGTCTACAATTTGGAAA.....
.....TTGTCTACAATTTGGAAA.....
.....TTGTCTACAATTTGGAAA.....
.....AAGTGATGACGCCATTGCTCT.....
.....AAGTGATGACGCCATTGCTCT.....
.....TCTTTCCAAATGTAGACAAA.....
.....TCTTTCCAAATGTAGACAAAGC.....
.....TCTTTCCAAATGTAGACAAAGCA.....
.....CTTTCCAAATGTAGACA.....
.....CTTTCCAAATGTAGACAAAG.....
.....TTTCCAAATGTAGACAAAGC.....
.....TTCCAAATGTAGACAAA.....
.....TTCCAAATGTAGACAAAG.....
.....TTCCAAATGTAGACAAAGC.....
.....TTCCAAATGTAGACAAAGCA.....
.....TTCCAAATGTAGACAAAGCAA.....
.....TCCCAAATGTAGACAAAG.....
.....TCCCAAATGTAGACAAAGC.....
.....TCCCAAATGTAGACAAAGCA.....
.....TCCCAAATGTAGACAAAGCA.....
.....TCCCAAATGTAGACAAAGCAAT.....
.....TCCCAAATGTAGACAAAGCAATA.....
.....CCCAAATGTAGACAAAGC.....
.....CCCAAATGTAGACAAAGCA.....
.....CCCAAATGTAGACAAAGCA.....
.....CCCAAATGTAGACAAAGCA.....
.....CCCAAATGTAGACAAAGCA.....
.....CCCAAATGTAGACAAAGCA.....
.....AATGTAGACAAAGCAATACCG.....
.....GCAATACCGTGATGATGTCGT.....
ath-miR158a      20
2      22
2      20
37     21
1      22
1      21
1      21
2      21
4      22
11     21
1      23
7      24
1      18
35     21
8      21
1      18
8      19
14     20
1714   21
2      22
490    18
809    19
99502  20
128    21
8      22
3      23
33     18
4983   19
4      20
4      20
82     18
1      19
1      21
1      21

```

```

>ath-miR160a_MIMAT0000178_Arabidopsis_thaliana_miR160a
ATAACCATGTATATGTCATGACCCATATACATATAGATGATATATATATATGATGCTGGCTCCCTGTATGCCATATGCTGAGCCATCGAGTATCGATGACCTCCGTGGATGGCGTATGAGGAGCCATGCATA
*****TGCCCTGGCTCCCTGTATGCCA*****
.....ATGCTGGCTCCCTGTATGCC.....
.....ATGCTGGCTCCCTGTATGCC.....
.....ATGCTGGCTCCCTGTATGCC.....
.....ATGCTGGCTCCCTGTATGCCA.....
.....TGCTGGCTCCCTGTATG.....
.....TGCTGGCTCCCTGTATGC.....
.....TGCTGGCTCCCTGTATGCC.....
.....TGCTGGCTCCCTGTATGCCA.....
.....TGCTGGCTCCCTGTATGCCAT.....
.....TGCTGGCTCCCTGTATGCCATA.....
.....GCCTGGCTCCCTGTATGCC.....
.....GCCTGGCTCCCTGTATGCCA.....
.....CTGGCTCCCTGTATGCCA.....
.....CTGGCTCCCTGTATGCCA.....
.....TATGCCATATGCTGAGCCATCG.....
.....ATCGATGACCTCCGTGGATG.....
.....GCGTATGAGGAGCCATGCA.....
.....GCGTATGAGGAGCCATGCAT.....
.....GCGTATGAGGAGCCATGCATA.....
.....CGTATGAGGAGCCATGCA.....
.....CGTATGAGGAGCCATGCATA.....
.....TATGAGGAGCCATGCATA.....
ath-miR160a      21
3      22
1      20
353    21
4      22
2      18
1      19
20     20
4462  21
6      22
4      23
10     19
230    20
12     19
9      18
1      23
1      20
20     19
19     20
1450   21
1      18
13     20
1      18

```

```

>ath-miR160c_MIMAT0000180_Arabidopsis_thaliana_miR160c
ATATGTCATGCTAGAGGTTTGGTATACAAATATATACATATAATAGTTTGTGCTTATGCTGGCTCCCTGTATGCCACGAGTGATACCGATTTTGGTTTAAATCGGCTGCCGGTGGCTACAAGGAGTCAAGCA
*****TGCCCTGGCTCCCTGTATGCCA*****
.....ATGCTGGCTCCCTGTATGCC.....
.....ATGCTGGCTCCCTGTATGCC.....
.....ATGCTGGCTCCCTGTATGCC.....
ath-miR160c      21
3      22
1      20
353    21

```



|                                    |      |    |
|------------------------------------|------|----|
| .....ATGCCTGGCTCCCTGTATGCCA.....   | 4    | 22 |
| .....TGCTGGCTCCCTGTATG.....        | 2    | 18 |
| .....TGCTGGCTCCCTGTATGC.....       | 1    | 19 |
| .....TGCTGGCTCCCTGTATGCC.....      | 20   | 20 |
| .....TGCTGGCTCCCTGTATGCCA.....     | 4462 | 21 |
| .....TGCTGGCTCCCTGTATGCCAC.....    | 1    | 21 |
| .....GCCTGGCTCCCTGTATGCC.....      | 10   | 19 |
| .....GCCTGGCTCCCTGTATGCCA.....     | 230  | 20 |
| .....CCTGGCTCCCTGTATGCCA.....      | 12   | 19 |
| .....CCTGGCTCCCTGTATGCCACG.....    | 1    | 21 |
| .....CTGGCTCCCTGTATGCCA.....       | 9    | 18 |
| .....GCTCCCTGTATGCCACGAGTGAT.....  | 2    | 24 |
| .....ATCGGCTGCCGGTGGCGTA.....      | 1    | 19 |
| .....ATCGGCTGCCGGTGGCGTACAAGG..... | 1    | 24 |
| .....CTGCCGGTGGCGTACAAGGAGTC.....  | 8    | 23 |
| .....CTGCCGGTGGCGTACAAGGAGTCA..... | 2    | 24 |
| .....TGCCGGTGGCGTACAAGGAGTC.....   | 1    | 22 |
| .....CGGTGGCGTACAAGGAGT.....       | 1    | 18 |
| .....TGGCGTACAAGGAGTCAAGCA.....    | 2    | 21 |
| .....GCGTACAAGGAGTCAAGC.....       | 34   | 18 |
| .....GCGTACAAGGAGTCAAGCA.....      | 156  | 19 |
| .....CGTACAAGGAGTCAAGCA.....       | 18   | 18 |

>ath-miR161.2\_MIMAT0006779\_Arabidopsis\_thaliana\_miR161.2

|                                                                                                                                        |       |    |              |    |
|----------------------------------------------------------------------------------------------------------------------------------------|-------|----|--------------|----|
| AGCTTTGATCAGTACTTCTCTTTGCTTGATCTCGGTTTTTGACAGTTATTGGCTGATCAATGCATTGAAAGTACTACATCGGGTTCGGATTTTTTTGTTCTTCATATGATGAAGCGGAAACAGTAATCAACCTC |       |    | ath-miR161.2 | 21 |
| *****TCAATGCATTGAAAGTACTA*****                                                                                                         |       |    |              |    |
| .....TCTCTTTGCTTGATCTCGGTT.....                                                                                                        | 1     | 22 |              |    |
| .....CTCTTTGCTTGATCTCGGTT.....                                                                                                         | 1     | 21 |              |    |
| .....ATTGCGTCGATCAATGCA.....                                                                                                           | 1     | 18 |              |    |
| .....CGATCAATGCATTGAAAGTGA.....                                                                                                        | 1     | 21 |              |    |
| .....TCAATGCATTGAAAGTGA.....                                                                                                           | 6     | 18 |              |    |
| .....TCAATGCATTGAAAGTGAC.....                                                                                                          | 92    | 19 |              |    |
| .....TCAATGCATTGAAAGTGACT.....                                                                                                         | 142   | 20 |              |    |
| .....TCAATGCATTGAAAGTGACTA.....                                                                                                        | 4564  | 21 |              |    |
| .....TCAATGCATTGAAAGTGACTAC.....                                                                                                       | 5     | 22 |              |    |
| .....CAATGCATTGAAAGTGACT.....                                                                                                          | 5     | 18 |              |    |
| .....CAATGCATTGAAAGTGACT.....                                                                                                          | 4     | 19 |              |    |
| .....CAATGCATTGAAAGTGACTA.....                                                                                                         | 186   | 20 |              |    |
| .....AATGCATTGAAAGTGACTA.....                                                                                                          | 5     | 19 |              |    |
| .....TGCATTGAAAGTGACTACA.....                                                                                                          | 1     | 19 |              |    |
| .....TGCATTGAAAGTGACTACATC.....                                                                                                        | 1     | 21 |              |    |
| .....TGCATTGAAAGTGACTACATCGGG.....                                                                                                     | 68    | 24 |              |    |
| .....TGCATTGAAAGTGACTACATCGGGG.....                                                                                                    | 1     | 25 |              |    |
| .....GCATTGAAAGTGACTACATCGGG.....                                                                                                      | 1     | 23 |              |    |
| .....CATTGAAAGTGACTACATCGG.....                                                                                                        | 7     | 21 |              |    |
| .....CATTGAAAGTGACTACATCGGGG.....                                                                                                      | 1     | 23 |              |    |
| .....ATTGAAAGTGACTACATCGGG.....                                                                                                        | 104   | 21 |              |    |
| .....ATTGAAAGTGACTACATCGGGG.....                                                                                                       | 5     | 22 |              |    |
| .....ATTGAAAGTGACTACATCGGGT.....                                                                                                       | 1     | 23 |              |    |
| .....TTGAAAGTGACTACATCG.....                                                                                                           | 27    | 18 |              |    |
| .....TTGAAAGTGACTACATCGG.....                                                                                                          | 106   | 19 |              |    |
| .....TTGAAAGTGACTACATCGGG.....                                                                                                         | 375   | 20 |              |    |
| .....TTGAAAGTGACTACATCGGGG.....                                                                                                        | 92969 | 21 |              |    |
| .....TTGAAAGTGACTACATCGGGG.....                                                                                                        | 567   | 22 |              |    |
| .....TTGAAAGTGACTACATCGGGGTT.....                                                                                                      | 90    | 23 |              |    |
| .....TTGAAAGTGACTACATCGGGGTTCC.....                                                                                                    | 17    | 24 |              |    |
| .....TGAAGTGACTACATCGG.....                                                                                                            | 104   | 18 |              |    |
| .....TGAAGTGACTACATCGGG.....                                                                                                           | 103   | 19 |              |    |
| .....TGAAGTGACTACATCGGGG.....                                                                                                          | 5891  | 20 |              |    |
| .....TGAAGTGACTACATCGGGT.....                                                                                                          | 16858 | 21 |              |    |
| .....TGAAGTGACTACATCGGGGTT.....                                                                                                        | 171   | 22 |              |    |
| .....TGAAGTGACTACATCGGGGTTCC.....                                                                                                      | 10    | 23 |              |    |
| .....TGAAGTGACTACATCGGGGTTCC.....                                                                                                      | 6     | 24 |              |    |
| .....TGAAGTGACTACATCGGGGTTCCG.....                                                                                                     | 1     | 25 |              |    |
| .....GAAAGTGACTACATCGGG.....                                                                                                           | 6     | 18 |              |    |
| .....GAAAGTGACTACATCGGGG.....                                                                                                          | 82    | 19 |              |    |
| .....GAAAGTGACTACATCGGGGTT.....                                                                                                        | 162   | 20 |              |    |
| .....GAAAGTGACTACATCGGGGTT.....                                                                                                        | 4     | 21 |              |    |
| .....AAAGTGACTACATCGGGG.....                                                                                                           | 30    | 18 |              |    |
| .....AAAGTGACTACATCGGGGTT.....                                                                                                         | 5     | 19 |              |    |
| .....AAAGTGACTACATCGGGGTTCC.....                                                                                                       | 7     | 21 |              |    |
| .....AAGTGACTACATCGGGGTT.....                                                                                                          | 7     | 18 |              |    |
| .....AAGTGACTACATCGGGGTTCC.....                                                                                                        | 1     | 21 |              |    |
| .....ATATGATGAAGCGGAAACAGT.....                                                                                                        | 1     | 21 |              |    |

>ath-miR161.1\_MIMAT0000181\_Arabidopsis\_thaliana\_miR161.1

|                                                                                                                                        |      |    |              |    |
|----------------------------------------------------------------------------------------------------------------------------------------|------|----|--------------|----|
| CAGTACTTCTCTTTGCTTGATCTCGGTTTTTGACAGTTATTGGCTGATCAATGCATTGAAAGTACTACATCGGGTTCGGATTTTTTTGTTCTTCATATGATGAAGCGGAAACAGTAATCAACCTCGTTTATGTC |      |    | ath-miR161.1 | 21 |
| *****TGAAGTACTACATCGGGT*****                                                                                                           |      |    |              |    |
| .....TCTCTTTGCTTGATCTCGGTT.....                                                                                                        | 1    | 22 |              |    |
| .....CTCTTTGCTTGATCTCGGTT.....                                                                                                         | 1    | 21 |              |    |
| .....ATTGCGTCGATCAATGCA.....                                                                                                           | 1    | 18 |              |    |
| .....CGATCAATGCATTGAAAGTGA.....                                                                                                        | 1    | 21 |              |    |
| .....TCAATGCATTGAAAGTGA.....                                                                                                           | 6    | 18 |              |    |
| .....TCAATGCATTGAAAGTGAC.....                                                                                                          | 92   | 19 |              |    |
| .....TCAATGCATTGAAAGTGACT.....                                                                                                         | 142  | 20 |              |    |
| .....TCAATGCATTGAAAGTGACTA.....                                                                                                        | 4564 | 21 |              |    |
| .....TCAATGCATTGAAAGTGACTAC.....                                                                                                       | 5    | 22 |              |    |
| .....CAATGCATTGAAAGTGACT.....                                                                                                          | 5    | 18 |              |    |
| .....CAATGCATTGAAAGTGACT.....                                                                                                          | 4    | 19 |              |    |
| .....CAATGCATTGAAAGTGACTA.....                                                                                                         | 186  | 20 |              |    |
| .....AATGCATTGAAAGTGACTA.....                                                                                                          | 5    | 19 |              |    |
| .....TGCATTGAAAGTGACTACA.....                                                                                                          | 1    | 19 |              |    |
| .....TGCATTGAAAGTGACTACATC.....                                                                                                        | 1    | 21 |              |    |
| .....TGCATTGAAAGTGACTACATCGGG.....                                                                                                     | 68   | 24 |              |    |
| .....TGCATTGAAAGTGACTACATCGGGG.....                                                                                                    | 1    | 25 |              |    |
| .....GCATTGAAAGTGACTACATCGGG.....                                                                                                      | 1    | 23 |              |    |
| .....CATTGAAAGTGACTACATCGG.....                                                                                                        | 7    | 21 |              |    |
| .....CATTGAAAGTGACTACATCGGGG.....                                                                                                      | 1    | 23 |              |    |
| .....ATTGAAAGTGACTACATCGGG.....                                                                                                        | 104  | 21 |              |    |

```

.....ATTGAAAGTACTACATCGGGG..... 5 22
.....ATTGAAAGTACTACATCGGGT..... 1 23
.....TTGAAAGTACTACATCG..... 27 18
.....TTGAAAGTACTACATCGG..... 106 19
.....TTGAAAGTACTACATCGGG..... 375 20
.....TTGAAAGTACTACATCGGGG..... 92969 21
.....TTGAAAGTACTACATCGGGT..... 567 22
.....TTGAAAGTACTACATCGGGTT..... 90 23
.....TTGAAAGTACTACATCGGGTTC..... 17 24
.....TGAAAGTACTACATCGG..... 104 18
.....TGAAAGTACTACATCGGG..... 103 19
.....TGAAAGTACTACATCGGGG..... 5891 20
.....TGAAAGTACTACATCGGGT..... 16858 21
.....TGAAAGTACTACATCGGGTT..... 171 22
.....TGAAAGTACTACATCGGGTTC..... 10 23
.....TGAAAGTACTACATCGGGTTC..... 6 24
.....TGAAAGTACTACATCGGGTTC..... 1 25
.....GAAAGTACTACATCGGG..... 6 18
.....GAAAGTACTACATCGGGG..... 82 19
.....GAAAGTACTACATCGGGT..... 162 20
.....GAAAGTACTACATCGGGTT..... 4 21
.....AAAGTACTACATCGGGG..... 30 18
.....AAAGTACTACATCGGGT..... 5 19
.....AAAGTACTACATCGGGTTC..... 7 21
.....AAAGTACTACATCGGGT..... 7 18
.....AAGTACTACATCGGGTTC..... 1 21
.....AAGTACTACATCGGGTTC..... 1 21
.....ATATGATGAAGCGAAACAGT..... 1 21

```

>ath-miR163\_MIMAT0000184\_Arabidopsis\_thaliana\_miR163

```

TAGGAAGACGACGGTCGAAAGAACTGCGCAGTGCCTAAATCGTAGATGCTAAAGTCGTTGAAGAGGACTTGAACCTCGATATTATCCCCGTGTTTGTCCAGTTCTCTATAGTTGTGCCTGAAAATATGGTTTCTA
*****TTGAAGAGGACTTGAACCTCGAT*****

```

```

24
.....AATCGTAGATGCTAAAGTCG..... 1 20
.....TTGAAGAGGACTTGAAC..... 21 18
.....TTGAAGAGGACTTGAAC..... 10 19
.....TTGAAGAGGACTTGAACCTC..... 1 21
.....TTGAAGAGGACTTGAACCTCG..... 6 22
.....TTGAAGAGGACTTGAACCTCGA..... 90 23
.....TTGAAGAGGACTTGAACCTCGAT..... 172 24
.....TGAAGAGGACTTGAACCT..... 1 18
.....TGAAGAGGACTTGAACCTCG..... 1 21
.....TGAAGAGGACTTGAACCTCGA..... 4 22
.....TGAAGAGGACTTGAACCTCGAT..... 24 23
.....TGAAGAGGACTTGAACCTCGATA..... 6 24
.....GAAAGAGGACTTGAACCTCGAT..... 1 22
.....GAAAGAGGACTTGAACCTCGATA..... 1 23
.....GAAAGAGGACTTGAACCTCGAT..... 1 24
.....AAGTCTGATATTATCCCCGTG..... 9 22
.....TATTATCCCCGTGTTTGTG..... 2 19
.....TATTATCCCCGTGTTTGTG..... 2 21
.....TATTATCCCCGTGTTTGTCC..... 2 22
.....ATTATCCCCGTGTTTGTG..... 13 18
.....ATTATCCCCGTGTTTGTG..... 6 19
.....ATTATCCCCGTGTTTGTG..... 119 20
.....ATTATCCCCGTGTTTGTCC..... 967 21
.....ATTATCCCCGTGTTTGTCCA..... 6 22
.....TTATCCCCGTGTTTGTG..... 10 19
.....TTATCCCCGTGTTTGTCC..... 80 20
.....TATCCCCGTGTTTGTG..... 3 18
.....TATCCCCGTGTTTGTCC..... 32 19
.....TATCCCCGTGTTTGTCCAG..... 5 21
.....ATCCCCGTGTTTGTCC..... 15 18
.....ATCCCCGTGTTTGTCCA..... 1 19

```

>ath-miR164a\_MIMAT0000185\_Arabidopsis\_thaliana\_miR164a

```

AAGTTCTCATACTACAACGCCCTCATGTGCTTGGAAATCGGGTGAGAACTCCATGTTGGAAGCAGGGCAGCTGCAACCAACAAACAGAAATCGTCTATTGCTTATTTGCACGTACTTAACCTCTCCAACA
*****TGGAGAAGCAGGGCAGCTGCA*****

```

```

.....TTGAGAAGCAGGGCAGCTGCA..... 1 21
.....TTGAGAAGCAGGGCAGCTGCA..... 2 22
.....TTGAGAAGCAGGGCAGCTGCA..... 24 19
.....TTGAGAAGCAGGGCAGCTGCA..... 99 20
.....TTGAGAAGCAGGGCAGCTGCA..... 14686 21
.....TTGAGAAGCAGGGCAGCTGCA..... 7 22
.....TTGAGAAGCAGGGCAGCTGCA..... 1 23
.....GGAGAAGCAGGGCAGCTGCA..... 1 18
.....GGAGAAGCAGGGCAGCTGCA..... 4 19
.....GGAGAAGCAGGGCAGCTGCA..... 495 20
.....GAGAAGCAGGGCAGCTGCA..... 5 19
.....GAGAAGCAGGGCAGCTGCA..... 4 18
.....GAGAAGCAGGGCAGCTGCA..... 2 21
.....CACGTACTTAACCTCTCCAAC.....

```

>ath-miR164b\_MIMAT0000186\_Arabidopsis\_thaliana\_miR164b

```

CTCTCATCCCGCCAGTTATGTGTTGGAGAGAAATGATGAGGTTGTGATGAGCAAGTGGAGAAGCAGGGCAGCTGCATTAAGTCTATATACACTCTCACCACAAATCGTGTATATATGCGGAATTTGTGAT
*****TGGAGAAGCAGGGCAGCTGCA*****

```

```

.....AGATGGAGAAGCAGGGCAGCT..... 1 21
.....TTGAGAAGCAGGGCAGCTGCA..... 24 19
.....TTGAGAAGCAGGGCAGCTGCA..... 99 20
.....TTGAGAAGCAGGGCAGCTGCA..... 14686 21
.....TTGAGAAGCAGGGCAGCTGCA..... 31 22
.....TTGAGAAGCAGGGCAGCTGCA..... 10 23
.....GGAGAAGCAGGGCAGCTGCA..... 1 18
.....GGAGAAGCAGGGCAGCTGCA..... 4 19
.....GGAGAAGCAGGGCAGCTGCA..... 495 20
.....GGAGAAGCAGGGCAGCTGCA..... 1 21
.....GGAGAAGCAGGGCAGCTGCA..... 2 22
.....GAGAAGCAGGGCAGCTGCA..... 5 19
.....GAGAAGCAGGGCAGCTGCA..... 4 18
.....GAGAAGCAGGGCAGCTGCA..... 2 21
.....GCAGGGCAGCTGCACTACTAG.....

```

|                                                                                                                                    |       |    |                |
|------------------------------------------------------------------------------------------------------------------------------------|-------|----|----------------|
| .....CAGGGCACGTGCATTAAGC.....                                                                                                      | 1     | 21 |                |
| <br>                                                                                                                               |       |    |                |
| >ath-miR165a_MIMAT000187_Arabidopsis_thaliana_miR165a                                                                              |       |    |                |
| AGGATATTAGATATACATGTGTATGTTAATGATTCAAGTGATCATAGAGATATCTCGGACAGGCTTCATCCCCCAACATGTTATGCCTCTGATCACCATTATTTGTTACATTTTTTTTGTAACTACTTG  |       |    |                |
| *****TCGGACAGGCTTCATCCCC*****                                                                                                      |       |    | ath-miR165a 21 |
| .....TCCTGGACAGGCTTCATCC.....                                                                                                      | 1     | 18 |                |
| .....TCCTGGACAGGCTTCAT.....                                                                                                        | 1     | 19 |                |
| .....TCCTGGACAGGCTTCATCC.....                                                                                                      | 125   | 21 |                |
| .....CTCGGACAGGCTTCATCC.....                                                                                                       | 5     | 20 |                |
| .....CTCGGACAGGCTTCATCC.....                                                                                                       | 2     | 20 |                |
| .....CTCGGACAGGCTTCATCC.....                                                                                                       | 2     | 21 |                |
| .....CTCGGACAGGCTTCATCCCC.....                                                                                                     | 4     | 22 |                |
| .....TCGGACAGGCTTCATCC.....                                                                                                        | 234   | 18 |                |
| .....TCGGACAGGCTTCATCC.....                                                                                                        | 191   | 19 |                |
| .....TCGGACAGGCTTCATCC.....                                                                                                        | 107   | 20 |                |
| .....TCGGACAGGCTTCATCC.....                                                                                                        | 4725  | 21 |                |
| .....TCGGACAGGCTTCATCCCC.....                                                                                                      | 48    | 22 |                |
| .....TCGGACAGGCTTCATCCCC.....                                                                                                      | 4     | 23 |                |
| .....CGGACAGGCTTCATCC.....                                                                                                         | 3     | 18 |                |
| .....CGGACAGGCTTCATCC.....                                                                                                         | 2     | 19 |                |
| .....CGGACAGGCTTCATCC.....                                                                                                         | 159   | 20 |                |
| .....CGGACAGGCTTCATCCCC.....                                                                                                       | 3     | 21 |                |
| .....GGACAGGCTTCATCCCC.....                                                                                                        | 4     | 19 |                |
| .....GACAGGCTTCATCCCC.....                                                                                                         | 9     | 18 |                |
| <br>                                                                                                                               |       |    |                |
| >ath-miR166a_MIMAT000189_Arabidopsis_thaliana_miR166a                                                                              |       |    |                |
| TTCGATTAACAATCGAATTGAACCTTCAGATTCAGATTTGATTAGGTTTTAGCGTCTTCGGACAGGCTTCATCCCCCAATTGTTGCTCCCTGTTACTCCATATTTCTCTTCTTTCAAATTAGGTTTCAGA |       |    |                |
| *****TCGGACAGGCTTCATCCCC*****                                                                                                      |       |    | ath-miR166a 21 |
| .....TTGATTAGGTTTTAGCGTCT.....                                                                                                     | 1     | 21 |                |
| .....GTCTTCGGACAGGCTTCATCC.....                                                                                                    | 1     | 22 |                |
| .....GTCTTCGGACAGGCTTCATCC.....                                                                                                    | 3     | 24 |                |
| .....TCTTCGGACAGGCTTCATT.....                                                                                                      | 1     | 20 |                |
| .....TCTTCGGACAGGCTTCATCC.....                                                                                                     | 2     | 21 |                |
| .....TCTTCGGACAGGCTTCATCC.....                                                                                                     | 1     | 23 |                |
| .....CTTCGGACAGGCTTCATCC.....                                                                                                      | 3     | 23 |                |
| .....TTGGACAGGCTTCATT.....                                                                                                         | 1     | 18 |                |
| .....TTGGACAGGCTTCATCC.....                                                                                                        | 22    | 19 |                |
| .....TTGGACAGGCTTCATCC.....                                                                                                        | 82    | 20 |                |
| .....TTGGACAGGCTTCATCC.....                                                                                                        | 1762  | 21 |                |
| .....TTGGACAGGCTTCATCC.....                                                                                                        | 1740  | 22 |                |
| .....TTGGACAGGCTTCATCC.....                                                                                                        | 6     | 23 |                |
| .....TTGGACAGGCTTCATCC.....                                                                                                        | 1     | 24 |                |
| .....TCGGACAGGCTTCATCC.....                                                                                                        | 152   | 18 |                |
| .....TCGGACAGGCTTCATCC.....                                                                                                        | 557   | 19 |                |
| .....TCGGACAGGCTTCATCC.....                                                                                                        | 1193  | 20 |                |
| .....TCGGACAGGCTTCATCC.....                                                                                                        | 60176 | 21 |                |
| .....TCGGACAGGCTTCATCC.....                                                                                                        | 136   | 22 |                |
| .....TCGGACAGGCTTCATCC.....                                                                                                        | 25    | 23 |                |
| .....CGGACAGGCTTCATCC.....                                                                                                         | 21    | 18 |                |
| .....CGGACAGGCTTCATCC.....                                                                                                         | 35    | 19 |                |
| .....CGGACAGGCTTCATCC.....                                                                                                         | 2138  | 20 |                |
| .....CGGACAGGCTTCATCC.....                                                                                                         | 4     | 21 |                |
| .....GGACAGGCTTCATCC.....                                                                                                          | 40    | 19 |                |
| .....GACAGGCTTCATCC.....                                                                                                           | 123   | 18 |                |
| .....ACCAGGCTTCATCCCCCAA.....                                                                                                      | 1     | 21 |                |
| <br>                                                                                                                               |       |    |                |
| >ath-miR166b_MIMAT000190_Arabidopsis_thaliana_miR166b                                                                              |       |    |                |
| TCTAATAACAATCTCATTGAATACATTGATCTGATGATTAGGTTTTAGTGTCTCGGACAGGCTTCATCCCCCAATTATCACTCCCTACAATCGGAATTAAACGAAGAAGATTTGCCATTTTCAACTTTT  |       |    |                |
| *****TCGGACAGGCTTCATCCCC*****                                                                                                      |       |    | ath-miR166b 21 |
| .....TTGATTAGGTTTTAGTGTCT.....                                                                                                     | 1     | 21 |                |
| .....GTGTCTCGGACAGGCTTCATCC.....                                                                                                   | 1     | 27 |                |
| .....CGTGGACAGGCTTCATCC.....                                                                                                       | 1     | 22 |                |
| .....CGTGGACAGGCTTCATCC.....                                                                                                       | 1     | 23 |                |
| .....GTGGACAGGCTTCATCC.....                                                                                                        | 6     | 21 |                |
| .....TCGGACAGGCTTCATCC.....                                                                                                        | 152   | 18 |                |
| .....TCGGACAGGCTTCATCC.....                                                                                                        | 557   | 19 |                |
| .....TCGGACAGGCTTCATCC.....                                                                                                        | 1193  | 20 |                |
| .....TCGGACAGGCTTCATCC.....                                                                                                        | 60176 | 21 |                |
| .....TCGGACAGGCTTCATCC.....                                                                                                        | 136   | 22 |                |
| .....TCGGACAGGCTTCATCC.....                                                                                                        | 25    | 23 |                |
| .....CGGACAGGCTTCATCC.....                                                                                                         | 21    | 18 |                |
| .....CGGACAGGCTTCATCC.....                                                                                                         | 35    | 19 |                |
| .....CGGACAGGCTTCATCC.....                                                                                                         | 2138  | 20 |                |
| .....CGGACAGGCTTCATCC.....                                                                                                         | 4     | 21 |                |
| .....GGACAGGCTTCATCC.....                                                                                                          | 40    | 19 |                |
| .....GACAGGCTTCATCC.....                                                                                                           | 123   | 18 |                |
| .....ACCAGGCTTCATCCCCCAA.....                                                                                                      | 1     | 21 |                |
| <br>                                                                                                                               |       |    |                |
| >ath-miR166c_MIMAT000191_Arabidopsis_thaliana_miR166c                                                                              |       |    |                |
| GAAGAAGAGAATCACTCGAATTAATTTGAAGAACAATTAAGAAAACCTAGATGATTCTCGGACAGGCTTCATCCCCAATCACTACTATCGCTTTTCGCCCACTTTCTTCTTAGTCTTTTGTCTAGTTTCA |       |    |                |
| *****TCGGACAGGCTTCATCCCC*****                                                                                                      |       |    | ath-miR166c 21 |
| .....TCTGGACAGGCTTCATCC.....                                                                                                       | 1     | 21 |                |
| .....CTGGACAGGCTTCATCC.....                                                                                                        | 3     | 21 |                |
| .....CTGGACAGGCTTCATCC.....                                                                                                        | 8     | 22 |                |
| .....TCGGACAGGCTTCATCC.....                                                                                                        | 152   | 18 |                |
| .....TCGGACAGGCTTCATCC.....                                                                                                        | 557   | 19 |                |
| .....TCGGACAGGCTTCATCC.....                                                                                                        | 1193  | 20 |                |
| .....TCGGACAGGCTTCATCC.....                                                                                                        | 60176 | 21 |                |
| .....TCGGACAGGCTTCATCC.....                                                                                                        | 136   | 22 |                |
| .....TCGGACAGGCTTCATCC.....                                                                                                        | 1     | 23 |                |
| .....CGGACAGGCTTCATCC.....                                                                                                         | 21    | 18 |                |
| .....CGGACAGGCTTCATCC.....                                                                                                         | 35    | 19 |                |
| .....CGGACAGGCTTCATCC.....                                                                                                         | 2138  | 20 |                |
| .....CGGACAGGCTTCATCC.....                                                                                                         | 4     | 21 |                |
| .....GGACAGGCTTCATCC.....                                                                                                          | 40    | 19 |                |
| .....GACAGGCTTCATCC.....                                                                                                           | 123   | 18 |                |
| .....GACAGGCTTCATCC.....                                                                                                           | 123   | 18 |                |

```

>ath-miR166d_MIMAT000192_Arabidopsis_thaliana_miR166d
AGGTCATGAAGAAGATCGGTAGATTGATTCATTTAAAGAGTGAAATCCCTAAATGATTCTGGACCAGGCTTCATCCCCCAACGCATATCACACTTCTACTTAATCTTTTCTTTTGTCTATCTGCTTGTAT
*****TCGGACCAGGCTTCATCCCC*****
.....TCTGGACCAGGCTTCATCCC.....
.....CTGGACCAGGCTTCATCCC.....
.....CTGGACCAGGCTTCATCCCC.....
.....TCGGACCAGGCTTCATTC.....
.....TCGGACCAGGCTTCATCCC.....
.....TCGGACCAGGCTTCATCCCC.....
.....TCGGACCAGGCTTCATCCCC.....
.....TCGGACCAGGCTTCATCCCC.....
.....CGGACCAGGCTTCATCCC.....
.....CGGACCAGGCTTCATCCC.....
.....CGGACCAGGCTTCATCCCC.....
.....CGGACCAGGCTTCATCCCC.....
.....GACCAGGCTTCATCCCC.....
.....GACCAGGCTTCATCCCC.....
.....ACCAGGCTTCATCCCCCAA.....
ath-miR166d    21
1 21
3 21
8 22
152 18
557 19
1193 20
60176 21
136 22
25 23
21 18
35 19
2138 20
4 21
40 19
123 18
1 21

```

```

>ath-miR166e_MIMAT000193_Arabidopsis_thaliana_miR166e
TATATGCTCTCTTTATCATTAGCTATACATGAATGATCTTTACGGTAAAGGTCGGACCAGGCTTCATCCCCCAATTATCGCTTCGATCTTCTCTTTGAGTAAACATCTCCAGGTAGATTGGT
*****TCGGACCAGGCTTCATCCCC*****
.....TGACGTGGACCAGGCTTCATTC.....
.....TGACGTGGACCAGGCTTCATCCC.....
.....TGACGTGGACCAGGCTTCATCCC.....
.....GACGTGGACCAGGCTTCATCCCC.....
.....ACGTGGACCAGGCTTCATTC.....
.....ACGTGGACCAGGCTTCATCCC.....
.....CGTGGACCAGGCTTCATCCC.....
.....CGTGGACCAGGCTTCATCCCC.....
.....GTCGGACCAGGCTTCATCCC.....
.....TCGGACCAGGCTTCATTC.....
.....TCGGACCAGGCTTCATCCC.....
.....TCGGACCAGGCTTCATCCC.....
.....TCGGACCAGGCTTCATCCCC.....
.....TCGGACCAGGCTTCATCCCC.....
.....TCGGACCAGGCTTCATCCCC.....
.....TCGGACCAGGCTTCATCCCC.....
.....CGGACCAGGCTTCATCCC.....
.....CGGACCAGGCTTCATCCC.....
.....CGGACCAGGCTTCATCCCC.....
.....CGGACCAGGCTTCATCCCC.....
.....GACCAGGCTTCATCCCC.....
.....GACCAGGCTTCATCCCC.....
ath-miR166e    21
1 22
3 24
1 25
1 24
1 21
1 23
1 22
1 23
6 21
152 18
557 19
1193 20
60176 21
209 22
1 23
21 18
35 19
2138 20
6 21
40 19
123 18
3 19

```

```

>ath-miR166f_MIMAT000194_Arabidopsis_thaliana_miR166f
GCCTGGCTCGAGACCATTCAATCTCATGATCTCATGATTAACGATGATGATGTCGGACCAGGCTTCATCCCCCAACTTACACGTTTGTCTCAACTTCAAGACCAATCGTTAGCGATCACCTAAATTC
*****TCGGACCAGGCTTCATCCCC*****
.....ATGTCGGACCAGGCTTCATTC.....
.....GTCGGACCAGGCTTCATCCC.....
.....TCGGACCAGGCTTCATTC.....
.....TCGGACCAGGCTTCATCCC.....
.....TCGGACCAGGCTTCATCCCC.....
.....TCGGACCAGGCTTCATCCCC.....
.....TCGGACCAGGCTTCATCCCC.....
.....CGGACCAGGCTTCATCCC.....
.....CGGACCAGGCTTCATCCC.....
.....CGGACCAGGCTTCATCCCC.....
.....CGGACCAGGCTTCATCCCC.....
.....GACCAGGCTTCATCCCC.....
.....GACCAGGCTTCATCCCC.....
ath-miR166f    21
1 21
6 21
152 18
557 19
1193 20
60176 21
209 22
1 23
21 18
35 19
2138 20
6 21
40 19
123 18
3 19

```

```

>ath-miR166g_MIMAT000195_Arabidopsis_thaliana_miR166g
TGTTGGCTCGAGGTCATGGAGAGTAATTGTTAACCCTCAAACTCTAAATGATTCTGGACCAGGCTTCATCCCCCAACTTATTTATCGGATTTTCAGAAAATCTTTTACACATTTATATCACTTCTCGATT
*****TCGGACCAGGCTTCATCCCC*****
.....TCTGGACCAGGCTTCATCCC.....
.....CTGGACCAGGCTTCATCCCC.....
.....CTGGACCAGGCTTCATCCCC.....
.....TCGGACCAGGCTTCATTC.....
.....TCGGACCAGGCTTCATCCC.....
.....TCGGACCAGGCTTCATCCCC.....
.....TCGGACCAGGCTTCATCCCC.....
.....TCGGACCAGGCTTCATCCCC.....
.....TCGGACCAGGCTTCATCCCC.....
.....CGGACCAGGCTTCATCCC.....
.....CGGACCAGGCTTCATCCC.....
.....CGGACCAGGCTTCATCCCC.....
.....CGGACCAGGCTTCATCCCC.....
.....GACCAGGCTTCATCCCC.....
.....GACCAGGCTTCATCCCC.....
ath-miR166g    21
1 21
3 21
8 22
152 18
557 19
1193 20
60176 21
209 22
1 23
21 18
35 19
2138 20
6 21
40 19
123 18
3 19

```

```

>ath-miR167a_MIMAT000196_Arabidopsis_thaliana_miR167a
AAATCTCTCTTTCTTTCTTTCTGTACTGACGGTGAAGTCTATGGTGCACCGGACTGATGAAGCTGCCAGCATGATCTAATAGCTTTCTTTATCTTGTGTGTTTCTATGACGATGGTTAAGAGATCAGTCTCGATT
*****TGAAGCTGCCAGCATGATCT*****
.....TGATGAAGCTGCCAGCATGAT.....
.....GATGAAGCTGCCAGCATGAT.....
.....ATGAAGCTGCCAGCATGAT.....
.....ATGAAGCTGCCAGCATGAT.....
.....ATGAAGCTGCCAGCATGAT.....
.....TGAAGCTGCCAGCATGAT.....
.....TGAAGCTGCCAGCATGAT.....
.....TGAAGCTGCCAGCATGAT.....
.....TGAAGCTGCCAGCATGAT.....
.....TGAAGCTGCCAGCATGAT.....
.....TGAAGCTGCCAGCATGAT.....
ath-miR167a    21
3 21
1 21
2 20
20 21
19 22
713 18
3351 19
4507 20

```

```

.....TGAAGCTGCCAGCATGATCTA.....398295 21
.....TGAAGCTGCCAGCATGATCTAA.....184 22
.....TGAAGCTGCCAGCATGATCTAAT.....1 23
.....TGAAGCTGCCAGCATGATCTAATT.....3 24
.....GAAGCTGCCAGCATGATC.....81 18
.....GAAGCTGCCAGCATGATCT.....98 19
.....GAAGCTGCCAGCATGATCTA.....9023 20
.....GAAGCTGCCAGCATGATCTAA.....5 21
.....AAGCTGCCAGCATGATCT.....2 18
.....AAGCTGCCAGCATGATCTA.....70 19
.....AAGCTGCCAGCATGATCTAAT.....3 21
.....AGCTGCCAGCATGATCTA.....22 18

```

```

>ath-miR167b_MIMAT000197_Arabidopsis_thaliana_miR167b
TGTGAGATTGACAACTGTTGCTCAGTATTTGAAGCAAGTCCACAAGGGAACAAGTGAAGCTGCCAGCATGATCTATCTTTGGTTAAGAGATGAATGTGGAAACATATTGCTTAAACCAAGTAGGTCACTGCTCT
*****TGAAGCTGCCAGCATGATCTA*****ath-miR167b 21
.....AGTGAAGCTGCCAGCATGATCTA.....2 23
.....GTGAAGCTGCCAGCATGATCTA.....19 22
.....TGAAGCTGCCAGCATGAT.....713 18
.....TGAAGCTGCCAGCATGATC.....3351 19
.....TGAAGCTGCCAGCATGATCT.....4507 20
.....TGAAGCTGCCAGCATGATCTA.....398295 21
.....TGAAGCTGCCAGCATGATCTAT.....452 22
.....TGAAGCTGCCAGCATGATCTATC.....6 23
.....TGAAGCTGCCAGCATGATCTATCT.....291 24
.....GAAGCTGCCAGCATGATC.....81 18
.....GAAGCTGCCAGCATGATCT.....98 19
.....GAAGCTGCCAGCATGATCTA.....9023 20
.....GAAGCTGCCAGCATGATCTAT.....11 21
.....GAAGCTGCCAGCATGATCTATCT.....6 23
.....AAGCTGCCAGCATGATCT.....2 18
.....AAGCTGCCAGCATGATCTA.....70 19
.....AAGCTGCCAGCATGATCTAT.....1 20
.....AGCTGCCAGCATGATCTA.....22 18

```

```

>ath-miR168a_MIMAT000198_Arabidopsis_thaliana_miR168a
CTTCATATCCCTGTCTAAAGGATTATATGATAGTAGAGTCTCACCATCGGCTCGGATTCGCTTGGTGCAGTCCGGAACTTCGGCTGACACAGCTGTGACTTTAAACCTTTATGGTTGTGACAGGAGT
*****TCGCTTGGTGCAGTCCGGAA*****ath-miR168a 21
.....ATTGCTTGGTGCAGTCCGGAA.....1 23
.....ATTGCTTGGTGCAGTCCGGAAC.....4 24
.....TTGCTTGGTGCAGTCCGGAA.....26 21
.....TTGCTTGGTGCAGTCCGGAA.....15 22
.....TTGCTTGGTGCAGTCCGGAAC.....1 23
.....TTGCTTGGTGCAGTCCGGAACT.....1 24
.....TCGCTTGGTGCAGTCCGG.....80 18
.....TCGCTTGGTGCAGTCCGG.....111 19
.....TCGCTTGGTGCAGTCCGGAA.....946 20
.....TCGCTTGGTGCAGTCCGGAA.....95711 21
.....TCGCTTGGTGCAGTCCGGAACT.....6289 22
.....TCGCTTGGTGCAGTCCGGAAC.....73 23
.....TCGCTTGGTGCAGTCCGGAACTA.....45 24
.....CGCTTGGTGCAGTCCGG.....9 18
.....CGCTTGGTGCAGTCCGGAA.....27 19
.....CGCTTGGTGCAGTCCGGAA.....3648 20
.....CGCTTGGTGCAGTCCGGAAC.....807 21
.....CGCTTGGTGCAGTCCGGAACT.....37 22
.....CGCTTGGTGCAGTCCGGAACTA.....17 23
.....CGCTTGGTGCAGTCCGGAACTAA.....3 24
.....GCTTGGTGCAGTCCGGAA.....30 19
.....GCTTGGTGCAGTCCGGAAC.....7 20
.....GCTTGGTGCAGTCCGGAAC.....1 21
.....GCTTGGTGCAGTCCGGAACTA.....1 22
.....GCTTGGTGCAGTCCGGAACTA.....1 24
.....CTTGGTGCAGTCCGGAA.....161 18
.....CTTGGTGCAGTCCGGAAC.....12 19
.....CTTGGTGCAGTCCGGAACTA.....19 21
.....TTGCTGCAGTCCGGAAC.....2 18
.....TTGCTGCAGTCCGGAAC.....1 19
.....TGGTGCAGTCCGGAACTA.....1 20
.....TGGTGCAGTCCGGAACTA.....3 21
.....TGCAGTCCGGAACTA.....1 23

```

```

>ath-miR168b_MIMAT000199_Arabidopsis_thaliana_miR168b
TCACCTTTTCTGATGAGAGAGATGCGATGATTGTTAAAGTTACCGCGCTCGGATTCGCTTGGTGCAGTCCGGAACTGATTGGCTGACACCGACAGTGTCTTGTATGGTTGGTTGTGAGCTCCCTCTTGTA
*****TCGCTTGGTGCAGTCCGGAA*****ath-miR168b 21
.....TCTCGATTGCTTGGTGCAG.....4 21
.....TCTCGATTGCTTGGTGCAGG.....1 22
.....TCTCGATTGCTTGGTGCAGGTC.....9 24
.....ATTGCTTGGTGCAGTCCGGAA.....1 23
.....ATTGCTTGGTGCAGTCCGGAAC.....4 24
.....TTGCTTGGTGCAGTCCGGAA.....26 21
.....TTGCTTGGTGCAGTCCGGAA.....15 22
.....TTGCTTGGTGCAGTCCGGAAC.....1 23
.....TCGCTTGGTGCAGTCCGG.....80 18
.....TCGCTTGGTGCAGTCCGG.....111 19
.....TCGCTTGGTGCAGTCCGGAA.....946 20
.....TCGCTTGGTGCAGTCCGGAA.....95711 21
.....TCGCTTGGTGCAGTCCGGAAC.....6289 22
.....TCGCTTGGTGCAGTCCGGAACT.....8 23
.....TCGCTTGGTGCAGTCCGGAACTG.....4 24
.....CGCTTGGTGCAGTCCGG.....9 18
.....CGCTTGGTGCAGTCCGGAA.....27 19
.....CGCTTGGTGCAGTCCGGAA.....3648 20
.....CGCTTGGTGCAGTCCGGAAC.....807 21
.....CGCTTGGTGCAGTCCGGAACT.....1 22
.....GCTTGGTGCAGTCCGGAA.....30 19
.....GCTTGGTGCAGTCCGGAAC.....7 20
.....CTTGGTGCAGTCCGGAA.....161 18

```

```

.....CTTGGTCAGGTCGGGAAC..... 12 19
.....TTGGTCAGGTCGGGAAC..... 2 18
.....GGTCAGGTCGGGAAGT..... 2 18

```

```

>ath-miR169a_MIMAT000200_Arabidopsis_thaliana_miR169a
GTTTTCATATACAAGTGGGTATAGCTAGTGAACCGCAATGTGACGAAAGTAGTGTGCAGCAGGATGACTTCCGATTAAATGATCTTCTTTATACTCTATTAAAGCAATTAGTTCAAACCTTTTTTTTTTTT
*****CAGCCAAGGATGACTTGCCGA*****
.....TACAAGTGGGTATAGCTAGTG..... ath-miR169a 21
.....TACAAGTGGGTATAGCTAGTGA..... 1 21
.....ACCGAATGTGACGAAAGTAGTGT..... 1 22
.....CGAATGTGACGAAAGTAGTGT..... 1 24
.....TGACGAAAGTAGTGTGACGCC..... 12 21
.....TGACGAAAGTAGTGTGACGCCAAG..... 3 24
.....GACGAAAGTAGTGTGACGCCA..... 1 21
.....CGAAGTAGTGTGACGCCAAG..... 3 21
.....AAGTAGTGTGACGCCAAGGAT..... 1 21
.....AGTGTGCAGCAGGATGACT..... 1 21
.....GTGTGCAGCAGGATGACTT..... 2 21
.....TGTGCAGCAGGATGACTTG..... 1 21
.....TGCAGCAGGATGACTTG..... 1 19
.....TGCAGCAGGATGACTTGC..... 2 20
.....TGCAGCAGGATGACTTGC..... 355 21
.....TGCAGCAGGATGACTTGC..... 1 22
.....TGCAGCAGGATGACTTGC..... 1 23
.....TGCAGCAGGATGACTTGC..... 1 24
.....GCAGCAGGATGACTTGC..... 9 20
.....GCAGCAGGATGACTTGC..... 41 21
.....GCAGCAGGATGACTTGC..... 1 22
.....CAGCCAAGGATGACTTGC..... 12 18
.....CAGCCAAGGATGACTTGC..... 14 19
.....CAGCCAAGGATGACTTGC..... 278 20
.....CAGCCAAGGATGACTTGC..... 12916 21
.....CAGCCAAGGATGACTTGC..... 30 22
.....CAGCCAAGGATGACTTGC..... 3 23
.....CAGCCAAGGATGACTTGC..... 1 24
.....AGCCAAGGATGACTTGC..... 28 19
.....AGCCAAGGATGACTTGC..... 478 20
.....AGCCAAGGATGACTTGC..... 18 21
.....AGCCAAGGATGACTTGC..... 1 22
.....GCCAAGGATGACTTGC..... 34 18
.....GCCAAGGATGACTTGC..... 2 19
.....CCAAGGATGACTTGC..... 124 18
.....ATGACTTCCGATTAAATGA..... 1 21
.....TTATACTCTATTAAAGCAATT..... 1 21

```

```

>ath-miR172a_MIMAT000203_Arabidopsis_thaliana_miR172a
GATTCACATCTGTGATGACGGTGGTATTCACTCTCCACAAAGTTCTCTATGAAATGAGAATCTTGATGATGCTGCATCGGCAATCAAGACTATTCTTCCCTCTCTCTCCCTCTGATAGATTATTTGGA
*****AGAATCTTGATGATGCTGCAT*****
.....TGAGAATCTTGATGATGCTGC..... ath-miR172a 21
.....TGAGAATCTTGATGATGCTGCAT..... 8 21
.....GAGAATCTTGATGATGCTGCA..... 1 23
.....GAGAATCTTGATGATGCTGCA..... 9 21
.....GAGAATCTTGATGATGCTGCAT..... 93 22
.....AGAATCTTGATGATGCTGC..... 6 18
.....AGAATCTTGATGATGCTGC..... 55 19
.....AGAATCTTGATGATGCTGC..... 905 20
.....AGAATCTTGATGATGCTGCAT..... 43240 21
.....AGAATCTTGATGATGCTGCATC..... 34 22
.....AGAATCTTGATGATGCTGCATCGG..... 1 24
.....GAATCTTGATGATGCTGC..... 37 18
.....GAATCTTGATGATGCTGCA..... 92 19
.....GAATCTTGATGATGCTGCAT..... 29 20
.....AATCTTGATGATGCTGCA..... 3 18
.....AATCTTGATGATGCTGCAT..... 138 19
.....ATCTTGATGATGCTGCAT..... 6 18
.....ATGATGCTGCATCGGCAATC..... 7 20
.....GATGCTGCATCGGCAATC..... 1 18
.....CTGCATCGGCAATCAAGACT..... 1 21

```

```

>ath-miR172b_MIMAT000205_Arabidopsis_thaliana_miR172b
CCATTAAGATTACATGAAATGATAAATACCTAAATAGGGTTTATGATGATATGAGAATCTTGATGATGCTGCATCAACATCGAGCGCTACAATACCTAAAGCTTGAGAAAGAACTGAAGATATTGATTGA
*****AGAATCTTGATGATGCTGCAT*****
.....TGAGAATCTTGATGATGCTGC..... ath-miR172b 21
.....TGAGAATCTTGATGATGCTGCAT..... 8 21
.....GAGAATCTTGATGATGCTGCA..... 1 23
.....GAGAATCTTGATGATGCTGCA..... 9 21
.....GAGAATCTTGATGATGCTGCAT..... 93 22
.....AGAATCTTGATGATGCTGC..... 6 18
.....AGAATCTTGATGATGCTGC..... 55 19
.....AGAATCTTGATGATGCTGCA..... 905 20
.....AGAATCTTGATGATGCTGCAT..... 43240 21
.....AGAATCTTGATGATGCTGCATC..... 34 22
.....AGAATCTTGATGATGCTGCATCA..... 1 23
.....GAATCTTGATGATGCTGC..... 37 18
.....GAATCTTGATGATGCTGCA..... 92 19
.....GAATCTTGATGATGCTGCAT..... 29 20
.....AATCTTGATGATGCTGCA..... 3 18
.....AATCTTGATGATGCTGCAT..... 138 19
.....ATCTTGATGATGCTGCAT..... 6 18
.....CTTGATGATGCTGCATCAACA..... 1 21
.....TCAACAATCGAGGCTACAATAC..... 1 24

```

```

>ath-miR173_MIMAT000206_Arabidopsis_thaliana_miR173
GATCTTCTCTCACAAATAACCCAAATATATCAATCTACTGTGGTATTAAAGTACTTCCGCTGCAGAGAGAAATCACAGTGGTCAAAAAGTTGAGTTTCTTAAAGTCTTCTCTCTGATTCTCTGTGAAG
*****TTCGCTGCAGAGAGAAATCAC*****
.....TTAAGTACTTCCGCTGCAGA..... ath-miR173 22
.....TTCGCTGCAGAGAGAAATCAC..... 1 21
.....TTCGCTGCAGAGAGAAA..... 2 23
.....TTCGCTGCAGAGAGAAAT..... 249 18
.....TTCGCTGCAGAGAGAAAT..... 42 19

```

|                                 |      |    |
|---------------------------------|------|----|
| .....TTGCTTGCAGAGAAATC.....     | 27   | 20 |
| .....TTGCTTGCAGAGAAATCA.....    | 416  | 21 |
| .....TTGCTTGCAGAGAAATCAC.....   | 5030 | 22 |
| .....TTGCTTGCAGAGAAATCACA.....  | 21   | 23 |
| .....TTGCTTGCAGAGAAATCACAG..... | 1    | 24 |
| .....TCGCTTGCAGAGAAAT.....      | 2    | 18 |
| .....TCGCTTGCAGAGAAATCA.....    | 14   | 20 |
| .....TCGCTTGCAGAGAAATCAC.....   | 217  | 21 |
| .....TCGCTTGCAGAGAAATCACA.....  | 19   | 22 |
| .....CGCTTGCAGAGAAATCAC.....    | 6    | 20 |
| .....CGCTTGCAGAGAAATCACA.....   | 4    | 21 |
| .....GCCTTGCAGAGAAATCAC.....    | 2    | 19 |
| .....GCCTTGCAGAGAAATCACAG.....  | 12   | 21 |
| .....GCCTTGCAGAGAAATCACAGT..... | 2    | 22 |
| .....CTTGCAGAGAAATCAC.....      | 27   | 18 |
| .....CTTGCAGAGAAATCACAGT.....   | 2    | 21 |
| .....TTGCAGAGAAATCACA.....      | 1    | 18 |
| .....TTGCAGAGAAATCACAGT.....    | 1    | 21 |
| .....TTGCAGAGAAATCACAGTGG.....  | 8    | 22 |
| .....TTGCAGAGAAATCACAGTGGT..... | 4    | 23 |
| .....TGCAGAGAAATCACAGT.....     | 1    | 20 |
| .....TGCAGAGAAATCACAGTGG.....   | 1    | 21 |
| .....TGCAGAGAAATCACAGTGGT.....  | 2    | 22 |
| .....TGCAGAGAAATCACAGTGGT.....  | 1    | 20 |
| .....TCTGTGATTCTCTGTGAAG.....   | 1    | 20 |

>ath-miR167d\_MIMAT0000905\_Arabidopsis\_thaliana\_miR167d  
TCACAAGGAGCATTCTCTCTCATTCTTTTCAATTATCTATGTTGTTTTTAGAAGCTGAAGCTGCCAGCATGATCTGGTAATCGCTACATACGACATACACACACTAAACTTCTTTATAATTTATGCACACAT  
\*\*\*\*\*TGAAGCTGCCAGCATGATCTGG\*\*\*\*\*

|                                     |             |    |
|-------------------------------------|-------------|----|
| .....AGCTGAAGCTGCCAGCATGATC.....    | ath-miR167d | 22 |
| .....AGCTGAAGCTGCCAGCATGATCTGG..... | 6           | 22 |
| .....CTGAAGCTGCCAGCATGAT.....       | 1           | 25 |
| .....CTGAAGCTGCCAGCATGATCT.....     | 1           | 19 |
| .....CTGAAGCTGCCAGCATGATCT.....     | 2           | 20 |
| .....CTGAAGCTGCCAGCATGATCT.....     | 1           | 21 |
| .....CTGAAGCTGCCAGCATGATCTG.....    | 22          | 22 |
| .....TGAAGCTGCCAGCATGAT.....        | 713         | 18 |
| .....TGAAGCTGCCAGCATGATC.....       | 3351        | 19 |
| .....TGAAGCTGCCAGCATGATCT.....      | 4507        | 20 |
| .....TGAAGCTGCCAGCATGATCTG.....     | 218         | 21 |
| .....TGAAGCTGCCAGCATGATCTGG.....    | 3221        | 22 |
| .....TGAAGCTGCCAGCATGATCTGGT.....   | 17          | 23 |
| .....TGAAGCTGCCAGCATGATCTGGTA.....  | 1           | 24 |
| .....GAAGCTGCCAGCATGATC.....        | 81          | 18 |
| .....GAAGCTGCCAGCATGATCT.....       | 98          | 19 |
| .....GAAGCTGCCAGCATGATCTG.....      | 6           | 20 |
| .....GAAGCTGCCAGCATGATCTGG.....     | 99          | 21 |
| .....GAAGCTGCCAGCATGATCTGGT.....    | 2           | 22 |
| .....AAGCTGCCAGCATGATCTG.....       | 2           | 18 |
| .....AAGCTGCCAGCATGATCTGG.....      | 2           | 20 |
| .....CTGCCAGCATGATCTGGT.....        | 8           | 18 |

>ath-miR169c\_MIMAT0000907\_Arabidopsis\_thaliana\_miR169c  
AAGGTGTGAATGATTGTCTCATCTAAAGCTTGAATGGGAAAAGGCCATTGTTGTCAGCCAAAGGATGACTTCCGGTAGCTTGATTATGATTACTATATTGATTATATTATGGAGATGATGGTTATATAT  
\*\*\*\*\*CAGCCAAAGGATGACTTCCGG\*\*\*\*\*

|                                   |             |    |
|-----------------------------------|-------------|----|
| .....TTGAGCCAAAGGATGACTTCCG.....  | ath-miR169c | 21 |
| .....CAGCCAAAGGATGACTTCCG.....    | 2           | 21 |
| .....CAGCCAAAGGATGACTTCCG.....    | 12          | 18 |
| .....CAGCCAAAGGATGACTTCCG.....    | 14          | 19 |
| .....CAGCCAAAGGATGACTTCCG.....    | 278         | 20 |
| .....CAGCCAAAGGATGACTTCCG.....    | 504         | 21 |
| .....CAGCCAAAGGATGACTTCCG.....    | 89          | 22 |
| .....CAGCCAAAGGATGACTTCCGGTA..... | 3           | 23 |
| .....AGCCAAAGGATGACTTCCG.....     | 28          | 19 |
| .....AGCCAAAGGATGACTTCCG.....     | 83          | 20 |
| .....AGCCAAAGGATGACTTCCG.....     | 27          | 21 |
| .....AGCCAAAGGATGACTTCCGGTA.....  | 2           | 22 |
| .....GCCAAAGGATGACTTCCG.....      | 34          | 18 |
| .....GCCAAAGGATGACTTCCG.....      | 2           | 19 |
| .....CCAAGGATGACTTCCG.....        | 6           | 18 |
| .....CCAAGGATGACTTCCGGTA.....     | 1           | 20 |

>ath-miR169d\_MIMAT0000908\_Arabidopsis\_thaliana\_miR169d  
GATAATGAGAGTCACTAATTGTATCATAGAGCTTGCATGGAAAAATTAAGAAATGAGATTGAGCCAAAGGATGACTTCCGGATGTTATCAACAAATCTTAAGTATTTGGTTCGGCAAGTTGACCTTGGCTCTGTTTC  
\*\*\*\*\*TGAAGCCAAAGGATGACTTCCG\*\*\*\*\*

|                                   |             |    |
|-----------------------------------|-------------|----|
| .....ATTGAGCCAAAGGATGACTTCCG..... | ath-miR169d | 21 |
| .....ATTGAGCCAAAGGATGACTTCCG..... | 1           | 22 |
| .....TTGAGCCAAAGGATGACTTCCG.....  | 1           | 23 |
| .....TTGAGCCAAAGGATGACTTCCG.....  | 4           | 21 |
| .....TTGAGCCAAAGGATGACTTCCG.....  | 4           | 22 |
| .....TGAGCCAAAGGATGACTTCCG.....   | 1           | 18 |
| .....TGAGCCAAAGGATGACTTCCG.....   | 5           | 20 |
| .....TGAGCCAAAGGATGACTTCCG.....   | 1182        | 21 |
| .....TGAGCCAAAGGATGACTTCCG.....   | 2           | 22 |
| .....GAGCCAAAGGATGACTTCCG.....    | 14          | 20 |
| .....GAGCCAAAGGATGACTTCCG.....    | 4           | 21 |
| .....AGCCAAAGGATGACTTCCG.....     | 28          | 19 |
| .....AGCCAAAGGATGACTTCCG.....     | 478         | 20 |
| .....AGCCAAAGGATGACTTCCGAT.....   | 18          | 21 |
| .....GCCAAAGGATGACTTCCG.....      | 34          | 18 |
| .....GCCAAAGGATGACTTCCG.....      | 2           | 19 |
| .....CCAAGGATGACTTCCG.....        | 124         | 18 |
| .....CCAAGGATGACTTCCGATG.....     | 1           | 20 |
| .....GCAAGTTGACCTTGGCTCTG.....    | 1           | 21 |
| .....GCAAGTTGACCTTGGCTC.....      | 30          | 18 |
| .....GCAAGTTGACCTTGGCTC.....      | 59          | 19 |
| .....GCAAGTTGACCTTGGCTCTG.....    | 73          | 20 |
| .....GCAAGTTGACCTTGGCTCTG.....    | 141         | 21 |
| .....GCAAGTTGACCTTGGCTCTGTT.....  | 19          | 22 |
| .....CAAGTTGACCTTGGCTCTG.....     | 2           | 19 |
| .....CAAGTTGACCTTGGCTCTG.....     | 1           | 20 |

```

>ath-miR169e_MIMAT000909_Arabidopsis_thaliana_miR169e
ATGATGAGTACTAATAATGATCATAGAGCTTGCATGAAAAATAGAAAATGAGATTGAGCCAAGGATGACTTGCCGATTTCTCAACGAATCTTACTGATTATGGTATCCGGCAAGTTGACTTTGGCTGTGTTCC
*****TGAGCCAAGGATGACTTGCCG*****
.....ATTGAGCCAAGGATGACTTGCC.....
.....ATTGAGCCAAGGATGACTTGCCG.....
.....TTGAGCCAAGGATGACTTGCC.....
.....TTGAGCCAAGGATGACTTGCCG.....
.....TGAGCCAAGGATGACTTG.....
.....TGAGCCAAGGATGACTTGCC.....
.....TGAGCCAAGGATGACTTGCCG.....
.....TGAGCCAAGGATGACTTGCCGA.....
.....GAGCCAAGGATGACTTGCCG.....
.....GAGCCAAGGATGACTTGCCGA.....
.....AGCCAAGGATGACTTGCCG.....
.....AGCCAAGGATGACTTGCCGA.....
.....AGCCAAGGATGACTTGCCGAT.....
.....AGCCAAGGATGACTTGCCGAT.....
.....GCAAGGATGACTTGCCG.....
.....GCAAGGATGACTTGCCGA.....
.....CCAAGGATGACTTGCCGA.....
.....GCAAGTGTGCTTGGCTC.....
.....GCAAGTGTGCTTGGCTCT.....
.....GCAAGTGTGCTTGGCTCTG.....
.....GCAAGTGTGCTTGGCTCTGT.....
.....GCAAGTGTGCTTGGCTTGT.....
ath-miR169e 21
1 22
1 23
4 21
4 22
1 18
5 20
1182 21
2 22
14 20
4 21
28 19
478 20
18 21
1 22
34 18
2 19
124 18
3 18
2 19
4 20
14 21
1 22

```

```

>ath-miR169f_MIMAT000910_Arabidopsis_thaliana_miR169f
TTGTAATGGAGTCTTTGGTTGATCAGAGGCTTGCATGAAGAAATACGAATGGAATTGAGCCAAGGATGACTTGCCGGTTAAACCAACCGTTTATGACCATTGATTTGGTCTATTACAATCTGTTGATTCTGT
*****TGAGCCAAGGATGACTTGCCG*****
.....TGAAAGAAATACGAATGGA.....
.....TGAAAGAAATACGAATGGA.....
.....TGAAAGAAATACGAATGGAAT.....
.....GAAGAAATACGAATGGA.....
.....AATGGAATTGAGCCAAGGATG.....
.....ATGGAATTGAGCCAAGGATGA.....
.....ATTGAGCCAAGGATGACTTGCC.....
.....ATTGAGCCAAGGATGACTTGCCG.....
.....TTGAGCCAAGGATGACTTGCC.....
.....TTGAGCCAAGGATGACTTGCCG.....
.....TGAGCCAAGGATGACTTG.....
.....TGAGCCAAGGATGACTTGCC.....
.....TGAGCCAAGGATGACTTGCCG.....
.....TGAGCCAAGGATGACTTGCCGG.....
.....TGAGCCAAGGATGACTTGCCGGT.....
.....TGAGCCAAGGATGACTTGCCGGT.....
.....GAGCCAAGGATGACTTGCCG.....
.....GAGCCAAGGATGACTTGCCGG.....
.....AGCCAAGGATGACTTGCCG.....
.....AGCCAAGGATGACTTGCCGG.....
.....AGCCAAGGATGACTTGCCGGT.....
.....AGCCAAGGATGACTTGCCGGT.....
.....GCAAGGATGACTTGCCG.....
.....GCAAGGATGACTTGCCGG.....
.....CCAAGGATGACTTGCCGG.....
ath-miR169f 21
5 19
3 20
75 21
1 19
1 21
1 21
1 22
1 23
4 21
4 22
1 18
5 20
1182 21
1 22
1 23
6 24
14 20
2 21
28 19
83 20
27 21
9 22
34 18
2 19
6 18

```

```

>ath-miR169g_MIMAT000911_Arabidopsis_thaliana_miR169g
CGATGATGAGAGTCTTAGTTGATCAGAGGCTTGCATGAAGAAATAGAAATGAGGTTGAGCCAAGGATGACTTGCCGGTTTTTTACCAATGAATCTAATAACTGATTCTGGTGTCCGGCAAGTTGACCTGGCT
*****TGAGCCAAGGATGACTTGCCG*****
.....TTGAGCCAAGGATGACTTGCC.....
.....TTGAGCCAAGGATGACTTGCCG.....
.....TGAGCCAAGGATGACTTG.....
.....TGAGCCAAGGATGACTTGCC.....
.....TGAGCCAAGGATGACTTGCCG.....
.....TGAGCCAAGGATGACTTGCCGGT.....
.....GAGCCAAGGATGACTTGCCG.....
.....GAGCCAAGGATGACTTGCCGG.....
.....AGCCAAGGATGACTTGCCG.....
.....AGCCAAGGATGACTTGCCGG.....
.....AGCCAAGGATGACTTGCCGGG.....
.....GCAAGGATGACTTGCCG.....
.....GCAAGGATGACTTGCCGG.....
.....CCAAGGATGACTTGCCGG.....
ath-miR169g 21
4 21
4 22
1 18
5 20
1182 21
1 22
2 24
14 20
2 21
28 19
83 20
2 21
34 18
2 19
6 18

```

```

>ath-miR169h_MIMAT000913_Arabidopsis_thaliana_miR169h
TCATAAATACATAAATCATATAAGAGAAAATGGTACATGAAGAATGAGAACTTGTGTGAGCCAAGGATGACTTGCCGCTTTTACCAATATATATCAAGACTCACTGATCGATGATCTTAGAGTTGGTTGGTCCG
*****TAGCCAAGGATGACTTGCCG*****
.....GGTAGCCAAGGATGACTTGCC.....
.....GGTAGCCAAGGATGACTTGCC.....
.....GGTAGCCAAGGATGACTTGCCCT.....
.....GGTAGCCAAGGATGACTTGCCCTG.....
.....GTAGCCAAGGATGACTTGCCCT.....
.....GTAGCCAAGGATGACTTGCCCTG.....
.....TAGCCAAGGATGACTTGCC.....
.....TAGCCAAGGATGACTTGCCCT.....
.....TAGCCAAGGATGACTTGCCCTG.....
.....TAGCCAAGGATGACTTGCCCTG.....
.....AGCCAAGGATGACTTGCCCT.....
.....AGCCAAGGATGACTTGCCCTG.....
.....AGCCAAGGATGACTTGCCCTG.....
.....GCAAGGATGACTTGCCCT.....
.....GCAAGGATGACTTGCCCTG.....
.....CCAAGGATGACTTGCCCTG.....
.....CATATATATCAAGACTCACT.....
ath-miR169h 21
1 20
1 21
4 22
3 23
2 21
8 22
21 18
106 19
45 20
5086 21
23 22
6 19
49 20
2 21
1 18
11 18
1 19
1 21

```



```

>ath-miR169i_MIMAT000914_Arabidopsis_thaliana_miR169i
TGTGAGTGACACATTATTTAGAAGGAGATGTCAAAGATGAATAGAAGAATCATATTTGGTAGCCAAGGATGACTTGCCTGACTCTTGTGTAAAATGTTAGTGTCTGTTTGAAGTCACTAAGTTGTATCAAGCAAT
*****TAGCCAAGGATGACTTGCCTG*****
.....ATGAATAGAAGAATCATATTTGG.....
.....TGAATAGAAGAATCATATTTGG.....
.....GGTAGCCAAGGATGACTTGC.....
.....GGTAGCCAAGGATGACTTGC.....
.....GGTAGCCAAGGATGACTTGCCT.....
.....GGTAGCCAAGGATGACTTGCCTG.....
.....GTAGCCAAGGATGACTTGCCT.....
.....GTAGCCAAGGATGACTTGCCTG.....
.....GTAGCCAAGGATGACTTGCCTGA.....
.....TAGCCAAGGATGACTTGC.....
.....TAGCCAAGGATGACTTGCCT.....
.....TAGCCAAGGATGACTTGCCT.....
.....TAGCCAAGGATGACTTGCCTG.....
.....TAGCCAAGGATGACTTGCCTGA.....
.....TAGCCAAGGATGACTTGCCTGAC.....
.....AGCCAAGGATGACTTGCCT.....
.....AGCCAAGGATGACTTGCCTG.....
.....AGCCAAGGATGACTTGCCTGA.....
.....GCCAAGGATGACTTGCCT.....
.....GCCAAGGATGACTTGCCTGA.....
.....CCAAGGATGACTTGCCTG.....
.....CCAAGGATGACTTGCCTGA.....
.....CAAGGATGACTTGCCTGA.....
.....CAAGGATGACTTGCCTGA.....
.....CAAGGATGACTTGCCTGA.....
.....CAAGGATGACTTGCCTGA.....

ath-miR169i 21
1 23
10 22
1 20
1 21
4 22
3 23
2 21
8 22
1 23
21 18
106 19
45 20
5086 21
1092 22
6 23
6 19
49 20
13 21
1 18
1 20
11 18
4 19
1 18

```

```

>ath-miR169j_MIMAT000915_Arabidopsis_thaliana_miR169j
GAGTAATAAAGAGTATAATGAGGAAGAGGTCTAACATGGCGAAAAGAGCATGTTTAGTAGCCAAGGATGACTTGCCTGATCTTTTCACTCCATGATTTCAATTTGTAATTCATGGGTTTGGATTATTATACATCCA
*****TAGCCAAGGATGACTTGCCTG*****
.....TAATGAGGAAGAGGTCTAAC.....
.....AGTAGCCAAGGATGACTTGCCTG.....
.....GTAGCCAAGGATGACTTGCCT.....
.....GTAGCCAAGGATGACTTGCCTG.....
.....GTAGCCAAGGATGACTTGCCTGA.....
.....TAGCCAAGGATGACTTGC.....
.....TAGCCAAGGATGACTTGCCT.....
.....TAGCCAAGGATGACTTGCCT.....
.....TAGCCAAGGATGACTTGCCTG.....
.....TAGCCAAGGATGACTTGCCTGA.....
.....TAGCCAAGGATGACTTGCCTGAT.....
.....AGCCAAGGATGACTTGCCT.....
.....AGCCAAGGATGACTTGCCTG.....
.....AGCCAAGGATGACTTGCCTGA.....
.....AGCCAAGGATGACTTGCCTGAT.....
.....GCCAAGGATGACTTGCCT.....
.....GCCAAGGATGACTTGCCTGA.....
.....GCCAAGGATGACTTGCCTGAT.....
.....GCCAAGGATGACTTGCCTG.....
.....CCAAGGATGACTTGCCTG.....
.....CCAAGGATGACTTGCCTGA.....
.....CAAGGATGACTTGCCTGA.....
.....CAAGGATGACTTGCCTGA.....
.....CAAGGATGACTTGCCTGATC.....

ath-miR169j 21
1 22
1 23
2 21
8 22
1 23
21 18
106 19
45 20
5086 21
1092 22
4 23
1 25
6 19
49 20
13 21
1 22
1 18
1 20
1 22
11 18
4 19
1 18
1 20

```

```

>ath-miR169k_MIMAT000916_Arabidopsis_thaliana_miR169k
GCTGAGCTACACATTATTTAGAAGGAGATGTCAAAGATGAATAGGAGAACAATTTGGTAGCCAAGGATGACTTGCCTGCTCTGAACAAATGTCGATGCTGTTTGAAGTCACTAAGTTATACCAAGAAA
*****TAGCCAAGGATGACTTGCCTG*****
.....ATAGGAGAACAATTTGGTAG.....
.....GGTAGCCAAGGATGACTTGC.....
.....GGTAGCCAAGGATGACTTGC.....
.....GGTAGCCAAGGATGACTTGCCT.....
.....GGTAGCCAAGGATGACTTGCCTG.....
.....GTAGCCAAGGATGACTTGCCT.....
.....GTAGCCAAGGATGACTTGCCTG.....
.....TAGCCAAGGATGACTTGC.....
.....TAGCCAAGGATGACTTGCCT.....
.....TAGCCAAGGATGACTTGCCT.....
.....TAGCCAAGGATGACTTGCCTG.....
.....TAGCCAAGGATGACTTGCCT.....
.....TAGCCAAGGATGACTTGCCTG.....
.....AGCCAAGGATGACTTGCCT.....
.....AGCCAAGGATGACTTGCCTG.....
.....AGCCAAGGATGACTTGCCTGA.....
.....AGCCAAGGATGACTTGCCTGAT.....
.....GCCAAGGATGACTTGCCT.....
.....GCCAAGGATGACTTGCCTG.....
.....CCAAGGATGACTTGCCTG.....
.....CCAAGGATGACTTGCCTGA.....
.....CAAGGATGACTTGCCTG.....
.....CAAGGATGACTTGCCTG.....

ath-miR169k 21
2 22
1 20
1 21
4 22
3 23
2 21
8 22
21 18
106 19
45 20
5086 21
23 22
6 19
49 20
2 21
4 22
1 18
11 18
1 20
1 22
1 18
1 20
1 22
11 18
4 19
1 18

```

```

>ath-miR169l_MIMAT000917_Arabidopsis_thaliana_miR169l
AAAGAGAGTTAAATATAATGAAGAAGAGAGGTCTAAATGGCGAAAAGAGCATGTTTAAATAGCCAAGGATGACTTGCCTGATCTTTTCACTCCATGATTTCAATTTAAGTTCGTGGATTTGGATTATTATGCGTTTA
*****TAGCCAAGGATGACTTGCCTG*****
.....AATAGCCAAGGATGACTTGCCTG.....
.....TAGCCAAGGATGACTTGC.....
.....TAGCCAAGGATGACTTGCCT.....
.....TAGCCAAGGATGACTTGCCT.....
.....TAGCCAAGGATGACTTGCCTG.....
.....TAGCCAAGGATGACTTGCCTGA.....
.....TAGCCAAGGATGACTTGCCTGAT.....
.....TAGCCAAGGATGACTTGCCTGATCT.....
.....AGCCAAGGATGACTTGCCT.....
.....AGCCAAGGATGACTTGCCTG.....
.....AGCCAAGGATGACTTGCCTGA.....
.....AGCCAAGGATGACTTGCCTGAT.....
.....GCCAAGGATGACTTGCCT.....
.....GCCAAGGATGACTTGCCTGA.....
.....CCAAGGATGACTTGCCTG.....
.....CCAAGGATGACTTGCCTGA.....
.....CAAGGATGACTTGCCTGA.....
.....CAAGGATGACTTGCCTGA.....

ath-miR169l 21
2 23
21 18
106 19
45 20
5086 21
1092 22
4 23
1 25
6 19
49 20
13 21
1 22
1 18
1 20
1 22
11 18
4 19
1 18
1 20

```

```

.....CAAGGATGACTTGCCTGATC..... 1 20

>ath-miR169m_MIMAT000918_Arabidopsis_thaliana_miR169m
AGTGAGTGATACATTATTAGAAAGGAGAGTCAAAGATGAATAGAAGAATCATATTTGGTAGCCAAGGATGACTTGCCTGTTCTTTGAGTAAATGGGTTAGTGTCATGTTTGACAAGTGACTATAAGTTATATCAAGC
*****TAGCCAAGGATGACTTGCCTG*****
.....ATGAATAGAAGAATCATATTTGG..... 1 23
.....TGAATAGAAGAATCATATTTGG..... 10 22
.....GGTAGCCAAGGATGACTTGC..... 1 20
.....GGTAGCCAAGGATGACTTGC..... 1 21
.....GGTAGCCAAGGATGACTTGCCT..... 4 22
.....GGTAGCCAAGGATGACTTGCCTG..... 3 23
.....GTAGCCAAGGATGACTTGCCT..... 2 21
.....GTAGCCAAGGATGACTTGCCTG..... 8 22
.....TAGCCAAGGATGACTTGC..... 21 18
.....TAGCCAAGGATGACTTGCCT..... 106 19
.....TAGCCAAGGATGACTTGCCT..... 45 20
.....TAGCCAAGGATGACTTGCCTG..... 5086 21
.....TAGCCAAGGATGACTTGCCTGT..... 177 22
.....TAGCCAAGGATGACTTGCCTGTT..... 1 23
.....AGCCAAGGATGACTTGCCT..... 6 19
.....AGCCAAGGATGACTTGCCTG..... 49 20
.....AGCCAAGGATGACTTGCCTGT..... 2 21
.....GCCAAGGATGACTTGCCT..... 1 18
.....CCAAGGATGACTTGCCTG..... 11 18
.....ATGTTTGACAAGTGACTATAAGTTAT..... 1 26

>ath-miR169n_MIMAT000919_Arabidopsis_thaliana_miR169n
GAGTAATGAAGTGTATGATGAAGAAGAGAGTCTAACATGGCGGAAAGCGTCATGTTTAGTAGCCAAGGATGACTTGCCTGATCTTTTCGCCCTCCACGATTCAATTTCAAATTCATGCATTTTGATTATTATACCTTTT
*****TAGCCAAGGATGACTTGCCTG*****
.....AGAAGAGAGGCTAACATGG..... 1 20
.....GAGGTCTAACATGGCGGAAA..... 1 19
.....AGGTCTAACATGGCGGAAA..... 1 19
.....TGGCGGAAAGCGTCATGTT..... 1 20
.....TGGCGGAAAGCGTCATGTTAG..... 5 22
.....AGCGTCATGTTAGTAGCCAAGGA..... 1 24
.....AGTAGCCAAGGATGACTTGCCTG..... 1 23
.....GTAGCCAAGGATGACTTGCCT..... 2 21
.....GTAGCCAAGGATGACTTGCCTG..... 8 22
.....GTAGCCAAGGATGACTTGCCTGA..... 1 23
.....TAGCCAAGGATGACTTGC..... 21 18
.....TAGCCAAGGATGACTTGCCT..... 106 19
.....TAGCCAAGGATGACTTGCCT..... 45 20
.....TAGCCAAGGATGACTTGCCTG..... 5086 21
.....TAGCCAAGGATGACTTGCCTGA..... 1092 22
.....TAGCCAAGGATGACTTGCCTGAT..... 4 23
.....TAGCCAAGGATGACTTGCCTGATCT..... 1 25
.....AGCCAAGGATGACTTGCCT..... 6 19
.....AGCCAAGGATGACTTGCCTG..... 49 20
.....AGCCAAGGATGACTTGCCTGA..... 13 21
.....AGCCAAGGATGACTTGCCTGAT..... 1 22
.....GCCAAGGATGACTTGCCT..... 1 18
.....GCCAAGGATGACTTGCCTGA..... 1 20
.....GCCAAGGATGACTTGCCTGATC..... 1 22
.....CCAAGGATGACTTGCCTG..... 11 18
.....CCAAGGATGACTTGCCTGA..... 4 19
.....CAAGGATGACTTGCCTGA..... 1 18
.....CAAGGATGACTTGCCTGATC..... 1 20

>ath-miR171b_MIMAT000920_Arabidopsis_thaliana_miR171b
TATTAGTGGCGTTCAATCAAAATAGTCCTCTTAACCTATGGAGAACGGTGTGTTGATTGAGCCGTGCCAATATCACCGGTAACCAAAAATGGCAAGATAGTATTATAACCTAAAGGATGTATCATTTATCGT
*****TTGAGCCGTGCCAATATCACG*****
.....ATTAGTGGCGTTCAATCAAAAT..... 1 21
.....GATTGAGCCGTGCCAATATC..... 1 20
.....ATTGAGCCGTGCCAATATCAC..... 1 21
.....TTGAGCCGTGCCAATATC..... 5 18
.....TTGAGCCGTGCCAATATCA..... 23 19
.....TTGAGCCGTGCCAATATCAC..... 420 20
.....TTGAGCCGTGCCAATATCACG..... 513 21
.....TTGAGCCGTGCCAATATCACGC..... 8 22
.....TTGAGCCGTGCCAATATCACGG..... 1 23
.....TGAGCCGTGCCAATATCA..... 1 18
.....TGAGCCGTGCCAATATCAC..... 5 19
.....TGAGCCGTGCCAATATCACG..... 33 20
.....TGAGCCGTGCCAATATCACGC..... 1 21
.....GAGCCGTGCCAATATCAC..... 1 18

>ath-miR171c_MIMAT000921_Arabidopsis_thaliana_miR171c
ATATTGGTGGCGTTCAATCAGAAAACCGTACTCTTTGTTTAAAGATCGGTTTATTGATTGAGCCGTGCCAATATCACCGGTTTAAATAGTTTAAAGATTCTATGTTAGTTGATGTATCAATCAAGTATGATCAT
*****TTGAGCCGTGCCAATATCACG*****
ATATTGGTGGCGTTCAATC.....TTTATTGATTGAGCCGTGCC..... 3 19
.....TTTATTGATTGAGCCGTGCC..... 1 21
.....TGATTGAGCCGTGCCAATA..... 6 19
.....TGATTGAGCCGTGCCAATAT..... 1 20
.....TGATTGAGCCGTGCCAATATC..... 47 21
.....GATTGAGCCGTGCCAATATC..... 1 20
.....ATTGAGCCGTGCCAATATCAC..... 1 21
.....TTGAGCCGTGCCAATATC..... 5 18
.....TTGAGCCGTGCCAATATCA..... 23 19
.....TTGAGCCGTGCCAATATCAC..... 420 20
.....TTGAGCCGTGCCAATATCACG..... 513 21
.....TTGAGCCGTGCCAATATCACGC..... 8 22
.....TTGAGCCGTGCCAATATCACGG..... 1 23
.....TGAGCCGTGCCAATATCA..... 1 18
.....TGAGCCGTGCCAATATCAC..... 5 19
.....TGAGCCGTGCCAATATCACG..... 33 20
.....TGAGCCGTGCCAATATCACGC..... 1 21
.....GAGCCGTGCCAATATCAC..... 1 18

```

>ath-miR172d\_MIMAT000923\_Arabidopsis\_thaliana\_miR172d  
CAAGATTAGAAATCAGATTCTTATGGGTTTCCTTTGAGCCCTTATTTTTGGTTTGAGAATCTTGATGATGCTGACGGCAATTAATGGCTTACTTATCTAGGGCTTTTTTCCATTTTCATGTTGTTAAT  
\*\*\*\*\*AGAACTCTGATGATGCTGCAG\*\*\*\*\*  
.....TGAAATCTTGATGATGCTGC..... 8 21  
.....GAAATCTTGATGATGCTGC..... 9 21  
.....AGAATCTTGATGATGCTGC..... 6 18  
.....AGAATCTTGATGATGCTGC..... 55 19  
.....AGAATCTTGATGATGCTGC..... 905 20  
.....AGAATCTTGATGATGCTGCAG..... 25 21  
.....GAATCTTGATGATGCTGC..... 37 18  
.....GAATCTTGATGATGCTGC..... 92 19  
.....AATCTTGATGATGCTGC..... 3 18  
.....ATCTTGATGATGCTGCAGCGCA..... 1 23  
.....CTTGATGATGCTGCAGCGCA..... 1 21  
.....GATGATGCTGCAGCGCAATTA..... 1 23  
.....GATGCTGCAGCGCAATTAATGG..... 1 24  
.....GCTGCAGCGCAATTAATGG..... 1 21  
.....AGCGCAATTAATGGCTTACTTA..... 1 24  
.....AATGGCTTACTTATCTAGGGCTT..... 1 24

>ath-miR390a\_MIMAT000931\_Arabidopsis\_thaliana\_miR390a  
AATCGGTTTTATCTTCTAAGTCAACCCAAAAAACAAGTAGAGAAGATCTGTAAGCTCAGGAGGATAGCGCCATGATGATCACATTGTTATCTATTTTTGGCGCTATCCATCCTGAGTTTCATTGGCTCT  
\*\*\*\*\*AAGCTCAGGAGGATAGCGCC\*\*\*\*\*  
.....AGAACTGTAAGCTCAGGAGGA..... 1 24  
.....ATCTGTAAGCTCAGGAGGA..... 2 21  
.....TGTAAGCTCAGGAGGATAG..... 5 21  
.....GTAAGCTCAGGAGGATAG..... 1 20  
.....TAAAGCTCAGGAGGATAG..... 1 19  
.....AAAGCTCAGGAGGATAGCG..... 1 20  
.....AAAGCTCAGGAGGATAGCGCC..... 27 21  
.....AAAGCTCAGGAGGATAGCGCC..... 9 22  
.....AAAGCTCAGGAGGATAGCGCCATG..... 1 25  
.....AAGCTCAGGAGGATAGCG..... 6 18  
.....AAGCTCAGGAGGATAGCG..... 42 19  
.....AAGCTCAGGAGGATAGCGCC..... 100 20  
.....AAGCTCAGGAGGATAGCGCC..... 5411 21  
.....AAGCTCAGGAGGATAGCGCCA..... 38 22  
.....AAGCTCAGGAGGATAGCGCCAT..... 1 23  
.....AAGCTCAGGAGGATAGCGCCATG..... 10 24  
.....AGCTCAGGAGGATAGCG..... 1 18  
.....AGCTCAGGAGGATAGCGCC..... 13 19  
.....AGCTCAGGAGGATAGCGCC..... 114 20  
.....AGCTCAGGAGGATAGCGCCA..... 272 21  
.....GCTCAGGAGGATAGCGCC..... 2 19  
.....CTCAGGAGGATAGCGCC..... 3 18  
.....CTCAGGAGGATAGCGCCA..... 7 19  
.....CTCAGGAGGATAGCGCCATG..... 5 21  
.....TCAGGAGGATAGCGCCATGA..... 1 21  
.....CGCCATGATGATCACATTG..... 1 20  
.....CGCTATCCATCCTGAGTTTC..... 23 20  
.....CGCTATCCATCCTGAGTTCA..... 80 21  
.....CTATCCATCCTGAGTTCA..... 1 19

>ath-miR390b\_MIMAT000932\_Arabidopsis\_thaliana\_miR390b  
AAAGGAAGATGATACCTATGGATGTAATTTAGATTGAGTAGAGAAATAGCTATAAAGCTCAGGAGGATAGCGCCATGGCTCACCAGTGTGATGTTTTGTATATGCGTACATGTATATCTGTTGGCGCTATCC  
\*\*\*\*\*AAGCTCAGGAGGATAGCGCC\*\*\*\*\*  
.....TATAAAGCTCAGGAGGATAG..... 1 21  
.....TAAAGCTCAGGAGGATAG..... 1 19  
.....AAAGCTCAGGAGGATAGCG..... 1 20  
.....AAAGCTCAGGAGGATAGCGCC..... 27 21  
.....AAAGCTCAGGAGGATAGCGCC..... 9 22  
.....AAAGCTCAGGAGGATAGCGCCATG..... 1 25  
.....AAGCTCAGGAGGATAGCG..... 6 18  
.....AAGCTCAGGAGGATAGCG..... 42 19  
.....AAGCTCAGGAGGATAGCGCC..... 100 20  
.....AAGCTCAGGAGGATAGCGCC..... 5411 21  
.....AAGCTCAGGAGGATAGCGCCA..... 38 22  
.....AAGCTCAGGAGGATAGCGCCAT..... 1 23  
.....AAGCTCAGGAGGATAGCGCCATG..... 10 24  
.....AGCTCAGGAGGATAGCG..... 1 18  
.....AGCTCAGGAGGATAGCGCC..... 13 19  
.....AGCTCAGGAGGATAGCGCCA..... 114 20  
.....AGCTCAGGAGGATAGCGCCATG..... 272 21  
.....AGCTCAGGAGGATAGCGCCATGG..... 1 25  
.....GCTCAGGAGGATAGCGCC..... 2 19  
.....CTCAGGAGGATAGCGCC..... 3 18  
.....CTCAGGAGGATAGCGCCA..... 7 19  
.....CTCAGGAGGATAGCGCCATG..... 5 21  
.....CAGGAGGATAGCGCCATGCTCA..... 1 24

>ath-miR391\_MIMAT000933\_Arabidopsis\_thaliana\_miR391  
ATTACACATACAAGTGGCTTCTCTTCTATGTTTTAAAAGTCAAAATAGGATTTGCTTCGAGGAGATAGCGCCATCACCTCTTCAAGAAGTTAACTAGTGGTGACGGTATCTCTCTAGTAGCAATCCTTAT  
\*\*\*\*\*TTCCGAGGAGATAGCGCCA\*\*\*\*\*  
.....TTTGCTTCGAGGAGATAGC..... 2 22  
.....TTGCTTCGAGGAGATAGCG..... 3 22  
.....CTTCGAGGAGATAGCGCC..... 1 20  
.....CTTCGAGGAGATAGCGCC..... 19 21  
.....CTTCGAGGAGATAGCGCCA..... 2 22  
.....CTTCGAGGAGATAGCGCCATC..... 3 24  
.....TTCCGAGGAGATAGCG..... 52 18  
.....TTCCGAGGAGATAGCGCC..... 23 19  
.....TTCCGAGGAGATAGCGCC..... 1497 20  
.....TTCCGAGGAGATAGCGCCA..... 33985 21  
.....TTCCGAGGAGATAGCGCCAT..... 62 22  
.....TTCCGAGGAGATAGCGCCATC..... 60 23  
.....TTCCGAGGAGATAGCGCCATCA..... 197 24

|                                      |      |    |
|--------------------------------------|------|----|
| .....TTCCAGGAGAGATAGCCATCAC.....     | 6    | 25 |
| .....TCGAGGAGAGATAGCGCC.....         | 36   | 19 |
| .....TCGAGGAGAGATAGCGCA.....         | 1249 | 20 |
| .....TCGAGGAGAGATAGCGCCAT.....       | 3    | 21 |
| .....TCGAGGAGAGATAGCGCCATC.....      | 14   | 22 |
| .....TCGAGGAGAGATAGCGCCATCA.....     | 21   | 23 |
| .....TCGAGGAGAGATAGCGCCATCAC.....    | 128  | 24 |
| .....CGAGGAGAGATAGCGCC.....          | 6    | 18 |
| .....CGAGGAGAGATAGCGCCA.....         | 82   | 19 |
| .....CGAGGAGAGATAGCGCCATCAC.....     | 6    | 23 |
| .....GCAGGAGAGATAGCGCCA.....         | 20   | 18 |
| .....GCAGGAGAGATAGCGCCAT.....        | 1    | 19 |
| .....CAGGAGAGATAGCGCCATCA.....       | 1    | 20 |
| .....CAGGAGAGATAGCGCCATCAC.....      | 7    | 21 |
| .....CAGGAGAGATAGCGCCATCACCTC.....   | 1    | 24 |
| .....AGGAGAGATAGCGCCATCA.....        | 1    | 19 |
| .....AGGAGAGATAGCGCCATCACCC.....     | 2    | 21 |
| .....GGAGAGATAGCGCCATCACCC.....      | 1    | 20 |
| .....GAGAGATAGCGCCATCACCC.....       | 2    | 19 |
| .....AGAGATAGCGCCATCACCT.....        | 2    | 19 |
| .....AACTAGTGGTACGGTATCTCTCC.....    | 1    | 24 |
| .....AGTGGTACGGTATCTCTCT.....        | 1    | 18 |
| .....AGTGGTACGGTATCTCTCTA.....       | 1    | 22 |
| .....AGTGGTACGGTATCTCTCTACGTA.....   | 1    | 26 |
| .....GTGGTACGGTATCTCTCTC.....        | 1    | 18 |
| .....GTGGTACGGTATCTCTCTCC.....       | 2    | 19 |
| .....GTGGTACGGTATCTCTCTCT.....       | 2    | 20 |
| .....GTGGTACGGTATCTCTCTCTACG.....    | 1    | 23 |
| .....TTGGTACGGTATCTCTCTCTAC.....     | 4    | 21 |
| .....TTGGTACGGTATCTCTCTCTACGTAG..... | 1    | 25 |
| .....GGTACGGTATCTCTCTCTAC.....       | 2    | 20 |
| .....GGTACGGTATCTCTCTCTACG.....      | 2    | 21 |
| .....GGTACGGTATCTCTCTCTACGTA.....    | 13   | 23 |
| .....GGTACGGTATCTCTCTCTACGTAG.....   | 9    | 24 |
| .....GTGACGGTATCTCTCTCTACGTA.....    | 1    | 22 |
| .....GTGACGGTATCTCTCTCTACGTAG.....   | 5    | 23 |
| .....GTGACGGTATCTCTCTCTACGTAGC.....  | 86   | 24 |
| .....GTGACGGTATCTCTCTCTACGTAGCA..... | 1    | 25 |
| .....TGACGGTATCTCTCTCTACGTAG.....    | 1    | 22 |
| .....TGACGGTATCTCTCTCTACGTAGC.....   | 1    | 23 |
| .....TGACGGTATCTCTCTCTACGTAGCA.....  | 3    | 24 |
| .....GACGGTATCTCTCTCTACGTAGC.....    | 1    | 22 |
| .....ACGGTATCTCTCTCTACGT.....        | 3    | 18 |
| .....ACGGTATCTCTCTCTACGTAG.....      | 10   | 19 |
| .....ACGGTATCTCTCTCTACGTAGC.....     | 12   | 20 |
| .....ACGGTATCTCTCTCTACGTAGCA.....    | 1576 | 21 |
| .....ACGGTATCTCTCTCTACGTAGCA.....    | 4    | 22 |
| .....GTATCTCTCTCTACGTAGC.....        | 1    | 18 |
| .....GTATCTCTCTCTACGTAGCAAT.....     | 1    | 21 |

>ath-miR393a\_MIMAT000934\_Arabidopsis\_thaliana\_miR393a  
TTTTAGAGTGAGAGAGATAGAGGTTGAACAATCTTATAGCACTAGAGAAAGGATCCAAAGGATCGCATTGCTCTAATTAAGTGAATCTCCCATATTTCTTTATAATTGGCAATAAATCACAAAAATTT  
\*\*\*\*\*TCCAAAGGATCGCATTGATC\*\*\*\*\*  
.....GGAAGGATCCAAAGGATCGC..... ath-miR393a 22  
.....TCCAAAGGATCGCATTG..... 2 21  
.....TCCAAAGGATCGCATTGA..... 19 18  
.....TCCAAAGGATCGCATTGAT..... 78 19  
.....TCCAAAGGATCGCATTGAT..... 33 20  
.....TCCAAAGGATCGCATTGATC..... 197 21  
.....TCCAAAGGATCGCATTGATCC..... 229 22  
.....TCCAAAGGATCGCATTGATCCT..... 2 23  
.....CCAAAGGATCGCATTGA..... 3 18  
.....CCAAAGGATCGCATTGATC..... 3 20  
.....CCAAAGGATCGCATTGATCC..... 3 21

>ath-miR393b\_MIMAT000935\_Arabidopsis\_thaliana\_miR393b  
AAAAACCATTTGCCACCTTGAAGAGAGAGAGTTCTTACAGCACTAGAGAAAGGATCCAAAGGATCGCATTGCTCTAATTAAGTGAATTTATCCCAATAATTGTTTTTTTCTCTCAATGAAAGATGG  
\*\*\*\*\*TCCAAAGGATCGCATTGATC\*\*\*\*\*  
.....AACTAGAGAAAGGATCCAAAGGAT..... ath-miR393b 22  
.....TCCAAAGGATCGCATTG..... 2 24  
.....TCCAAAGGATCGCATTGA..... 19 18  
.....TCCAAAGGATCGCATTGAT..... 78 19  
.....TCCAAAGGATCGCATTGAT..... 33 20  
.....TCCAAAGGATCGCATTGATC..... 197 21  
.....TCCAAAGGATCGCATTGATCC..... 229 22  
.....TCCAAAGGATCGCATTGATCCT..... 2 23  
.....CCAAAGGATCGCATTGA..... 3 18  
.....CCAAAGGATCGCATTGATC..... 3 20  
.....CCAAAGGATCGCATTGATCC..... 3 21

>ath-miR396a\_MIMAT000944\_Arabidopsis\_thaliana\_miR396a  
CCTCACTCCCTTTCCACAATTAGGTTTCGTCTGCTACATGACCCTCTCTGTATTCTTCCACAGCTTCTTGAACGCAAAACCTTCTCAGATTTTCTTTTCTTTTCTTTGATATCTTACGCATAAAATAGTGT  
\*\*\*\*\*TCCACAGCTTCTTGAACG\*\*\*\*\*  
.....CAATTAGGTTTCGTCTGCTC..... ath-miR396a 21  
.....CTCTGTATTCTTCCACAGCTT..... 1 21  
.....TGTATTCTTCCACAGCTTCTT..... 2 21  
.....TCCACAGCTTCTTGAAC..... 1 21  
.....TCCACAGCTTCTTGAAC..... 50 18  
.....TCCACAGCTTCTTGAAC..... 213 19  
.....TCCACAGCTTCTTGAAC..... 38 20  
.....TCCACAGCTTCTTGAAC..... 4598 21  
.....TCCACAGCTTCTTGAACG..... 38 22  
.....TCCACAGCTTCTTGAACGCA..... 1 23  
.....TCCACAGCTTCTTGAACGCAA..... 6 24  
.....TCCACAGCTTCTTGAAC..... 13 18  
.....TCCACAGCTTCTTGAAC..... 1 19  
.....TCCACAGCTTCTTGAACG..... 246 20  
.....CCACAGCTTCTTGAACG..... 14 19  
.....CCACAGCTTCTTGAACG..... 1 20  
.....CCACAGCTTCTTGAACGCA..... 47 21  
.....CACAGCTTCTTGAACG..... 15 18

```

.....ACAGCTTCTTGAAGTCA..... 1 19
.....ACAGCTTCTTGAAGTCAAA..... 4 20
.....ACAGCTTCTTGAAGTCAAA..... 5 21

```

```

>ath-miR396b_MIMAT000945_Arabidopsis_thaliana_miR396b
ATTCTCTTAAGTTAATAGTTTCAGAGAAAGGAGAAGTGAAGATCTGGTCATCTTTCCACAGCTTCTTGAAGTCTTTTTCATTCCATTGTTTTTCTTAAACAAAAGTAAAGAGAAAAAACTTAAAG
*****TTCCACAGCTTCTTGAAGTCTT*****
.....TTCCACAGCTTCTTGAAG..... 1 19
.....TTCCACAGCTTCTTGAAG..... 2 18
.....TTCCACAGCTTCTTGAAG..... 213 19
.....TTCCACAGCTTCTTGAAG..... 38 20
.....TTCCACAGCTTCTTGAAG..... 367 21
.....TTCCACAGCTTCTTGAAG..... 4 22
.....TTCCACAGCTTCTTGAAG..... 1 24
.....TTCCACAGCTTCTTGAAG..... 13 18
.....TTCCACAGCTTCTTGAAG..... 1 19
.....TTCCACAGCTTCTTGAAG..... 9 20
.....TTCCACAGCTTCTTGAAG..... 1 19
.....TTCCACAGCTTCTTGAAG..... 1 18

```

```

>ath-miR400_MIMAT0001001_Arabidopsis_thaliana_miR400
TGGCGATTCTTGGTGCACACAAAAGGTAATCTTAACTGTTCTGAGGATGTTTATGAGAGTATTATAAGTCACTACATTTGGTAAGCAAAGTGTGTTTCTCAAACGAAGTACTTATGATAATCTCATGAAT
*****TATGAGAGTATTATAAGTCACT*****
.....TTTATGAGAGTATTATAAGTCA..... 2 21
.....TTTATGAGAGTATTATAAGTCA..... 54 21
.....TATGAGAGTATTATAAGTCA..... 3 18
.....TATGAGAGTATTATAAGTCA..... 1 19
.....TATGAGAGTATTATAAGTCA..... 22 20
.....TATGAGAGTATTATAAGTCA..... 3156 21
.....TATGAGAGTATTATAAGTCA..... 6 22
.....TATGAGAGTATTATAAGTCA..... 12 23
.....TATGAGAGTATTATAAGTCA..... 1 19
.....TATGAGAGTATTATAAGTCA..... 38 20
.....TATGAGAGTATTATAAGTCA..... 1 19
.....TATGAGAGTATTATAAGTCA..... 9 22
.....TATGAGAGTATTATAAGTCA..... 4 18
.....TATGAGAGTATTATAAGTCA..... 2 20
.....TATGAGAGTATTATAAGTCA..... 24 21
.....TATGAGAGTATTATAAGTCA..... 1 20
.....TATGAGAGTATTATAAGTCA..... 3 21
.....TATGAGAGTATTATAAGTCA..... 1 24
.....TATGAGAGTATTATAAGTCA..... 1 18
.....TATGAGAGTATTATAAGTCA..... 18 21
.....TATGAGAGTATTATAAGTCA..... 1 19
.....TATGAGAGTATTATAAGTCA..... 1 20
.....TATGAGAGTATTATAAGTCA..... 8 21
.....TATGAGAGTATTATAAGTCA..... 1 19
.....TATGAGAGTATTATAAGTCA..... 3 20

```

```

>ath-miR402_MIMAT0001003_Arabidopsis_thaliana_miR402
AGATAAGTTTGAAGTGCATAGTGGCAGCTTCTTGTGTTGTTAAACCATATTTTCATGATTCGAGGCCTATTAAACCTCTGTACATCTGCTTTTGAAGTGTGCTATTTTCTGAAATCTTCTGCTCAATTTCCAAC
*****TTCCGAGGCCTATTAAACCTCT*****
.....TTCCGAGGCCTATTAAACCTCT..... 1 22
.....TTCCGAGGCCTATTAAACCTCT..... 2 18
.....TTCCGAGGCCTATTAAACCTCT..... 1 19
.....TTCCGAGGCCTATTAAACCTCT..... 1 20
.....TTCCGAGGCCTATTAAACCTCT..... 1 21
.....TTCCGAGGCCTATTAAACCTCT..... 46 22
.....TTCCGAGGCCTATTAAACCTCT..... 1 23
.....TTCCGAGGCCTATTAAACCTCT..... 2 25
.....TTCCGAGGCCTATTAAACCTCT..... 3 21
.....TTCCGAGGCCTATTAAACCTCT..... 1 18

```

```

>ath-miR403_MIMAT0001004_Arabidopsis_thaliana_miR403
TAATTCACAGGCTTATGTAAGAGATTCTTTAAACCTCTTAATCTTGTGTTGAGGATTAGATTCACGCCAAACCTGTAATCTGTCTTTGATTTTACCAGATCTGTCTCGATTGGAATCGATCTCTTTGAT
*****TTAGATTACGCCAAACCTG*****
.....GGATTAGATTCACGCCAAAC..... 1 18
.....GGATTAGATTCACGCCAAAC..... 1 21
.....GGATTAGATTCACGCCAAAC..... 6 23
.....GGATTAGATTCACGCCAAAC..... 3 24
.....GATTAGATTCACGCCAAAC..... 1 21
.....GATTAGATTCACGCCAAAC..... 1 22
.....GATTAGATTCACGCCAAAC..... 2 23
.....TTAGATTACGCCAAAC..... 151 18
.....TTAGATTACGCCAAAC..... 68 19
.....TTAGATTACGCCAAAC..... 174 20
.....TTAGATTACGCCAAAC..... 1217 21
.....TTAGATTACGCCAAAC..... 153 22
.....TTAGATTACGCCAAAC..... 1 23
.....TAGATTACGCCAAAC..... 3 18
.....TAGATTACGCCAAAC..... 19 20
.....TAGATTACGCCAAAC..... 2 18
.....TAGATTACGCCAAAC..... 18 19
.....GATTACGCCAAAC..... 4 18
.....GATTACGCCAAAC..... 1 20
.....ATTACGCCAAAC..... 1 18
.....ATTACGCCAAAC..... 2 20

```

```

>ath-miR406_MIMAT0001009_Arabidopsis_thaliana_miR406
TAGATTGATTTTCTTTTATTAGTTCTTAAATTTGATTGAGACAGTAATCTCAATAGAGTCTATTGTAATCCAGAATCCGAAAGAAACGAATCAAAAAAAGAGCTTCTCATGATAAAATGATTA
*****TAGAATGCTATTGTAATCAG*****
.....ATTGAGACAGTAATCTCAAA..... 2 24
.....AGAATGCTATTGTAATCAG..... 1 24
.....AGAATGCTATTGTAATCAG..... 1 22
.....ACGAGTCTTATGATAAAATCGA..... 1 24

```

>ath-miR407\_MIMAT0001010\_Arabidopsis\_thaliana\_miR407  
TTAAAAAATCGCCAACCTTTAAAAATGGGACAAAAAATGCCCACTCTGAAATGCTTTAAATCATATACCTTTGGTACTCTTCAGAAAAGATAAAAAGCAAGATTGTAATCAACAAAATCTTGTCTGTGA  
\*\*\*\*\*TTTAAATCATATACCTTTGGT\*\*\*\*\*  
.....AAAAATGGGACAAAAAATCGCCA.....  
.....AAATGGGACAAAAAATCGCCAAC.....  
.....CGCCAATCTCTGAAATGTCA.....  
.....ATCAACAAAATCTTGTCTGTGA

ath-miR407 21  
1 24  
1 24  
1 20  
1 23

>ath-miR408\_MIMAT0001011\_Arabidopsis\_thaliana\_miR408  
ACAAGCAGAGCATGGATTGAGTTTACTAAAACATTAACGACTCTGTTTGGTCTACCCATGCACTGCCTCTCCCTGGCTCCCTCTTTTCTCTATATTCTCTCTCTCTTCATTTCACAGCTTCATGGAAAT  
\*\*\*\*\*ATGCACTGCCTCTCCCTGGC\*\*\*\*\*  
.....CATGCACTGCCTCTCCCTGGCT.....  
.....ATGCACTGCCTCTCCCT.....  
.....ATGCACTGCCTCTCCCTG.....  
.....ATGCACTGCCTCTCCCTGG.....  
.....ATGCACTGCCTCTCCCTGGC.....  
.....ATGCACTGCCTCTCCCTGGCT.....  
.....ATGCACTGCCTCTCCCTGGCTC.....  
.....TGCACCTCTCCCTGG.....  
.....TGCACCTCTCCCTGGCT.....  
.....TGCACCTCTCCCTGGCT.....  
.....TGCACCTCTCCCTGGCT.....  
.....TGCACCTCTCCCTGGCTC.....  
.....GCACTGCCTCTCCCTGGC.....

ath-miR408 21  
3 24  
2 18  
2 19  
6 20  
344 21  
1 22  
1 23  
1 19  
8 20  
5 21  
4 22  
6 19

>ath-miR172e\_MIMAT0001019\_Arabidopsis\_thaliana\_miR172e  
GAGATGGTCCCTTCCTCGCTCTCGATCCGAGAAAAGGTTCTTATCAGTGGAAATCTTGATGCTGCATCAGCAAACATCGCTACTCTGTGCACTTCTTTGATCTCTAGTGAAGAGAGTAA  
\*\*\*\*\*GGAATCTTGATGCTGCAT\*\*\*\*\*  
.....GTGGAAATCTTGATGCTGCA.....  
.....GGAATCTTGATGCTGCAT.....  
.....GGAATCTTGATGCTGCAT.....  
.....GAACTTGATGCTGCAT.....  
.....GAATCTTGATGCTGCAT.....  
.....GAATCTTGATGCTGCAT.....  
.....GAATCTTGATGCTGCAT.....  
.....AATCTTGATGCTGCAT.....  
.....AATCTTGATGCTGCAT.....  
.....ATCTTGATGCTGCAT.....

ath-miR172e 21  
1 23  
2 20  
153 21  
37 18  
92 19  
29 20  
3 18  
138 19  
6 18

>ath-miR447a\_MIMAT0002113\_Arabidopsis\_thaliana\_miR447a  
TTTTTCTAGCACTCAAGTCTCGAGTTGATCATGTTTGTATTCTTGAGACATATTGGGGACGAGATGTTTTGTTGACTCGATATAAAGAGGGCTTTATGGAGAAATTGTAGTATTATATCGAGAGTGGCTC  
\*\*\*\*\*TTGGGGACGAGATGTTTTGTTG\*\*\*\*\*  
.....TGAGACATATTGGGGACGAG.....  
.....TTGGGGACGAGATGTTTTGTT.....  
.....TTGGGGACGAGATGTTTTGT.....  
.....TTGGGGACGAGATGTTTTGTT.....  
.....TTGGGGACGAGATGTTTTGTTG.....  
.....TTGGGGACGAGATGTTTTGTTGA.....  
.....TTGGGGACGAGATGTTTTGTT.....  
.....TTGGGGACGAGATGTTTTGTT.....  
.....TTGGGGACGAGATGTTTTGTT.....  
.....TTGGGGACGAGATGTTTTGTTG.....  
.....TTGGGGACGAGATGTTTTGTTGA.....  
.....TTGGGGACGAGATGTTTTGTTGAC.....  
.....TTTTGTTGACTCGATATAAGA.....  
.....GACTCGATATAAAGAGGGCT.....  
.....ACTCGATATAAAGAGGGCT.....  
.....ACTCGATATAAAGAGGGCT.....  
.....ACTCGATATAAAGAGGGCT.....  
.....TTATGGAAGAAATTGTAGTA.....  
.....TTATGGAAGAAATTGTAGTAT.....  
.....TATGGAAGAAATTGTAGT.....  
.....TATGGAAGAAATTGTAGTATT.....  
.....ATGGAAGAAATTGTAGTATT.....  
.....AAGAAATTGTAGTATTATATA.....  
.....AATTGTAGTATTATATATCGA.....

ath-miR447a 22  
1 22  
4 22  
3 20  
1 21  
34 22  
3 23  
2 19  
1 20  
30 21  
2 22  
2 23  
1 21  
8 21  
1 19  
2 20  
28 21  
1 20  
11 21  
2 18  
27 21  
1 20  
2 21  
1 21

>ath-miR447b\_MIMAT0002114\_Arabidopsis\_thaliana\_miR447b  
TGTTTTCTAGCCAGCCCAAGTCTCGAGTTGATCATTGTTGTATTCTGACACATATTGGGGACGAGATGTTTTGTTGACTCGATATAAAGAGGGCTTTATGGAGAAATTGTAGTATTATATGAGAAATGGCTC  
\*\*\*\*\*TTGGGGACGAGATGTTTTGTTG\*\*\*\*\*  
.....TTGGGGACGAGATGTTTTGTT.....  
.....TTGGGGACGAGATGTTTTGT.....  
.....TTGGGGACGAGATGTTTTGTT.....  
.....TTGGGGACGAGATGTTTTGTTG.....  
.....TTGGGGACGAGATGTTTTGTTGA.....  
.....TTGGGGACGAGATGTTTTGT.....  
.....TTGGGGACGAGATGTTTTGTT.....  
.....TTGGGGACGAGATGTTTTGTTG.....  
.....TTGGGGACGAGATGTTTTGTTGA.....  
.....TTTTGTTGACTCGATATAAGA.....  
.....GACTCGATATAAAGAGGGCT.....  
.....ACTCGATATAAAGAGGGCT.....  
.....ACTCGATATAAAGAGGGCT.....  
.....ACTCGATATAAAGAGGGCT.....  
.....TTATGGAAGAAATTGTAGTA.....  
.....TTATGGAAGAAATTGTAGTAT.....  
.....TATGGAAGAAATTGTAGT.....  
.....TATGGAAGAAATTGTAGTATT.....  
.....ATGGAAGAAATTGTAGTATT.....  
.....AAGAAATTGTAGTATTATATA.....

ath-miR447b 22  
4 22  
3 20  
1 21  
34 22  
3 23  
2 19  
1 20  
30 21  
2 22  
2 23  
1 21  
8 21  
1 19  
2 20  
28 21  
1 20  
11 21  
2 18  
27 21  
1 20  
2 21

>ath-miR472\_MIMAT0003931\_Arabidopsis\_thaliana\_miR472  
TGTTGATTGTAGGTTTGTGTTGCAAGTGTGAGATCGCAAGATTGAGTAAGATTTCCTACTCCGCCATACCACATACACCTAATCTGAGTCCATCTGATGGTACTACTGGAGTCCAAACTAAT  
\*\*\*\*\*TTTTCTACTCCGCCATAC\*\*\*\*\*  
.....ATTTTCTACTCCGCCATAC.....  
.....TTTTCTACTCCGCCAT.....  
.....TTTTCTACTCCGCCATACC.....  
.....TTTTCTACTCCGCCATAC.....

ath-miR472 22  
1 21  
1 19  
12 22  
1 20

```

.....TTTTCTACTCGGCCATACC..... 11 21
.....TTTCTACTCGGCCATACC..... 2 20
.....TTCTACTCGGCCATACC..... 2 19
.....TCCTACTCGGCCATACC..... 1 18
.....TCCTACTCGGCCATACCATAC..... 1 22
.....TACTCGGCCATACCATACAT..... 1 21
.....TACTCGGCCATACCATACATA..... 49 22
.....TACTCGGCCATACCATACATAC..... 1 23
.....ACTCGGCCATACCATACAT..... 1 20
.....CGGCCATACCATACATACACC..... 3 22
.....ATACATACACCTAATCCT..... 1 18
.....ATACATACACCTAATCCTG..... 1 19
.....ATACATACACCTAATCCTGA..... 5 20
.....ATACATACACCTAATCCTGAG..... 303 21
.....ATACATACACCTAATCCTGAGT..... 1 22
.....TACATACACCTAATCCTGAG..... 1 20
.....ACATACACCTAATCCTGAG..... 7 19

```

```

>ath-miR775_MIMAT0003934_Arabidopsis_thaliana_miR775
TTTCAACATTCCAATATTTCAACTTCGAATACCCAATATTTGGTTTGTCAAAGACATTTTCATGCTAGCAGTCCCAATGTTAAATCAACTGATAATTTGGAAATTAATGTGATAAAGATTGCAACTTTTATTT
*****
.....ATATTTGGTTTGTCAAAGACATT..... ath-miR775 20
.....TTTGGTTTGTCAAAGACATT..... 4 24
.....TTTGGTTTGTCAAAGACATTTTC..... 2 21
.....TTTGGTTTGTCAAAGACATTTC..... 3 24
.....TTTCGATGCTAGCAGTG..... 3 19
.....TTTTCGATGCTAGCAGTGC..... 2 20
.....TTTTCGATGCTAGCAGTGCC..... 38 21
.....TTTTCGATGCTAGCAGTGCCA..... 115 22
.....TTTTCGATGCTAGCAGTGCCAA..... 466 23
.....TTTTCGATGCTAGCAGTGCCAAAT..... 5 24
.....TTTCGATGCTAGCAGTGCC..... 6 20
.....TTTCGATGCTAGCAGTGCCA..... 32 21
.....TTTCGATGCTAGCAGTGCCAA..... 68 22
.....TTTCGATGCTAGCAGTGCC..... 12 19
.....TTTCGATGCTAGCAGTGCCA..... 1630 20
.....TTTCGATGCTAGCAGTGCCA..... 454 21
.....TTTCGATGCTAGCAGTGCCAAAT..... 73 22
.....TCGATGCTAGCAGTGCC..... 1 18
.....TCGATGCTAGCAGTGCCA..... 60 19
.....TCGATGCTAGCAGTGCCAA..... 11 20
.....TCGATGCTAGCAGTGCCAAAT..... 6 21
.....CGATGCTAGCAGTGCCA..... 33 18
.....CGATGCTAGCAGTGCCA..... 5 19
.....CGATGCTAGCAGTGCCAAAT..... 1 20
.....GATGCTAGCAGTGCCA..... 3 18
.....GATGCTAGCAGTGCCAAAT..... 1 19
.....TCTAGCAGTGCCAAATGTTAAA..... 1 22

```

```

>ath-miR777_MIMAT0003936_Arabidopsis_thaliana_miR777
ATTTGTAAGCAAAAGTTTATAATAGTGCCTGCTGATCACTTAATCTTAACCTAATACGCTTGGATTTGCTGCTTCTCGGGAAAAATCTCTTTGTAACCTAATCTTTATGTACTACTAAAAATCTCATGTTGA
*****
.....TTAACTAATACGCTTGGATG..... ath-miR777 22
.....TTAACTAATACGCTTGGATTT..... 1 20
.....AATACGCTTGGATTTGCTTGC..... 1 22
.....ATACGCTTGGATTTGCTTGC..... 8 22
.....TACGCTTGGATTTGCTTGC..... 2 18
.....TACGCTTGGATTTGCTTGC..... 3 19
.....TACGCTTGGATTTGCTTGC..... 1 20
.....TACGCTTGGATTTGCTTGC..... 6 21
.....TACGCTTGGATTTGCTTGC..... 85 22
.....TACGCTTGGATTTGCTTGC..... 1 23
.....TACGCTTGGATTTGCTTGC..... 4 25
.....ACGCTTGGATTTGCTTGC..... 2 21

```

```

>ath-miR829.1_MIMAT0004245_Arabidopsis_thaliana_miR829.1
TTGTACTTTGAAGCTTTGATTTGAACCTGTCAATTTGATCAAAAGCTTCTAAATCTTGAAGCTCTGATACCAATGATGGAATCAATTAAGCTTCAAGGTAGTAGTCATCTTGGCAGAGAAAAAGAAAGCACTTCGAGTT
*****
.....AGCTCTGATACCAATGATGGAAT..... ath-miR829.1 24
.....TGAAGCTCTGATACCAATGATGG..... 3 24
.....GAAGCTCTGATACCAATGATGGA..... 2 24
.....AAGCTCTGATACCAATGATGGAA..... 1 24
.....AGCTCTGATACCAATGATGGAA..... 1 23
.....AGCTCTGATACCAATGATGGAAT..... 7 24
.....ATTAAAGCTTCAAGGTAGTAGTCA..... 1 24

```

```

>ath-miR840_MIMAT0004262_Arabidopsis_thaliana_miR840
GACTCGGGTCTCGTAAAGCAGGTGATTCACCAATTTAGGTTTACATCCACAGTGTGGAAGACACTGAAGGACCTAACTAACAAGGTAACGGCTCAGTGTGCGGGTATTACACTCGGTTAATGTCTGAATGCGGATAAT
*****
.....TGAAGACACTGAAGGACCTAAAC..... ath-miR840 22
.....ACACTGAAGGACCTAAACTA..... 1 24
.....ACACTGAAGGACCTAAACTA..... 1 20
.....ACACTGAAGGACCTAAACTAAC..... 23 22
.....CACTGAAGGACCTAAACTAAC..... 2 21

```

```

>ath-miR843_MIMAT0004265_Arabidopsis_thaliana_miR843
GCCTAGCAGCGAATGCCAACAACCTCGCGTATTCTGAAAACCTCATATCTATTTCTTTAGGTCGAGCTTCATTGGAACCAATGGTGGCTCATCCATCTATTACTAAAGCTATACAGCAGGTGACAAGCCATCAT
*****
.....TTTAGGTCGAGCTTCATTGGA..... ath-miR843 21
.....TTTAGGTCGAGCTTCATTGG..... 15 20
.....TTTAGGTCGAGCTTCATTGGA..... 801 21
.....TTTAGGTCGAGCTTCATTGGAA..... 3 22
.....TTTAGGTCGAGCTTCATTGG..... 1 19
.....TTTAGGTCGAGCTTCATTGGAA..... 60 20
.....TTTAGGTCGAGCTTCATTGGAA..... 252 21
.....TTTAGGTCGAGCTTCATTGGAA..... 5 22
.....TAGGTCGAGCTTCATTGGA..... 28 19

```

```

.....TAGGTCGAGCTTCATTGGAA.....10 20
.....TAGGTCGAGCTTCATTGGAAC.....5 21
.....AGGTCGAGCTTCATTGGA.....1 18
.....AGGTCGAGCTTCATTGGAA.....1 19
.....AGGTCGAGCTTCATTGGAAC.....1 20
.....AGGTCGAGCTTCATTGGAAC.....1 21
.....AGGTCGAGCTTCATTGGAACAAA.....1 24

```

```

>ath-miR848_MIMAT0004270_Arabidopsis_thaliana_miR848
ATCTCATGTCAAATAAGGAAAAGAGGAAACCAAGGTATGTTCTCATCTACCTCTTTGACATGGGACTGCCTAAGCTAAAGGCTGGCATGTTATCACATCTTCTTTATTGTCGCAACCACTTTATCCTTATCA
*****TGCATGGGACTGCCTAAGCTA*****
.....TCATGTCAAATAAGGAAAAGAGG.....ath-miR848 22
.....TTGACATGGGACTGCCTAAGC.....1 26
.....TGACATGGGACTGCCTAAG.....4 21
.....TGACATGGGACTGCCTAAG.....1 19
.....TGACATGGGACTGCCTAAGCT.....1 21
.....TGACATGGGACTGCCTAAGCTA.....67 22
.....GACATGGGACTGCCTAAGCTA.....1 21
.....GACATGGGACTGCCTAAGCTAA.....1 22
.....CATGGGACTGCCTAAGCTAAAGGC.....3 24
.....ATGGGACTGCCTAAGCTAAAGGCT.....1 24
.....TGGGACTGCCTAAGCTAAAG.....1 20
.....TGGGACTGCCTAAGCTAAAGG.....2 22
.....TGGGACTGCCTAAGCTAAAGGCT.....1 23
.....TGGGACTGCCTAAGCTAAAGGCTT.....17 24
.....GGGACTGCCTAAGCTAAAGGCTT.....1 23

```

```

>ath-miR850_MIMAT0004272_Arabidopsis_thaliana_miR850
CTTTCTCACGTTTTAGATAGTGTATGTTATTTCTTACTATAGAACTGTCAGTAAGATCCGGACTACAACAAAGCAGCTTACTACTATATCTTTGCGATAATCAATAGATTCTTAAACATCGTAAAGG
*****TAAGATCCGGACTACAACAAAG*****
.....AACCTGTGACGTAAGATCCGGACTA.....ath-miR850 22
.....TGTGACGTAAGATCCGGAC.....3 25
.....TGTGACGTAAGATCCGGACT.....1 19
.....TGTGACGTAAGATCCGGACTAC.....11 22
.....TGTGACGTAAGATCCGGACTACA.....1 23
.....TGTGACGTAAGATCCGGACTACAAC.....1 25
.....TCAGTAAGATCCGGACT.....2 18
.....TCAGTAAGATCCGGACTA.....3 19
.....TCAGTAAGATCCGGACTAC.....8 20
.....TCAGTAAGATCCGGACTACA.....64 21
.....TCAGTAAGATCCGGACTACAA.....246 22
.....TCAGTAAGATCCGGACTACAAC.....11 23
.....CAGTAAGATCCGGACTACA.....2 20
.....CAGTAAGATCCGGACTACA.....10 21
.....CAGTAAGATCCGGACTACAAC.....5 22
.....CAGTAAGATCCGGACTACAAC.....1 23
.....CTAAGATCCGGACTACA.....2 18
.....TAAGATCCGGACTACAAC.....2 19
.....TAAGATCCGGACTACAACAA.....1 20
.....TAAGATCCGGACTACAACAAAG.....20 22
.....TAAGATCCGGACTACAACAAAGC.....1 23
.....AAGATCCGGACTACAAC.....1 18
.....AAGATCCGGACTACAACAA.....1 19
.....AAGATCCGGACTACAACAAAG.....6 21
.....AAGATCCGGACTACAACAAAGC.....22 22
.....ATCCGGACTACAACAAAGC.....1 19
.....GACTACAACAAAGCAGCTTACTC.....1 24
.....AACAAAGCAGCTTACTCTAC.....9 21

```

```

>ath-miR852_MIMAT0004275_Arabidopsis_thaliana_miR852
GATATTGCATGGAGTATGCTTCTACTTCTAGGAGATGCGTTTATGAAATATCAAGAAGATAAGCGCCTTAGTTCAGAGATAAGCGCCTTATTCACAAAATGCATAAGGTTGATTCTTTGTTAGGTTTATCCAGC
*****AAGATAAGCGCCTTAGTTCG*****
.....ATATCAAGAAGATAAGCGCC.....ath-miR852 21
.....TCAAGAAGATAAGCGCCTTA.....1 21
.....AAGAAGATAAGCGCCTTAGTT.....5 21
.....AGAAGATAAGCGCCTTAG.....1 18
.....AGAAGATAAGCGCCTTAGTTC.....2 21
.....AAGATAAGCGCCTTAGTTC.....2 19
.....AAGATAAGCGCCTTAGTTCG.....71 21
.....AAGATAAGCGCCTTAGTTCCTGA.....51 22
.....AAGATAAGCGCCTTAGTTCCTGAA.....4 23
.....AAGATAAGCGCCTTAGTTCCTGAAG.....1 24
.....AGATAAGCGCCTTAGTTC.....1 18
.....AGATAAGCGCCTTAGTTCCTGA.....33 21
.....AGATAAGCGCCTTAGTTCCTGAA.....1 22

```

```

>ath-miR860_MIMAT0004304_Arabidopsis_thaliana_miR860
TAGTCCAACTATTGAAGTACTAGTACACAGCTCTAATAAGCTGATGGGTAAGTAGTTCATAGATTGGACTATGATATATAAATTTGACTAAGAGATAAACTAGAGAAATGGAATAAAGAAATGAGAAACGGTATTAG
*****TCAATAGATTGGACTATGAT*****
.....TCTAATAAGCTGATGGGTA.....ath-miR860 21
.....AGCTGATGGGTAAGTAGTTCATAG.....1 22
.....CTGATGGGTAAGTAGTTCATAG.....1 26
.....TGTGGTAAGTAGTTCATAG.....1 22
.....TGGGTAAGTAGTTCATAGATTGG.....1 24
.....AAGTAGTTCATAGATTGGAC.....1 21
.....GTTCAATAGATTGGACTA.....1 18
.....GTTCAATAGATTGGACTATGAT.....1 23
.....TCAATAGATTGGACTATGTT.....2 19
.....TCAATAGATTGGACTATGTA.....1 20
.....TCAATAGATTGGACTATGAT.....24 21
.....CAATAGATTGGACTATGTA.....2 19
.....AATAGATTGGACTATGATAT.....2 21
.....AATAGATTGGACTATGATATTA.....2 24
.....ATAGATTGGACTATGATATTT.....10 21
.....ATAGATTGGACTATGATATTA.....1 22
.....TAGATTGGACTATGATATTAAT.....2 24
.....AGATTGGACTATGATATTT.....1 19
.....AGATTGGACTATGATATTA.....18 21

```



```

.....GATGGACTATGTATATTA.. 1 20
.....GATTGGACTATGTATATTA.. 1 21
.....TGGACTATGTATATTAAT.. 1 19

```

```

>ath-miR861-3p_MIMAT0004306_Arabidopsis_thaliana_miR861-3p
AATATCGCTCAATGAGTCGCTCTCTTGAGAAGCATTTTGGAGTGAAGATGTTCTCATGGATATGCTTCAAGGACTCTTTCAACAATGGTACTTCTTAATACTGGGATGTGAGAGGTAACATGATATTA
*****GATGGATATGCTTCAAGGAC*****
.....CATGGATATGCTTCAAG..... 2 21
.....CATGGATATGCTTCAAGGAC..... 4 24
.....TGATGGATATGCTTCAAGGAC..... 1 22
.....GATGGATATGCTTCAAGGAC..... 4 21
.....ATGGATATGCTTCAAGGAC..... 1 20

```

```

>ath-miR863-5p_MIMAT0004310_Arabidopsis_thaliana_miR863-5p
CAGATATCTTGACTCATAAGATGTAGAACTAGAGAAGAGTTGGGGAAACTTCTTATGCTTGTGATCTCAATAGCATTGATACAATGTATATATGCAATTTAGAATATGTTTTCTAATTTGAATAAGA
*****TTATGCTTGTGATCTCAAT*****
.....TTCTTATGCTTGTGATCTC..... 2 21
.....TTCTTATGCTTGTGATCTCA..... 1 22
.....TCTTATGCTTGTGATCTCA..... 2 21
.....TCTTATGCTTGTGATCTCAATA..... 1 24
.....CTTATGCTTGTGATCTCA..... 1 20
.....CTTATGCTTGTGATCTCA..... 8 21
.....TTATGCTTGTGATCTCAAT..... 3 21
.....TTATGCTTGTGATCTCAATAGCA..... 1 25
.....TATGCTTGTGATCTCAATA..... 3 21
.....TATGCTTGTGATCTCAATAGCA..... 3 24
.....ATGCTTGTGATCTCAATA..... 1 20
.....ATGCTTGTGATCTCAATAG..... 2 21
.....ATGCTTGTGATCTCAATAGCATT..... 1 25
.....TGTCTTGTGATCTCAATAGC..... 1 21
.....TCTTGTGATCTCAATAGCAT..... 11 21
.....TCTTGTGATCTCAATAGCATT..... 3 22
.....CTTGTGATCTCAATAGCATT..... 1 21
.....CTTGTGATCTCAATAGCATTGAT..... 1 24
.....TTGTGATCTCAATAGCA..... 1 18
.....TTGTGATCTCAATAGCAT..... 1 19
.....TTGTGATCTCAATAGCATT..... 4 20
.....TTGTGATCTCAATAGCATTG..... 30 21
.....TGTGATCTCAATAGCAT..... 1 18
.....TGTGATCTCAATAGCATTG..... 2 20
.....TGTGATCTCAATAGCATTGA..... 1 21
.....TGTGATCTCAATAGCATTGAT..... 1 22
.....TTGATCTCAATAGCATTGAT..... 1 20
.....ATAGCATTGATACAATGTATA..... 1 21
.....ATACAATGTATATATATGCAA..... 4 21
.....TACAATGTATATATGCAAT..... 4 21
.....TATATATGCAATTTAGAATAT..... 1 21
.....ATATATGCAATTTAGAATATGTT..... 1 24
.....TATGCAATTTAGAATATGTT..... 2 21
.....ATGCAATTTAGAATATGTTT..... 2 21
.....CAATTTAGAATATGTTTCTCA..... 1 23
.....TTTGAATATGTTTCTCA..... 14 21

```

```

>ath-miR863-3p_MIMAT0004310_Arabidopsis_thaliana_miR863-3p
TTTATTCAAATTAGGTGAAACATAAATCTAGGTTGTATATATATGTTATACCAATCGGATTGAGAGCAACAAGACATAATAAAGAGTTTGGAAACTTTTTCTAGTTTCTACATAAGAGGATCTGACACCTGGAAT
*****TTGAGAGCAACAAGACATAA*****
.....ATTCAAATTAGGTGAAACATA..... 1 21
.....ATTAGGTGAAACATAAATCTAG..... 1 21
.....AGGTGAAACATAAATCTAGTTGTA..... 2 24
.....TGAAACATAAATCTAGTTGTA..... 5 21
.....ACATAAATCTAGTTGTATAT..... 1 21
.....ACATAAATCTAGTTGTATATA..... 1 22
.....ACATAAATCTAGTTGTATATA..... 9 21
.....ATAAATCTAGTTGTATATA..... 4 21
.....TATATATGTTATACCAATGCG..... 1 21
.....ATATGTTATACCAATGCGA..... 107 21
.....ATATGTTATACCAATGCGA..... 2 19
.....ATACCAATGCGATTGAGAGCAA..... 1 22
.....TACCAATGCGATTGAGAGCAA..... 30 21
.....ACCAATGCGATTGAGAGCAA..... 1 20
.....ACCAATGCGATTGAGAGCAAC..... 11 21
.....ACCAATGCGATTGAGAGCAACAAG..... 1 24
.....CAATGCGATTGAGAGCAACAA..... 14 21
.....CAATGCGATTGAGAGCAACAAGA..... 1 23
.....CAATGCGATTGAGAGCAACAAGAC..... 16 24
.....AATGCGATTGAGAGCAACAA..... 1 20
.....AATGCGATTGAGAGCAACAAG..... 100 21
.....AATGCGATTGAGAGCAACAAGA..... 4 22
.....AATGCGATTGAGAGCAACAAGAC..... 1 23
.....AATGCGATTGAGAGCAACAAGACA..... 17 24
.....ATGCGATTGAGAGCAACA..... 2 18
.....ATGCGATTGAGAGCAACA..... 2 19
.....ATGCGATTGAGAGCAACAAG..... 12 20
.....ATGCGATTGAGAGCAACAAGA..... 548 21
.....ATGCGATTGAGAGCAACAAGAC..... 18 22
.....ATGCGATTGAGAGCAACAAGACA..... 17 23
.....ATGCGATTGAGAGCAACAAGACAT..... 40 24
.....TGCGATTGAGAGCAACAAG..... 5 19
.....TGCGATTGAGAGCAACAAGA..... 29 20
.....TGCGATTGAGAGCAACAAGAC..... 485 21
.....TGCGATTGAGAGCAACAAGACA..... 64 22
.....TGCGATTGAGAGCAACAAGACATA..... 1 24
.....GCGATTGAGAGCAACAAGA..... 12 19
.....GCGATTGAGAGCAACAAGAC..... 30 20
.....GCGATTGAGAGCAACAAGACA..... 30 21
.....GCGATTGAGAGCAACAAGACAT..... 4 22
.....CGATTGAGAGCAACAAGA..... 1 18
.....CGATTGAGAGCAACAAGAC..... 1 19

```

```

.....CGATTGAGCAACAAGACAT..... 4 21
.....CGATTGAGCAACAAGACATAA..... 2 24
.....CGATTGAGCAACAAGACATAATA..... 1 25
.....CGATTGAGCAACAAGACATAATAAAG..... 1 28
.....GATTGAGCAACAAGACATA..... 1 21
.....ATTGAGCAACAAGACA..... 1 18
.....ATTGAGCAACAAGACATAA..... 1 21
.....ATTGAGCAACAAGACATAATAA..... 1 24
.....TTGAGCAACAAGACAT..... 1 18
.....TTGAGCAACAAGACATA..... 2 19
.....TTGAGCAACAAGACATAA..... 24 20
.....TTGAGCAACAAGACATAAT..... 214 21
.....TTGAGCAACAAGACATAATA..... 5 22
.....TTGAGCAACAAGACATAATAA..... 2 23
.....TTGAGCAACAAGACATAATAA..... 8 24
.....TGAGCAACAAGACATAA..... 2 19
.....TGAGCAACAAGACATAAT..... 6 20
.....TGAGCAACAAGACATAATA..... 11 21
.....GAGCAACAAGACATAATA..... 1 20
.....AGCAACAAGACATAATAAAGAG..... 2 24
.....AGCAACAAGACATAATAAAGAG..... 1 22
.....GCAACAAGACATAATAAAGAG..... 1 21

```

```

>ath-miR865-5p_MIMAT0004313_Arabidopsis_thaliana_miR865-5p
GATTGGGGTTTCTGGTAACTCCTTTAATCTCAGCTCGTCAGACAAAATGATCTGGGATGAATTTGGTCTAATTGAGCAAAAAATGTGTTTTTCAATCTATTGAATTCACATCCTTAAACCCCTGGATATTCAA
*****ATGAATTTGGATCTAATTGAG*****
.....AAAATGATCTGGGATGAATTTGG..... ath-miR865-5p 21
.....AAAATGATCTGGGATGAATTTGGGA..... 1 25
.....ATCTGGGATGAATTTGGATCT..... 1 21
.....TCTGGGATGAATTTGGAT..... 1 18
.....TCTGGGATGAATTTGGATC..... 2 19
.....TCTGGGATGAATTTGGATCT..... 2 20
.....TCTGGGATGAATTTGGATCTA..... 8 21
.....TCTGGGATGAATTTGGATCTAAT..... 1 23
.....ATGAATTTGGATCTAATTGAG..... 4 21
.....TGAATTTGGATCTAATTGAG..... 1 20
.....TGAATTTGGATCTAATTGAGC..... 1 21
.....AATTTGGATCTAATTGAG..... 3 18
.....AATTTGGATCTAATTGAGCAA..... 1 21
.....TTGGATCTAATTGAGCAAAA..... 1 21
.....TTGGATCTAATTGAGCAAAA..... 1 22
.....TTGGATCTAATTGAGCAAAA..... 1 21

```

```

>ath-miR866-5p_MIMAT0004315_Arabidopsis_thaliana_miR866-5p
TCATCATCAGCTCTTATTTTCTCAATTCATCAATCATCATCTATTCTTACTTTTCAAGGAACGGATTTTGTAACTAAATGATTCACACCCCTGAAGAAACACGATCTCGTGAATCATTTCGTTAAACAAAAT
*****TCAAGGAACGGATTTTGTAA*****
.....TTTCAAGGAACGGATTTTGTAA..... ath-miR866-5p 21
.....TTCAAGGAACGGATTTTGT..... 1 23
.....TTCAAGGAACGGATTTTGT..... 1 19
.....TTCAAGGAACGGATTTTGTAA..... 5 21
.....TTCAAGGAACGGATTTTGTAA..... 12 22
.....TCAAGGAACGGATTTTGTAA..... 5 20
.....TCAAGGAACGGATTTTGTAA..... 4 21
.....TCAAGGAACGGATTTTGTAAAC..... 11 22
.....CAAGGAACGGATTTTGTAA..... 1 19
.....CAAGGAACGGATTTTGTAA..... 1 20

```

```

>ath-miR1888_MIMAT0007855_Arabidopsis_thaliana_miR1888
TCATTATGGTGGATCATTATTGGTGGATCATTATTGGTGGATCTTAAACAAAATTTTAAAGTTAAGATTGTGAAGAAAGACTTTTATATAAGAGTTTTAGGCTTATATTTAAATTTTTTCTCATAAATCTTAGC
*****TAAGTTAAGATTGTGAAGAA*****
.....ATTGGTGGATCTTAAACAAA..... ath-miR1888 21
.....TGTGGTATCTTAAACAAA..... 13 21
.....TTAAGTTAAGATTGTGAAGA..... 1 19
.....TTAAGTTAAGATTGTGAAGA..... 1 21
.....TTAAGTTAAGATTGTGAAGA..... 8 22
.....TAAGTTAAGATTGTGAAGA..... 44 21
.....AAGTTAAGATTGTGAAGA..... 2 20
.....AGTTAAGATTGTGAAGAAGAA..... 2 22
.....GATTTGTGAAGAAAGACTTTTAT..... 1 24

```

```

>ath-miR2112-5p_MIMAT0011154_Arabidopsis_thaliana_miR2112-5p
ACTATATCAAGATCTCAACTAACTGAGTTATTGAAGCATACAAAAGTAAATGATGCGCAATGCGGATATCAATGTAATCAGGCAACAAACCAATAGAGGTCTCAGCGAAAACAAAATGTGAAAAGGGTT
*****CGCAATGCGGATATCAATGT*****
.....TGAATGATGCGCAATGCGGATA..... ath-miR2112-5p 21
.....AATGATGCGCAATGCGGATA..... 1 24
.....ATGATGCGCAATGCGGATA..... 54 21
.....ATGATGCGCAATGCGGATA..... 10 21
.....TGATGCGCAATGCGGATA..... 2 19
.....TGATGCGCAATGCGGATA..... 1 20
.....ATGCGCAATGCGGATATCAA..... 3 21
.....GCGCAATGCGGATATCAA..... 1 19
.....CGCAATGCGGATATCAATG..... 2 20
.....CGCAATGCGGATATCAATGT..... 17 21
.....GCAATGCGGATATCAATG..... 2 19
.....GCAATGCGGATATCAATGT..... 5 20
.....GCAATGCGGATATCAATGT..... 2 21
.....AAATGCGGATATCAATGTAAA..... 5 21
.....ATGCGGATATCAATGTAATC..... 1 21

```

Fig. S7

|                                                                                                                                      |                                  |             |
|--------------------------------------------------------------------------------------------------------------------------------------|----------------------------------|-------------|
| <b>&gt;osa-miR156d_MIMAT000621_Oryza_sativa_miR156d</b>                                                                              |                                  |             |
| AGGTTCTTAATGACAAGTAAGGCAAGAAATTTCTAGCACGGAGAAGCTCTCATGAGATTGACAGAAGAGAGTGAGCACACGGCGTATGCCGGCATAAAATCTATCCCGTCTCGCCGGTCTCCTCTCTTTCT  |                                  |             |
| *****TGACAGAAGAGTGAAGC*****                                                                                                          |                                  | osa-miR156d |
| .....TCTAATGACAAGTAAGGCAAGAA.....                                                                                                    | .....AGATTGACAGAAGAGTGAAG.....   | 1 24        |
| .....TAATGACAAGTAAGGCAAGAAAT.....                                                                                                    | .....ATTGACAGAAGAGTGAAG.....     | 1 24        |
| .....AAGTAAGGCAAGAAATTTCTAGC.....                                                                                                    | .....TTGACAGAAGAGTGAAG.....      | 1 24        |
| .....                                                                                                                                | .....TTGACAGAAGAGTGAAG.....      | 2 18        |
| .....                                                                                                                                | .....ATTGACAGAAGAGTGAAG.....     | 15 20       |
| .....                                                                                                                                | .....ATTGACAGAAGAGTGAAG.....     | 18 21       |
| .....                                                                                                                                | .....ATTGACAGAAGAGTGAAG.....     | 1458 22     |
| .....                                                                                                                                | .....ATTGACAGAAGAGTGAAG.....     | 4 23        |
| .....                                                                                                                                | .....TTGACAGAAGAGTGAAG.....      | 9 18        |
| .....                                                                                                                                | .....TTGACAGAAGAGTGAAG.....      | 749 19      |
| .....                                                                                                                                | .....TTGACAGAAGAGTGAAG.....      | 661 20      |
| .....                                                                                                                                | .....TTGACAGAAGAGTGAAG.....      | 351455 21   |
| .....                                                                                                                                | .....TTGACAGAAGAGTGAAG.....      | 92 22       |
| .....                                                                                                                                | .....TGACAGAAGAGTGAAG.....       | 486 18      |
| .....                                                                                                                                | .....TGACAGAAGAGTGAAG.....       | 463 19      |
| .....                                                                                                                                | .....TGACAGAAGAGTGAAG.....       | 164656 20   |
| .....                                                                                                                                | .....TGACAGAAGAGTGAAG.....       | 437 21      |
| .....                                                                                                                                | .....GACAGAAGAGTGAAG.....        | 7 18        |
| .....                                                                                                                                | .....GACAGAAGAGTGAAG.....        | 3433 19     |
| .....                                                                                                                                | .....GACAGAAGAGTGAAG.....        | 112 20      |
| .....                                                                                                                                | .....ACAGAAGAGTGAAG.....         | 323 18      |
| .....                                                                                                                                | .....ACAGAAGAGTGAAG.....         | 406 19      |
| .....                                                                                                                                | .....ACAGAAGAGTGAAG.....         | 11 20       |
| .....                                                                                                                                | .....CAGAAGAGTGAAG.....          | 6 18        |
| .....                                                                                                                                | .....CAGAAGAGTGAAG.....          | 18 20       |
| <b>&gt;osa-miR156f_MIMAT000623_Oryza_sativa_miR156f</b>                                                                              |                                  |             |
| ATGTGGCTATGCTGTCTACTAATGGTTTCTGTTTCTGGTGGTGGCAGTTGACAGAAGAGTGAAGCAGACAGCGGCAGACTGCATGATCTATCAATCTCCCTCGACAGGATAGTAGAGAA              |                                  |             |
| *****TGACAGAAGAGTGAAGC*****                                                                                                          |                                  | osa-miR156f |
| .....                                                                                                                                | .....CAGTGAAGAAGAGTGAAG.....     | 1 20        |
| .....                                                                                                                                | .....CAGTGAAGAAGAGTGAAG.....     | 2 21        |
| .....                                                                                                                                | .....GTTGACAGAAGAGTGAAG.....     | 1 22        |
| .....                                                                                                                                | .....TTGACAGAAGAGTGAAG.....      | 9 18        |
| .....                                                                                                                                | .....TTGACAGAAGAGTGAAG.....      | 749 19      |
| .....                                                                                                                                | .....TTGACAGAAGAGTGAAG.....      | 661 20      |
| .....                                                                                                                                | .....TTGACAGAAGAGTGAAG.....      | 351455 21   |
| .....                                                                                                                                | .....TTGACAGAAGAGTGAAG.....      | 92 22       |
| .....                                                                                                                                | .....TGACAGAAGAGTGAAG.....       | 486 18      |
| .....                                                                                                                                | .....TGACAGAAGAGTGAAG.....       | 463 19      |
| .....                                                                                                                                | .....TGACAGAAGAGTGAAG.....       | 164656 20   |
| .....                                                                                                                                | .....TGACAGAAGAGTGAAG.....       | 437 21      |
| .....                                                                                                                                | .....TGACAGAAGAGTGAAG.....       | 2 24        |
| .....                                                                                                                                | .....GACAGAAGAGTGAAG.....        | 7 18        |
| .....                                                                                                                                | .....GACAGAAGAGTGAAG.....        | 3433 19     |
| .....                                                                                                                                | .....GACAGAAGAGTGAAG.....        | 112 20      |
| .....                                                                                                                                | .....GACAGAAGAGTGAAG.....        | 1 23        |
| .....                                                                                                                                | .....ACAGAAGAGTGAAG.....         | 323 18      |
| .....                                                                                                                                | .....ACAGAAGAGTGAAG.....         | 406 19      |
| .....                                                                                                                                | .....ACAGAAGAGTGAAG.....         | 11 20       |
| .....                                                                                                                                | .....CAGAAGAGTGAAG.....          | 6 18        |
| .....                                                                                                                                | .....CAGAAGAGTGAAG.....          | 20 22       |
| .....                                                                                                                                | .....TGACACAGCGCCAGACTG.....     | 2 22        |
| <b>&gt;osa-miR156g_MIMAT000624_Oryza_sativa_miR156g</b>                                                                              |                                  |             |
| TCGTGGATGATGGACGGATGTGGGGGACGAGAACCATGGCGGTGGCCCGCGCTGCCTGACAGAAGAGTGAAGCAGACAGCGGCAGACTGCATGAATTAACCTGTTGCACGAAGAAGACGACGGACCGAGCTT |                                  |             |
| *****TGACAGAAGAGTGAAGC*****                                                                                                          |                                  | osa-miR156g |
| .....                                                                                                                                | .....TGCTGACAGAAGAGTGAAG.....    | 1 21        |
| .....                                                                                                                                | .....CTGACAGAAGAGTGAAG.....      | 1 19        |
| .....                                                                                                                                | .....CTGACAGAAGAGTGAAG.....      | 2 20        |
| .....                                                                                                                                | .....CTGACAGAAGAGTGAAG.....      | 688 21      |
| .....                                                                                                                                | .....CTGACAGAAGAGTGAAG.....      | 2 22        |
| .....                                                                                                                                | .....TGACAGAAGAGTGAAG.....       | 486 18      |
| .....                                                                                                                                | .....TGACAGAAGAGTGAAG.....       | 463 19      |
| .....                                                                                                                                | .....TGACAGAAGAGTGAAG.....       | 164656 20   |
| .....                                                                                                                                | .....TGACAGAAGAGTGAAG.....       | 437 21      |
| .....                                                                                                                                | .....TGACAGAAGAGTGAAG.....       | 2 24        |
| .....                                                                                                                                | .....GACAGAAGAGTGAAG.....        | 7 18        |
| .....                                                                                                                                | .....GACAGAAGAGTGAAG.....        | 3433 19     |
| .....                                                                                                                                | .....GACAGAAGAGTGAAG.....        | 112 20      |
| .....                                                                                                                                | .....GACAGAAGAGTGAAG.....        | 1 23        |
| .....                                                                                                                                | .....ACAGAAGAGTGAAG.....         | 323 18      |
| .....                                                                                                                                | .....ACAGAAGAGTGAAG.....         | 406 19      |
| .....                                                                                                                                | .....ACAGAAGAGTGAAG.....         | 11 20       |
| .....                                                                                                                                | .....CAGAAGAGTGAAG.....          | 6 18        |
| .....                                                                                                                                | .....AGAGTGAAGCAGACAGCGGCAG..... | 2 22        |
| .....                                                                                                                                | .....ACAGCGGCAGACTGCATCTGAA..... | 1 23        |
| <b>&gt;osa-miR162a_MIMAT000632_Oryza_sativa_miR162a</b>                                                                              |                                  |             |
| GTGTTCTTTTTTCTCTCTTTGGTCTTGTGCGAGCCAAACAAGCCGGGAATCATGATAAACCCTGCGATCAGTCTCGCCCTTTTGTGTTCAAGGGCTGAGGCAGTAGTACTGGCTATTGCTCTTCTGCTTC   |                                  |             |
| *****TCGATAAACCTCTGCATCCAG*****                                                                                                      |                                  | osa-miR162a |
| .....                                                                                                                                | .....TCGATAAACCTCTGCATCC.....    | 1 19        |
| .....                                                                                                                                | .....TCGATAAACCTCTGCATCC.....    | 1 20        |
| .....                                                                                                                                | .....TCGATAAACCTCTGCATCC.....    | 561 21      |
| .....                                                                                                                                | .....TCGATAAACCTCTGCATCC.....    | 2 22        |
| .....                                                                                                                                | .....TCGATAAACCTCTGCATCC.....    | 1 23        |
| .....                                                                                                                                | .....CGATAAACCTCTGCATCC.....     | 6 20        |
| .....                                                                                                                                | .....CGATAAACCTCTGCATCC.....     | 1 21        |
| .....                                                                                                                                | .....GATAAACCTCTGCATCC.....      | 10 19       |
| <b>&gt;osa-miR166a_MIMAT000635_Oryza_sativa_miR166a</b>                                                                              |                                  |             |
| CACCTTGGGTTTGGAGGATTTGTCGAAGTTTTTATTCTCTCATCCGTTGGATCTGGACAGGCTTATCCCTCAGAGTAGCTCAAAACATAGATCTATAGTCTCGCTATTATTCTTCACTTCTTC          |                                  |             |
| *****TCGGACAGGCTTCAATCC*****                                                                                                         |                                  | osa-miR166a |
| .....                                                                                                                                | .....TCTCATCCGTTGGATCTGGAC.....  | 1 23        |
| .....                                                                                                                                | .....ATCTGGACAGGCTTCAATCC.....   | 4 22        |
| .....                                                                                                                                | .....ATCTGGACAGGCTTCAATCC.....   | 1 24        |
| .....                                                                                                                                | .....TCTGGACAGGCTTCAAT.....      | 14 18       |
| .....                                                                                                                                | .....TCTGGACAGGCTTCAAT.....      | 13 19       |
| .....                                                                                                                                | .....TCTGGACAGGCTTCAAT.....      | 26 20       |
| .....                                                                                                                                | .....TCTGGACAGGCTTCAAT.....      | 3084 21     |
| .....                                                                                                                                | .....TCTGGACAGGCTTCAAT.....      | 1 22        |
| .....                                                                                                                                | .....CTGGACAGGCTTCAAT.....       | 4 19        |
| .....                                                                                                                                | .....CTGGACAGGCTTCAAT.....       | 139 20      |
| .....                                                                                                                                | .....CTGGACAGGCTTCAAT.....       | 16 21       |
| .....                                                                                                                                | .....CTGGACAGGCTTCAAT.....       | 106 22      |

```

.....TCGGACCAGGCTTCATTC..... 267 18
.....TCGGACCAGGCTTCATTC..... 715 19
.....TCGGACCAGGCTTCATCCC..... 770 20
.....TCGGACCAGGCTTCATCCCC..... 30003 21
.....TCGGACCAGGCTTCATCCCT..... 35 22
.....CGACCAGGCTTCATTC..... 14 18
.....CGACCAGGCTTCATCCC..... 43 19
.....CGACCAGGCTTCATCCCC..... 647 20
.....CGACCAGGCTTCATCCCT..... 3 21
.....CGACCAGGCTTCATCCCC..... 33 18
.....CGACCAGGCTTCATCCCC..... 280 19
.....TCATCCCCCTCAGAGTAGCTT..... 1 23

```

```

>osa-miR166b_MIMAT0000636_Oryza_sativa_miR166b
TCTCAATCGATCTTAAGAAAAAGATCAGTCAAGAGATGAGATGATGTCTGTAGATCTGGACCAGGCTTCATCCCCCAACAGAAGGGCTCCCATGCATATCGATCATGAGCTAGCTTATACCCCTGTCTTTG
*****TCGGACCAGGCTTCATCCCC*****osa-miR166b 21
.....ATCTCGACCAGGCTTCATTC..... 4 22
.....ATCTCGACCAGGCTTCATCCCC..... 1 24
.....TCTCGACCAGGCTTCAT..... 14 18
.....TCTCGACCAGGCTTCATT..... 13 19
.....TCTCGACCAGGCTTCATTC..... 26 20
.....TCTCGACCAGGCTTCATTC..... 3084 21
.....TCTCGACCAGGCTTCATCCC..... 1 22
.....CTCGACCAGGCTTCATTC..... 4 19
.....CTCGACCAGGCTTCATCCC..... 139 20
.....CTCGACCAGGCTTCATCCC..... 16 21
.....CTCGACCAGGCTTCATCCCC..... 106 22
.....TCGGACCAGGCTTCATTC..... 267 18
.....TCGGACCAGGCTTCATTC..... 715 19
.....TCGGACCAGGCTTCATCCCC..... 770 20
.....TCGGACCAGGCTTCATCCCC..... 30003 21
.....TCGGACCAGGCTTCATCCCC..... 2 22
.....CGACCAGGCTTCATTC..... 14 18
.....CGACCAGGCTTCATCCCC..... 43 19
.....CGACCAGGCTTCATCCCC..... 647 20
.....CGACCAGGCTTCATCCCC..... 1 21
.....GGACCAGGCTTCATCCC..... 33 18
.....GGACCAGGCTTCATCCCC..... 280 19

```

```

>osa-miR166c_MIMAT0000637_Oryza_sativa_miR166c
GACCTAACACCCGGCGGAATGGCGATTGAGCTGACGTAAGCAAGCTAGGTGGGGGTTTCGGACCAGGCTTCATCCCCCAACTCACTGTTAGTCTTCGGCTTCGGCACAATCGCGGGCGACATGCCAGCGT
*****TCGGACCAGGCTTCATCCCC*****osa-miR166c 21
.....TGGGGGTTTCGGACCAGG..... 1 20
.....GTTTCGGACCAGGCTTCATTC..... 1 21
.....GTTTCGGACCAGGCTTCATCCCC..... 1 24
.....TTTCGGACCAGGCTTCATTC..... 21 21
.....TTTCGGACCAGGCTTCATCCC..... 19 22
.....TTTCGGACCAGGCTTCATT..... 12 18
.....TTTCGGACCAGGCTTCATTC..... 115 19
.....TTTCGGACCAGGCTTCATCCC..... 70 20
.....TTTCGGACCAGGCTTCATCCCC..... 16400 21
.....TTTCGGACCAGGCTTCATCCCC..... 46 22
.....TTTCGGACCAGGCTTCATCCCC..... 1 23
.....TCGGACCAGGCTTCATTC..... 267 18
.....TCGGACCAGGCTTCATTC..... 715 19
.....TCGGACCAGGCTTCATCCCC..... 770 20
.....TCGGACCAGGCTTCATCCCC..... 30003 21
.....TCGGACCAGGCTTCATCCCC..... 2 22
.....CGACCAGGCTTCATTC..... 14 18
.....CGACCAGGCTTCATCCC..... 43 19
.....CGACCAGGCTTCATCCCC..... 647 20
.....GGACCAGGCTTCATCCCC..... 1 21
.....GGACCAGGCTTCATCCCC..... 33 18
.....GGACCAGGCTTCATCCCC..... 280 19
.....TTCTCGGCTTCGGCACAATC..... 1 22

```

```

>osa-miR166d_MIMAT0000638_Oryza_sativa_miR166d
CTGGCTCGAGGTGCATGGAGAACTCTGATCGATCGGTTGATCTGTAGAGACTGATCTGGACCAGGCTTCATCCCCCAAGTAAAGCTCCCATATTTATATGCTCTGCTGATCGATCGATCTCCGCGTT
*****TCGGACCAGGCTTCATCCCC*****osa-miR166d 21
.....ATCTCGACCAGGCTTCATTC..... 4 22
.....ATCTCGACCAGGCTTCATCCCC..... 1 24
.....TCTCGACCAGGCTTCAT..... 14 18
.....TCTCGACCAGGCTTCATT..... 13 19
.....TCTCGACCAGGCTTCATTC..... 26 20
.....TCTCGACCAGGCTTCATTC..... 3084 21
.....TCTCGACCAGGCTTCATCCC..... 1 22
.....CTCGACCAGGCTTCATTC..... 4 19
.....CTCGACCAGGCTTCATCCC..... 139 20
.....CTCGACCAGGCTTCATCCCC..... 16 21
.....CTCGACCAGGCTTCATCCCC..... 106 22
.....TCGGACCAGGCTTCATTC..... 267 18
.....TCGGACCAGGCTTCATTC..... 715 19
.....TCGGACCAGGCTTCATCCCC..... 770 20
.....TCGGACCAGGCTTCATCCCC..... 30003 21
.....TCGGACCAGGCTTCATCCCT..... 35 22
.....CGACCAGGCTTCATTC..... 14 18
.....CGACCAGGCTTCATCCCC..... 43 19
.....CGACCAGGCTTCATCCCC..... 647 20
.....CGACCAGGCTTCATCCCT..... 3 21
.....GGACCAGGCTTCATCCCC..... 33 18
.....GGACCAGGCTTCATCCCC..... 280 19

```

```

>osa-miR167b_MIMAT0000642_Oryza_sativa_miR167b
CGCGAGAGGTGTCATGTGTCGATCGAATCGAATCGATCTCCGGTCCCAAGAGAAAGCTGAAGCTGCCAGCATGATCTAACTTCGACAGAAGAAATCAGCTCAGCTCGCTGTTTCGAAAGGAGGGCTAGCTGAG
*****TGAAGCTGCCAGCATGATCTA*****osa-miR167b 21
.....GTAAGCTGCCAGCATGATCT..... 1 21
.....TGAAGCTGCCAGCATGAT..... 821 18
.....TGAAGCTGCCAGCATGATC..... 2947 19
.....TGAAGCTGCCAGCATGATCT..... 4149 20
.....TGAAGCTGCCAGCATGATCTA..... 252893 21
.....TGAAGCTGCCAGCATGATCTAA..... 328 22
.....TGAAGCTGCCAGCATGATCTAA..... 1 23
.....GAAGCTGCCAGCATGATC..... 31 18
.....GAAGCTGCCAGCATGATCT..... 31 19
.....GAAGCTGCCAGCATGATCTA..... 2088 20
.....GAAGCTGCCAGCATGATCTAA..... 5 21
.....AAGCTGCCAGCATGATCT..... 6 18
.....AAGCTGCCAGCATGATCTA..... 355 19

```

```

.....AGCTCCAGCATGATCTA..... 1 18

>osa-miR169a_MIMAT0000644_Oryza_sativa_miR169a
AAATTAAGCAGTAGCCGGGAATCGCCGGCCCTGACATTGGGATCGGAGGCCATGGTGCAGCCCAAGGACTTCCCGATCGATGATCTATATGAAGCTAAGTAGCTGGCCATGGATCCATCAATGGCAA
*****CAGCCAAGGATGACTTCCCGA*****
.....TTGGATCGGAGGCCATG..... 1 18
.....TTGGATCGGAGGCCATGGT..... 7 21
.....TTGGATCGGAGGCCATGGT..... 3 22
.....ATCGGAGGCCATGGTGC..... 34 21
.....GACCCAAGGATGACTTCCCG..... 3 21
.....CAGCCAAGGATGACTTCC..... 1 18
.....CAGCCAAGGATGACTTCC..... 1 19
.....CAGCCAAGGATGACTTCCGA..... 200 21
.....CAGCCAAGGATGACTTCCGATCG..... 6 24
.....AGCCAAGGATGACTTCCGA..... 5 20
.....AAGGATGACTTCCGATCG..... 1 19
.....AAGGATGACTTCCGATCGA..... 1 20
.....AAGGATGACTTCCGATCGAT..... 49 21
.....AAGGATGACTTCCGATCGG..... 77 23
.....AAGGATGACTTCCGATCGA..... 120 24
.....AAGGATGACTTCCGATCGAT..... 7 25
.....AGGATGACTTCCGATCGA..... 1 23

>osa-miR395i_MIMAT0000964_Oryza_sativa_miR395i
GGGAGTTCTTCAAGCCTTCACTAGAGCTTCTATTGACATGGAGCTTGAACAATGTGAAGTGTGGGGAACTTGGTACCAAGTGTATCGTGCTAGCAATGGTACTCTCAACGATAACTCATGTTGCA
*****GTGAAGTGTGGGGAACT*****
.....TGAACAATGTGAAGTGTGGGG..... 1 24
.....TGAAGTGTGGGGAACT..... 8 20

>osa-miR397a_MIMAT0000980_Oryza_sativa_miR397a
AAGGAGATGCAGATCATGTACAGAGGGCAAGTCGGATGGAAACAGAGAATCAATGCATCATTGAGTGCAGCGTTGATGAACAACGGTAACCGGTCATGTTGATGGCATTGGCCGGTATCGATCATCAGCG
*****TCATTGAGTGCAGCGTTGATG*****
.....ATCATTGAGTGCAGCGTTGAT..... 1 21
.....TCATTGAGTGCAGCGTTGAT..... 44 21
.....CATTGAGTGCAGCGTTGATGA..... 1 22
.....ATTGAGTGCAGCGTTGATGA..... 11 20
.....ATTGAGTGCAGCGTTGATGA..... 731 21
.....ATTGAGTGCAGCGTTGATGAAC..... 12 22
.....TTGAGTGCAGCGTTGATG..... 3 18
.....TTGAGTGCAGCGTTGATGA..... 6 19
.....TTGAGTGCAGCGTTGATGA..... 42 20
.....TTGAGTGCAGCGTTGATGAAC..... 1766 21
.....TTGAGTGCAGCGTTGATGAACA..... 11 22
.....TTGAGTGCAGCGTTGATGAACA..... 4 23
.....TGAGTGCAGCGTTGATGA..... 3 19
.....TGAGTGCAGCGTTGATGAAC..... 65 20
.....TGAGTGCAGCGTTGATGAACA..... 1 21
.....GAGTGCAGCGTTGATGA..... 2 18
.....GAGTGCAGCGTTGATGAAC..... 15 19
.....AGTGCAGCGTTGATGAAC..... 1 18

>osa-miR397b_MIMAT0000981_Oryza_sativa_miR397b
GCTAGGAATATTGGCAGATTATGATGAGATCGATGGGTGATGGAAGAGAAGGGAAGGCATTATTGAGTGCAGCGTTGATGAACAACCGCCGGCTAAATTAATAGCAAGAAAGTCTGAAACTGGCTCAAAGGTTCAAC
*****TTATTGAGTGCAGCGTTGATG*****
.....TAGGAATATTGGCAGATTAT..... 1 21
.....AATATTGGCAGATTATGATGA..... 1 22
.....ATATTGGCAGATTATGATGA..... 1 21
.....TATTGGCAGATTATGATGA..... 1 22
.....ATGATGAGATCGATGGGTGAT..... 1 21
.....ATGAGATCGATGGGTGATGA..... 2 21
.....TGGGTGATGGAAGAGAAGG..... 1 20
.....ATGGAAGAGAAGGGAAGGCATT..... 1 22
.....ATTGAGTGCAGCGTTGATGA..... 11 20
.....ATTGAGTGCAGCGTTGATGA..... 731 21
.....ATTGAGTGCAGCGTTGATGAAC..... 12 22
.....TTGAGTGCAGCGTTGATG..... 3 18
.....TTGAGTGCAGCGTTGATGA..... 6 19
.....TTGAGTGCAGCGTTGATGA..... 42 20
.....TTGAGTGCAGCGTTGATGAAC..... 1766 21
.....TTGAGTGCAGCGTTGATGAAC..... 632 22
.....TTGAGTGCAGCGTTGATGAACCT..... 1 23
.....TGAGTGCAGCGTTGATGA..... 3 19
.....TGAGTGCAGCGTTGATGAAC..... 65 20
.....TGAGTGCAGCGTTGATGAAC..... 13 21
.....GAGTGCAGCGTTGATGA..... 2 18
.....GAGTGCAGCGTTGATGAAC..... 15 19
.....GAGTGCAGCGTTGATGAAC..... 2 20
.....AGTGCAGCGTTGATGAAC..... 1 18
.....GTTGATGAACCTGCCCGCCG..... 1 22

>osa-miR159a.2_MIMAT000200_Oryza_sativa_miR159a.2
AAATGATGTGTAGTAGGAAATGATGGAGTACTGTTGTTGGATAGCTTATGGCTGATGCCAGGAGCTCATCAACCTACATGACCCCTTTGGATTGAAGGAGCTCGATCTTTGTCAACCTCGA
*****TTGATGCCAGGAGCTCA*****
.....GGCTTGCATGCCAGGAGCTC..... 1 23
.....CTTGCATGCCAGGAGCTG..... 1 20
.....CTTGCATGCCAGGAGCTC..... 57 21
.....CTTGCATGCCAGGAGCTCA..... 2 22
.....TTGATGCCAGGAGCT..... 2 18
.....TTGATGCCAGGAGCTG..... 3 19
.....TTGATGCCAGGAGCTC..... 2769 20
.....TTGATGCCAGGAGCTGCA..... 925 21
.....TTGATGCCAGGAGCTGCAT..... 39 22
.....TGCATGCCAGGAGCTC..... 127 19
.....TGCATGCCAGGAGCTCA..... 37 20
.....TGCATGCCAGGAGCTGCAT..... 4 21
.....GCATGCCAGGAGCTC..... 15 18
.....GCATGCCAGGAGCTGCA..... 5 19
.....AGGAGCTGCATCAACCTACA..... 1 21
.....GGAGCTGCATCAACCTACA..... 1 20
.....ATCAACCTACATGGACCC..... 1 19
.....ATCAACCTACATGGACCCCT..... 17 20
.....ATCAACCTACATGGACCCCT..... 14 21
.....ATCAACCTACATGGACCCCT..... 4 22
.....AACCTACATGGACCCCT..... 1 18
.....CTCTTTGGATTGAAGGAGC..... 1 21
.....CTCTTTGGATTGAAGGAGC..... 1 20
.....CTCTTTGGATTGAAGGAGCT..... 1 21

```

```

.....TCTTTGGATTGAAGGGAGCTC..... 3 21
.....CTTTGGATTGAAGGGAGC..... 4 18
.....CTTTGGATTGAAGGGAGCTCT..... 1 21
.....CTTTGGATTGAAGGGAGCTCTG..... 1 22
.....TTTGGATTGAAGGGAGCT..... 94 18
.....TTTGGATTGAAGGGAGCTC..... 23 19
.....TTTGGATTGAAGGGAGCTCT..... 8 20
.....TTTGGATTGAAGGGAGCTCTG..... 344 21
.....TTTGGATTGAAGGGAGCTCTGC..... 7 22
.....TTGGATTGAAGGGAGCTC..... 2 18
.....TTGGATTGAAGGGAGCTCTG..... 11 20
.....TTGGATTGAAGGGAGCTCTGC..... 10 21
.....TTGGATTGAAGGGAGCTCTGCA..... 1 22
.....TGGATTGAAGGGAGCTCTG..... 5 19

```

```

>osa-miR164e_MIMAT0001035_Oryza_sativa_miR164e
AGTCGATGATACATTGAGCTTGCATCGACGTATATATGTTGGTGTACTGTGCAGGTTGGAGAAGCAGGGCACGTGAGCGCCATCCAGTGTAGCTTGCCTGCGCTCCATGGCGGCAACGCCGTGATCTGGAGTT
*****TGGAGAAGCAGGGCACGTGAG*****
.....TGGAGAAGCAGGGCACGTG..... osa-miR164e 21
.....TGGAGAAGCAGGGCACGTG..... 9 19
.....TGGAGAAGCAGGGCACGTG..... 227 21
.....TGGAGAAGCAGGGCACGTGAGCGG..... 1 24
.....GGAGAAGCAGGGCACGTG..... 1 18
.....GGAGAAGCAGGGCACGTGAG..... 18 20

```

```

>osa-miR166k_MIMAT0001037_Oryza_sativa_miR166k
CGGGGACTCCGGTTTCTCCTTTCTACTGAGGCGCCTAATTTCCGGGAGCTCGGAGCCTCGACAGGCTTCAATCCCTTAAACATGCGGCATATGTCCTGTCAATTGATGATCTAGTCTTCTTGGCATGATCA
*****TGGACAGGCTTCAATCCCT*****
.....CTCGACAGGCTTCAATCCC..... osa-miR166k 21
.....CTCGACAGGCTTCAATCCCT..... 1 21
.....CTCGACAGGCTTCAATCCCT..... 3 22
.....TCGGACAGGCTTCAATC..... 26 18
.....TCGGACAGGCTTCAATCC..... 61 19
.....TCGGACAGGCTTCAATCCC..... 23 20
.....TCGGACAGGCTTCAATCCCT..... 2539 21
.....TCGGACAGGCTTCAATCCCT..... 6 22
.....TCGGACAGGCTTCAATCCCTT..... 1 23
.....CGACAGGCTTCAATCCCT..... 85 20
.....CGACAGGCTTCAATCCCT..... 2 21
.....GGACAGGCTTCAATCCCT..... 13 19

```

```

>osa-miR166l_MIMAT0001038_Oryza_sativa_miR166l
TTCAGGTCCACATTGTGCAAAATGTTCAATCATGAGGACAGAGTCTTGGTGTACTCGACAGGCTTCAATCCCTTAAACAGCATCTGCACAATATGCTCTCATCCGAGTGTGGTGCACCTGGTATGTTATATG
*****TGGACAGGCTTCAATCCCT*****
.....GTGATCTCGACAGGCTTCAATC..... osa-miR166l 21
.....TCTCGACAGGCTTCAATCCC..... 13 22
.....CTCGACAGGCTTCAATCCC..... 1 21
.....CTCGACAGGCTTCAATCCCT..... 3 22
.....TCGGACAGGCTTCAATC..... 26 18
.....TCGGACAGGCTTCAATCC..... 61 19
.....TCGGACAGGCTTCAATCCC..... 23 20
.....TCGGACAGGCTTCAATCCCT..... 2539 21
.....TCGGACAGGCTTCAATCCCTT..... 6 22
.....TCGGACAGGCTTCAATCCCTTT..... 1 23
.....CGACAGGCTTCAATCCCT..... 85 20
.....CGACAGGCTTCAATCCCT..... 2 21
.....GGACAGGCTTCAATCCCT..... 13 19
.....TCAATCCCTTAAACAGCAT..... 1 20

```

```

>osa-miR167d_MIMAT0001039_Oryza_sativa_miR167d
TTGGATCCAACTTAGATCTAAACACAGCCTTATTGTTGAGGTGCAACCATTAGGAGCTGAAGCTGCCAGCATGATCTGATGAGTCTTATTAGGTGAGGGCAGAATTGACTGCCAAAACAAGATCAGATCATGCTGT
*****TGAAGCTGCCAGCATGATCTG*****
.....AACTTTAGATCTAAACAC..... osa-miR167d 21
.....AACTTTAGATCTAAACACAGCCT..... 1 19
.....AACTTTAGATCTAAACACAGCCT..... 1 24
.....AACTTTAGATCTAAACACAGCCT..... 1 23
.....CTGAAGCTGCCAGCATGA..... 2 18
.....CTGAAGCTGCCAGCATGAT..... 1 19
.....CTGAAGCTGCCAGCATGATC..... 6 20
.....CTGAAGCTGCCAGCATGATCT..... 2 21
.....CTGAAGCTGCCAGCATGATCTG..... 17 22
.....CTGAAGCTGCCAGCATGATCTGA..... 842 23
.....CTGAAGCTGCCAGCATGATCTGAT..... 1 24
.....TGAAGCTGCCAGCATGAT..... 821 18
.....TGAAGCTGCCAGCATGATC..... 2947 19
.....TGAAGCTGCCAGCATGATCT..... 4149 20
.....TGAAGCTGCCAGCATGATCTG..... 7236 21
.....TGAAGCTGCCAGCATGATCTGA..... 703870 22
.....TGAAGCTGCCAGCATGATCTGAT..... 778 23
.....TGAAGCTGCCAGCATGATCTGATG..... 1 24
.....GAAGCTGCCAGCATGATC..... 31 18
.....GAAGCTGCCAGCATGATCT..... 31 19
.....GAAGCTGCCAGCATGATCTG..... 27 20
.....GAAGCTGCCAGCATGATCTGA..... 8836 21
.....GAAGCTGCCAGCATGATCTGAT..... 21 22
.....AAGCTGCCAGCATGATCT..... 6 18
.....AAGCTGCCAGCATGATCTG..... 2 19
.....AAGCTGCCAGCATGATCTGA..... 734 20
.....AAGCTGCCAGCATGATCTGAT..... 1 21
.....AAGCTGCCAGCATGATCTGATG..... 1 22
.....AGCTGCCAGCATGATCTGA..... 3 19
.....AGCTGCCAGCATGATCTGATGA..... 5 22

```

```

>osa-miR167e_MIMAT0001040_Oryza_sativa_miR167e
TGTGATTAACCTTGTCTCATGTTCTTGAAGAAGGAAGTTTGTGGTGTGAGAGAATGAAGCTGCCAGCATGATCTGTTGTGAGCATGAGCAGCAATATCATGAGTGTGGTGGTCAAAATCCCGCTTTT
*****TGAAGCTGCCAGCATGATCTG*****
.....TGGTGTGAGAGAATGAAGCTG..... osa-miR167e 21
.....TGAGAGAATGAAGCTGCCAGC..... 1 21
.....AGAATGAAGCTGCCAGCATGAT..... 1 21
.....AATGAAGCTGCCAGCATGATCT..... 1 22
.....ATGAAGCTGCCAGCATGATCT..... 4 22
.....ATGAAGCTGCCAGCATGATCTG..... 1 21
.....TGAAGCTGCCAGCATGAT..... 6 22
.....TGAAGCTGCCAGCATGATC..... 821 18
.....TGAAGCTGCCAGCATGATCT..... 2947 19
.....TGAAGCTGCCAGCATGATCTG..... 4149 20
.....TGAAGCTGCCAGCATGATCTG..... 7236 21
.....TGAAGCTGCCAGCATGATCTG..... 900 22
.....TGAAGCTGCCAGCATGATCTGTT..... 3 23
.....GAAGCTGCCAGCATGATC..... 31 18

```

```

.....GAAGCTGCCAGCATGATCT..... 31 19
.....GAAGCTGCCAGCATGATCTG..... 27 20
.....GAAGCTGCCAGCATGATCTGG..... 5 21
.....AAGCTGCCAGCATGATCT..... 6 18
.....AAGCTGCCAGCATGATCTG..... 2 19
.....AAGCTGCCAGCATGATCTGG..... 2 20

```

```

>osa-miR167f_MIMAT0001041_Oryza_sativa_miR167f
CTCTCTCTCTCTCTCTCTCTCTCTCTCTCTCATATGATGGTGCCACACAAGTGGTGAAGCTGCCAGCATGATCTGATCACAGTAGTCTCTAGCTGATGATGATTACAAACCTAGAGACATGCATCAGATCAT
*****TGAAGCTGCCAGCATGATCTG*****
.....GATGAAGCTGCCAGCATGATCT..... osa-miR167f 21
.....ATGAAGCTGCCAGCATGATCT..... 1 21
.....ATGAAGCTGCCAGCATGATCTG..... 6 22
.....ATGAAGCTGCCAGCATGATCTGA..... 6 23
.....ATGAAGCTGCCAGCATGATCTGAT..... 1 24
.....TGAAGCTGCCAGCATGAT..... 821 18
.....TGAAGCTGCCAGCATGATC..... 2947 19
.....TGAAGCTGCCAGCATGATCT..... 4149 20
.....TGAAGCTGCCAGCATGATCTG..... 7236 21
.....TGAAGCTGCCAGCATGATCTGA..... 703870 22
.....TGAAGCTGCCAGCATGATCTGAT..... 778 23
.....TGAAGCTGCCAGCATGATCTGATC..... 5 24
.....GAAGCTGCCAGCATGATC..... 31 18
.....GAAGCTGCCAGCATGATCT..... 31 19
.....GAAGCTGCCAGCATGATCTG..... 27 20
.....GAAGCTGCCAGCATGATCTGA..... 8836 21
.....GAAGCTGCCAGCATGATCTGAT..... 21 22
.....AAGCTGCCAGCATGATCT..... 6 18
.....AAGCTGCCAGCATGATCTG..... 2 19
.....AAGCTGCCAGCATGATCTGA..... 734 20
.....AAGCTGCCAGCATGATCTGAT..... 1 21
.....AAGCTGCCAGCATGATCTGATC..... 1 22
.....AGCTGCCAGCATGATCTGA..... 3 19

```

```

>osa-miR167g_MIMAT0001042_Oryza_sativa_miR167g
CGATTATGGAGGTAGATGAGATGGCTGTTAATTCCTCTTTTGTGGCCCATAGCAGGTGAAGCTGCCAGCATGATCTGAAAGCATCTCAACACAGGATCAGATGATCCGGAGCTTCTCTCTCATGGCAGCACAC
*****TGAAGCTGCCAGCATGATCTG*****
.....AGGTGAAGCTGCCAGCATGATCTGA..... osa-miR167g 21
.....GTGAAGCTGCCAGCATGATCT..... 2 25
.....TGAAGCTGCCAGCATGAT..... 1 21
.....TGAAGCTGCCAGCATGAT..... 821 18
.....TGAAGCTGCCAGCATGATC..... 2947 19
.....TGAAGCTGCCAGCATGATCT..... 4149 20
.....TGAAGCTGCCAGCATGATCTG..... 7236 21
.....TGAAGCTGCCAGCATGATCTGA..... 703870 22
.....TGAAGCTGCCAGCATGATCTGAA..... 6567 23
.....TGAAGCTGCCAGCATGATCTGAAA..... 17941 24
.....TGAAGCTGCCAGCATGATCTGAAAG..... 1 25
.....TGAAGCTGCCAGCATGATCTGAAAGC..... 6 26
.....TGAAGCTGCCAGCATGATCTGAAAGCATG..... 1 29
.....GAAGCTGCCAGCATGATC..... 31 18
.....GAAGCTGCCAGCATGATCT..... 31 19
.....GAAGCTGCCAGCATGATCTG..... 27 20
.....GAAGCTGCCAGCATGATCTGA..... 8836 21
.....GAAGCTGCCAGCATGATCTGAA..... 71 22
.....GAAGCTGCCAGCATGATCTGAAA..... 74 23
.....AAGCTGCCAGCATGATCT..... 6 18
.....AAGCTGCCAGCATGATCTG..... 2 19
.....AAGCTGCCAGCATGATCTGA..... 734 20
.....AAGCTGCCAGCATGATCTGAA..... 8 21
.....AAGCTGCCAGCATGATCTGAAA..... 12 22
.....AAGCTGCCAGCATGATCTGAAAGCA..... 1 25
.....AGCTGCCAGCATGATCTGA..... 3 19
.....AGCTGCCAGCATGATCTGA..... 10 21
.....AGATCATCCGGAGCTTCTATC..... 2 20
.....GATCATCCGGAGCTTCTATC..... 2 19
.....TCATCCGGAGCTTCTATC..... 56 21
.....CATCCGGAGCTTCTATC..... 1 20

```

```

>osa-miR167h_MIMAT0001043_Oryza_sativa_miR167h
CTCTCTCTCTCCATGAAAGCTAGGAAATTAAGTAAAGGCAAGTGGTGCCACACAAGTGGTGAAGCTGCCAGCATGATCTGATGATGATGATCACCTCTCTCATCTGTTCTTGATTAATACGGATCAATCGATC
*****TGAAGCTGCCAGCATGATCTG*****
.....GTGAAGCTGCCAGCATGATCT..... osa-miR167h 21
.....TGAAGCTGCCAGCATGAT..... 821 18
.....TGAAGCTGCCAGCATGATC..... 2947 19
.....TGAAGCTGCCAGCATGATCT..... 4149 20
.....TGAAGCTGCCAGCATGATCTG..... 7236 21
.....TGAAGCTGCCAGCATGATCTGA..... 703870 22
.....TGAAGCTGCCAGCATGATCTGAT..... 778 23
.....TGAAGCTGCCAGCATGATCTGATG..... 1 24
.....GAAGCTGCCAGCATGATC..... 31 18
.....GAAGCTGCCAGCATGATCT..... 31 19
.....GAAGCTGCCAGCATGATCTG..... 27 20
.....GAAGCTGCCAGCATGATCTGA..... 8836 21
.....GAAGCTGCCAGCATGATCTGAT..... 21 22
.....AAGCTGCCAGCATGATCT..... 6 18
.....AAGCTGCCAGCATGATCTG..... 2 19
.....AAGCTGCCAGCATGATCTGA..... 734 20
.....AAGCTGCCAGCATGATCTGAT..... 1 21
.....AAGCTGCCAGCATGATCTGATG..... 1 22
.....AGCTGCCAGCATGATCTGA..... 3 19
.....AGCTGCCAGCATGATCTGATGA..... 5 20

```

```

>osa-miR167i_MIMAT0001044_Oryza_sativa_miR167i
TGTGTTGAGCAGCATTTTCTTTGGTCAGAAGATATTAGTCTGCTGGTGTGAGAGCTGAAGCTGCCAGCATGATCTGGTCCATGAGTTGCACCTGCTGAATATTTGAATTCAGCCAGGAGCTACTGCAGTTCTG
*****TGAAGCTGCCAGCATGATCTG*****
.....CTGAAGCTGCCAGCATGA..... osa-miR167i 21
.....CTGAAGCTGCCAGCATGAT..... 1 19
.....CTGAAGCTGCCAGCATGATC..... 6 20
.....CTGAAGCTGCCAGCATGATCT..... 2 21
.....CTGAAGCTGCCAGCATGATCTG..... 17 22
.....CTGAAGCTGCCAGCATGATCTGG..... 1 23
.....TGAAGCTGCCAGCATGAT..... 821 18
.....TGAAGCTGCCAGCATGATC..... 2947 19
.....TGAAGCTGCCAGCATGATCT..... 4149 20
.....TGAAGCTGCCAGCATGATCTG..... 7236 21
.....TGAAGCTGCCAGCATGATCTGG..... 900 22
.....TGAAGCTGCCAGCATGATCTGGT..... 3 23
.....GAAGCTGCCAGCATGATC..... 31 18

```

```

.....GAAGCTGCCAGCATGATCT..... 31 19
.....GAAGCTGCCAGCATGATCTG..... 27 20
.....GAAGCTGCCAGCATGATCTGG..... 5 21
.....AAGCTGCCAGCATGATCT..... 6 18
.....AAGCTGCCAGCATGATCTG..... 2 19
.....AAGCTGCCAGCATGATCTGG..... 2 20

```

```

>osa-miR168a_MIMAT0001045_Dryza_sativa_miR168a
CTCCCTCTCGAGAGACACCGCGCTCTGCTCTCATGTGCGCCGCCCTGGGCTCCTTGTGTGCAGATCGGGACCGCGCCGCTGCCGGGCGGATCCCGCTTGACCAAGTGAATCGAGCCGGCGT
*****TCCCTTGTGTGCAGATCGGGAC*****
.....CTCCTTGTGTGCAGATCGGGA..... 6 21
.....CTCCTTGTGTGCAGATCGGGAC..... 250 22
.....TCGCTTGTGTGCAGATCGGG..... 4 18
.....TCGCTTGTGTGCAGATCGGG..... 204 19
.....TCGCTTGTGTGCAGATCGGGA..... 1576 20
.....TCGCTTGTGTGCAGATCGGGAC..... 663911 21
.....TCGCTTGTGTGCAGATCGGGACC..... 1006 22
.....TCGCTTGTGTGCAGATCGGGACCC..... 46 23
.....TCGCTTGTGTGCAGATCGGGACCCG..... 99 24
.....CGCTTGTGTGCAGATCGGGA..... 11 19
.....CGCTTGTGTGCAGATCGGGAC..... 2114 20
.....CGCTTGTGTGCAGATCGGGACC..... 6 21
.....CGCTTGTGTGCAGATCGGGACCC..... 1 22
.....CGCTTGTGTGCAGATCGGGACCCG..... 1 23
.....GCTTGTGTGCAGATCGGGA..... 3 18
.....GCTTGTGTGCAGATCGGGAC..... 507 19
.....CTTGTGTGCAGATCGGGAC..... 10 18
.....TTGTGTGCAGATCGGGACCCG..... 3 21
.....TGGTGTGCAGATCGGGACCCG..... 1 20
.....TGGTGTGCAGATCGGGACCCGC..... 99 21
.....GATCCCGCTTGACCAA..... 1 18
.....GATCCCGCTTGACCAAAGTGAA..... 3 23
.....GATCCCGCTTGACCAAAGTGAA..... 74 24
.....TCCCGCTTGACCAAAGTGAA..... 1 21
.....TCCCGCTTGACCAAAGTGAA..... 2 22
.....CCCGCTTGACCAAAGTGAA..... 5 20
.....CCCGCTTGACCAAAGTGAA..... 73 21
.....CCCGCTTGACCAAAGTGAA..... 11 20
.....CCCGCTTGACCAAAGTGAA..... 4 19
.....CTTGACCAAAGTGAA..... 3 21

```

```

>osa-miR169h_MIMAT0001053_Dryza_sativa_miR169h
TGTAACATATTTGTACTAAGAGACAAGGCTTACATGGAGACAAGGTTTAGCTCTGTGAGCAAGGATGACTTGCCTGTCTGTGTGTAAGGATCATTAAATATTATTCAGAAAATGATCCTTTCAGCAGGTTTC
*****TAGCCAAGGATGACTTGCCTG*****
.....GGTAGCCAAGGATGACTTGCCTG..... 2 23
.....TAGCCAAGGATGACTTGCCT..... 3 20
.....TAGCCAAGGATGACTTGCCTG..... 33 21
.....TAGCCAAGGATGACTTGCCTGT..... 1 22
.....TAGCCAAGGATGACTTGCCTGTG..... 2 23
.....AGCCAAGGATGACTTGCCTG..... 1 20

```

```

>osa-miR169i_MIMAT0001054_Dryza_sativa_miR169i
AGTTAATTTCTGGAGATGGAAGAGACAAGGCTTACATGGAGACAAGGTTTAGCTCTGTGAGCAAGGATGACTTGCCTGTCTGTGTGTAAGGATCATTAAATATTATTCAGAAAATGATCCTTTCAGCAGGTTTC
*****TAGCCAAGGATGACTTGCCTG*****
.....TGGTGATAAAGGTTAGCTCTG..... 1 23
.....TGGTGATAAAGGTTAGCTCTG..... 1 28
.....GGTAGCCAAGGATGACTTGCCTG..... 2 23
.....TAGCCAAGGATGACTTGCCT..... 3 20
.....TAGCCAAGGATGACTTGCCTG..... 33 21
.....TAGCCAAGGATGACTTGCCTGT..... 1 22
.....TAGCCAAGGATGACTTGCCTGTG..... 2 23
.....AGCCAAGGATGACTTGCCTG..... 1 20
.....GAGGATCATTAGAAAATGAGCC..... 1 23

```

```

>osa-miR169j_MIMAT0001055_Dryza_sativa_miR169j
GAGAAGAAAGAAAGAAAGAAAGAGAGGCTCGATGCGCAGTAGAGCTCGCATCTGTGAGCAAGGATGACTTGCCTGTCTGTCTCATGTGAGCAAGGATGACTTTCAGTCTGATATGTGAT
*****TAGCCAAGGATGACTTGCCTG*****
.....GGTAGCCAAGGATGACTTGCCTG..... 2 23
.....TAGCCAAGGATGACTTGCCT..... 3 20
.....TAGCCAAGGATGACTTGCCTG..... 33 21
.....TAGCCAAGGATGACTTGCCTGT..... 1 22
.....TAGCCAAGGATGACTTGCCTGTG..... 2 23
.....AGCCAAGGATGACTTGCCTG..... 1 20

```

```

>osa-miR169k_MIMAT0001056_Dryza_sativa_miR169k
AAACAGAGCCAAACACACACAAGAGAGAGAGATGAAATGATAAGGATCTGTCTAGATGCAAGGATGACTTGCCTGTGCGCCCTTGGAGAGAGAGGTAGCTTAATTAGCAGCATGTTTGGAGCATGCTTGTGATC
*****TAGCCAAGGATGACTTGCCTG*****
.....GATAGCCAAGGATGACTTGCCTG..... 1 23
.....TAGCCAAGGATGACTTGCCT..... 3 20
.....TAGCCAAGGATGACTTGCCTG..... 33 21
.....TAGCCAAGGATGACTTGCCTGT..... 1 22
.....TAGCCAAGGATGACTTGCCTGTG..... 2 23
.....AGCCAAGGATGACTTGCCTG..... 1 20

```

```

>osa-miR169l_MIMAT0001057_Dryza_sativa_miR169l
CTAGATGAAGCAAAAGAGAGAGAGGCTTACATGGATGCGCAGTAAGGACTTATCTCTGATAGCAAGGATGACTTGCCTGTCTCTCCCTGAAGATTAGCAATTAATGATCCTTTAAGCTGTTTATGGGAGTCTCC
*****TAGCCAAGGATGACTTGCCTG*****
.....TGGATGCCAGTAAGGACTTAT..... 1 21
.....TGGATGCCAGTAAGGACTTATCTCT..... 1 25
.....TGGATGCCAGTAAGGACTTATCTCTG..... 1 26
.....TGGATGCCAGTAAGGACTTATCTCTGA..... 3 27
.....TGGCAGTAAGGACTTATCTCTGA..... 1 23
.....GATAGCCAAGGATGACTTGCCTG..... 1 23
.....TAGCCAAGGATGACTTGCCT..... 3 20
.....TAGCCAAGGATGACTTGCCTG..... 33 21
.....TAGCCAAGGATGACTTGCCTGT..... 1 22
.....TAGCCAAGGATGACTTGCCTGTG..... 2 23
.....AGCCAAGGATGACTTGCCTG..... 1 20

```

```

>osa-miR169m_MIMAT0001058_Dryza_sativa_miR169m
TTGATATTGAAAGAAATAGAGATGATGCTTACATGGTGTGAGAGGTAGCTGTGAGCAAGGATGACTTGCCTGTATATTATATATATATGTGTGTGATCAATGATGATCAAGCTGCTTGCAGCC
*****TAGCCAAGGATGACTTGCCTG*****
.....GGTAGCCAAGGATGACTTGCCTG..... 2 23
.....TAGCCAAGGATGACTTGCCT..... 3 20
.....TAGCCAAGGATGACTTGCCTG..... 33 21

```



.....TAGCCAAGGATGACTGCCTGT..... 1 22  
.....AGCCAAGGATGACTGCCTG..... 1 20

>osa-miR171d\_MIMAT0001065\_Oryza\_sativa\_miR171d  
TGCAGAAGAGTGCATGAATCTGATGAGCTCAGTGTAGTATGCTCCATGGAACTTCTGATTGAGCCGTGCCAATATCTCAGCACATTTTATGCAATCATGCTACAGATCACTCCCAAAGTCTCAATTTACCATC  
\*\*\*\*\*TGATTGAGCCGTGCCAATATC\*\*\*\*\*  
.....ACTTCTGATTGAGCCGTGCCA..... 1 21  
.....TTCTGATTGAGCCGTGCCAATATC..... 1 24  
.....CTGATTGAGCCGTGCCAATATC..... 1 20  
.....TGATTGAGCCGTGCCAAT..... 3 22  
.....TGATTGAGCCGTGCCAAT..... 4 18  
.....TGATTGAGCCGTGCCAATAT..... 4 19  
.....TGATTGAGCCGTGCCAATAT..... 1 20  
.....TGATTGAGCCGTGCCAATAT..... 201 21  
.....GATTGAGCCGTGCCAATATC..... 3 20

>osa-miR171e\_MIMAT0001066\_Oryza\_sativa\_miR171e  
TCAGACGGATTGGCTGATGCAAGCATGATGCGTCTGTAGCTCCTTGTCTTCTGATTGAGCCGTGCCAATATCTTAGTCTCTTATGCTGTACGTACGCGCACGCACGGTTGACCATGCATCGACGACGAC  
\*\*\*\*\*TGATTGAGCCGTGCCAATATC\*\*\*\*\*  
.....TTTCTGATTGAGCCGTGCCA..... 1 20  
.....TTCTGATTGAGCCGTGCCAATATC..... 1 24  
.....CTGATTGAGCCGTGCCAATATC..... 1 20  
.....CTGATTGAGCCGTGCCAATATC..... 3 22  
.....TGATTGAGCCGTGCCAAT..... 4 18  
.....TGATTGAGCCGTGCCAATAT..... 4 19  
.....TGATTGAGCCGTGCCAATAT..... 1 20  
.....TGATTGAGCCGTGCCAATATC..... 201 21  
.....GATTGAGCCGTGCCAATATC..... 3 20

>osa-miR393b\_MIMAT0001078\_Oryza\_sativa\_miR393b  
GGTGTAGTGCCTAATCAACCGCCGACATATATGCGCCCTGAGGAACTAGTGGAGACTCCAAAGGATCGCATGTGCTGGCTAGCTATCTCGATGATGCTCCTCATGATCGACGACGACGTGGCTGATCGATGATG  
\*\*\*\*\*TCCAAAGGATCGCATTGATCT\*\*\*\*\*  
.....AGTGAGGACTCCAAAGGG..... 2 19  
.....AGTGAGGACTCCAAAGGAT..... 11 21  
.....GTGGAGGACTCCAAAGGAT..... 1 20  
.....AGGACTCCAAAGGATCGCA..... 1 20  
.....AGGACTCCAAAGGATCGCAT..... 1 21  
.....AGGACTCCAAAGGATCGCATT..... 6 22  
.....AGGACTCCAAAGGATCGCATTA..... 4 24  
.....ACTCCAAAGGATCGCATTGA..... 1 21  
.....CTCCAAAGGATCGCATTGA..... 7 20  
.....CTCCAAAGGATCGCATTGAT..... 29 21  
.....CTCCAAAGGATCGCATTGATC..... 1 22  
.....TCCAAAGGATCGCATTG..... 1 18  
.....TCCAAAGGATCGCATTGA..... 3 19  
.....TCCAAAGGATCGCATTGAT..... 19 20  
.....TCCAAAGGATCGCATTGATC..... 183 21  
.....CAAAGGATCGCATTGATC..... 6 19  
.....AAAGGATCGCATTGATC..... 4 18

>osa-miR167j\_MIMAT0001086\_Oryza\_sativa\_miR167j  
GCCCTCTCTCACTCTTCACTCTCCATTAGCTTTGTGATGTGGACCTTAAGCAGCTGAAGCTGCCAGCATGATGTGATCTTTTGCATCTTTTTTATCTGAATAAGTTGATGAAATATGGGTTCTAAGAT  
\*\*\*\*\*TGAAGCTGCCAGCATGATCTG\*\*\*\*\*  
.....CTGAAGCTGCCAGCATGA..... 2 18  
.....CTGAAGCTGCCAGCATGAT..... 1 19  
.....CTGAAGCTGCCAGCATGATCT..... 6 20  
.....CTGAAGCTGCCAGCATGATCT..... 2 21  
.....CTGAAGCTGCCAGCATGATCTG..... 17 22  
.....CTGAAGCTGCCAGCATGATCTGA..... 842 23  
.....TGAAGCTGCCAGCATGATCTGAT..... 1 24  
.....TGAAGCTGCCAGCATGAT..... 821 18  
.....TGAAGCTGCCAGCATGATC..... 2947 19  
.....TGAAGCTGCCAGCATGATCT..... 4149 20  
.....TGAAGCTGCCAGCATGATCTG..... 7236 21  
.....TGAAGCTGCCAGCATGATCTGA..... 703870 22  
.....TGAAGCTGCCAGCATGATCTGAT..... 778 23  
.....TGAAGCTGCCAGCATGATCTGATC..... 5 24  
.....GAAGCTGCCAGCATGATC..... 31 18  
.....GAAGCTGCCAGCATGATCT..... 31 19  
.....GAAGCTGCCAGCATGATCTG..... 27 20  
.....GAAGCTGCCAGCATGATCTGA..... 8836 21  
.....GAAGCTGCCAGCATGATCTGAT..... 21 22  
.....AAGCTGCCAGCATGATCT..... 6 18  
.....AAGCTGCCAGCATGATCTG..... 2 19  
.....AAGCTGCCAGCATGATCTGA..... 734 20  
.....AAGCTGCCAGCATGATCTGAT..... 1 21  
.....AAGCTGCCAGCATGATCTGATC..... 1 22  
.....AGCTGCCAGCATGATCTGA..... 3 19

>osa-miR166m\_MIMAT0001087\_Oryza\_sativa\_miR166m  
TTTCTTTGCTGAAATTCGATGAGTGTGTGTGATGATGCTGGTGGTGGACCTGGACAGGCTTCATCCCTTAACAGCATTTGCGTTAATACCATGAGCATGCTGCTCTGCAAGTTGACAACTGCT  
\*\*\*\*\*CTGGACAGGCTTCATCCCT\*\*\*\*\*  
.....CTGGACAGGCTTCATCC..... 1 21  
.....CTGGACAGGCTTCATCC..... 4 19  
.....CTGGACAGGCTTCATCC..... 139 20  
.....CTGGACAGGCTTCATCCCT..... 16 21  
.....CTGGACAGGCTTCATCC..... 267 18  
.....CTGGACAGGCTTCATCC..... 715 19  
.....CTGGACAGGCTTCATCCCT..... 770 20  
.....CTGGACAGGCTTCATCCCT..... 123 21  
.....CTGGACAGGCTTCATCCCT..... 9 22  
.....CTGGACAGGCTTCATCCCTT..... 4 23  
.....CGACAGGCTTCATCC..... 14 18  
.....CGACAGGCTTCATCCCT..... 43 19  
.....CGACAGGCTTCATCCCT..... 9 20  
.....GACACAGGCTTCATCCCT..... 33 18  
.....GACACAGGCTTCATCCCT..... 2 19  
.....GACACAGGCTTCATCCCT..... 1 20

>osa-miR435\_MIMAT0001585\_Oryza\_sativa\_miR435  
CGAAAATGCTTGAATAGCTTCAGACCTATAGTGTGTTGATGTTAGGGACATGTTTATCCGGTATTGGAGTTAGGGATGAAAATGGACCAAGTCAAGAGTTTATGGATGAAAGTAGACTTTACCTTTGCT  
\*\*\*\*\*TTATCCGGTATTGGAGTTGA\*\*\*\*\*  
.....TTATCCGGTATTGGAGTTGA..... 1 21  
.....TTATCCGGTATTGGAGTTGA..... 75 20  
.....TTATCCGGTATTGGAGTTGAGG..... 4 22  
.....TTATCCGGTATTGGAGTTGAGGGA..... 1 24

```

.....TATCCGGTATTGGAGTTGAGG..... 1 21
.....ATCCGGTATTGGAGTTGAGGG..... 2 21
.....ATCCGGTATTGGAGTTGAGGGAT..... 1 23
.....CGTATTGGAGTTGAGGGAT..... 1 20
.....CGTATTGGAGTTGAGGGATG..... 21 21
.....CGTATTGGAGTTGAGGGATGAAA..... 3 24
.....GGTATTGGAGTTGAGGGATG..... 2 20
.....GGTATTGGAGTTGAGGGATGA..... 2 21
.....GGTATTGGAGTTGAGGGATGAAA..... 1 24
.....AGGGATGAAAATTGGACCAAG..... 1 21
.....GATGAAAATTGGACCAAGTCAAGA..... 2 24

```

```

>osa-miR437_MIMAT0001586_Oryza_sativa_miR437
ATCAAAATAAATACACTATTGACATATTTCTTAATAACTTGGTCAAAGTTAGAGAAGTTGACTTAGGCAAACTAAACCTTATGATGAAACAGAGGGTATACAATATAAGTTAGCAGTC
*****TGTGAACCGCGGTTGTCGA*****osa-miR437 21
.....TCAAAGTTAGAGAAGTTGAC..... 2 21
.....AAAGTTAGAGAAGTTGACTTAGG..... 6 24
.....AGAAAGTTGACTTAGGACAAAAC..... 1 24

```

```

>osa-miR438_MIMAT0001587_Oryza_sativa_miR438
TCAAAACCAATATATTTTAAATGGCATATATTTCAATTAACGTGTTGGGCAACTGTTCCACCGGTTATAGTAAAACTTTTGGAAATGTTGTTGATGGGATATATATTGATTTGATGATAGTGAAGCATAA
*****TCCACCGGTTATAGTAAAA*****osa-miR438 21
.....ATTGATTTGATGATAGTGAAGCATA..... 1 24

```

```

>osa-miR439a_MIMAT0001589_Oryza_sativa_miR439a
TGTCAAACGACGAGTTGCACATGTACCTGCGAACTGTGGTGTTCGATAGGTATCCCTGCGAACCGCGGTTGTCGACAGGGTGCTAACTGCGATTGCCTAACTGATCTATGTTTCCGATTTCCATTAAA
*****TGTGAACCGCGGTTGTCGA*****osa-miR439a 21
.....AAGTGCAGGTTGCACAT..... 1 19
.....AAGTGCAGGTTGCACATG..... 1 20
.....AAGTGCAGGTTGCACATGT..... 1 21
.....AAGTGCAGGTTGCACATGTACC..... 7 24
.....AAGTGCAGGTTGCACATGTACCT..... 1 25
.....AAGTGCAGGTTGCACATGTAC..... 4 21
.....AAGTGCAGGTTGCACATGTAC..... 1 22
.....AAGTGCAGGTTGCACATGTACCT..... 6 24
.....TGACGAGTTGCACATGTACCT..... 1 24
.....GCAGTTGCACATGTACCTG..... 1 19
.....TCAAAGTTAGAGAAGTTGAC..... 3 24
.....CGAACTGTGGTGTTCGATAGGT..... 2 23
.....CGAACTGTGGTGTTCGATAGGT..... 7 24
.....GAAGTGTGGTGTTCGATAGGT..... 8 23
.....GAAGTGTGGTGTTCGATAGGT..... 27 24
.....AAGTGTGGTGTTCGATAGGT..... 1 21
.....AAGTGTGGTGTTCGATAGGT..... 1 22
.....AAGTGTGGTGTTCGATAGGT..... 1 23
.....AAGTGTGGTGTTCGATAGGTATC..... 9 24
.....ACTGTGGTGTTCGATAGGT..... 2 21
.....TGTGGTGTTCGATAGGT..... 1 20
.....TGTGGTGTTCGATAGGTATCCCTG..... 1 25
.....GTGGTGTTCGATAGGT..... 1 19
.....GATAGGTATCCCTGCGAACCGCG..... 3 24
.....GATAGGTATCCCTGCGAACCGCGG..... 1 25
.....ATAGGTATCCCTGCGAACCGCGG..... 4 24
.....TAGGTATCCCTGCGAACCGCGG..... 1 23
.....TAGGTATCCCTGCGAACCGCGGT..... 3 24
.....AGGTATCCCTGCGAACCGCGGT..... 2 23
.....AGGTATCCCTGCGAACCGCGGTT..... 27 24
.....AGGTATCCCTGCGAACCGCGGTTG..... 1 25
.....GGTATCCCTGCGAACCGCGGTT..... 6 23
.....GGTATCCCTGCGAACCGCGGTTG..... 6 24
.....GTATCCCTGCGAACCGCGGTT..... 2 22
.....GTATCCCTGCGAACCGCGGTTG..... 3 24
.....TATCCCTGCGAACCGCGGTT..... 1 21
.....TATCCCTGCGAACCGCGGTTG..... 1 23
.....ATCCCTGCGAACCGCGGTT..... 1 20
.....ATCCCTGCGAACCGCGGTTG..... 1 21
.....ATCCCTGCGAACCGCGGTTGTC..... 4 24
.....TCCCTGCGAACCGCGGTTG..... 1 20
.....TCCCTGCGAACCGCGGTTGTC..... 1 23
.....GAACCGGTTGTTCCGACAGGTTG..... 1 24
.....AACCAGGTTGTTCCGACAGG..... 1 20
.....AACCAGGTTGTTCCGACAGGTTG..... 1 24
.....CGTTGTTCCGACAGGTTGCTAAAC..... 1 24
.....GGTTGTTCCGACAGGTTGCTAAAC..... 5 24
.....TTGTTCCGACAGGTTGCTAAAC..... 1 21
.....TAAACTTGCAGTTTGCCTAACTG..... 1 24

```

```

>osa-miR439b_MIMAT0001590_Oryza_sativa_miR439b
TGTCAAACGACGAGTTGCACATGTCCCTGCGAACTGTGGTGTTCGATAGGTATCCCTGCGAACCGCGGTTGTCGACAGGGTGCTAACTGCGATTGCCTAACTGACATATAGTTTTCGATTTCCATTAAA
*****TGTGAACCGCGGTTGTCGA*****osa-miR439b 21
.....TGACGAGTTGCACATGTTC..... 1 21
.....GAATTGTGGTGTTCGATAGGTAC..... 1 24
.....ATAGGTATCCCTGCGAACCGCGG..... 1 24
.....AGGTATCCCTGCGAACCGCGG..... 3 24
.....GGTATCCCTGCGAACCGCGGTT..... 1 23
.....ACCCCTGCGAACCGCGGTTGTC..... 1 24
.....GAACCGGTTGTTCCGACAGGTTG..... 1 24
.....AACCAGGTTGTTCCGACAGG..... 1 20
.....AACCAGGTTGTTCCGACAGGTTG..... 1 24
.....CGTTGTTCCGACAGGTTGCTAAAC..... 1 24
.....GGTTGTTCCGACAGGTTGCTAAAC..... 5 24
.....TTGTTCCGACAGGTTGCTAAAC..... 1 21

```

```

>osa-miR439c_MIMAT0001591_Oryza_sativa_miR439c
TGTCAAACGACGAGTTGCACATGTACCTGCGAACTGTGGTGTTCGATAGGTATCCCTGCGAACCGCGGTTGTCGACAGGGTGCTAACTGCGATTGCCTAACTGATTTTACGATTTCCATTAAAATCATATG
*****TGTGAACCGCGGTTGTCGA*****osa-miR439c 21
.....AAGTGCAGGTTGCACAT..... 1 19
.....AAGTGCAGGTTGCACATG..... 1 20
.....AAGTGCAGGTTGCACATGT..... 1 21
.....AAGTGCAGGTTGCACATGTACC..... 7 24
.....AAGTGCAGGTTGCACATGTACCT..... 1 25
.....AAGTGCAGGTTGCACATGTAC..... 4 21
.....AAGTGCAGGTTGCACATGTAC..... 1 22
.....AAGTGCAGGTTGCACATGTACCT..... 6 24
.....TGACGAGTTGCACATGTACCTG..... 1 24
.....GCAGTTGCACATGTACCTG..... 1 19
.....TCAAAGTTAGAGAAGTTGAC..... 3 24

```

```

.....CGAACTGGTTGTTGATAGGT..... 2 23
.....CGAACTGGTTGTTGATAGGTA..... 7 24
.....GAACTGGTTGTTGATAGGTA..... 8 23
.....GAACTGGTTGTTGATAGGTAT..... 27 24
.....AACTGGTTGTTGATAGGT..... 1 21
.....AACTGGTTGTTGATAGGTA..... 1 22
.....AACTGGTTGTTGATAGGTAT..... 1 23
.....AACTGGTTGTTGATAGGTATC..... 9 24
.....ACTGGTTGTTGATAGGTA..... 2 21
.....TGTGGTTGTTGATAGGTAT..... 1 20
.....TGTGGTTGTTGATAGGTATCCCTG..... 1 25
.....GTGGTTGTTGATAGGTAT..... 1 19
.....GATAGGTATCCCTGCGAACCCGG..... 3 24
.....GATAGGTATCCCTGCGAACCCGG..... 1 25
.....ATAGGTATCCCTGCGAACCCGG..... 4 24
.....TAGGTATCCCTGCGAACCCGG..... 1 23
.....TAGGTATCCCTGCGAACCCGGT..... 3 24
.....AGGTATCCCTGCGAACCCGGT..... 2 23
.....AGGTATCCCTGCGAACCCGGTT..... 27 24
.....AGGTATCCCTGCGAACCCGGTTG..... 1 25
.....GGTATCCCTGCGAACCCGGTT..... 6 23
.....GGTATCCCTGCGAACCCGGTTG..... 6 24
.....GTATCCCTGCGAACCCGGTT..... 2 22
.....GTATCCCTGCGAACCCGGTTG..... 3 24
.....TATCCCTGCGAACCCGGTT..... 1 21
.....TATCCCTGCGAACCCGGTTG..... 1 23
.....ATCCCTGCGAACCCGGTT..... 1 20
.....ATCCCTGCGAACCCGGTTG..... 1 21
.....ATCCCTGCGAACCCGGTTGTC..... 4 24
.....TCCCTGCGAACCCGGTTG..... 1 20
.....TCCCTGCGAACCCGGTTGTC..... 1 23
.....GAACCCGGTTGTTGACAGGGT..... 1 24
.....AACCCGGTTGTTGACAGG..... 1 20
.....AACCCGGTTGTTGACAGGGT..... 1 24
.....CGTTGTTGACAGGGTCTAAAC..... 1 24
.....GTTGTTGACAGGGTCTAAACT..... 5 24
.....TTGTTGACAGGGTCTAAAC..... 1 21

```

```

>osa-miR439d_MIMAT0001592_Oryza_sativa_miR439d
TGTGAACTCAGCAGTTGCACATGTACCTGCGAACTGGTTGTTGATAGGTATCCCTGCGAACCCGGTTGTTGATAGGGTCTAAACTGCGATTTGCTAACTGACCTATAGTTTGCAGTTTCCATTAA
*****TGTGAAACCCGGTTGTTGCA*****
.....TCGAACTGGTTGTTGATAGGT..... 3 24
.....CGAACTGGTTGTTGATAGGT..... 2 23
.....CGAACTGGTTGTTGATAGGTA..... 7 24
.....GAACTGGTTGTTGATAGGTA..... 8 23
.....GAACTGGTTGTTGATAGGTAT..... 27 24
.....AACTGGTTGTTGATAGGT..... 1 21
.....AACTGGTTGTTGATAGGTA..... 1 22
.....AACTGGTTGTTGATAGGTAT..... 1 23
.....AACTGGTTGTTGATAGGTATC..... 9 24
.....ACTGGTTGTTGATAGGTA..... 2 21
.....TGTGGTTGTTGATAGGTAT..... 1 20
.....TGTGGTTGTTGATAGGTATCCCTG..... 1 25
.....GTGGTTGTTGATAGGTAT..... 1 19
.....GATAGGTATCCCTGCGAACCCGG..... 3 24
.....GATAGGTATCCCTGCGAACCCGG..... 1 25
.....ATAGGTATCCCTGCGAACCCGG..... 4 24
.....TAGGTATCCCTGCGAACCCGG..... 1 23
.....TAGGTATCCCTGCGAACCCGGT..... 3 24
.....AGGTATCCCTGCGAACCCGGT..... 2 23
.....AGGTATCCCTGCGAACCCGGT..... 27 24
.....AGGTATCCCTGCGAACCCGGTT..... 1 25
.....GGTATCCCTGCGAACCCGGTT..... 6 23
.....GGTATCCCTGCGAACCCGGTTG..... 6 24
.....GTATCCCTGCGAACCCGGTT..... 2 22
.....GTATCCCTGCGAACCCGGTTG..... 3 24
.....TATCCCTGCGAACCCGGTT..... 1 21
.....TATCCCTGCGAACCCGGTTG..... 1 23
.....ATCCCTGCGAACCCGGTT..... 1 20
.....ATCCCTGCGAACCCGGTTG..... 1 21
.....ATCCCTGCGAACCCGGTTGTC..... 4 24
.....TCCCTGCGAACCCGGTTG..... 1 20
.....TCCCTGCGAACCCGGTTGTC..... 1 23
.....GTTGTTGATAGGGTCTAAACT..... 1 24

```

```

>osa-miR439e_MIMAT0001593_Oryza_sativa_miR439e
TGTGAACTCAGCAGTTGCACATGTACCTGCGAACTGGTTGTTGATAGGTATCCCTGCGAACCCGGTTGTTGACAGGGTCTAAACTGCGATTTGCTAACTGACCTATAGTTTGCAGTTTCCATTAA
*****TGTGAAACCCGGTTGTTGCA*****
.....AACTGACGAGTTGCACAT..... 1 19
.....AACTGACGAGTTGCACATG..... 1 20
.....AACTGACGAGTTGCACATGT..... 1 21
.....AACTGACGAGTTGCACATGTACC..... 7 24
.....AACTGACGAGTTGCACATGTACCT..... 1 25
.....ACTGACGAGTTGCACATGTA..... 4 21
.....ACTGACGAGTTGCACATGTAC..... 1 22
.....ACTGACGAGTTGCACATGTACCT..... 6 24
.....TGACGAGTTGCACATGTACCTG..... 1 24
.....GCAGTTGCACATGTACCTG..... 1 19
.....TCGAACTGGTTGTTGATAGGT..... 3 24
.....CGAACTGGTTGTTGATAGGT..... 2 23
.....CGAACTGGTTGTTGATAGGTA..... 7 24
.....GAACTGGTTGTTGATAGGTA..... 8 23
.....GAACTGGTTGTTGATAGGTAT..... 27 24
.....AACTGGTTGTTGATAGGT..... 1 21
.....AACTGGTTGTTGATAGGTA..... 1 22
.....AACTGGTTGTTGATAGGTAT..... 1 23
.....AACTGGTTGTTGATAGGTATC..... 9 24
.....ACTGGTTGTTGATAGGTA..... 2 21
.....TGTGGTTGTTGATAGGTAT..... 1 20
.....TGTGGTTGTTGATAGGTATCCCTG..... 1 25
.....GTGGTTGTTGATAGGTAT..... 1 19
.....GATAGGTATCCCTGCGAACCCGG..... 3 24
.....GATAGGTATCCCTGCGAACCCGG..... 1 25
.....ATAGGTATCCCTGCGAACCCGG..... 4 24
.....TAGGTATCCCTGCGAACCCGG..... 1 23
.....TAGGTATCCCTGCGAACCCGGT..... 3 24
.....AGGTATCCCTGCGAACCCGGT..... 2 23
.....AGGTATCCCTGCGAACCCGGTT..... 27 24
.....AGGTATCCCTGCGAACCCGGTTG..... 1 25
.....GGTATCCCTGCGAACCCGGTT..... 6 23

```

```

.....GGTATCCCTGTGAACCGCGGTT..... 6 24
.....GTATCCCTGTGAACCGCGGTT..... 2 22
.....GTATCCCTGTGAACCGCGGTTGT..... 3 24
.....TATCCCTGTGAACCGCGGTT..... 1 21
.....TATCCCTGTGAACCGCGGTTGT..... 1 23
.....ATCCCTGTGAACCGCGGTT..... 1 20
.....ATCCCTGTGAACCGCGGTTGT..... 1 21
.....ATCCCTGTGAACCGCGGTTGTTC..... 4 24
.....TCCCTGTGAACCGCGGTTGT..... 1 20
.....TCCCTGTGAACCGCGGTTGTTC..... 1 23
.....GAACCGCGGTTGTTCGACAGGTT..... 1 24
.....AACCCGCGGTTGTTCGACAGG..... 1 20
.....AACCCGCGGTTGTTCGACAGGTTGC..... 1 24
.....CGTTGTTCGACAGGTTGCTAAAC..... 1 24
.....GGTTGTTCGACAGGTTGCTAAACT..... 5 24
.....TTGTTCGACAGGTTGCTAAAC..... 1 21
.....TGCTAACTTGCAGTTTGTCT..... 1 21

```

>osa-miR439f\_MIMAT0001594\_Oryza\_sativa\_miR439f  
TGTGAACTGACGCGAGTTGCACATGTACCTGTGCGAACTGTGGTTGTTGATAGGTATCCCTGTGAACCGCGGTTGTTCGACAGGTTGCTAAACTTGCAGTTTGCCTAACTGACATAGTTTGCAGTTTTCATTAA  
\*\*\*\*\*TGTGAACCGCGGTTGTTCGA\*\*\*\*\*

```

.....AACTGACGCGAGTTGCACAT..... 1 19
.....AACTGACGCGAGTTGCACATG..... 1 20
.....AACTGACGCGAGTTGCACATGT..... 1 21
.....AACTGACGCGAGTTGCACATGTACC..... 7 24
.....AACTGACGCGAGTTGCACATGTACCT..... 1 25
.....AACTGACGCGAGTTGCACATGTAC..... 4 21
.....AACTGACGCGAGTTGCACATGTAC..... 1 22
.....AACTGACGCGAGTTGCACATGTACCT..... 6 24
.....TGAACCGCGGTTGCACATGTACCTGT..... 1 24
.....GCGAGTTGCACATGTACCTG..... 1 19
.....TCGAACCTGTGGTTGTTGATAGGT..... 3 24
.....CGAACTGTGGTTGTTGATAGGT..... 2 23
.....CGAACTGTGGTTGTTGATAGGTA..... 7 24
.....GAACCTGTGGTTGTTGATAGGTA..... 8 23
.....GAACCTGTGGTTGTTGATAGGTTAT..... 27 24
.....AACTGTGGTTGTTGATAGGT..... 1 21
.....AACTGTGGTTGTTGATAGGTA..... 1 22
.....AACTGTGGTTGTTGATAGGTA..... 1 23
.....AACTGTGGTTGTTGATAGGTATC..... 9 24
.....AACTGTGGTTGTTGATAGGTA..... 2 21
.....TGTGGTTGTTGATAGGTAT..... 1 20
.....TGTGGTTGTTGATAGGTATCCCTG..... 1 25
.....GTGGTTGTTGATAGGTAT..... 1 19
.....GATAGGTATCCCTGTGAACCGCG..... 3 24
.....GATAGGTATCCCTGTGAACCGCGG..... 1 25
.....ATAGGTATCCCTGTGAACCGCG..... 4 24
.....TAGGTATCCCTGTGAACCGCG..... 1 23
.....TAGGTATCCCTGTGAACCGCGGT..... 3 24
.....AGGTATCCCTGTGAACCGCGGT..... 2 23
.....AGGTATCCCTGTGAACCGCGGTT..... 27 24
.....AGGTATCCCTGTGAACCGCGGTTG..... 1 25
.....GGTATCCCTGTGAACCGCGGTT..... 6 23
.....GGTATCCCTGTGAACCGCGGTTG..... 6 24
.....GTATCCCTGTGAACCGCGGTT..... 2 22
.....GTATCCCTGTGAACCGCGGTTGT..... 3 24
.....TATCCCTGTGAACCGCGGTT..... 1 21
.....TATCCCTGTGAACCGCGGTTGT..... 1 23
.....ATCCCTGTGAACCGCGGTT..... 1 20
.....ATCCCTGTGAACCGCGGTTGT..... 1 21
.....ATCCCTGTGAACCGCGGTTGTTC..... 4 24
.....TCCCTGTGAACCGCGGTTG..... 1 20
.....TCCCTGTGAACCGCGGTTGTTC..... 1 23
.....GAACCGCGGTTGTTCGACAGGTTG..... 1 24
.....AACCCGCGGTTGTTCGACAGG..... 1 20
.....AACCCGCGGTTGTTCGACAGGTTGC..... 1 24
.....CGTTGTTCGACAGGTTGCTAAAC..... 1 24
.....GGTTGTTCGACAGGTTGCTAAACT..... 5 24
.....TTGTTCGACAGGTTGCTAAAC..... 1 21
.....TAACTTGCAGTTTGCCTAACTG..... 1 24
.....AACTTGCAGTTTGCCTAACTGACA..... 2 24

```

osa-miR439f 21

>osa-miR439g\_MIMAT0001595\_Oryza\_sativa\_miR439g  
TGTGAACTGACGCGAGTTGCACATGTACCTGTGCGAACTGTGGTTGTTGATAGGTATCCCTGTGAACCGCGGTTGTTCGACAGGTTGCTAAACTTGCAGTTTGCCTAACTGCTCTATAGTTTTCAGTTTTCATTAA  
\*\*\*\*\*TGTGAACCGCGGTTGTTCGA\*\*\*\*\*

```

.....AACTGACGCGAGTTGCACAT..... 1 19
.....AACTGACGCGAGTTGCACATG..... 1 20
.....AACTGACGCGAGTTGCACATGT..... 1 21
.....AACTGACGCGAGTTGCACATGTACC..... 7 24
.....AACTGACGCGAGTTGCACATGTACCT..... 1 25
.....AACTGACGCGAGTTGCACATGTAC..... 4 21
.....AACTGACGCGAGTTGCACATGTAC..... 1 22
.....AACTGACGCGAGTTGCACATGTACCT..... 6 24
.....TGAACCGCGGTTGCACATGTACCTGT..... 1 24
.....GCGAGTTGCACATGTACCTG..... 1 19
.....TCGAACCTGTGGTTGTTGATAGGT..... 3 24
.....CGAACTGTGGTTGTTGATAGGTA..... 2 23
.....CGAACTGTGGTTGTTGATAGGTA..... 7 24
.....GAACCTGTGGTTGTTGATAGGTA..... 8 23
.....GAACCTGTGGTTGTTGATAGGTTAT..... 27 24
.....AACTGTGGTTGTTGATAGGT..... 1 21
.....AACTGTGGTTGTTGATAGGTA..... 1 22
.....AACTGTGGTTGTTGATAGGTATC..... 1 23
.....AACTGTGGTTGTTGATAGGTA..... 9 24
.....AACTGTGGTTGTTGATAGGTA..... 2 21
.....TGTGGTTGTTGATAGGTAT..... 1 20
.....TGTGGTTGTTGATAGGTATCCCTG..... 1 25
.....GTGGTTGTTGATAGGTAT..... 1 19
.....GATAGGTATCCCTGTGAACCGCG..... 3 24
.....GATAGGTATCCCTGTGAACCGCGG..... 1 25
.....ATAGGTATCCCTGTGAACCGCG..... 4 24
.....TAGGTATCCCTGTGAACCGCG..... 1 23
.....TAGGTATCCCTGTGAACCGCGGT..... 3 24
.....AGGTATCCCTGTGAACCGCGGT..... 2 23
.....AGGTATCCCTGTGAACCGCGGTT..... 27 24
.....AGGTATCCCTGTGAACCGCGGTTG..... 1 25
.....GGTATCCCTGTGAACCGCGGTT..... 6 23
.....GGTATCCCTGTGAACCGCGGTTG..... 6 24
.....GTATCCCTGTGAACCGCGGTT..... 2 22
.....GTATCCCTGTGAACCGCGGTTGT..... 3 24

```

osa-miR439g 21

```

.....TATCCCTGTGAACCGCGTT..... 1 21
.....TATCCCTGTGAACCGCGTTGT..... 1 23
.....ATCCCTGTGAACCGCGTT..... 1 20
.....ATCCCTGTGAACCGCGTTG..... 1 21
.....ATCCCTGTGAACCGCGTTGTC..... 4 24
.....TCCCTGTGAACCGCGTTG..... 1 20
.....TCCCTGTGAACCGCGTTGTC..... 1 23
.....GAACCGCGTTGTTCGACAGGTC..... 1 24
.....AACC CGCGTTGTTCGACAGG..... 1 20
.....AACC CGCGTTGTTCGACAGGTC..... 1 24
.....CGTTGTTCGACAGGTCCTAAAC..... 1 24
.....GGTTGTTCGACAGGTCCTAAAC..... 5 24
.....TTGTTCGACAGGTCCTAAAC..... 1 21
.....TAAACTGCGATTCCGCTAACTG..... 1 24

```

```

>osa-miR439h_MIMAT0001596_Oryza_sativa_miR439h
TGTCGAACCTCAGCAGTTGCATGTACCTGTGAACCTGTGGTGTTCGATAGTATCCCTGTGAACCGCGTTGTTCGACAGGTCCTAAACTGCGATTCCGCTAACTGACCTATAGTTTGCAGTTCCATTAAA
*****TGTGAACCGCGTTGTTCGA*****
.....GCAGTTCACATGTACCTG..... 1 19
.....TCGAACCTGTGGTGTTCGATAGT..... 3 24
.....CGAACCTGTGGTGTTCGATAGT..... 2 23
.....CGAACCTGTGGTGTTCGATAGTA..... 7 24
.....GAACCTGTGGTGTTCGATAGTA..... 8 23
.....GAACCTGTGGTGTTCGATAGTAT..... 27 24
.....AACTGTGGTGTTCGATAGT..... 1 21
.....AACTGTGGTGTTCGATAGTA..... 1 22
.....AACTGTGGTGTTCGATAGTAT..... 1 23
.....AACTGTGGTGTTCGATAGTATC..... 9 24
.....ACTGTGGTGTTCGATAGTA..... 2 21
.....TGTGGTGTTCGATAGTAT..... 1 20
.....TGTGGTGTTCGATAGTATCCCTG..... 1 25
.....GTGGTGTTCGATAGTAT..... 1 19
.....GATAGTATCCCTGTGAACCGCG..... 3 24
.....GATAGTATCCCTGTGAACCGCGG..... 1 25
.....ATAGGTATCCCTGTGAACCGCGG..... 4 24
.....TAGGTATCCCTGTGAACCGCGG..... 1 23
.....TAGGTATCCCTGTGAACCGCGT..... 3 24
.....AGTATCCCTGTGAACCGCGG..... 2 23
.....AGTATCCCTGTGAACCGCGTT..... 27 24
.....AGTATCCCTGTGAACCGCGTTG..... 1 25
.....GGTATCCCTGTGAACCGCGTT..... 6 23
.....GGTATCCCTGTGAACCGCGTTG..... 6 24
.....GTATCCCTGTGAACCGCGTT..... 2 22
.....GTATCCCTGTGAACCGCGTTGT..... 3 24
.....TATCCCTGTGAACCGCGTT..... 1 21
.....TATCCCTGTGAACCGCGTTGT..... 1 23
.....ATCCCTGTGAACCGCGTT..... 1 20
.....ATCCCTGTGAACCGCGTTG..... 1 21
.....ATCCCTGTGAACCGCGTTGTC..... 4 24
.....TCCCTGTGAACCGCGTTG..... 1 20
.....TCCCTGTGAACCGCGTTGTC..... 1 23
.....GAACCGCGTTGTTCGACAGGTC..... 1 24
.....AACC CGCGTTGTTCGACAGG..... 1 20
.....AACC CGCGTTGTTCGACAGGTC..... 1 24
.....CGTTGTTCGACAGGTCCTAAAC..... 1 24
.....GGTTGTTCGACAGGTCCTAAAC..... 5 24
.....TTGTTCGACAGGTCCTAAAC..... 1 21
.....TAAACTGCGATTCCGCTAACTG..... 1 24

```

```

osa-miR439h 21
1 19
3 24
2 23
7 24
8 23
27 24
1 21
1 22
1 23
9 24
2 21
1 20
1 25
1 19
3 24
1 25
4 24
1 23
3 24
2 23
27 24
1 25
6 23
6 24
2 22
3 24
1 21
1 23
1 20
1 21
4 24
1 20
1 23
1 24
1 24
5 24
1 21
1 24

```

```

>osa-miR440_MIMAT0001599_Oryza_sativa_miR440
TGCTGGCTCTGCTGATCAGTAGAGACTCTGACCTAGCCCTAACTATGATATTGATCTCTGATGATCGGGCAAGGCTAACACGATGAGAGGATCTACCTTTATCCCTGTTTCAGACCTTCTCTATCCA
*****AGTGTCTCTGATGATCGGGCAAA*****
.....AGTGTCTCTGATGATCGGGCAAA..... 10 24
.....TCCTGATGATCGGGCAAGGCT..... 8 21
.....TCCTGATGATCGGGCAAGGCT..... 3 22
.....CTGATGATCGGGCAAGGCTA..... 4 21
.....TGATGATCGGGCAAGGCTA..... 2 20
.....TGATGATCGGGCAAGGCTAAC..... 8 22
.....TGATCGGGCAAGGCTAACCGA..... 1 24

```

```

osa-miR440 24
10 24
8 21
3 22
4 21
2 20
8 22
1 24

```

```

>osa-miR441a_MIMAT0001602_Oryza_sativa_miR441a
CTCTATTAAACAATGAAGTCATTTAGCATTTCACACATTATATGATCTAGATTATTACCATCAATATAAATGTTGGAAATGCTAAATGACTTACATTGTAAGGAGGGAGTAGTAATCAAATACTAAGCAGCTC
*****TACCATCAATATAAATGTTGGAA*****
.....AATGAAGTCATTTAGCA..... 1 19
.....AATGAAGTCATTTAGCATT..... 1 21
.....TAAGTCATTTAGCATTTC..... 1 19
.....ATCAATATAAATGTTGGAAA..... 1 20
.....ATCAATATAAATGTTGGAAATGCT..... 1 24
.....TCAATATAAATGTTGGAAATGCTA..... 1 24
.....AATATAAATGTTGGAAATGCT..... 1 21
.....ATATAAATGTTGGAAATGCTA..... 1 21
.....ATATAAATGTTGGAAATGCTAAAA..... 1 24
.....AATGTTGGAAATGCTAAAA..... 1 19
.....AATGCTAAATGACTTACAT..... 3 21
.....AATGCTAAATGACTTACATTG..... 1 22
.....ATGCTAAATGACTTACAT..... 1 19
.....ATGCTAAATGACTTACATTG..... 2 21
.....TAAAGTACTTACATTGTA..... 2 20
.....TAAAGTACTTACATTGTAAG..... 1 21
.....TAAAGTACTTACATTGTAAG..... 1 22
.....TAAAGTACTTACATTGTAAGCGG..... 11 24
.....TAAAGTACTTACATTGTAAGCGG..... 1 23
.....TAAAGTACTTACATTGTAAGCGGA..... 17 24
.....TAAAGTACTTACATTGTAAGCGG..... 1 19
.....TAAAGTACTTACATTGTAAGCGG..... 2 21
.....TAAAGTACTTACATTGTAAGCGG..... 8 22
.....TAAAGTACTTACATTGTAAGCGGA..... 30 23
.....TAAAGTACTTACATTGTAAGCGGAG..... 35 24
.....TAAAGTACTTACATTGTAAGCGG..... 35 21
.....TAAAGTACTTACATTGTAAGCGGAG..... 42 22
.....TAAAGTACTTACATTGTAAGCGGAG..... 34 23
.....TAAAGTACTTACATTGTAAGCGGAGG..... 16 24
.....TAAAGTACTTACATTGTAAGCGG..... 7 20
.....TAAAGTACTTACATTGTAAGCGGA..... 119 21
.....TAAAGTACTTACATTGTAAGCGGAG..... 9 22
.....TAAAGTACTTACATTGTAAGCGGAGG..... 18 23
.....TAAAGTACTTACATTGTAAGCGGAGG..... 4 24
.....TAAAGTACTTACATTGTAAGCGG..... 1 19
.....TAAAGTACTTACATTGTAAGCGGA..... 6 20

```

```

osa-miR441a 24
1 19
1 21
1 19
1 20
1 24
1 24
1 21
1 21
1 24
1 19
3 21
1 22
1 19
2 21
2 20
1 21
1 22
11 24
1 23
17 24
1 19
2 21
8 22
30 23
35 24
35 21
42 22
34 23
16 24
7 20
119 21
9 22
18 23
4 24
1 19
6 20

```

```

.....GACTTACATTGTGAACGGAG..... 2 21
.....GACTTACATTGTGAACGGAGGG..... 11 23
.....GACTTACATTGTGAACGGAGGGA..... 35 24
.....ACTTACATTGTGAACGGAG..... 4 20
.....ACTTACATTGTGAACGGAGG..... 18 21
.....ACTTACATTGTGAACGGAGGG..... 11 22
.....ACTTACATTGTGAACGGAGGGG..... 4 24
.....CTTACATTGTGAACGGAGGGAG..... 1 23
.....CTTACATTGTGAACGGAGGGAGT..... 1 24
.....TTACATTGTGAACGGAGG..... 1 19
.....TTACATTGTGAACGGAGGG..... 3 20
.....TTACATTGTGAACGGAGGGA..... 1 21
.....TTACATTGTGAACGGAGGGAG..... 1 22
.....TTACATTGTGAACGGAGGGAGT..... 1 23
.....TACATTGTGAACGGAGGGAG..... 2 21
.....TACATTGTGAACGGAGGGAGTA..... 2 23
.....ACATTGTGAACGGAGGG..... 1 18
.....ACATTGTGAACGGAGGGAGT..... 3 21
.....TTGTGAACGGAGGGAGT..... 1 18
.....TTGTGAACGGAGGGAGTAGTA..... 1 22
.....TGTGAACGGAGGGAGTA..... 1 18
.....TGTGAACGGAGGGAGTAG..... 1 19

```

```

>osa-miR441b_MIMAT0001603_Oryza_sativa_miR441b
AATGTAAGTCATTTAGTAATTTTCATATTGATGTTAATGAATCTAGACTCATGACCATCAATAAATGTTGAAATGTTAGTAAGTACTTACATTATGAACATAGGAGCAGTAGTTTCCAGTGAAGTTAATC
*****TACCATCAATAAATGTTGGAATA*****
.....ATATTGATGTTAATGAAT.....
.....ATATTGATGTTAATGAATCTA.....
.....ATATTGATGTTAATGAATCTAGA.....
.....ATATTGATGTTAATGAATCTAGAC.....
.....TTGATGTTAATGAATCTAGAC.....
.....ATCAATATAAATGTTGGAATA.....
.....ATCAATATAAATGTTGGAATGTT.....
.....AAATGTTGGAATGTTAGTAAGTAC.....
.....TGAATGACTTACATTATGAA.....
.....AGAATGACTTACATTATGAACA.....

```

```

osa-miR441b 24
5 24
4 21
7 23
7 24
1 21
1 20
1 21
1 24
1 24
10 21
1 23

```

```

>osa-miR441c_MIMAT0001604_Oryza_sativa_miR441c
CATTTTCATATTTATATTGATGTAATGAATCTAGATAGATATATGCTAGATTCTTACCATCAATAAATGTTGAAATGTTAGTAAGTACTTACATTATGAACATAGGAGCAGTAGTTTCCAGTGAAGTTAATC
*****TACCATCAATAAATGTTGGAATA*****
.....ATATTGATGTTAATGAAT.....
.....ATTGATGTTAATGAATCTAGATA.....
.....ATATATATGCTAGATTCTATT.....
.....ATCAATATAAATGTTGGAATA.....
.....ATCAATATAAATGTTGGAATGCT.....
.....TCAATATAAATGTTGGAATGCTA.....
.....AATATAAATGTTGGAATGCT.....
.....ATATAAATGTTGGAATGCTA.....
.....ATAAATGTTGGAATGCTAGAA.....
.....ATAAATGTTGGAATGCTAGATA.....
.....AATGTTGGAATGCTAGATA.....
.....AAATGCTAGATAAATCTACATTGT.....
.....AATGCTAGATAAATCTACATTGTG.....
.....ATGCTAGATAAATCTACATTGTGA.....
.....TGCTAGATAAATCTACATTGTGAA.....
.....TAGATAAATCTACATTGTGAA.....
.....AGAATAAATCTACATTGTGAACGG.....
.....GAATAAATCTACATTGTGAACGG.....
.....GAATAAATCTACATTGTGAACGGGA.....
.....AATAAATCTACATTGTGAACGGGA.....
.....AATAAATCTACATTGTGAACGGAG.....
.....TAACCTACATTGTGAACGGAG.....
.....TAACCTACATTGTGAACGGAGG.....
.....AACTTACATTGTGAACGGAG.....
.....AACTTACATTGTGAACGGAGGAA.....
.....ACTTACATTGTGAACGGAG.....
.....ACTTACATTGTGAACGGAGG.....
.....ACTTACATTGTGAACGGAGGA.....
.....ACTTACATTGTGAACGGAGGAA.....
.....CTTACATTGTGAACGGAGGAA.....
.....CTTACATTGTGAACGGAGGAA.....
.....TTACATTGTGAACGGAGG.....
.....TTACATTGTGAACGGAGGA.....
.....TTACATTGTGAACGGAGGAA.....
.....TTACATTGTGAACGGAGGAAG.....
.....TTACATTGTGAACGGAGGAAGT.....
.....TTACATTGTGAACGGAGGAAGTA.....
.....TACATTGTGAACGGAGGA.....
.....TACATTGTGAACGGAGGAA.....
.....TACATTGTGAACGGAGGAAAG.....
.....TACATTGTGAACGGAGGAAGT.....
.....TACATTGTGAACGGAGGAAGTA.....
.....ACATTGTGAACGGAGGA.....
.....ACATTGTGAACGGAGGAA.....
.....ACATTGTGAACGGAGGAAG.....
.....ACATTGTGAACGGAGGAAGT.....
.....ACATTGTGAACGGAGGAAGTA.....
.....ACATTGTGAACGGAGGAAGTACT.....
.....CATTGTGAACGGAGGAAGT.....
.....CATTGTGAACGGAGGAAGTA.....
.....ATTGTGAACGGAGGAAGTACT.....
.....TTGTGAACGGAGGAAGTACT.....
.....GAAGTACTATATTACGAGATCTCA.....

```

```

osa-miR441c 24
1 18
1 23
2 21
1 20
1 24
1 24
1 21
1 21
1 22
1 24
1 18
3 24
1 24
5 24
1 24
1 21
23 24
2 23
19 24
3 23
2 24
1 24
1 22
1 24
2 24
4 20
18 21
8 22
2 23
7 24
1 21
2 22
1 19
4 20
12 21
2 22
3 23
1 24
2 19
4 20
11 21
1 22
2 23
1 18
1 19
1 20
7 21
3 22
2 24
1 20
1 21
1 21
2 21
1 23

```

```

>osa-miR442_MIMAT0001605_Oryza_sativa_miR442
ATGTTTGAACACATATATGGAGTAAATATAAATGAAAAAATAAATATAACAGATGACGTGTAATTCGAGACGAATCTTTTAAAGCTAATGCTCCATGATCTGCAATGTGGTCTACAGTAAACATTTGCTAAT
*****TGACGTGTAATTCGAGACGAAT*****
.....TGTAATTCGAGACGAAT.....
.....GTAATTCGAGACGAATC.....
.....TAAATTCGAGACGAATCTTT.....
.....TAAATTCGAGACGAATCTTTT.....
.....TAAATTCGAGACGAATCTTTT.....
.....AAATTCGAGACGAATCTTT.....
.....AAATTCGAGACGAATCTTTT.....
.....AAATTCGAGACGAATCTTTT.....
.....AAATTCGAGACGAATCTTTTAA.....
.....AAATTCGAGACGAATCTTTTAA.....

```

```

osa-miR442 24
1 18
1 19
1 21
1 22
3 23
1 19
1 21
1 22
7 23
23 24

```

```

.....AATTGCAGAGCAATCTTT..... 2 19
.....AATTGCAGAGCAATCTTTTAA..... 5 22
.....AATTGCAGAGCAATCTTTTAAAG..... 1 23
.....AATTGCAGAGCAATCTTTTAAAGC..... 9 24
.....ATTGCAGAGCAATCTTTTAA..... 2 21
.....ATTGCAGAGCAATCTTTTAAAGC..... 4 23
.....ATTGCAGAGCAATCTTTTAAAGCC..... 9 24
.....TTGCAGAGCAATCTTTT..... 2 18
.....TTGCAGAGCAATCTTTTAA..... 2 19
.....TTGCAGAGCAATCTTTTAAAG..... 1 21
.....TTGCAGAGCAATCTTTTAAAGCC..... 6 23
.....TTGCAGAGCAATCTTTTAAAGCCT..... 3 24
.....TTGCAGAGCAATCTTTTAAAGC..... 1 21
.....CGAGAGCAATCTTTTAAAGCCTAA..... 8 24
.....CGAGAGCAATCTTTTAAAGCCTAAT..... 1 24
.....TAATTGCTCCATGATCTGACAATG..... 2 24
.....AATTGCTCCATGATCTGACAATGT..... 3 24
.....ATTGCTCCATGATCTGACAATGTG..... 1 24
.....GATCTGACAATGGTGTCTACAG..... 1 23
.....TCTGACAATGGTGTCTACAGTA..... 1 23
.....TCTGACAATGGTGTCTACAGTAA..... 1 24
.....CTGACAATGGTGTCTACAGTAA..... 1 24
.....TGACAATGGTGTCTACAGTAA..... 1 22
.....ACAATGGTGTCTACAGTAAACA..... 1 23
.....ACAATGGTGTCTACAGTAAACAT..... 1 24
.....ATGTGGTCTACAGTAAAC..... 1 19

```

```

>osa-miR445a_MIMAT0001607_Oryza_sativa_miR445a
TCTCGCAATAGTCCAAGGTTATAGAATAGGTTTATAAATAGTGTATGTTTAACTCTAAATAGTGTATAAACATCCGATGTGACAGGCACTAAATAGTCCCTGTTCCAAACAGGCCAGCTGCTGCTATGTGCA
*****TAAATAGTGTATAAACATCCGAT*****

```

osa-miR445a 24

```

.....TAGTCCAAGGTTATAGAATAGGTT..... 8 24
.....AGTCCAAGGTTATAGAATAGGTT..... 10 24
.....TCCAAGGTTATAGAATAGGTT..... 1 21
.....ATAGAATAGGTTTATAAATAGTG..... 1 24
.....TTAGTGTATGTTTAACTCT..... 1 21
.....ATGTTTAACTCTAAATAGT..... 1 22
.....ATGTTTAACTCTAAATAGTGT..... 1 24
.....TGTTTAACTCTAAATAGTGT..... 1 23
.....AGTGATAAACATCCGATGTGCA..... 3 24
.....GTGATAAACATCCGATGTGCA..... 1 23
.....ATAAACATCCGATGTGACAGGAC..... 2 24
.....AAACATCCGATGTGACAGG..... 1 19
.....AACATCCGATGTGACAGGAC..... 4 21
.....AACATCCGATGTGACAGGACTT..... 1 23
.....AACATCCGATGTGACAGGACTTA..... 1 24
.....ACATCCGATGTGACAGGAC..... 1 20
.....ACATCCGATGTGACAGGACTTA..... 3 23
.....ACATCCGATGTGACAGGACTTAA..... 2 24

```

```

>osa-miR528_MIMAT0002884_Oryza_sativa_miR528
TTTGGTTGGGATAGGTAGTGTATGTTAGGTCTGTTTTTGGCTGTAGCAGCAGCGTGAAGGGGCATGCAGAGGAG*****TGAAGGGGCATGCAGAGGAG*****

```

osa-miR528 21

```

.....AGCAGCAGCGTGAAGGGGC..... 1 21
.....CAGTGAAGGGGCATGCAGAGGA..... 2 23
.....GTGAAGGGGCATGCAGAGGA..... 4 21
.....TGAAGGGGCATGCAGAG..... 31 18
.....TGAAGGGGCATGCAGAGG..... 77 19
.....TGAAGGGGCATGCAGAGGA..... 221 20
.....TGAAGGGGCATGCAGAGGAG..... 117863 21
.....TGAAGGGGCATGCAGAGGAG..... 530 22
.....TGAAGGGGCATGCAGAGGAGCA..... 13 23
.....TGAAGGGGCATGCAGAGGAGCAG..... 7 24
.....GGAAGGGGCATGCAGAGG..... 5 18
.....GGAAGGGGCATGCAGAGGA..... 13 19
.....GGAAGGGGCATGCAGAGGAG..... 4236 20
.....GGAAGGGGCATGCAGAGGAGG..... 46 21
.....GGAAGGGGCATGCAGAGGAGCA..... 2 22
.....GGAAGGGGCATGCAGAGGAGCAG..... 12 23
.....GGAAGGGGCATGCAGAGGAGCAGG..... 1 24
.....GAAGGGGCATGCAGAGGA..... 2 18
.....GAAGGGGCATGCAGAGGAG..... 279 19
.....GAAGGGGCATGCAGAGGAGC..... 2 20
.....AAGGGGCATGCAGAGGAG..... 29 18
.....AAGGGGCATGCAGAGGAGCAG..... 1 21
.....AAGGGGCATGCAGAGGAGCAGGA..... 2 23
.....AAGGGGCATGCAGAGGAGCAGGAG..... 1 24
.....AGGGGCATGCAGAGGAGCA..... 6 19
.....AGGGGCATGCAGAGGAGCAG..... 3 20
.....AGGGGCATGCAGAGGAGCAGG..... 3 21
.....AGGGGCATGCAGAGGAGCAGGA..... 2 22
.....GGGGCATGCAGAGGAGCAGG..... 1 20
.....GGGGCATGCAGAGGAGCAGGA..... 5 21
.....GGGGCATGCAGAGGAGCAGGAG..... 1 22
.....ATGCAGAGGAGCAGGAGATTCA..... 1 28
.....CAGGAGATTGAGTGAAGCTGCACTTC..... 1 21
.....TCTCTCTGCTTGCCTCTT

```

```

>osa-miR530-5p_MIMAT0006787_Oryza_sativa_miR530-5p
ACTGCATATATAGTGTAGTGTGCTACATATATATAGCAAGTGTGTGTATAGAGCTGCATTTGCACCTGCACCTACAGAGAGGAAGTGAAGCAGCAAGCTAGCAATAGTCTTGCCTATACGCTAGCTTC
*****TGCATTTGCACCTGCACCT*****

```

osa-miR530-5p 20

```

.....TAGAGCTGCATTTGCACCTGCAC..... 4 24
.....AGCTGCATTTGCACCTGCAC..... 1 21
.....CTGCATTTGCACCTGCACCTAC..... 5 22
.....TGCATTTGCACCTGCACCTAC..... 5 18
.....TGCATTTGCACCTGCACCT..... 4 19
.....TGCATTTGCACCTGCACCTA..... 4 20
.....TGCATTTGCACCTGCACCTAC..... 1276 21
.....TGCATTTGCACCTGCACCTACA..... 6 22
.....TGCATTTGCACCTGCACCTACAG..... 4 23
.....GCATTTGCACCTGCACCTAC..... 53 20
.....GCATTTGCACCTGCACCTACAG..... 1 22
.....ATTTGCACCTGCACCTAC..... 2 19
.....ATTTGCACCTGCACCTACAG..... 1 20
.....ACCTGCACCTACAGAGGAGATG..... 1 25

```

```

>osa-miR530-3p_MIMAT0002886_Oryza_sativa_miR530-3p
TTGATGCTATACGCTAGCTTCTTGACACAAATGTTGCTGCTCTCTCTGATCCTAGTGCAGAGGAGATGCAACTATGTGATGACTTCACATCCATCTTTAGTACTTACCACATATATCAATAAATTAGC
*****AGTGCAGAGGAGATGCAAC*****

```

osa-miR530-3p 21

```

.....TCCCTAGTGCAGAGGCAGATGCAAC..... 1 26
.....CCTAGTGCAGAGGCAGATGC..... 2 21
.....CCTAGTGCAGAGGCAGATGCA..... 6 22
.....CCTAGTGCAGAGGCAGATGCAA..... 3 23
.....CCTAGTGCAGAGGCAGATGCAAC..... 138 24
.....CTAGTGCAGAGGCAGATGCA..... 717 21
.....CTAGTGCAGAGGCAGATGCAAC..... 67 23
.....TAGTGCAGAGGCAGATGCA..... 23 20
.....TAGTGCAGAGGCAGATGCAAC..... 1 22
.....AGTGCAGAGGCAGATGCA..... 1 19
.....AGTGCAGAGGCAGATGCAA..... 10 20
.....AGTGCAGAGGCAGATGCAAC..... 408 21
.....AGTGCAGAGGCAGATGCAACT..... 2 22
.....GTCAGAGGCAGATGCAAC..... 15 20

```

```

>osa-miR535_MIMAT0003142_Oryza_sativa_miR535
GATTTCCTGCCCGCCAGCCGACGAGATTGGTGGTAAATTTGCTCGCCGGCCGGTGCACACGAGAGAGGACGCCGGTGCAGCGTGCAGCCGCCGCCGCTACCTCGCTTTCTCCCGTGG
*****TGAACGAGAGAGAGCACG*****
.....CGGTGACACGAGAGAGAGCA..... 4 21
.....CGGTGACACGAGAGAGAGCACG..... 1 24
.....TGACACGAGAGAGAGCA..... 25 18
.....TGACACGAGAGAGAGCAC..... 48 19
.....TGACACGAGAGAGAGCACG..... 144 20
.....TGACACGAGAGAGAGCACG..... 28084 21
.....TGACACGAGAGAGAGCACGCC..... 5 22
.....GACACGAGAGAGAGCAC..... 1 18
.....GACACGAGAGAGAGCACG..... 6 19
.....GACACGAGAGAGAGCACG..... 725 20
.....GACACGAGAGAGAGCACGCC..... 2 21
.....ACACGAGAGAGAGCACG..... 1 18
.....ACACGAGAGAGAGCACG..... 204 19
.....ACACGAGAGAGAGCACGCC..... 1 20
.....ACACGAGAGAGAGCACGCC..... 4 21
.....CAACGAGAGAGAGCACGCCG..... 6 21
.....AACGAGAGAGAGCACGCC..... 1 18
.....AACGAGAGAGAGCACGCCG..... 1 20
.....AACGAGAGAGAGCACGCCGGT..... 15 21
.....GGCTACTCGCTGCTTCTC..... 2 21

```

```

>osa-miR395p_MIMAT0003873_Oryza_sativa_miR395p
TTGGCATTGCTGAGTCCCTCAAGCACTCAGCTGCACATTTCAATGCGTACCGTGTGAAGTGTGGGGAACTCTCGCATCACCACAACTTAAATAATAGTGTAAAGCCACAATTTGAGTGAAGTCA
*****GTGAAGTGTGGGGAACTCT*****
.....GTTCCCTCAAGCACTCAGC..... 18 21
.....GTTCCCTCAAGCACTCAGCTGG..... 1 24
.....ACCGTGTGAAGTGTGGGGAA..... 1 22
.....TGAAGTGTGGGGAACTC..... 8 20
.....AGTGTGGGGAACTCTCGCAT..... 2 24
.....TGGGGAACTCTCGCATCACC..... 1 24
.....GGGGAACTCTCGCATCACC..... 1 23
.....GGGGAACTCTCGCATCACC..... 1 24
.....GGGGAACTCTCGCATCACC..... 1 25

```

```

>osa-miR395w_MIMAT0003877_Oryza_sativa_miR395w
TTGCTATTCTTGAGTCTCTTAATCATTACATGGCACTATTTAAGGCTACTGTGTGAAGTGTGGGGAACTCTCGGTATCACCATAAGTATGTTTCAAGCTATAAGAGATGGACCACTGTTGCAAGCCTA
*****GTGAAGTGTGGGGAACTCT*****
.....GGCCTACTGTGAGTGTGGG..... 1 24

```

```

>osa-miR806a_MIMAT0004026_Oryza_sativa_miR806a
CATGTACACATATAGTTTACGTATTTCAAAAAAATTTAATAAGCAAGCGTTAAACATGTCTAAAAAGTCAACGGTGCACAACTTTAAAACGAGGGAGTATTTGATTTGTGATGAAATGCATATATGCAAG
*****ATGTCTAAAAAGTCAACGGT*****
.....AAAAAATTTAATAAGCAAGC..... 2 24
.....AAAAAATTTAATAAGCAAGCG..... 1 24
.....AAAAAATTTAATAAGCAAGCG..... 1 23
.....TTAATAAGCAAGCGTTAA..... 3 21
.....TTAATAAGCAAGCGTTAAACAT..... 7 24
.....TAATAAGCAAGCGTTAAACAT..... 1 23
.....AATAAGCAAGCGTTAAAC..... 1 19
.....AATAAGCAAGCGTTAAAC..... 2 20
.....AATAAGCAAGCGTTAAACA..... 18 21
.....AATAAGCAAGCGTTAAACAT..... 9 22
.....AATAAGCAAGCGTTAAACATG..... 10 23
.....AATAAGCAAGCGTTAAACATGT..... 30 24
.....ATAAGCAAGCGTTAAAC..... 1 19
.....ATAAGCAAGCGTTAAACA..... 4 20
.....ATAAGCAAGCGTTAAACAT..... 20 21
.....ATAAGCAAGCGTTAAACATG..... 14 22
.....ATAAGCAAGCGTTAAACATGT..... 3 23
.....ATAAGCAAGCGTTAAACATGTG..... 25 24
.....TAAGCAAGCGTTAAACAT..... 1 20
.....TAAGCAAGCGTTAAACATG..... 4 21
.....TAAGCAAGCGTTAAACATGT..... 1 22
.....TAAGCAAGCGTTAAACATGTG..... 1 23
.....TAAGCAAGCGTTAAACATGTGC..... 5 24
.....AAGCAAGCGTTAAACATGTG..... 4 22
.....AAGCAAGCGTTAAACATGTGC..... 2 23
.....AAGCAAGCGTTAAACATGTGCT..... 40 24
.....AAGCAAGCGTTAAACATGTGCTAA..... 1 26
.....AGCAAGCGTTAAACATGTG..... 1 21
.....AGCAAGCGTTAAACATGTGCT..... 1 22
.....AGCAAGCGTTAAACATGTGCT..... 1 23
.....AGCAAGCGTTAAACATGTGCTA..... 53 24
.....AGCAAGCGTTAAACATGTGCTAA..... 1 25
.....GACGACGTTAAACATGTGCTA..... 1 21
.....GACGACGTTAAACATGTGCTA..... 2 23
.....GACGACGTTAAACATGTGCTAA..... 45 24
.....ACGACGTTAAACATGTGCT..... 1 20
.....ACGACGTTAAACATGTGCT..... 2 21
.....ACGACGTTAAACATGTGCTAA..... 11 24
.....CGAAGTTAAACATGTGCTA..... 1 21
.....CGAAGTTAAACATGTGCTA..... 1 23
.....AAGGTTAAACATGTGCTAAAA..... 1 23
.....ACGGTTAAACATGTGCTAAAAAGT..... 1 24
.....AAACATGTGCTAAAAAGT..... 1 19
.....AAACATGTGCTAAAAAGTCAA..... 1 21
.....AAACATGTGCTAAAAAGTCAACGG..... 110 24
.....AAACATGTGCTAAAAAGTCAACGG..... 3 23
.....AAACATGTGCTAAAAAGTCAACGGT..... 70 24
.....ACATGTGCTAAAAAGTCAACGGT..... 6 23

```



```

.....ACATGTGCTAAAAAGTCAACGGT..... 15 24
.....CATGTGCTAAAAAGTCAACGG..... 1 21
.....CATGTGCTAAAAAGTCAACGGTG..... 4 23
.....CATGTGCTAAAAAGTCAACGGTGT..... 4 24
.....ATGTGCTAAAAAGTCAACGGT..... 3 21
.....ATGTGCTAAAAAGTCAACGGTGT..... 2 23
.....ATGTGCTAAAAAGTCAACGGTGTCA..... 23 24
.....ATGTGCTAAAAAGTCAACGGTGTCAA..... 1 26
.....TGTGCTAAAAAGTCAACGGT..... 1 20
.....TGTGCTAAAAAGTCAACGGTG..... 43 21
.....TGTGCTAAAAAGTCAACGGTGT..... 4 22
.....GTGCTAAAAAGTCAACGGTG..... 3 20
.....GTGCTAAAAAGTCAACGGTGTCAA..... 4 24
.....TGTCTAAAAAGTCAACGGTGT..... 3 20
.....TGTCTAAAAAGTCAACGGTGTCT..... 5 21
.....TGTCTAAAAAGTCAACGGTGTCA..... 1 22
.....TGTCTAAAAAGTCAACGGTGTCAA..... 2 23
.....TGTCTAAAAAGTCAACGGTGTCAAA..... 1 24
.....GCTAAAAAGTCAACGGTG..... 1 18
.....GCTAAAAAGTCAACGGTGTCAA..... 1 22
.....GCTAAAAAGTCAACGGTGTCAAA..... 1 23
.....GCTAAAAAGTCAACGGTGTCAAAC..... 6 24
.....CTAAAAAGTCAACGGTGTCAA..... 5 21
.....CTAAAAAGTCAACGGTGTCAAA..... 2 22
.....TAAAAAGTCAACGGTGTCAA..... 7 21
.....TAAAAAGTCAACGGTGTCAACAT..... 8 24
.....AAAAAGTCAACGGTGTCAA..... 1 20
.....AAAAAGTCAACGGTGTCAAAC..... 3 21
.....AAAAAGTCAACGGTGTCAAAACA..... 5 22
.....AAAAAGTCAACGGTGTCAACAT..... 7 23
.....AAAAAGTCAACGGTGTCAACATT..... 120 24
.....AAAAAGTCAACGGTGTCAAAC..... 1 20
.....AAAAAGTCAACGGTGTCAAAACA..... 4 21
.....AAAAAGTCAACGGTGTCAACAT..... 4 23
.....AAAAAGTCAACGGTGTCAACATT..... 22 24
.....AAAAAGTCAACGGTGTCAAA..... 1 18
.....AAAGTCAACGGTGTCAAAC..... 2 19
.....AAAGTCAACGGTGTCAAAACA..... 2 20
.....AAAGTCAACGGTGTCAACAT..... 8 21
.....AAAGTCAACGGTGTCAACATT..... 4 22
.....AAAGTCAACGGTGTCAACATT..... 14 23
.....AAAGTCAACGGTGTCAACATT..... 4 24
.....AAGTCAACGGTGTCAACAT..... 3 20
.....AAGTCAACGGTGTCAACATT..... 8 21
.....AAGTCAACGGTGTCAACATT..... 1 22
.....AAGTCAACGGTGTCAACATT..... 3 23
.....AACGGTGTCAACATTAAAAACG..... 1 24
.....AACGGTGTCAACATTAAAAACGG..... 8 24
.....AACGGTGTCAACATTAAAAACGGAG..... 13 24
.....TGTCAACATTAAAAACGGAG..... 1 22
.....GTCAACATTAAAAACGGAGGGA..... 11 24
.....CAACATTAAAAACGGAGGAGT..... 1 24
.....ACATTTAAAAACGGAGGAGT..... 1 21

```

```

>osa-miR806b_MIMAT0004027_Oryza_sativa_miR806b
ATGTACACATATAATTTTACATATTTTCAAAATTTTTTAAATAAGACGAACAGTCAAGAATGTCTAAAAAGTCAACGGTGTCAACAGTTTGAACGGATGAAGTACTAAGCATGTATGGGAATGGCATGTTTCCAAAGT
*****ATGTGCTAAAAAGTCAACGGTG*****
.....ATATAATTTTACATATTTTCAAA..... 1 23
.....ATATAATTTTACATATTTTCAAA..... 1 24
.....ATGTGCTAAAAAGTCAACGGT..... 3 21
.....ATGTGCTAAAAAGTCAACGGTGT..... 2 23
.....ATGTGCTAAAAAGTCAACGGTGTCA..... 23 24
.....ATGTGCTAAAAAGTCAACGGTGTCAA..... 1 26
.....TGTGCTAAAAAGTCAACGGT..... 1 20
.....TGTGCTAAAAAGTCAACGGTG..... 43 21
.....TGTGCTAAAAAGTCAACGGTGT..... 4 22
.....GTGCTAAAAAGTCAACGGTG..... 3 20
.....GTGCTAAAAAGTCAACGGTGTCAA..... 4 24
.....TGTCTAAAAAGTCAACGGTGT..... 3 20
.....TGTCTAAAAAGTCAACGGTGTCT..... 5 21
.....TGTCTAAAAAGTCAACGGTGTCA..... 1 22
.....TGTCTAAAAAGTCAACGGTGTCAA..... 2 23
.....TGTCTAAAAAGTCAACGGTGTCAAA..... 1 24
.....GCTAAAAAGTCAACGGTG..... 1 18
.....GCTAAAAAGTCAACGGTGTCAA..... 1 22
.....GCTAAAAAGTCAACGGTGTCAAA..... 1 23
.....GCTAAAAAGTCAACGGTGTCAAAC..... 6 24
.....CTAAAAAGTCAACGGTGTCAA..... 5 21
.....CTAAAAAGTCAACGGTGTCAAA..... 2 22
.....TAAAAAGTCAACGGTGTCAA..... 7 21
.....TAAAAAGTCAACGGTGTCAA..... 1 20
.....AAAAAGTCAACGGTGTCAAAC..... 3 21
.....AAAAAGTCAACGGTGTCAAAACA..... 5 22
.....AAAAAGTCAACGGTGTCAAAC..... 1 20
.....AAAAAGTCAACGGTGTCAAAACA..... 4 21
.....AAAGTCAACGGTGTCAAA..... 1 18
.....AAAGTCAACGGTGTCAAAC..... 2 19
.....AAAGTCAACGGTGTCAAAACA..... 2 20
.....GTCAAACAGTTTGAACGGA..... 1 20

```

```

>osa-miR806c_MIMAT0004028_Oryza_sativa_miR806c
ATGTACACATATAGTTTACATATTTTCAAAATTTTTTGAATAAGACGAATGTTCAACATGTCTAAAAAGTCAACGGTGTCAACATTTCGAAACGGATGGAGTATTTTGTAACTTTATAAGAAAAGGGAAAAAAA
*****ATGTGCTAAAAAGTCAACGGTG*****
.....ATAAAATTTTTGAATAAGACGAA..... 2 24
.....AAAAATTTTTGAATAAGACGAA..... 2 22
.....AAAAATTTTTGAATAAGACGAAT..... 2 23
.....AAAAATTTTTGAATAAGACGAATG..... 1 24
.....AAAAATTTTTGAATAAGACGAAT..... 2 22
.....AAAAATTTTTGAATAAGACGAATG..... 7 23
.....AAAAATTTTTGAATAAGACGAATGG..... 4 24
.....AATTTTTTGAATAAGACGAAT..... 23 21
.....AATTTTTTGAATAAGACGAATG..... 3 22
.....AATTTTTTGAATAAGACGAATGG..... 1 23
.....AATTTTTTGAATAAGACGAATGGT..... 5 24
.....ATTTTTTGAATAAGACGAATG..... 2 21
.....ATTTTTTGAATAAGACGAATGG..... 1 22
.....TTTTTTGAATAAGACGAA..... 1 18
.....TTTTTTGAATAAGACGAATG..... 3 20
.....TTTTTTGAATAAGACGAATGG..... 15 21
.....TTTTTTGAATAAGACGAATGGT..... 4 22

```

|                             |     |    |
|-----------------------------|-----|----|
| TTTTTGAATAAGCGAATGGTCA      | 1   | 24 |
| TTTTTGAATAAGCGAAT           | 1   | 18 |
| TTTTTGAATAAGCGAATG          | 2   | 19 |
| TTTTTGAATAAGCGAATGG         | 3   | 20 |
| TTTTTGAATAAGCGAATGGT        | 13  | 21 |
| TTTTTGAATAAGCGAATGGTCAA     | 5   | 24 |
| TTTTTGAATAAGCGAATGGG        | 1   | 19 |
| TTTTTGAATAAGCGAATGGT        | 1   | 20 |
| TTTTTGAATAAGCGAATGGTCAA     | 2   | 23 |
| TTTTTGAATAAGCGAATGGTCAAA    | 2   | 24 |
| TTTTGAATAAGCGAATGGTCA       | 1   | 20 |
| TTTTGAATAAGCGAATGGTCA       | 48  | 21 |
| TTTTGAATAAGCGAATGGTCAA      | 4   | 22 |
| TTTTGAATAAGCGAATGGTCAA      | 1   | 23 |
| TTTTGAATAAGCGAATGGTCAAAC    | 4   | 24 |
| TTGAATAAGCGAATGGT           | 1   | 18 |
| TTGAATAAGCGAATGGTCA         | 1   | 20 |
| TTGAATAAGCGAATGGTCAA        | 10  | 21 |
| TTGAATAAGCGAATGGTCAAA       | 2   | 22 |
| TTGAATAAGCGAATGGTCAAACA     | 8   | 24 |
| TGAATAAGCGAATGGTCAAA        | 1   | 21 |
| TGAATAAGCGAATGGTCAAACA      | 9   | 23 |
| TGAATAAGCGAATGGTCAAACAT     | 35  | 24 |
| TGAATAAGCGAATGGTCAAACATG    | 1   | 25 |
| GAATAAGCGAATGGTCAAACATG     | 3   | 24 |
| .AATAAGCGAATGGTCAAAC        | 1   | 19 |
| .AATAAGCGAATGGTCAAACA       | 28  | 21 |
| .AATAAGCGAATGGTCAAACAT      | 2   | 22 |
| .AATAAGCGAATGGTCAAACATGT    | 2   | 24 |
| .ATAAGCGAATGGTCAAAC         | 1   | 18 |
| .ATAAGCGAATGGTCAAACA        | 13  | 20 |
| .ATAAGCGAATGGTCAAACAT       | 58  | 21 |
| .ATAAGCGAATGGTCAAACATG      | 17  | 22 |
| .ATAAGCGAATGGTCAAACATGT     | 2   | 23 |
| .ATAAGCGAATGGTCAAACATGTG    | 6   | 24 |
| .TAAGCGAATGGTCAAACA         | 1   | 19 |
| .TAAGCGAATGGTCAAACAT        | 9   | 20 |
| .TAAGCGAATGGTCAAACATG       | 2   | 21 |
| .TAAGCGAATGGTCAAACATGT      | 1   | 22 |
| .TAAGCGAATGGTCAAACATGTG     | 1   | 24 |
| .ACAGCAATGGTCAAACATGTG      | 4   | 21 |
| .GACGAATGGTCAAACATGTGCTA    | 1   | 23 |
| .ATGGTCAAACATGTGCTAAAAAGT   | 2   | 24 |
| .GGTCAAACATGTGCTAAAAAGTCA   | 1   | 24 |
| .GTCAAACATGTGCTAAAAAGTCA    | 1   | 23 |
| .CAAACATGTGCTAAAAAGTCAACGG  | 1   | 25 |
| .AAACATGTGCTAAAAAGTCA       | 1   | 19 |
| .AAACATGTGCTAAAAAGTCAA      | 1   | 21 |
| .AAACATGTGCTAAAAAGTCAACGG   | 110 | 24 |
| .AACATGTGCTAAAAAGTCAACGG    | 3   | 23 |
| .AACATGTGCTAAAAAGTCAACGGT   | 70  | 24 |
| .ACATGTGCTAAAAAGTCAACGGT    | 6   | 23 |
| .ACATGTGCTAAAAAGTCAACGGTG   | 15  | 24 |
| .CATGTGCTAAAAAGTCAACGG      | 1   | 21 |
| .CATGTGCTAAAAAGTCAACGGTG    | 4   | 23 |
| .CATGTGCTAAAAAGTCAACGGTGT   | 4   | 24 |
| .ATGTGCTAAAAAGTCAACGGT      | 3   | 21 |
| .ATGTGCTAAAAAGTCAACGGTGT    | 2   | 23 |
| .ATGTGCTAAAAAGTCAACGGTGTCA  | 23  | 24 |
| .ATGTGCTAAAAAGTCAACGGTGTCAA | 1   | 26 |
| .TGTGCTAAAAAGTCAACGGT       | 1   | 20 |
| .TGTGCTAAAAAGTCAACGGTG      | 43  | 21 |
| .TGTGCTAAAAAGTCAACGGTGT     | 4   | 22 |
| .GTGCTAAAAAGTCAACGGTGT      | 3   | 20 |
| .GTGCTAAAAAGTCAACGGTGTCAA   | 4   | 24 |
| .TGCTAAAAAGTCAACGGTGT       | 3   | 20 |
| .TGCTAAAAAGTCAACGGTGTCA     | 5   | 21 |
| .TGCTAAAAAGTCAACGGTGTCAA    | 1   | 22 |
| .TGCTAAAAAGTCAACGGTGTCAA    | 2   | 23 |
| .TGCTAAAAAGTCAACGGTGTCAA    | 1   | 24 |
| .GCTAAAAAGTCAACGGTGT        | 1   | 18 |
| .GCTAAAAAGTCAACGGTGTCAA     | 1   | 22 |
| .GCTAAAAAGTCAACGGTGTCAA     | 1   | 23 |
| .GCTAAAAAGTCAACGGTGTCAAAC   | 6   | 24 |
| .CTAAAAAGTCAACGGTGTCAA      | 5   | 21 |
| .CTAAAAAGTCAACGGTGTCAA      | 2   | 22 |
| .TAAAAAGTCAACGGTGTCAA       | 7   | 21 |
| .TAAAAAGTCAACGGTGTCAAACAT   | 8   | 24 |
| .AAAAAGTCAACGGTGTCAA        | 1   | 20 |
| .AAAAAGTCAACGGTGTCAAAC      | 3   | 21 |
| .AAAAAGTCAACGGTGTCAAACA     | 5   | 22 |
| .AAAAAGTCAACGGTGTCAAACAT    | 7   | 23 |
| .AAAAAGTCAACGGTGTCAAACATT   | 120 | 24 |
| .AAAAAGTCAACGGTGTCAAAC      | 1   | 20 |
| .AAAAAGTCAACGGTGTCAAACA     | 4   | 21 |
| .AAAAAGTCAACGGTGTCAAACATT   | 4   | 23 |
| .AAAAAGTCAACGGTGTCAAACATTT  | 22  | 24 |
| .AAAGTCAACGGTGTCAA          | 1   | 18 |
| .AAAGTCAACGGTGTCAAAC        | 2   | 19 |
| .AAAGTCAACGGTGTCAAACA       | 2   | 20 |
| .AAAGTCAACGGTGTCAAACAT      | 8   | 21 |
| .AAAGTCAACGGTGTCAAACATT     | 4   | 22 |
| .AAAGTCAACGGTGTCAAACATTT    | 14  | 23 |
| .AAAGTCAACGGTGTCAAACATTTTC  | 5   | 24 |
| .AAGTCAACGGTGTCAAACAT       | 3   | 20 |
| .AAGTCAACGGTGTCAAACATT      | 8   | 21 |
| .AAGTCAACGGTGTCAAACATTT     | 1   | 22 |
| .AAGTCAACGGTGTCAAACATTTTC   | 2   | 23 |
| .AAGTCAACGGTGTCAAACATTTTCG  | 2   | 24 |
| .AGTCAACGGTGTCAAACATTTTCGA  | 4   | 24 |
| .GTCAACGGTGTCAAACATTTTCGAA  | 2   | 24 |
| .AACGGTGTCAAACATTTTCGAA     | 1   | 21 |
| .AACGGTGTCAAACATTTTCGAAACG  | 1   | 24 |
| .AACGGTGTCAAACATTTTCGAAACGG | 1   | 25 |
| .ACGGTGTCAAACATTTTCGAAA     | 1   | 21 |
| .ACGGTGTCAAACATTTTCGAAACG   | 1   | 23 |
| .ACGGTGTCAAACATTTTCGAAACGG  | 30  | 24 |
| .CGGTGTCAAACATTTTCGAAACGG   | 1   | 23 |
| .GGTGTCAAACATTTTCGAAACGGAT  | 2   | 24 |
| .TGTCAAACATTTTCGAAACGGGA    | 5   | 21 |
| .TGTCAAACATTTTCGAAACGGAT    | 1   | 22 |
| .GTCAAACATTTTCGAAACGGGA     | 1   | 20 |

```

.....AAACATTTGAAACGGATGGA..... 1 21
.....AAACATTTGAAACGGATGGAG..... 1 22
.....AAACATTTGAAACGGATGGAGT..... 1 23
.....ACATTTGAAACGGATGG..... 1 18

```

>osa-miR806d\_MIMAT0004029\_Oryza\_sativa\_miR806d

```

ATATGCACATATAGTTTACATATTTTCAAAATTTTTAGATAAAGCTAACGGTCAAAACATGTCTAAAAAGTCAACGGTGTCAAAATTTTAAACGGAGGGAGTATAAGGGATTTAGTGGATGTAATTCCTTTATA
*****ATGTGCTAAAAAGTCAACGGT*****
.....ACATATAGTTTACATATTTTCA..... 2 24
.....AGACTAACGGTCAAAACATGTCTA..... 1 24
.....AACCAGTCAAAACATGTCTA..... 3 21
.....AACCAGTCAAAACATGTCTA..... 1 22
.....AACCAGTCAAAACATGTCTA..... 2 23
.....AACCAGTCAAAACATGTCTA..... 4 24
.....AACCAGTCAAAACATGTCTA..... 3 21
.....AACCAGTCAAAACATGTCTA..... 8 24
.....CGGTCAAAACATGTCTA..... 1 24
.....GGTCAAAACATGTCTA..... 1 24
.....GTCAAAACATGTCTA..... 1 23
.....CAAAACATGTCTA..... 1 25
.....AAACATGTCTA..... 1 19
.....AAACATGTCTA..... 1 21
.....AAACATGTCTA..... 110 24
.....AAACATGTCTA..... 3 23
.....AAACATGTCTA..... 70 24
.....ACATGTCTA..... 6 23
.....ACATGTCTA..... 15 24
.....CATGTCTA..... 1 21
.....CATGTCTA..... 4 23
.....CATGTCTA..... 4 24
.....ATGTCTA..... 3 21
.....ATGTCTA..... 2 23
.....ATGTCTA..... 23 24
.....ATGTCTA..... 1 26
.....TGCTCAAAAGTCAACGGT..... 1 20
.....TGCTCAAAAGTCAACGGT..... 43 21
.....TGCTCAAAAGTCAACGGT..... 4 22
.....TGCTCAAAAGTCAACGGT..... 3 20
.....TGCTCAAAAGTCAACGGTCAAA..... 4 24
.....TGCTCAAAAGTCAACGGTGT..... 3 20
.....TGCTCAAAAGTCAACGGTGTCA..... 5 21
.....TGCTCAAAAGTCAACGGTGTCA..... 1 22
.....TGCTCAAAAGTCAACGGTGTCA..... 2 23
.....TGCTCAAAAGTCAACGGTGTCA..... 1 24
.....GCTCAAAAGTCAACGGT..... 1 18
.....GCTCAAAAGTCAACGGTGTCA..... 1 22
.....GCTCAAAAGTCAACGGTGTCA..... 1 23
.....GCTCAAAAGTCAACGGTGTCA..... 1 23
.....GCTCAAAAGTCAACGGTGTCA..... 6 24
.....CTAAAGTCAACGGTGTCA..... 5 21
.....CTAAAGTCAACGGTGTCA..... 2 22
.....TAAAGTCAACGGTGTCA..... 7 21
.....TAAAGTCAACGGTGTCAACAT..... 8 24
.....AAAAAGTCAACGGTGTCA..... 1 20
.....AAAAAGTCAACGGTGTCAAC..... 3 21
.....AAAAAGTCAACGGTGTCAACA..... 5 22
.....AAAAAGTCAACGGTGTCAACAT..... 7 23
.....AAAAAGTCAACGGTGTCAACATT..... 120 24
.....AAAAAGTCAACGGTGTCAAC..... 1 20
.....AAAAAGTCAACGGTGTCAACA..... 4 21
.....AAAAAGTCAACGGTGTCAACATT..... 4 23
.....AAAAAGTCAACGGTGTCAACATT..... 22 24
.....AAAGTCAACGGTGTCA..... 1 18
.....AAAGTCAACGGTGTCAAC..... 2 19
.....AAAGTCAACGGTGTCAACA..... 2 20
.....AAAGTCAACGGTGTCAACAT..... 8 21
.....AAAGTCAACGGTGTCAACATT..... 4 22
.....AAAGTCAACGGTGTCAACATT..... 14 23
.....AAAGTCAACGGTGTCAACATT..... 4 24
.....AAGTCAACGGTGTCAACAT..... 3 20
.....AAGTCAACGGTGTCAACATT..... 8 21
.....AAGTCAACGGTGTCAACATT..... 1 22
.....AAGTCAACGGTGTCAACATT..... 3 23
.....AACGGTGTCAACATTTTAAACG..... 1 24
.....ACGGTGTCAACATTTTAAACGG..... 8 24
.....GGTGTCAACATTTTAAACGGAG..... 13 24
.....TGTCAACATTTTAAACGGAG..... 1 22
.....GTCAACATTTTAAACGGAGGA..... 11 24
.....CAACATTTTAAACGGAGGAGT..... 1 24
.....ACATTTTAAACGGAGGAGT..... 1 21
.....CATTTTAAACGGAGGAGTATA..... 1 23
.....TATAAGGGATTTAGTGGAT..... 1 21
.....ATAAGGGATTTAGTGGATG..... 1 22

```

>osa-miR806e\_MIMAT0004030\_Oryza\_sativa\_miR806e

```

ATGTAGGCATATAATTTTACATATTTTCAAAAGTTTTTAAATAAAGCAACGGTCAAAACATGTCTAAAAAGTCAACGGTGTCAAAATTTTAAACGGAGGGAGTGTGGTTAGTGTCTAGAGTACGATCATCGGAGG
*****ATGTGCTAAAAAGTCAACGGT*****
ATGTAGGCATATAATTTTACATATTTTCAAA..... 2 21
.....ATATAATTTTACATATTTTCAAA..... 1 23
.....ATATAATTTTACATATTTTCAAAA..... 1 24
.....ACAAAAGTTTTTAAATAAAGCAAA..... 2 24
.....AAAAGTTTTTAAATAAAGCAAGC..... 1 24
.....GTTTTTAAATAAAGCAACGGTCA..... 1 24
.....TTTTTAAATAAAGCAAGCG..... 2 20
.....TTTTTAAATAAAGCAACGGT..... 5 21
.....TTTTTAAATAAAGCAACGGTCA..... 1 23
.....TTTTTAAATAAAGCAACGGT..... 1 20
.....TTTTTAAATAAAGCAACGGTCAAA..... 3 24
.....TTAAATAAAGCAACGGTCAAA..... 3 24
.....TAAATAAAGCAACGGTCAAA..... 1 23
.....TAAATAAAGCAACGGTCAAA..... 10 24
.....AAATAAAGCAACGGTCAAA..... 1 20
.....AAATAAAGCAACGGTCAAA..... 5 21
.....AAATAAAGCAACGGTCAAA..... 26 22
.....AAATAAAGCAACGGTCAAA..... 4 23
.....AAATAAAGCAACGGTCAAA..... 58 24
.....AATAAGCAACGGTCAAA..... 3 20
.....AATAAGCAACGGTCAAA..... 162 21
.....AATAAGCAACGGTCAAA..... 31 22
.....AATAAGCAACGGTCAAA..... 26 23
.....AATAAGCAACGGTCAAA..... 48 24

```

|                                      |     |    |
|--------------------------------------|-----|----|
| .....ATAAAGCGAAGGTCAAACATGTG.....    | 3   | 25 |
| .....ATAAAGCGAAGGTCAAA.....          | 2   | 18 |
| .....ATAAAGCGAAGGTCAAAC.....         | 3   | 19 |
| .....ATAAAGCGAAGGTCAAACA.....        | 18  | 20 |
| .....ATAAAGCGAAGGTCAAACAT.....       | 60  | 21 |
| .....ATAAAGCGAAGGTCAAACATG.....      | 83  | 22 |
| .....ATAAAGCGAAGGTCAAACATGT.....     | 23  | 23 |
| .....ATAAAGCGAAGGTCAAACATGTG.....    | 69  | 24 |
| .....TAAGCGAAGGTCAAAC.....           | 1   | 18 |
| .....TAAGCGAAGGTCAAACA.....          | 1   | 19 |
| .....TAAGCGAAGGTCAAACAT.....         | 2   | 20 |
| .....TAAGCGAAGGTCAAACATG.....        | 14  | 21 |
| .....TAAGCGAAGGTCAAACATGT.....       | 2   | 22 |
| .....TAAGCGAAGGTCAAACATGTG.....      | 10  | 23 |
| .....TAAGCGAAGGTCAAACATGTGC.....     | 19  | 24 |
| .....AAGCGAAGGTCAAACA.....           | 1   | 18 |
| .....AAGCGAAGGTCAAACAT.....          | 3   | 19 |
| .....AAGCGAAGGTCAAACATG.....         | 3   | 20 |
| .....AAGCGAAGGTCAAACATGT.....        | 1   | 21 |
| .....AAGCGAAGGTCAAACATGTG.....       | 11  | 22 |
| .....AAGCGAAGGTCAAACATGTGC.....      | 8   | 23 |
| .....AAGCGAAGGTCAAACATGTGCT.....     | 59  | 24 |
| .....AGCGAAGGTCAAACATGTG.....        | 12  | 21 |
| .....AGCGAAGGTCAAACATGTGC.....       | 5   | 22 |
| .....AGCGAAGGTCAAACATGTGCT.....      | 1   | 23 |
| .....AGCGAAGGTCAAACATGTGCTA.....     | 54  | 24 |
| .....AGCGAAGGTCAAACATGTGCTAA.....    | 1   | 25 |
| .....GACGAAGGTCAAACATGTG.....        | 2   | 20 |
| .....GACGAAGGTCAAACATGTGCTA.....     | 1   | 23 |
| .....GACGAAGGTCAAACATGTGCTAA.....    | 4   | 24 |
| .....ACGAAGGTCAAACATGTGCT.....       | 5   | 21 |
| .....ACGAAGGTCAAACATGTGCTA.....      | 1   | 22 |
| .....ACGAAGGTCAAACATGTGCTAA.....     | 7   | 23 |
| .....ACGAAGGTCAAACATGTGCTAAA.....    | 11  | 24 |
| .....CGAAGGTCAAACATGTGCTA.....       | 8   | 21 |
| .....CGAAGGTCAAACATGTGCTAA.....      | 1   | 22 |
| .....CGAAGGTCAAACATGTGCTAAA.....     | 1   | 23 |
| .....CGAAGGTCAAACATGTGCTAAAA.....    | 4   | 24 |
| .....GAAGGTCAAACATGTGCTA.....        | 1   | 20 |
| .....GAAGGTCAAACATGTGCTAA.....       | 2   | 21 |
| .....AACGGTCAAACATGTGCTAAA.....      | 3   | 21 |
| .....AACGGTCAAACATGTGCTAAAA.....     | 1   | 22 |
| .....AACGGTCAAACATGTGCTAAAAA.....    | 2   | 23 |
| .....AACGGTCAAACATGTGCTAAAAAG.....   | 4   | 24 |
| .....ACGGTCAAACATGTGCTAAAA.....      | 3   | 21 |
| .....ACGGTCAAACATGTGCTAAAAAGT.....   | 8   | 24 |
| .....CGTCAAAACATGTGCTAAAAAGTC.....   | 1   | 24 |
| .....GGTCAAAACATGTGCTAAAAAGTCA.....  | 1   | 24 |
| .....GTCAAAACATGTGCTAAAAAGTCA.....   | 1   | 23 |
| .....CAAAACATGTGCTAAAAAGTCAACGG..... | 1   | 25 |
| .....AAACATGTGCTAAAAAGTCA.....       | 1   | 19 |
| .....AAACATGTGCTAAAAAGTCAA.....      | 1   | 21 |
| .....AAACATGTGCTAAAAAGTCAACGG.....   | 110 | 24 |
| .....AACATGTGCTAAAAAGTCAACGG.....    | 3   | 23 |
| .....AACATGTGCTAAAAAGTCAACGGT.....   | 70  | 24 |
| .....ACATGTGCTAAAAAGTCAACGGT.....    | 6   | 23 |
| .....ACATGTGCTAAAAAGTCAACGGTG.....   | 15  | 24 |
| .....CATGTGCTAAAAAGTCAACGG.....      | 1   | 21 |
| .....CATGTGCTAAAAAGTCAACGGTG.....    | 4   | 23 |
| .....CATGTGCTAAAAAGTCAACGGTGT.....   | 4   | 24 |
| .....ATGTGCTAAAAAGTCAACGGT.....      | 3   | 21 |
| .....ATGTGCTAAAAAGTCAACGGTGT.....    | 2   | 23 |
| .....ATGTGCTAAAAAGTCAACGGTGTG.....   | 23  | 24 |
| .....ATGTGCTAAAAAGTCAACGGTGTCAA..... | 1   | 26 |
| .....TGTGCTAAAAAGTCAACGGT.....       | 1   | 20 |
| .....TGTGCTAAAAAGTCAACGGTG.....      | 4   | 21 |
| .....TGTGCTAAAAAGTCAACGGTGT.....     | 4   | 22 |
| .....TGTGCTAAAAAGTCAACGGTG.....      | 3   | 20 |
| .....GTGCTAAAAAGTCAACGGTGTCAA.....   | 4   | 24 |
| .....TGTAAAAAGTCAACGGTGT.....        | 3   | 20 |
| .....TGTAAAAAGTCAACGGTGTG.....       | 5   | 21 |
| .....TGTAAAAAGTCAACGGTGTCA.....      | 1   | 22 |
| .....TGTAAAAAGTCAACGGTGTCAA.....     | 2   | 23 |
| .....TGTAAAAAGTCAACGGTGTCAA.....     | 1   | 24 |
| .....GCTAAAAAGTCAACGGTGTCAA.....     | 1   | 18 |
| .....GCTAAAAAGTCAACGGTGTCAA.....     | 1   | 22 |
| .....GCTAAAAAGTCAACGGTGTCAA.....     | 1   | 23 |
| .....GCTAAAAAGTCAACGGTGTCAAAT.....   | 3   | 24 |
| .....CTAAAAAGTCAACGGTGTCAA.....      | 5   | 21 |
| .....CTAAAAAGTCAACGGTGTCAA.....      | 2   | 22 |
| .....TAAAAAGTCAACGGTGTCAA.....       | 7   | 21 |
| .....TAAAAAGTCAACGGTGTCAAAT.....     | 1   | 22 |
| .....TAAAAAGTCAACGGTGTCAAATAT.....   | 2   | 24 |
| .....AAAAAGTCAACGGTGTCAA.....        | 1   | 20 |
| .....AAAAAGTCAACGGTGTCAAAT.....      | 3   | 21 |
| .....AAAAAGTCAACGGTGTCAAATA.....     | 2   | 22 |
| .....AAAAAGTCAACGGTGTCAAATTT.....    | 22  | 24 |
| .....AAAAAGTCAACGGTGTCAAATA.....     | 2   | 21 |
| .....AAAAAGTCAACGGTGTCAA.....        | 1   | 18 |
| .....AAGTCAACGGTGTCAAATTTTCG.....    | 1   | 24 |
| .....AGTCAACGGTGTCAAATTTTC.....      | 1   | 21 |
| .....AGTCAACGGTGTCAAATTTTC.....      | 1   | 22 |
| .....GTCAACGGTGTCAAATTTTCGAA.....    | 2   | 24 |
| .....AACGGTGTCAAATTTTCGAAACG.....    | 2   | 24 |
| .....ACGGTGTCAAATTTTCGAAACGG.....    | 6   | 24 |
| .....TGTCAAATTTTCGAAACGGA.....       | 2   | 21 |
| .....TGTCAAATTTTCGAAACGGAGGG.....    | 1   | 24 |
| .....GTCAAATTTTCGAAACGGAGGG.....     | 1   | 23 |
| .....GTCAAATTTTCGAAACGGAGGGA.....    | 3   | 24 |
| .....CAAATTTTCGAAACGGAGGGAG.....     | 1   | 23 |
| .....AAATTTTCGAAACGGAGGG.....        | 2   | 20 |
| .....AAATTTTCGAAACGGAGGGA.....       | 1   | 21 |
| .....AATTTTCGAAACGGAGGGA.....        | 1   | 20 |
| .....ATTTTCGAAACGGAGGGAGT.....       | 1   | 21 |
| .....TTTCGAAACGGAGGGAGT.....         | 2   | 18 |

>osa-miR806f\_MIMAT0004031\_Oryza\_sativa\_miR806f

ATGTAGGCATATAATTTACATATTTTCAAAAAGTTTTGAATAAGACGAACAGTCAACATGTGCTAAAAAGTCAACGGTGTCAAATTTTCGAAACGGAGGGAGTAAAGCCTTTTACCTTCAAGATTCAAGATTGGT  
 \*\*\*\*\*ATGTGCTAAAAAGTCAACGGT\*\*\*\*\*  
 ATGTAGGCATATAATTTTACA.....  
 ..ATATAATTTTACATATTTTCATAA.....

osa-miR806f 22  
 2 21  
 1 23

|                                      |     |    |
|--------------------------------------|-----|----|
| .....TAATTTACATATTTCAAAAAG.....      | 1   | 23 |
| .....ATATTTTCATAAAAAGTTTTGAATA.....  | 3   | 24 |
| .....ATAAAAAGTTTTGAATAAAGCGA.....    | 1   | 23 |
| .....ATAAAAAGTTTTGAATAAAGCGAA.....   | 4   | 24 |
| .....TAAAAAGTTTTGAATAAAGCGAA.....    | 1   | 23 |
| .....AAAAAGTTTTGAATAAAGCGAA.....     | 1   | 22 |
| .....AAAAAGTTTTGAATAAAGCGAACA.....   | 5   | 24 |
| .....AAAAAGTTTTGAATAAAGCGAACA.....   | 1   | 23 |
| .....TTTTTGAATAAAGCGAAGCAG.....      | 1   | 20 |
| .....TTTTTGAATAAAGCGAAGCAGT.....     | 2   | 21 |
| .....TTTTTGAATAAAGCGAAGCAGTCAA.....  | 1   | 24 |
| .....TTTTTGAATAAAGCGAACA.....        | 1   | 18 |
| .....TTTTTGAATAAAGCGAAGCAGTCA.....   | 1   | 22 |
| .....TTGAATAAAGCGAAGCAGTCAAAAC.....  | 1   | 23 |
| .....TGAATAAAGCGAAGCAGTCAAAACAT..... | 3   | 24 |
| .....AATAAAGCGAAGCAGTCAAAACATGT..... | 2   | 24 |
| .....ATAAAGCGAAGCAGTCAAAAC.....      | 1   | 19 |
| .....ATAAAGCGAAGCAGTCAAAACAT.....    | 1   | 21 |
| .....ATAAAGCGAAGCAGTCAAAACATGTG..... | 1   | 24 |
| .....AGCAGAACAGTCAAAACATGTGCTA.....  | 1   | 24 |
| .....GTCAAAACATGTGCTAAAAAGTCA.....   | 1   | 23 |
| .....CAAAACATGTGCTAAAAAGTCAACGG..... | 1   | 25 |
| .....AAACATGTGCTAAAAAGTCA.....       | 1   | 19 |
| .....AAACATGTGCTAAAAAGTCAAA.....     | 1   | 21 |
| .....AAACATGTGCTAAAAAGTCAACGG.....   | 110 | 24 |
| .....AAACATGTGCTAAAAAGTCAACGG.....   | 3   | 23 |
| .....AAACATGTGCTAAAAAGTCAACGGT.....  | 70  | 24 |
| .....ACATGTGCTAAAAAGTCAACGGT.....    | 6   | 23 |
| .....ACATGTGCTAAAAAGTCAACGGTG.....   | 15  | 24 |
| .....CATGTGCTAAAAAGTCAACGG.....      | 1   | 21 |
| .....CATGTGCTAAAAAGTCAACGGTG.....    | 4   | 23 |
| .....CATGTGCTAAAAAGTCAACGGTGT.....   | 4   | 24 |
| .....ATGTGCTAAAAAGTCAACGGT.....      | 3   | 21 |
| .....ATGTGCTAAAAAGTCAACGGTGT.....    | 2   | 23 |
| .....ATGTGCTAAAAAGTCAACGGTGTCA.....  | 23  | 24 |
| .....ATGTGCTAAAAAGTCAACGGTGTCAA..... | 1   | 26 |
| .....TGTGCTAAAAAGTCAACGGT.....       | 1   | 20 |
| .....TGTGCTAAAAAGTCAACGGTG.....      | 43  | 21 |
| .....TGTGCTAAAAAGTCAACGGTGT.....     | 4   | 22 |
| .....GTGCTAAAAAGTCAACGGTG.....       | 3   | 20 |
| .....GTGCTAAAAAGTCAACGGTGTCAA.....   | 4   | 24 |
| .....TGCTAAAAAGTCAACGGTGT.....       | 3   | 20 |
| .....TGCTAAAAAGTCAACGGTGTCA.....     | 5   | 21 |
| .....TGCTAAAAAGTCAACGGTGTCA.....     | 1   | 22 |
| .....TGCTAAAAAGTCAACGGTGTCAA.....    | 2   | 23 |
| .....TGCTAAAAAGTCAACGGTGTCAAA.....   | 1   | 24 |
| .....GCTAAAAAGTCAACGGTG.....         | 1   | 18 |
| .....GCTAAAAAGTCAACGGTGTCAA.....     | 1   | 22 |
| .....GCTAAAAAGTCAACGGTGTCAA.....     | 1   | 23 |
| .....GCTAAAAAGTCAACGGTGTCAAAAT.....  | 3   | 24 |
| .....CTAAAAAGTCAACGGTGTCAA.....      | 5   | 21 |
| .....CTAAAAAGTCAACGGTGTCAA.....      | 2   | 22 |
| .....TAAAAAGTCAACGGTGTCAA.....       | 7   | 21 |
| .....TAAAAAGTCAACGGTGTCAAAAT.....    | 1   | 22 |
| .....TAAAAAGTCAACGGTGTCAAAATAT.....  | 2   | 24 |
| .....AAAAAGTCAACGGTGTCAA.....        | 1   | 20 |
| .....AAAAAGTCAACGGTGTCAAAAT.....     | 3   | 21 |
| .....AAAAAGTCAACGGTGTCAAAATA.....    | 2   | 22 |
| .....AAAAAGTCAACGGTGTCAAAATAT.....   | 22  | 24 |
| .....AAAAAGTCAACGGTGTCAAAATA.....    | 2   | 21 |
| .....AAAGTCAACGGTGTCAA.....          | 1   | 18 |
| .....AAAGTCAACGGTGTCAAAATTTG.....    | 1   | 24 |
| .....AGTCAACGGTGTCAAAATTTG.....      | 1   | 21 |
| .....AGTCAACGGTGTCAAAATTTTC.....     | 1   | 22 |
| .....GTCAACGGTGTCAAAATTTTCGAA.....   | 2   | 24 |
| .....AACGGTGTCAAAATTTTCGAAACG.....   | 2   | 24 |
| .....ACGGTGTCAAAATTTTCGAAACGG.....   | 6   | 24 |
| .....TGCAAAATTTTCGAAACGGA.....       | 2   | 21 |
| .....TGCAAAATTTTCGAAACGGAGGG.....    | 1   | 24 |
| .....GTCAAAATTTTCGAAACGGAGGG.....    | 1   | 23 |
| .....GTCAAAATTTTCGAAACGGAGGGGA.....  | 3   | 24 |
| .....CAAAATTTTCGAAACGGAGGGAG.....    | 1   | 23 |
| .....AAATTTTCGAAACGGAGGG.....        | 2   | 20 |
| .....AAATTTTCGAAACGGAGGGGA.....      | 1   | 21 |
| .....AAATTTTCGAAACGGAGGGGA.....      | 1   | 20 |
| .....ATATTTTCGAAACGGAGGGAGT.....     | 1   | 21 |
| .....ATTTTCGAAACGGAGGGAGTA.....      | 1   | 20 |
| .....TTTTCGAAACGGAGGGAGT.....        | 2   | 18 |
| .....TTTTCGAAACGGAGGGAGTAT.....      | 1   | 20 |

>osa-miR806g\_MIMAT0004032\_Oryza\_sativa\_miR806g

|                                                                                                                                              |                                 |             |    |
|----------------------------------------------------------------------------------------------------------------------------------------------|---------------------------------|-------------|----|
| ATGTACACATGTAGTTTACATATTTCACTAACTTTTTGAATAAAGCGAACGGTCAAAACATGTGCTAAAAAGTCAACGGTGTCAAAACATTTTGAACGGAGGGAGTACTCTACTATAGTTTATTTTTAATTTACTACTTT | *****ATGTGCTAAAAAGTCAACGGT***** | osa-miR806g | 22 |
| .....ACTAACTTTTTGAATAAAGCGAA.....                                                                                                            | .....                           | 1           | 24 |
| .....AACTTTTTGAATAAAGCGAACGG.....                                                                                                            | .....                           | 11          | 24 |
| .....ACTTTTTGAATAAAGCGAACGGT.....                                                                                                            | .....                           | 10          | 24 |
| .....CTTTTTGAATAAAGCGAACGGT.....                                                                                                             | .....                           | 1           | 23 |
| .....TTTTTGAATAAAGCGAA.....                                                                                                                  | .....                           | 1           | 18 |
| .....TTTTTGAATAAAGCGAACGG.....                                                                                                               | .....                           | 42          | 21 |
| .....TTTTTGAATAAAGCGAACGGT.....                                                                                                              | .....                           | 6           | 22 |
| .....TTTTTGAATAAAGCGAACGGTCA.....                                                                                                            | .....                           | 3           | 23 |
| .....TTTTTGAATAAAGCGAACGG.....                                                                                                               | .....                           | 2           | 19 |
| .....TTTTTGAATAAAGCGAACGG.....                                                                                                               | .....                           | 2           | 20 |
| .....TTTTTGAATAAAGCGAACGGT.....                                                                                                              | .....                           | 83          | 21 |
| .....TTTTTGAATAAAGCGAACGGTC.....                                                                                                             | .....                           | 4           | 22 |
| .....TTTTTGAATAAAGCGAACGGTCA.....                                                                                                            | .....                           | 6           | 23 |
| .....TTTTTGAATAAAGCGAACGGTCAA.....                                                                                                           | .....                           | 13          | 24 |
| .....TTTTTGAATAAAGCGAACGGTCAAA.....                                                                                                          | .....                           | 1           | 25 |
| .....TTTTTGAATAAAGCGAACGG.....                                                                                                               | .....                           | 2           | 19 |
| .....TTTTTGAATAAAGCGAACGGT.....                                                                                                              | .....                           | 13          | 20 |
| .....TTTTTGAATAAAGCGAACGGTCA.....                                                                                                            | .....                           | 2           | 21 |
| .....TTTTTGAATAAAGCGAACGGTCA.....                                                                                                            | .....                           | 5           | 22 |
| .....TTTTTGAATAAAGCGAACGGTCAA.....                                                                                                           | .....                           | 6           | 23 |
| .....TTTTTGAATAAAGCGAACGGTCAAA.....                                                                                                          | .....                           | 8           | 24 |
| .....TTTGAATAAAGCGAACGG.....                                                                                                                 | .....                           | 1           | 18 |
| .....TTTGAATAAAGCGAACGGT.....                                                                                                                | .....                           | 11          | 19 |
| .....TTTGAATAAAGCGAACGGTCA.....                                                                                                              | .....                           | 1           | 20 |
| .....TTTGAATAAAGCGAACGGTCA.....                                                                                                              | .....                           | 9           | 21 |
| .....TTTGAATAAAGCGAACGGTCAA.....                                                                                                             | .....                           | 9           | 22 |
| .....TTTGAATAAAGCGAACGGTCAAA.....                                                                                                            | .....                           | 5           | 23 |
| .....TTTGAATAAAGCGAACGGTCAAA.....                                                                                                            | .....                           | 27          | 24 |

|                            |     |    |
|----------------------------|-----|----|
| TTTGAATAAGACGAACGGTCAAAACA | 2   | 25 |
| TTGAATAAGACGAACGGT         | 2   | 18 |
| TTGAATAAGACGAACGGTCA       | 3   | 20 |
| TTGAATAAGACGAACGGTCAA      | 4   | 21 |
| TTGAATAAGACGAACGGTCAAA     | 2   | 22 |
| TTGAATAAGACGAACGGTCAAAC    | 4   | 23 |
| TTGAATAAGACGAACGGTCAAAACA  | 45  | 24 |
| TGAATAAGACGAACGGTCAA       | 1   | 20 |
| TGAATAAGACGAACGGTCAAA      | 1   | 21 |
| TGAATAAGACGAACGGTCAAAC     | 6   | 22 |
| TGAATAAGACGAACGGTCAAAACA   | 29  | 23 |
| TGAATAAGACGAACGGTCAAAACAT  | 182 | 24 |
| TGAATAAGACGAACGGTCAAAACATG | 1   | 25 |
| GAATAAGACGAACGGTCAAA       | 1   | 20 |
| GAATAAGACGAACGGTCAAAACA    | 46  | 22 |
| GAATAAGACGAACGGTCAAAACAT   | 14  | 23 |
| GAATAAGACGAACGGTCAAAACATG  | 130 | 24 |
| AATAAGACGAACGGTCAAAAC      | 3   | 20 |
| AATAAGACGAACGGTCAAAACA     | 162 | 21 |
| AATAAGACGAACGGTCAAAACAT    | 31  | 22 |
| AATAAGACGAACGGTCAAAACATG   | 26  | 23 |
| AATAAGACGAACGGTCAAAACATGT  | 48  | 24 |
| AATAAGACGAACGGTCAAAACATGTG | 3   | 25 |
| ATAAGACGAACGGTCAAA         | 2   | 18 |
| ATAAGACGAACGGTCAAAC        | 3   | 19 |
| ATAAGACGAACGGTCAAAACA      | 18  | 20 |
| ATAAGACGAACGGTCAAAACAT     | 60  | 21 |
| ATAAGACGAACGGTCAAAACATG    | 83  | 22 |
| ATAAGACGAACGGTCAAAACATGT   | 23  | 23 |
| ATAAGACGAACGGTCAAAACATGTG  | 69  | 24 |
| TAAGACGAACGGTCAAAC         | 1   | 18 |
| TAAGACGAACGGTCAAAACA       | 1   | 19 |
| TAAGACGAACGGTCAAAACAT      | 2   | 20 |
| TAAGACGAACGGTCAAAACATG     | 14  | 21 |
| TAAGACGAACGGTCAAAACATGT    | 2   | 22 |
| TAAGACGAACGGTCAAAACATGTG   | 10  | 23 |
| TAAGACGAACGGTCAAAACATGTGC  | 19  | 24 |
| AAGACGAACGGTCAAAACA        | 1   | 18 |
| AAGACGAACGGTCAAAACAT       | 3   | 19 |
| AAGACGAACGGTCAAAACATG      | 3   | 20 |
| AAGACGAACGGTCAAAACATGT     | 1   | 21 |
| AAGACGAACGGTCAAAACATGTG    | 11  | 22 |
| AAGACGAACGGTCAAAACATGTGC   | 8   | 23 |
| AAGACGAACGGTCAAAACATGTGCT  | 59  | 24 |
| AGACGAACGGTCAAAACATGTG     | 12  | 21 |
| AGACGAACGGTCAAAACATGTGC    | 5   | 22 |
| AGACGAACGGTCAAAACATGTGCT   | 1   | 23 |
| AGACGAACGGTCAAAACATGTGCTA  | 54  | 24 |
| AGACGAACGGTCAAAACATGTGCTAA | 1   | 25 |
| GACGAACGGTCAAAACATGTG      | 2   | 20 |
| GACGAACGGTCAAAACATGTGCTA   | 1   | 23 |
| GACGAACGGTCAAAACATGTGCTAA  | 4   | 24 |
| ACGAACGGTCAAAACATGTGCT     | 5   | 21 |
| ACGAACGGTCAAAACATGTGCTA    | 1   | 22 |
| ACGAACGGTCAAAACATGTGCTAA   | 7   | 23 |
| ACGAACGGTCAAAACATGTGCTAAA  | 11  | 24 |
| CGAACGGTCAAAACATGTGCTA     | 8   | 21 |
| CGAACGGTCAAAACATGTGCTAA    | 1   | 22 |
| CGAACGGTCAAAACATGTGCTAAA   | 1   | 23 |
| CGAACGGTCAAAACATGTGCTAAAA  | 4   | 24 |
| GAACGGTCAAAACATGTGCTA      | 1   | 20 |
| GAACGGTCAAAACATGTGCTAA     | 2   | 21 |
| AACGGTCAAAACATGTGCTAAA     | 3   | 21 |
| AACGGTCAAAACATGTGCTAAAA    | 1   | 22 |
| AACGGTCAAAACATGTGCTAAAAA   | 2   | 23 |
| AACGGTCAAAACATGTGCTAAAAAG  | 4   | 24 |
| ACGGTCAAAACATGTGCTAAAAA    | 3   | 21 |
| ACGGTCAAAACATGTGCTAAAAAGT  | 8   | 24 |
| CGTCAAAACATGTGCTAAAAAGTC   | 1   | 24 |
| GCTCAAAACATGTGCTAAAAAGTCA  | 1   | 24 |
| GCTCAAAACATGTGCTAAAAAGTCA  | 1   | 23 |
| CAAAACATGTGCTAAAAAGTCAACGG | 1   | 25 |
| AAACATGTGCTAAAAAGTCA       | 1   | 19 |
| AAACATGTGCTAAAAAGTCAA      | 1   | 21 |
| AAACATGTGCTAAAAAGTCAACGG   | 110 | 24 |
| AAACATGTGCTAAAAAGTCAACGGT  | 3   | 23 |
| AAACATGTGCTAAAAAGTCAACGGT  | 70  | 24 |
| ACATGTGCTAAAAAGTCAACGGT    | 6   | 23 |
| ACATGTGCTAAAAAGTCAACGGTG   | 15  | 24 |
| CATGTGCTAAAAAGTCAACGGT     | 1   | 21 |
| CATGTGCTAAAAAGTCAACGGTG    | 4   | 23 |
| CATGTGCTAAAAAGTCAACGGTGT   | 4   | 24 |
| ATGTGCTAAAAAGTCAACGGT      | 3   | 21 |
| ATGTGCTAAAAAGTCAACGGTGT    | 2   | 23 |
| ATGTGCTAAAAAGTCAACGGTGTG   | 23  | 24 |
| ATGTGCTAAAAAGTCAACGGTGTCAA | 1   | 26 |
| TGTGCTAAAAAGTCAACGGT       | 1   | 20 |
| TGTGCTAAAAAGTCAACGGTG      | 43  | 21 |
| TGTGCTAAAAAGTCAACGGTGT     | 4   | 22 |
| TGTGCTAAAAAGTCAACGGTG      | 3   | 20 |
| TGTGCTAAAAAGTCAACGGTG      | 4   | 24 |
| TGTGCTAAAAAGTCAACGGTGTCAA  | 3   | 20 |
| TGTGCTAAAAAGTCAACGGTGTG    | 5   | 21 |
| TGTGCTAAAAAGTCAACGGTGTCA   | 1   | 22 |
| TGTGCTAAAAAGTCAACGGTGTCAA  | 2   | 23 |
| TGTGCTAAAAAGTCAACGGTGTCAA  | 1   | 24 |
| GCTAAAAAGTCAACGGTGTCAA     | 1   | 18 |
| GCTAAAAAGTCAACGGTGTCAA     | 1   | 22 |
| GCTAAAAAGTCAACGGTGTCAA     | 1   | 23 |
| GCTAAAAAGTCAACGGTGTCAAAC   | 6   | 24 |
| CTAAAAAGTCAACGGTGTCAA      | 5   | 21 |
| CTAAAAAGTCAACGGTGTCAA      | 2   | 22 |
| TAAAAAGTCAACGGTGTCAA       | 7   | 21 |
| TAAAAAGTCAACGGTGTCAAACAT   | 8   | 24 |
| AAAAAGTCAACGGTGTCAA        | 1   | 20 |
| AAAAAGTCAACGGTGTCAAAC      | 3   | 21 |
| AAAAAGTCAACGGTGTCAAACA     | 5   | 22 |
| AAAAAGTCAACGGTGTCAAACAT    | 7   | 23 |
| AAAAAGTCAACGGTGTCAAACATT   | 120 | 24 |
| AAAAAGTCAACGGTGTCAAAC      | 1   | 20 |
| AAAAAGTCAACGGTGTCAAACA     | 4   | 21 |
| AAAAAGTCAACGGTGTCAAACATT   | 4   | 23 |

|                                       |    |    |
|---------------------------------------|----|----|
| .....AAAAGTCAACGGTGTCAAAACATTT.....   | 22 | 24 |
| .....AAAGTCAACGGTGTCAAAA.....         | 1  | 18 |
| .....AAAGTCAACGGTGTCAAAAC.....        | 2  | 19 |
| .....AAAGTCAACGGTGTCAAAACA.....       | 2  | 20 |
| .....AAAGTCAACGGTGTCAAAACAT.....      | 8  | 21 |
| .....AAAGTCAACGGTGTCAAAACATT.....     | 4  | 22 |
| .....AAAGTCAACGGTGTCAAAACATTT.....    | 14 | 23 |
| .....AAAGTCAACGGTGTCAAAACATTTT.....   | 4  | 24 |
| .....AAGTCAACGGTGTCAAAACAT.....       | 3  | 20 |
| .....AAGTCAACGGTGTCAAAACATT.....      | 8  | 21 |
| .....AAGTCAACGGTGTCAAAACATTT.....     | 1  | 22 |
| .....AAGTCAACGGTGTCAAAACATTTT.....    | 3  | 23 |
| .....AAGTCAACGGTGTCAAAACATTTTG.....   | 1  | 24 |
| .....AGTCAACGGTGTCAAAACATTTTGA.....   | 3  | 24 |
| .....AGTCAACGGTGTCAAAACATTTTGAAA..... | 1  | 26 |
| .....GTCAACGGTGTCAAAACATTTTGAAA.....  | 6  | 24 |
| .....TCAACGGTGTCAAAACATTTTG.....      | 2  | 21 |
| .....CAACGGTGTCAAAACATTTTGAA.....     | 1  | 22 |
| .....AACGGTGTCAAAACATTTTGAA.....      | 2  | 21 |
| .....AACGGTGTCAAAACATTTTGAAA.....     | 1  | 22 |
| .....AACGGTGTCAAAACATTTTGAAACG.....   | 5  | 24 |
| .....ACGGTGTCAAAACATTTTGAAACGG.....   | 5  | 24 |
| .....GGTGTCAAAACATTTTGAAACGGAG.....   | 15 | 24 |
| .....GTGTCAAAACATTTTGAAACGGAGG.....   | 1  | 24 |
| .....TGTCAAAACATTTTGAAACGGGA.....     | 6  | 21 |
| .....TGTCAAAACATTTTGAAACGGAGGG.....   | 2  | 24 |
| .....GTCAAAACATTTTGAAACGGAG.....      | 1  | 21 |
| .....GTCAAAACATTTTGAAACGGAGGG.....    | 1  | 23 |
| .....GTCAAAACATTTTGAAACGGAGGGA.....   | 9  | 24 |
| .....TCAAAACATTTTGAAACGGAGG.....      | 17 | 21 |
| .....TCAAAACATTTTGAAACGGAGGGAG.....   | 1  | 24 |
| .....CAAAACATTTTGAAACGGAGGGA.....     | 1  | 22 |
| .....CAAAACATTTTGAAACGGAGGGAG.....    | 5  | 23 |
| .....CAAAACATTTTGAAACGGAGGGAGT.....   | 4  | 24 |
| .....AAACATTTTGAAACGGAGGG.....        | 2  | 19 |
| .....AAACATTTTGAAACGGAGGGA.....       | 6  | 21 |
| .....AAACATTTTGAAACGGAGGGAGTA.....    | 3  | 24 |
| .....AACATTTTGAAACGGAGGG.....         | 1  | 19 |
| .....AACATTTTGAAACGGAGGGAG.....       | 1  | 21 |
| .....AACATTTTGAAACGGAGGGAGTA.....     | 2  | 23 |
| .....ACATTTTGAAACGGAGGGAGTA.....      | 1  | 22 |
| .....CATTTTGAAACGGAGGGAGTAC.....      | 1  | 22 |
| .....TTTGAACGGAGGGAGT.....            | 1  | 18 |

>osa-miR806h\_MIMAT0004033\_Oryza\_sativa\_miR806h

ATGTAGGCATATAATTTACATATCTCACAAAAGTTTTGAATAAGACGAATGGTCAAAACATGTGCTAAAAAGTCAACGGTGTCAAAACATTTAGAAAACGGAGGGAGTAGTATGTTTATTCGCTTCAGATGGATGCCAGGT

\*\*\*\*\*ATGTGCTAAAAAGTCAACGGTG\*\*\*\*\*

|                                     |     |    |
|-------------------------------------|-----|----|
| ATGTAGGCATATAATTTACATATA.....       | 2   | 21 |
| .....ATTTTACATATCTCACAAAAGTTT.....  | 1   | 24 |
| .....TCACAAAAGTTTTGAATAAGACG.....   | 1   | 24 |
| .....CACAAAAGTTTTGAATAAGACGA.....   | 2   | 24 |
| .....ACAAAAGTTTTGAATAAGACGA.....    | 1   | 23 |
| .....ACAAAAGTTTTGAATAAGACGAA.....   | 4   | 24 |
| .....CAAAAAGTTTTGAATAAGACGA.....    | 1   | 22 |
| .....AAAAGTTTTGAATAAGACGAA.....     | 1   | 22 |
| .....AAAAGTTTTGAATAAGACGAATG.....   | 2   | 24 |
| .....AAAAGTTTTGAATAAGACGAATG.....   | 1   | 23 |
| .....AGTTTTGAATAAGACGAATGGT.....    | 1   | 23 |
| .....AGTTTTGAATAAGACGAATGGTC.....   | 1   | 24 |
| .....TTTTGAATAAGACGAAT.....         | 1   | 18 |
| .....TTTTGAATAAGACGAATG.....        | 2   | 19 |
| .....TTTTGAATAAGACGAATGG.....       | 3   | 20 |
| .....TTTTGAATAAGACGAATGGT.....      | 13  | 21 |
| .....TTTTGAATAAGACGAATGGTCAA.....   | 5   | 24 |
| .....TTTTGAATAAGACGAATGG.....       | 1   | 19 |
| .....TTTTGAATAAGACGAATGGT.....      | 1   | 20 |
| .....TTTTGAATAAGACGAATGGTCAA.....   | 2   | 23 |
| .....TTTTGAATAAGACGAATGGTCAA.....   | 2   | 24 |
| .....TTTGAATAAGACGAATGGTC.....      | 1   | 20 |
| .....TTTGAATAAGACGAATGGTCA.....     | 48  | 21 |
| .....TTTGAATAAGACGAATGGTCAA.....    | 4   | 22 |
| .....TTTGAATAAGACGAATGGTCAA.....    | 1   | 23 |
| .....TTTGAATAAGACGAATGGTCAAAC.....  | 4   | 24 |
| .....TTGAATAAGACGAATGGT.....        | 1   | 18 |
| .....TTGAATAAGACGAATGGTCA.....      | 1   | 20 |
| .....TTGAATAAGACGAATGGTCAA.....     | 10  | 21 |
| .....TTGAATAAGACGAATGGTCAA.....     | 2   | 22 |
| .....TTGAATAAGACGAATGGTCAAACA.....  | 8   | 24 |
| .....TGAATAAGACGAATGGTCAA.....      | 1   | 21 |
| .....TGAATAAGACGAATGGTCAAACA.....   | 9   | 23 |
| .....TGAATAAGACGAATGGTCAAACAT.....  | 35  | 24 |
| .....TGAATAAGACGAATGGTCAAACATG..... | 1   | 25 |
| .....GAATAAGACGAATGGTCAAACATG.....  | 3   | 24 |
| .....AATAAGACGAATGGTCAA.....        | 1   | 19 |
| .....AATAAGACGAATGGTCAAACA.....     | 28  | 21 |
| .....AATAAGACGAATGGTCAAACAT.....    | 2   | 22 |
| .....AATAAGACGAATGGTCAAACATGT.....  | 2   | 24 |
| .....ATAAGACGAATGGTCAA.....         | 1   | 18 |
| .....ATAAGACGAATGGTCAAACA.....      | 13  | 20 |
| .....ATAAGACGAATGGTCAAACAT.....     | 58  | 21 |
| .....ATAAGACGAATGGTCAAACATG.....    | 17  | 22 |
| .....ATAAGACGAATGGTCAAACATGT.....   | 2   | 23 |
| .....ATAAGACGAATGGTCAAACATGTG.....  | 6   | 24 |
| .....TAAGACGAATGGTCAAACA.....       | 1   | 19 |
| .....TAAGACGAATGGTCAAACAT.....      | 3   | 20 |
| .....TAAGACGAATGGTCAAACATG.....     | 2   | 21 |
| .....TAAGACGAATGGTCAAACATGT.....    | 1   | 22 |
| .....TAAGACGAATGGTCAAACATGTG.....   | 1   | 24 |
| .....AGACGAATGGTCAAACATGTG.....     | 4   | 21 |
| .....GACGAATGGTCAAACATGTGCTA.....   | 1   | 23 |
| .....ATGGTCAAACATGTGCTAAAAAGT.....  | 2   | 24 |
| .....GGTCAAACATGTGCTAAAAAGTCA.....  | 1   | 24 |
| .....GTCAAACATGTGCTAAAAAGTCA.....   | 1   | 23 |
| .....CAAACATGTGCTAAAAAGTCAACGG..... | 1   | 25 |
| .....AAACATGTGCTAAAAAGTCA.....      | 1   | 19 |
| .....AAACATGTGCTAAAAAGTCAA.....     | 1   | 21 |
| .....AAACATGTGCTAAAAAGTCAACGG.....  | 110 | 24 |
| .....AACATGTGCTAAAAAGTCAACGG.....   | 3   | 23 |
| .....AACATGTGCTAAAAAGTCAACGGT.....  | 70  | 24 |
| .....ACATGTGCTAAAAAGTCAACGGT.....   | 6   | 23 |
| .....ACATGTGCTAAAAAGTCAACGGTG.....  | 15  | 24 |

osa-miR806h

22

```

.....CATGCTAAAAAGTCAACGG..... 1 21
.....CATGCTAAAAAGTCAACGGT..... 4 23
.....CATGCTAAAAAGTCAACGGTGT..... 4 24
.....ATGCTAAAAAGTCAACGGT..... 3 21
.....ATGCTAAAAAGTCAACGGTGT..... 2 23
.....ATGCTAAAAAGTCAACGGTGT..... 23 24
.....ATGCTAAAAAGTCAACGGTGTCAA..... 1 26
.....TGCTAAAAAGTCAACGGT..... 1 20
.....TGCTAAAAAGTCAACGGTGT..... 43 21
.....TGCTAAAAAGTCAACGGTGT..... 4 22
.....TGCTAAAAAGTCAACGGTGT..... 3 20
.....TGCTAAAAAGTCAACGGTGTCAA..... 4 24
.....TGCTAAAAAGTCAACGGTGT..... 3 20
.....TGCTAAAAAGTCAACGGTGT..... 5 21
.....TGCTAAAAAGTCAACGGTGTCA..... 1 22
.....TGCTAAAAAGTCAACGGTGTCAA..... 2 23
.....TGCTAAAAAGTCAACGGTGTCAA..... 1 24
.....GCTAAAAAGTCAACGGTGT..... 1 18
.....GCTAAAAAGTCAACGGTGTCAA..... 1 22
.....GCTAAAAAGTCAACGGTGTCAA..... 1 23
.....GCTAAAAAGTCAACGGTGTCAAC..... 6 24
.....CTAAAAAGTCAACGGTGTCAA..... 5 21
.....CTAAAAAGTCAACGGTGTCAA..... 2 22
.....TAAAAAGTCAACGGTGTCAA..... 7 21
.....TAAAAAGTCAACGGTGTCAACAT..... 8 24
.....AAAAAGTCAACGGTGTCAA..... 1 20
.....AAAAAGTCAACGGTGTCAAC..... 3 21
.....AAAAAGTCAACGGTGTCAACA..... 5 22
.....AAAAAGTCAACGGTGTCAACAT..... 7 23
.....AAAAAGTCAACGGTGTCAACATT..... 120 24
.....AAAAAGTCAACGGTGTCAAC..... 1 20
.....AAAAAGTCAACGGTGTCAACA..... 4 21
.....AAAAAGTCAACGGTGTCAACAT..... 4 23
.....AAAAAGTCAACGGTGTCAACATT..... 22 24
.....AAAAAGTCAACGGTGTCAAC..... 1 18
.....AAAGTCAACGGTGTCAAC..... 2 19
.....AAAGTCAACGGTGTCAACA..... 2 20
.....AAAGTCAACGGTGTCAACAT..... 8 21
.....AAAGTCAACGGTGTCAACATT..... 4 22
.....AAAGTCAACGGTGTCAACATTT..... 14 23
.....AAAGTCAACGGTGTCAACATTTA..... 2 24
.....AAGTCAACGGTGTCAACAT..... 3 20
.....AAGTCAACGGTGTCAACATT..... 8 21
.....AAGTCAACGGTGTCAACATTT..... 1 22
.....AGTCAACGGTGTCAACATTTA..... 1 24
.....GTCAACGGTGTCAACATTTA..... 1 21
.....GTCAACGGTGTCAACATTTA..... 1 23
.....TCAACGGTGTCAACATTTAG..... 1 21
.....ACGGTGTCAACATTTAGAAACGG..... 6 24
.....GGTGTCAACATTTAGAAACGG..... 1 22
.....GGTGTCAACATTTAGAAACGGA..... 6 23
.....GGTGTCAACATTTAGAAACGGAG..... 20 24
.....GTGTCAACATTTAGAAACGGAG..... 4 24
.....TGTCACATTTAGAAACGGA..... 3 21
.....TGTCACATTTAGAAACGGAGG..... 2 24
.....GTCAACATTTAGAAACGGAGGA..... 2 24
.....CAACATTTAGAAACGGAGGAGT..... 1 24
.....AAACATTTAGAAACGGAGGA..... 1 21
.....AAACATTTAGAAACGGAGGAGT..... 1 23
.....ATTAGAAACGGAGGAG..... 1 18

```

```

>osa-miR807c_MIMAT0004035_Oryza_sativa_miR807c
TTACAAGCCATCGCACAAATCAATAGGATGACAGTCTCATATAGGTGGAACCAACCGTCTCTCACAGGTGAATCATTGATAGTGGTTTTGTCAAATTAACACTCAAAAATATATGACTTGAGTGCCA
*****CTCACTCAACAGGTGAATC*****
.....ACAAAATCAATAGGATGCCAGTC..... 1 24
.....ATCATAGGTGGAACCAACCGTCT..... 1 23
.....TCATAGGTGGAACCAACCGTCTAT..... 1 24
.....TGGAAACCAACCGTCTCTCAC..... 1 22
.....AATCATTGATAGTGGTT..... 1 24

```

```

>osa-miR808_MIMAT0004036_Oryza_sativa_miR808
ATTCATATTGATGTTAATGAATCTAGATAGATATATATGCTAGATTCTTAACATCAATGAATGTTGGAAATGAAGAAGTACTTACATTTGAAATGGAGGAGTACAAAGTATTCTGTATTACTGAGGTGACGAG
*****ATGAATGTTGGAAATGAAGAA*****
.....ATATTGATGTTAATGAATCTA..... 4 21
.....ATATTGATGTTAATGAATCTAGA..... 7 23
.....ATTGATGTTAATGAATCTAGATA..... 1 23
.....TGATGTTAATGAATCTAGATAGAT..... 1 24
.....ATGTTAATGAATCTAGATAGATAT..... 2 24
.....ATATATATGCTAGATTCATT..... 2 21
.....ATATATATGCTAGATTCATTAA..... 2 23
.....ATATATATGCTAGATTCATTAAAC..... 6 24
.....ATATATATGCTAGATTCATTAAACA..... 1 25
.....ATATATGCTAGATTCATTAA..... 1 21
.....ATATATGCTAGATTCATTAAAC..... 1 22
.....ATATATGCTAGATTCATTAAACAT..... 2 24
.....ATATGCTAGATTCATTAAACATC..... 2 23
.....ATATGCTAGATTCATTAAACATCA..... 5 24
.....TATGCTAGATTCATTAAACA..... 1 20
.....TATGCTAGATTCATTAAACATCA..... 2 23
.....TATGCTAGATTCATTAAACATCAA..... 2 24
.....TAGATTCATTAAACATCAATGAA..... 1 24
.....AGATTCATTAAACATCAATGAAT..... 7 24
.....ATTCATTAAACATCAATGAA..... 2 21
.....CATTAAACATCAATGAATGTTGG..... 2 24
.....ATTAACATCAATGAATGTTGGGA..... 1 24
.....AACATCAATGAATGTTGGGA..... 5 21
.....AACATCAATGAATGTTGGGAAT..... 1 24
.....ACATCAATGAATGTTGGGA..... 1 20
.....ACATCAATGAATGTTGGGA..... 9 21
.....CATCAATGAATGTTGGGA..... 3 20
.....CATCAATGAATGTTGGGAAT..... 1 21
.....CATCAATGAATGTTGGGAAT..... 1 22
.....ATCAATGAATGTTGGGA..... 3 19
.....ATCAATGAATGTTGGGA..... 6 20
.....ATCAATGAATGTTGGGAAT..... 11 21
.....ATCAATGAATGTTGGGAATG..... 92 22
.....TCAATGAATGTTGGGA..... 1 18
.....TCAATGAATGTTGGGAAT..... 2 20
.....TCAATGAATGTTGGGAATG..... 2 21
.....AATGAATGTTGGGAATG..... 2 19

```



```

.....ATATGAATGTGGAAATGT..... 1 19
.....AGAACTGACTTACATTGTGAA... 3 20
.....AATGACTTACATTGTGAAA..... 1 19

```

```

>osa-miR809a_MIMAT0004037_Oryza_sativa_miR809a
CATATTGAGGTTAATGAATCTATATAGATATATATGTCTAGATTCAATTAACATCAATGAATGTGAGAAATGTTAGAACTGACTTACATTGTGAAATGGAGGAGTAACAAAACCTCTGTATCAGGCAAAATCCCACT
*****TGAATGTGAGAAATGTTAGAAAT***** 22
.....ATATATATATGTCTAGATTCAATTA..... 2 24
.....ATATATATGTCTAGATTCAATTA..... 2 21
.....ATATATATGTCTAGATTCAATTA..... 2 23
.....ATATATATGTCTAGATTCAATTAAC..... 6 24
.....ATATATATGTCTAGATTCAATTAACA..... 1 25
.....ATATATGTCTAGATTCAATTA..... 1 21
.....ATATGTCTAGATTCAATTAAC..... 1 22
.....ATATATGTCTAGATTCAATTAACAT..... 2 24
.....ATATGTCTAGATTCAATTAACATC..... 2 23
.....ATATGTCTAGATTCAATTAACATCA..... 5 24
.....TATGTCTAGATTCAATTAACA..... 1 20
.....TATGTCTAGATTCAATTAACATCA..... 2 23
.....TATGTCTAGATTCAATTAACATCAA..... 2 24
.....TAGATTCAATTAACATCAATGAAT..... 1 24
.....AGATTCAATTAACATCAATGAAT..... 7 24
.....ATTCAATTAACATCAATGAAT..... 2 21
.....CATTAAACATCAATGAATGTGAG..... 1 24
.....ATCAATATGAATGTGAGAAAT..... 1 21
.....TCAATATGAATGTGAGAA..... 1 18
.....ATATGAATGTGAGAAATGTTAGAA..... 1 24
.....AATGTGAGAAATGTTAGAAATGACT..... 1 24
.....TGTGAGAAATGTTAGAAATGACTTA..... 1 24
.....TGAGAAATGTTAGAAATGACT..... 1 20
.....TGAGAAATGTTAGAAATGACTTAC..... 1 23
.....GAGAAATGTTAGAAATGACTTACAT..... 1 24
.....AGAAATGTTAGAAATGACTTACA..... 3 22
.....AGAAATGTTAGAAATGACTTACAT..... 1 23
.....AGAAATGTTAGAAATGACTTACATT..... 1 24
.....AATGTGAGAAATGACTTACAT..... 3 21
.....AAATGTGAGAAATGACTTACATT..... 1 22
.....AAATGTGAGAAATGACTTACATTG..... 1 23
.....AAATGTGAGAAATGACTTACATTGT..... 1 24
.....AATGTGAGAAATGACTTACATTG..... 1 22
.....ATGTTAGAAATGACTTACATTGTG..... 3 23
.....ATGTTAGAAATGACTTACATTGTGA..... 6 24
.....TTAGAAATGACTTACATTGTGA..... 2 21
.....TTAGAAATGACTTACATTGTGAA..... 1 22
.....TAGAAATGACTTACATTGTGAA..... 25 21
.....TAGAAATGACTTACATTGTGAA..... 3 22
.....AGAAATGACTTACATTGTGAA..... 3 20
.....AATGACTTACATTGTGAA..... 1 19
.....AACAAAACCTCTGTATCAGGCAA..... 1 24
.....AAAACCTCTGTATCAGGCAAAAC..... 1 24

```

```

>osa-miR809b_MIMAT0004038_Oryza_sativa_miR809b
TTCTAGCATTTCCACATTTCATATTGATGTTAATGAATCTAGATTGATTACATCAATGAATGTGAGAAATGTTAGAACTGACTTACATTGTGAAACGGAGGAGTAGTTGCAATATTAAGCCTACATGGGAGTGAATT
*****TGAATGTGAGAAATGTTAGAAAT***** 22
.....CTAGCATTTCCACATTTCATA..... 1 21
.....AGCATTTCCACATTTCATATTGAT..... 3 24
.....GCATTTCCACATTTCATATTGATG..... 1 24
.....ATTTCACATTTCATATTGAT..... 1 21
.....ATATTGATGTTAATGAATCTA..... 4 21
.....ATATTGATGTTAATGAATCTAGA..... 7 23
.....ATCAATATGAATGTGAGAAAT..... 1 21
.....TCAATATGAATGTGAGAA..... 1 18
.....ATATGAATGTGAGAAATGTTAGAA..... 1 24
.....AATGTGAGAAATGTTAGAAATGACT..... 1 24
.....TGTGAGAAATGTTAGAAATGACTTA..... 1 24
.....TGAGAAATGTTAGAAATGACT..... 1 20
.....GAGAAATGTTAGAAATGACTTAC..... 1 23
.....GAGAAATGTTAGAAATGACTTACAT..... 1 24
.....AGAAATGTTAGAAATGACTTACA..... 3 22
.....AGAAATGTTAGAAATGACTTACAT..... 1 23
.....AGAAATGTTAGAAATGACTTACATT..... 1 24
.....AAATGTGAGAAATGACTTACAT..... 3 21
.....AAATGTGAGAAATGACTTACATT..... 1 22
.....AAATGTGAGAAATGACTTACATTG..... 1 23
.....AAATGTGAGAAATGACTTACATTGT..... 1 24
.....AATGTGAGAAATGACTTACATTG..... 1 22
.....ATGTTAGAAATGACTTACATTGTG..... 3 23
.....ATGTTAGAAATGACTTACATTGTGA..... 6 24
.....TTAGAAATGACTTACATTGTGA..... 2 21
.....TTAGAAATGACTTACATTGTGAA..... 1 22
.....TAGAAATGACTTACATTGTGAA..... 25 21
.....TAGAAATGACTTACATTGTGAA..... 3 22
.....TAGAAATGACTTACATTGTGAAAC..... 1 23
.....TAGAAATGACTTACATTGTGAAACG..... 2 24
.....AGAATGACTTACATTGTGAA..... 3 20
.....AGAATGACTTACATTGTGAAAC..... 1 22
.....AGAATGACTTACATTGTGAAACG..... 2 23
.....AGAATGACTTACATTGTGAAACGG..... 142 24
.....AGAATGACTTACATTGTGAAACGGA..... 1 25
.....GAATGACTTACATTGTGAAACGG..... 7 23
.....GAATGACTTACATTGTGAAACGGA..... 59 24
.....AATGACTTACATTGTGAAAC..... 1 19
.....AATGACTTACATTGTGAAACG..... 2 21
.....AATGACTTACATTGTGAAACGG..... 8 22
.....AATGACTTACATTGTGAAACGGA..... 30 23
.....AATGACTTACATTGTGAAACGGAG..... 35 24
.....ATGACTTACATTGTGAAACGG..... 35 21
.....ATGACTTACATTGTGAAACGGA..... 42 22
.....ATGACTTACATTGTGAAACGGAG..... 34 23
.....ATGACTTACATTGTGAAACGGAGG..... 16 24
.....TGACTTACATTGTGAAACGG..... 7 20
.....TGACTTACATTGTGAAACGGA..... 119 21
.....TGACTTACATTGTGAAACGGAG..... 9 22
.....TGACTTACATTGTGAAACGGAGG..... 18 23
.....TGACTTACATTGTGAAACGGAGGG..... 4 24
.....GACTTACATTGTGAAACGG..... 1 19
.....GACTTACATTGTGAAACGGA..... 6 20
.....GACTTACATTGTGAAACGGAG..... 2 21
.....GACTTACATTGTGAAACGGAGG..... 11 23
.....GACTTACATTGTGAAACGGAGGG..... 35 24

```

```

.....ACTTACATTGTGAACGGAG..... 4 20
.....ACTTACATTGTGAACGGAGG..... 18 21
.....ACTTACATTGTGAACGGAGGG..... 11 22
.....ACTTACATTGTGAACGGAGGGAG..... 4 24
.....CTTACATTGTGAACGGAGGGAG..... 1 23
.....CTTACATTGTGAACGGAGGGAGT..... 1 24
.....TTACATTGTGAACGGAGG..... 1 19
.....TTACATTGTGAACGGAGGG..... 3 20
.....TTACATTGTGAACGGAGGGA..... 1 21
.....TTACATTGTGAACGGAGGGAG..... 1 22
.....TTACATTGTGAACGGAGGGAGT..... 1 23
.....TACATTGTGAACGGAGGAG..... 2 21
.....TACATTGTGAACGGAGGAGTA..... 2 23
.....ACATTGTGAACGGAGG..... 1 18
.....ACATTGTGAACGGAGGGAGT..... 3 21
.....TTGTGAACGGAGGGAGT..... 1 18
.....TTGTGAACGGAGGGAGTGT..... 1 22
.....TGTGAACGGAGGGAGTA..... 1 18
.....TGTGAACGGAGGGAGTAG..... 1 19

```

>osa-miR809c\_MIMAT0004039\_Oryza\_sativa\_miR809c

```

ATTCATATTAATTAATGAATCTAGATATATATTTATATAAAATCATTAAACATCAATGAATGTGAGAAATGTTAGAATGACTTACATTGTGAAATGGAGGAAGTATAAGAACTAGGACTGGATGAGAGCTTACTAG
*****TGAATGTGAGAAATGTTAGAAT*****
.....ATTAATGAATCTAGATATATATAT..... 1 24
.....AATGTGAGAAATGTTAGAATGACT..... 1 24
.....TGTGAGAAATGTTAGAATGACTTA..... 1 24
.....TGAGAAATGTTAGAATGACT..... 1 20
.....TGAGAAATGTTAGAATGACTTAC..... 1 23
.....GAGAAATGTTAGAATGACTTACAT..... 1 24
.....AGAAATGTTAGAATGACTTACA..... 3 22
.....AGAAATGTTAGAATGACTTACAT..... 1 23
.....AGAAATGTTAGAATGACTTACATT..... 1 24
.....AAATGTTAGAATGACTTACAT..... 3 21
.....AAATGTTAGAATGACTTACATT..... 1 22
.....AAATGTTAGAATGACTTACATTG..... 1 23
.....AAATGTTAGAATGACTTACATTGT..... 1 24
.....AATGTTAGAATGACTTACATTG..... 1 22
.....ATGTTAGAATGACTTACATTG..... 3 23
.....ATGTTAGAATGACTTACATTGGA..... 6 24
.....TTAGAATGACTTACATTGTGA..... 2 21
.....TTAGAATGACTTACATTGTGAA..... 1 22
.....TAGAATGACTTACATTGTGAA..... 25 21
.....TAGAATGACTTACATTGTGAAA..... 3 22
.....AGAATGACTTACATTGTGAA..... 3 20
.....AATGACTTACATTGTGAAA..... 1 19
.....GACTTACATTGTGAAATGGAGGAA..... 1 24
.....AAGAACTAGGACTGGATGAGAGC..... 2 24
.....AGGACTGGATGAGAGCTTACTAG..... 3 24

```

>osa-miR809d\_MIMAT0004040\_Oryza\_sativa\_miR809d

```

TTTCATATTGATGTTAATGAATCTAGACATAGTTATCTATCTAGATTCATTAAACATCAATGAATGTGAGAAATGTTAGAATGACTTACATTGTGAAACGGAGGAAGTAAAGTAGTTGCTGGATGTTTGTGTTATTC
*****TGAATGTGAGAAATGTTAGAAT*****
.....ATATTGATGTTAATGAATCTA..... 4 21
.....ATATTGATGTTAATGAATCTAGA..... 7 23
.....ATATTGATGTTAATGAATCTAGAC..... 7 24
.....ATATTGATGTTAATGAATCTAGACA..... 1 25
.....ATTGATGTTAATGAATCTAGACA..... 7 23
.....ATTGATGTTAATGAATCTAGACAT..... 7 24
.....TTGATGTTAATGAATCTAGAC..... 1 21
.....TGATGTTAATGAATCTAGACATA..... 2 23
.....ATGTTAATGAATCTAGACAT..... 1 20
.....ATGTTAATGAATCTAGACATA..... 2 21
.....ATGTTAATGAATCTAGACATAG..... 1 22
.....TGTTAATGAATCTAGACATA..... 1 20
.....TCTACTAGATTCATTAAACAT..... 1 21
.....TATCTAGATTCATTAAACATCAAT..... 1 23
.....TAGATTCATTAAACATCAATGAA..... 1 24
.....AGATTCATTAAACATCAATGAA..... 7 24
.....ATTCATTAAACATCAATGAA..... 2 21
.....CATTAAACATCAATGAATGTGAG..... 1 24
.....ATCAATGAATGTGAGAAAT..... 1 21
.....TCAATGAATGTGAGAA..... 1 18
.....ATATGAATGTGAGAAATGTTAGAA..... 1 24
.....AATGTGAGAAATGTTAGAATGACT..... 1 24
.....TGTGAGAAATGTTAGAATGACTTA..... 1 24
.....TGAGAAATGTTAGAATGACT..... 1 20
.....TGAGAAATGTTAGAATGACTTAC..... 1 23
.....GAGAAATGTTAGAATGACTTACAT..... 1 24
.....AGAAATGTTAGAATGACTTACA..... 3 22
.....AGAAATGTTAGAATGACTTACAT..... 1 23
.....AGAAATGTTAGAATGACTTACATT..... 1 24
.....AAATGTTAGAATGACTTACAT..... 3 21
.....AAATGTTAGAATGACTTACATT..... 1 22
.....AAATGTTAGAATGACTTACATTG..... 1 23
.....AAATGTTAGAATGACTTACATTGT..... 1 24
.....AATGTTAGAATGACTTACATTG..... 1 22
.....ATGTTAGAATGACTTACATTG..... 3 23
.....ATGTTAGAATGACTTACATTGGA..... 6 24
.....TTAGAATGACTTACATTGTGA..... 2 21
.....TTAGAATGACTTACATTGTGAA..... 1 22
.....TAGAATGACTTACATTGTGAA..... 25 21
.....TAGAATGACTTACATTGTGAAA..... 3 22
.....TAGAATGACTTACATTGTGAAAC..... 1 23
.....TAGAATGACTTACATTGTGAAACG..... 2 24
.....AGAATGACTTACATTGTGAA..... 3 20
.....AGAATGACTTACATTGTGAAAC..... 1 22
.....AGAATGACTTACATTGTGAAACG..... 2 23
.....AGAATGACTTACATTGTGAAACGG..... 142 24
.....AGAATGACTTACATTGTGAAACGGA..... 1 25
.....GAATGACTTACATTGTGAAACGG..... 7 23
.....GAATGACTTACATTGTGAAACGGA..... 59 24
.....AATGACTTACATTGTGAAA..... 1 19
.....AATGACTTACATTGTGAAACG..... 2 21
.....AATGACTTACATTGTGAAACGG..... 8 22
.....AATGACTTACATTGTGAAACGGA..... 30 23
.....AATGACTTACATTGTGAAACGGAG..... 35 24
.....ATGACTTACATTGTGAAACGG..... 35 21
.....ATGACTTACATTGTGAAACGGA..... 42 22
.....ATGACTTACATTGTGAAACGGAG..... 34 23
.....ATGACTTACATTGTGAAACGGAGG..... 16 24

```

```

.....TGACTTACATTGTGAACGGG..... 7 20
.....TGACTTACATTGTGAACCGGA..... 119 21
.....TGACTTACATTGTGAACCGGAG..... 9 22
.....TGACTTACATTGTGAACCGGAGG..... 18 23
.....TGACTTACATTGTGAACCGGAGGA..... 54 24
.....TGACTTACATTGTGAACCGGAGAA..... 1 25
.....GACTTACATTGTGAACCGG..... 1 19
.....GACTTACATTGTGAACCGGA..... 6 20
.....GACTTACATTGTGAACCGGAG..... 2 21
.....GACTTACATTGTGAACCGGAGGA..... 33 23
.....GACTTACATTGTGAACCGGAGAA..... 91 24
.....ACTTACATTGTGAACCGGAG..... 4 20
.....ACTTACATTGTGAACCGGAGG..... 18 21
.....ACTTACATTGTGAACCGGAGGA..... 8 22
.....ACTTACATTGTGAACCGGAGGA..... 2 23
.....ACTTACATTGTGAACCGGAGGAAG..... 7 24
.....CTTACATTGTGAACCGGAGGA..... 1 21
.....CTTACATTGTGAACCGGAGGA..... 2 22
.....TTACATTGTGAACCGGAGG..... 1 19
.....TTACATTGTGAACCGGAGGA..... 4 20
.....TTACATTGTGAACCGGAGGA..... 12 21
.....TTACATTGTGAACCGGAGGAAG..... 2 22
.....TTACATTGTGAACCGGAGGAAGT..... 3 23
.....TTACATTGTGAACCGGAGGAAGTA..... 1 24
.....TACATTGTGAACCGGAGGA..... 2 19
.....TACATTGTGAACCGGAGGA..... 4 20
.....TACATTGTGAACCGGAGGAAG..... 11 21
.....TACATTGTGAACCGGAGGAAGT..... 1 22
.....TACATTGTGAACCGGAGGAAGTA..... 2 23
.....ACATTGTGAACCGGAGGA..... 1 18
.....ACATTGTGAACCGGAGGA..... 1 19
.....ACATTGTGAACCGGAGGAAG..... 1 20
.....ACATTGTGAACCGGAGGAAGT..... 7 21
.....ACATTGTGAACCGGAGGAAGTA..... 3 22
.....CATTGTGAACCGGAGGAAGT..... 1 20
.....CATTGTGAACCGGAGGAAGTA..... 1 21

```

```

>osa-miR809e_MIMAT0004041_Oryza_sativa_miR809e
TAATGTTAATGAATCTAGACATCTAACATCAATATGCTAGATTATTAACATCAATATGAATGTGAGAAATGTTAGAATGTTACATTGTGAACCGGATGAAGTAGTATTGTTGTTACGTTAAATAAACACAGA
*****TGAATGTGAGAAATGTTAGAAT***** osa-miR809e 22
.AATGTTAATGAATCTAGACA..... 1 20
.AATGTTAATGAATCTAGACAT..... 1 20
.....ATATGCTAGATTATTAACATCA..... 4 24
.....ATCAATATGAATGTGAGAAAT..... 1 21
.....TCAATATGAATGTGAGAA..... 1 18
.....ATATGAATGTGAGAAATGTTAGAA..... 1 24
.....TAGAATAACTTACATTGTGAA..... 1 21
.....AGAATAACTTACATTGTGAACGG..... 23 24
.....GAATAACTTACATTGTGAACCGG..... 2 23
.....GAATAACTTACATTGTGAACCGGA..... 19 24
.....AATAACTTACATTGTGAACCGGA..... 3 23
.....AATAACTTACATTGTGAACCGGAT..... 2 24
.....ATAACTTACATTGTGAACCGGAT..... 1 23
.....AACTTACATTGTGAACCGGAT..... 1 21
.....AACTTACATTGTGAACCGGATGAA..... 1 24
.....CTTACATTGTGAACCGGATGAAGT..... 1 24
.....TTACATTGTGAACCGGATGAA..... 2 21
.....TTACATTGTGAACCGGATGAAG..... 1 22
.....TACATTGTGAACCGGATGAAGT..... 1 22
.....ACATTGTGAACCGGATGAAGTA..... 1 22

```

```

>osa-miR809f_MIMAT0004042_Oryza_sativa_miR809f
TTCAATATGTTAATGAATCTAGACATATATCTATCTAATCTAACATCAATATGAATGTGAGAAATGTTAGAATGTTAAATTTGGAACCGGAGGAATATTAATGTCGTAATCTAATTGAAGAGCCCTC
*****TGAATGTGAGAAATGTTAGAAT***** osa-miR809f 22
...ATATTAATGTTAATGAATCTAGAC..... 2 24
...ATTAATGTTAATGAATCTAGACAT..... 1 24
...TAATGTTAATGAATCTAGACATAT..... 1 24
...AATGTTAATGAATCTAGACA..... 1 20
...AATGTTAATGAATCTAGACATA..... 2 22
...AATGTTAATGAATCTAGACATATA..... 4 24
...ATGTTAATGAATCTAGACAT..... 1 20
...ATGTTAATGAATCTAGACATA..... 2 21
...ATGTTAATGAATCTAGACATAT..... 2 22
...ATGTTAATGAATCTAGACATATA..... 11 23
...ATGTTAATGAATCTAGACATATAT..... 2 24
...TGTTAATGAATCTAGACATA..... 1 20
...ATGAATCTAGACATATATCTATCT..... 1 25
...GAATCTAGACATATATCTATCT..... 1 24
.....ATCAATATGAATGTGAGAAAT..... 1 21
.....TCAATATGAATGTGAGAA..... 1 18
.....ATATGAATGTGAGAAATGTTAGAA..... 1 24
.....TTAAATTTGGAACCGGAGGAAG..... 1 22
.....TTGTGAACCGGAGGAAGTAT..... 2 20
.....TTGTGAACCGGAGGAAGTATT..... 1 21
.....TGAACCGGAGGAAGTATTA..... 1 19

```

```

>osa-miR809g_MIMAT0004043_Oryza_sativa_miR809g
TTCATATTGATGTAATGAATATATAAATATATATGCTAGATTCAATAGCATCAATATGAATGTGAGAAATGTTAGAATGACTTACATTGTGAACCGGAGGATATATAAATAGCTGAGATGCATGCATGATCGCTTG
*****TGAATGTGAGAAATGTTAGAAT***** osa-miR809g 22
.....ATATATGCTAGATTCAAT..... 2 21
.....ATATGCTAGATTCAATAGCA..... 1 23
.....ATATGCTAGATTCAATAGCATC..... 1 23
.....TATGCTAGATTCAATAGCATCAA..... 1 24
.....AGATTCATAGCATCAATATGAAT..... 3 24
.....ATTCATAGCATCAATATGAA..... 1 21
.....ATCAATATGAATGTGAGAAAT..... 1 21
.....TCAATATGAATGTGAGAA..... 1 18
.....ATATGAATGTGAGAAATGTTAGAA..... 1 24
.....AATGTGAGAAATGTTAGAATGACT..... 1 24
.....TGTGAGAAATGTTAGAATGACTTA..... 1 24
.....TGAGAAATGTTAGAATGACT..... 1 20
.....TGAGAAATGTTAGAATGACTTAC..... 1 23
.....GAGAAATGTTAGAATGACTTACAT..... 1 24
.....AGAATGTTAGAATGACTTACA..... 3 22
.....AGAATGTTAGAATGACTTACAT..... 1 23
.....AGAATGTTAGAATGACTTACATT..... 1 24
.....AAATGTTAGAATGACTTACAT..... 3 21
.....AAATGTTAGAATGACTTACATT..... 1 22
.....AAATGTTAGAATGACTTACATTG..... 1 23

```

```

.....AAATGTAGAATGACTTACATTG..... 1 24
.....AATGTAGAATGACTTACATTG..... 1 22
.....ATGTAGAATGACTTACATTGG..... 3 23
.....ATGTAGAATGACTTACATTGTGA..... 6 24
.....TTAGAATGACTTACATTGTGA..... 2 21
.....TTAGAATGACTTACATTGTGAA..... 1 22
.....TAGAATGACTTACATTGTGAA..... 25 21
.....TAGAATGACTTACATTGTGAAA..... 3 22
.....TAGAATGACTTACATTGTGAAAC..... 1 23
.....TAGAATGACTTACATTGTGAAACG..... 2 24
.....AGAATGACTTACATTGTGAA..... 3 20
.....AGAATGACTTACATTGTGAAAC..... 1 22
.....AGAATGACTTACATTGTGAAACG..... 2 23
.....AGAATGACTTACATTGTGAAACGG..... 142 24
.....AGAATGACTTACATTGTGAAACCGA..... 1 25
.....GAATGACTTACATTGTGAAACGG..... 7 23
.....GAATGACTTACATTGTGAAACCGA..... 59 24
.....AATGACTTACATTGTGAAA..... 1 19
.....AATGACTTACATTGTGAAACG..... 2 21
.....AATGACTTACATTGTGAAACGG..... 8 22
.....AATGACTTACATTGTGAAACCGA..... 30 23
.....AATGACTTACATTGTGAAACGGAG..... 35 24
.....ATGACTTACATTGTGAAACGG..... 35 21
.....ATGACTTACATTGTGAAACCGA..... 42 22
.....ATGACTTACATTGTGAAACGGAG..... 34 23
.....ATGACTTACATTGTGAAACGGAGG..... 16 24
.....TGACTTACATTGTGAAACGG..... 7 20
.....TGACTTACATTGTGAAACCGA..... 119 21
.....TGACTTACATTGTGAAACGGAG..... 9 22
.....TGACTTACATTGTGAAACGGAGG..... 18 23
.....TGACTTACATTGTGAAACGGAGGG..... 4 24
.....GACTTACATTGTGAAACGG..... 1 19
.....GACTTACATTGTGAAACCGA..... 6 20
.....GACTTACATTGTGAAACGGAG..... 2 21
.....GACTTACATTGTGAAACGGAGG..... 11 23
.....GACTTACATTGTGAAACGGAGGA..... 35 24
.....ACTTACATTGTGAAACGGAG..... 4 20
.....ACTTACATTGTGAAACGGAGG..... 18 21
.....ACTTACATTGTGAAACGGAGGG..... 11 22
.....ACTTACATTGTGAAACGGAGGGAG..... 4 24
.....CTTACATTGTGAAACGGAGGGAG..... 1 23
.....CTTACATTGTGAAACGGAGGGAGT..... 1 24
.....TTACATTGTGAAACGGAGG..... 1 19
.....TTACATTGTGAAACGGAGGG..... 3 20
.....TTACATTGTGAAACGGAGGGA..... 1 21
.....TTACATTGTGAAACGGAGGAG..... 1 22
.....TTACATTGTGAAACGGAGGAGT..... 1 23
.....TACATTGTGAAACGGAGGAG..... 2 21
.....TACATTGTGAAACGGAGGAGTA..... 2 23
.....ACATTGTGAAACGGAGGG..... 1 18
.....ACATTGTGAAACGGAGGGAGT..... 3 21
.....ATTGTGAAACGGAGGGAGTAT..... 1 21
.....TTGTGAAACGGAGGGAGT..... 1 18
.....TTGTGAAACGGAGGGAGTATA..... 1 21
.....TGTGAAACGGAGGGAGTA..... 1 18
.....TGTGAAACGGAGGGAGTATA..... 1 20

```

```

>osa-miR809h_MIMAT0004044_Oryza_sativa_miR809h
TTCAATTTGATGTTAATGAATCTAGACATATATCTATTTAGATTCAATAAATCAATATGAATGTGAGAAATGTTAGAATAACTTACATTGTGAAACGGAGAAGTCTGTTGAAGTAGTTATCATATATAAAATCAGAA
*****TTGAATGTGAGAAATGTTAGAAT*****
.....ATATTGATGTTAATGAATCTA..... 7 21
.....ATATTGATGTTAATGAATCTAGA..... 7 23
.....ATATTGATGTTAATGAATCTAGAC..... 7 24
.....ATATTGATGTTAATGAATCTAGACA..... 1 25
.....ATTGATGTTAATGAATCTAGACA..... 7 23
.....ATTGATGTTAATGAATCTAGACAT..... 7 24
.....TTGATGTTAATGAATCTAGAC..... 1 21
.....TGATGTTAATGAATCTAGACATA..... 2 23
.....GATGTTAATGAATCTAGACATATAT..... 1 25
.....ATGTTAATGAATCTAGACAT..... 1 20
.....ATGTTAATGAATCTAGACATA..... 2 21
.....ATGTTAATGAATCTAGACATAT..... 2 22
.....ATGTTAATGAATCTAGACATATA..... 11 23
.....ATGTTAATGAATCTAGACATATAT..... 2 24
.....TGTTAATGAATCTAGACATA..... 1 20
.....ACATATATATCTATTTAGATTCA..... 1 23
.....ATATATATCTATTTAGATTCA..... 1 21
.....ATATATATCTATTTAGATTCATTA..... 1 24
.....ATCAATATGAATGTGAGAAAT..... 1 21
.....TCAATATGAATGTGAGAA..... 1 18
.....ATATGAATGTGAGAAATGTTAGAA..... 1 24
.....TAGAATAACTTACATTGTGAA..... 1 21
.....AGAATAACTTACATTGTGAAACGG..... 23 24
.....GAATAACTTACATTGTGAAACGG..... 2 23
.....GAATAACTTACATTGTGAAACCGA..... 19 24
.....AATAACTTACATTGTGAAACGGAG..... 3 23
.....AATAACTTACATTGTGAAACGGAG..... 2 24
.....TAACCTTACATTGTGAAACGGAG..... 1 22
.....AUCTTACATTGTGAAACGGAG..... 1 21
.....ACTTACATTGTGAAACGGAG..... 4 20
.....ACTTACATTGTGAAACGGAGA..... 2 21
.....TTACATTGTGAAACGGAGAA..... 2 20

```

```

>osa-miR811a_MIMAT0004046_Oryza_sativa_miR811a
CCTCACAACTAGGAAAAATGTAGTGCAATACACATATGTAGTGGAACTTAAAACTTACCGTTAGATCGAGAAATGGAGTCCGAGATTGTTACGTCATCATGAGTTAAAAATTAACCTCGCAGATTCACTCATGAGTTG
*****ACCGTTAGATCGAGAAATGGAGCT*****
.....AAAACACCGTTAGATCGAGA..... 1 21
.....AAAACACCGTTAGATCGAGAA..... 1 21
.....AAAACACCGTTAGATCGAGAAA..... 1 22
.....AAAACACCGTTAGATCGAGAAATG..... 1 24
.....AACTACCGTTAGATCGAGAAATGG..... 1 24
.....ACTACCGTTAGATCGAGAAATGGA..... 3 24
.....CTACCGTTAGATCGAGAAATGGA..... 2 23
.....CTACCGTTAGATCGAGAAATGGAC..... 6 24
.....TACCGTTAGATCGAGAAATGGA..... 2 22
.....TACCGTTAGATCGAGAAATGGAC..... 1 23
.....TACCGTTAGATCGAGAAATGGAGG..... 1 24
.....CCGTTAGATCGAGAAATGGAGTCC..... 1 24
.....GTTAGATCGAGAAATGGAGTCC..... 1 23
.....GTTAGATCGAGAAATGGAGTCCG..... 6 24

```

```

.....ATCGAGAAATGGAGCTCCGA..... 1 20
.....ATCGAGAAATGGAGCTCCGAG..... 6 21
.....TCGAGAAATGGAGCTCCGAGA..... 1 21
.....CGAGAAATGGAGCTCCGAGAT..... 1 21
.....GAGAAATGGAGCTCCGAGATTCGT..... 1 24
.....GTTAAAAATTAAGCTCGAGATTCA..... 1 24
.....TTAAAAATTAAGCTCGAGATT..... 1 21
.....TTAAAAATTAAGCTCGAGATT..... 1 22
.....TTAAAAATTAAGCTCGAGATTCA..... 1 24
.....TTAAAAATTAAGCTCGAGATTCACT..... 1 25
.....TAAAAATTAAGCTCGAGATTCA..... 1 23
.....AAAAATTAAGCTCGAGATTCACTCA..... 1 24
.....AAATTAAGCTCGAGATTCACTCAT..... 1 24
.....AAATTAAGCTCGAGATTCACTCATG..... 1 25
.....ATTAAGCTCGAGATTCACTCATG..... 5 24
.....TTTAAGCTCGAGATTCACTCATG..... 1 23
.....TAACTCGAGATTCACTCATG..... 1 22

```

```

>osa-miR811b_MIMAT0004047_Oryza_sativa_miR811b
GGAGATTACAGGAAAAATGTAGTGAAAAACACATATGTAGTGGAAACTGAAAACTACCGTTAGATCGAGAAATGGAGCTCCGAGATTCGCTCACGTACCATGAGTAAAAATTAAGCTCGAGATTCACTCCTGAGTTA
*****ACCGTTAGATCGAGAAATGGAGCT*****
.....AAAACACCGTTAGATCGAGA..... 1 21
.....AAAACACCGTTAGATCGAGAA..... 1 21
.....AAAACACCGTTAGATCGAGAAA..... 1 22
.....AAAACACCGTTAGATCGAGAAATG..... 1 24
.....AACTACCGTTAGATCGAGAAATGG..... 1 24
.....ACTACCGTTAGATCGAGAAATGGA..... 3 24
.....CTACCGTTAGATCGAGAAATGGA..... 2 23
.....CTACCGTTAGATCGAGAAATGGAC..... 6 24
.....TACCGTTAGATCGAGAAATGGA..... 2 22
.....TACCGTTAGATCGAGAAATGGAG..... 1 23
.....TACCGTTAGATCGAGAAATGGAGG..... 1 24
.....CCGTTAGATCGAGAAATGGAGCTC..... 1 24
.....GTAGATCGAGAAATGGAGCTCC..... 1 23
.....GTAGATCGAGAAATGGAGCTCCG..... 6 24
.....ATCGAGAAATGGAGCTCCGA..... 1 20
.....ATCGAGAAATGGAGCTCCGAG..... 6 21
.....TCGAGAAATGGAGCTCCGAGA..... 1 21
.....CGAGAAATGGAGCTCCGAGAT..... 1 21
.....GAGAAATGGAGCTCCGAGATTCGT..... 1 24
.....GAGCTCCGAGATTGCTCCAGCTC..... 1 23
.....ACGCTCCGAGATTGCTCCAGCTC..... 1 22
.....ACGCTCCGAGATTGCTCCAGCTCA..... 1 23
.....GCTCCGAGATTGCTCCAGCTCAC..... 1 23
.....TCGAGATTGCTCCAGCTCA..... 1 20
.....TCGAGATTGCTCCAGCTCAC..... 1 21
.....GAGATTGCTCCAGCTCACATGAG..... 1 24
.....GTTAAAAATTAAGCTCGAGATTCA..... 1 24
.....TTAAAAATTAAGCTCGAGATT..... 1 21
.....TTAAAAATTAAGCTCGAGATT..... 1 22
.....TTAAAAATTAAGCTCGAGATTCA..... 1 24
.....TTAAAAATTAAGCTCGAGATTCACT..... 1 25
.....TAAAAATTAAGCTCGAGATTCA..... 1 23

```

osa-miR811b 24

```

>osa-miR812a_MIMAT0004049_Oryza_sativa_miR812a
ATGAATAGTATTTTATGTGTACTAATTTTTTAAAAATTTTCATAAATTTTCAAAATAGACGGACGGTTAAACGTTGGACACGGATTTTCCAGGCTGCACCTTTATTTGAAACGGAGGTGACGAGACTGTGCATCAACC
*****GACGGACGGTTAAACGTTGGAC*****
.....CATAAATTTTCAAAATAGACGG..... 1 23
.....CATAAATTTTCAAAATAGACGGGA..... 7 24
.....ATAAATTTTCAAAATAGACGG..... 1 21
.....ATAAATTTTCAAAATAGACGGGA..... 3 23
.....ATAAATTTTCAAAATAGACGGAC..... 179 24
.....TAAATTTTCAAAATAGACGGGA..... 1 22
.....TAAATTTTCAAAATAGACGGAC..... 6 23
.....TAAATTTTCAAAATAGACGGACG..... 3 24
.....AAATTTTCAAAATAGACGG..... 1 20
.....AAATTTTCAAAATAGACGGGA..... 1 21
.....AAATTTTCAAAATAGACGGAC..... 3 22
.....AAATTTTCAAAATAGACGGACG..... 13 23
.....AAATTTTCAAAATAGACGGACGG..... 572 24
.....AAATTTTCAAAATAGACGGACGGT..... 1 25
.....AAATTTTCAAAATAGACGGACGG..... 1 22
.....AAATTTTCAAAATAGACGGACGG..... 14 23
.....AAATTTTCAAAATAGACGGACGGT..... 78 24
.....ATTTTCAAAATAGACGGACG..... 2 21
.....ATTTTCAAAATAGACGGACGG..... 7 22
.....ATTTTCAAAATAGACGGACGGT..... 6 23
.....ATTTTCAAAATAGACGGACGGTTA..... 28 24
.....ATTTTCAAAATAGACGGACGGTTA..... 7 25
.....TTTTCAAAATAGACGGAC..... 1 19
.....TTTTCAAAATAGACGGACG..... 4 20
.....TTTTCAAAATAGACGGACGG..... 9 21
.....TTTTCAAAATAGACGGACGGT..... 9 22
.....TTTTCAAAATAGACGGACGGTTA..... 36 23
.....TTTTCAAAATAGACGGACGGTTA..... 15 24
.....TTTTCAAAATAGACGGAC..... 1 18
.....TTTTCAAAATAGACGGACGG..... 2 20
.....TTTTCAAAATAGACGGACGGT..... 34 21
.....TTTTCAAAATAGACGGACGGT..... 5 22
.....TTTTCAAAATAGACGGACGGTTA..... 6 23
.....TTTTCAAAATAGACGGACGGTTAA..... 4 24
.....TTTCAAAATAGACGGACG..... 2 18
.....TTTCAAAATAGACGGACGG..... 3 19
.....TTTCAAAATAGACGGACGGT..... 6 20
.....TTTCAAAATAGACGGACGGTTA..... 3 21
.....TTTCAAAATAGACGGACGGTTA..... 4 22
.....TTTCAAAATAGACGGACGGTTAA..... 1 23
.....TTTCAAAATAGACGGACGGTTAA..... 7 24
.....TTCAAAATAGACGGACGG..... 1 18
.....TTCAAAATAGACGGACGGT..... 4 19
.....TTCAAAATAGACGGACGGTTA..... 2 20
.....TTCAAAATAGACGGACGGTTA..... 1 21
.....TTCAAAATAGACGGACGGTTAA..... 1 23
.....TTCAAAATAGACGGACGGTTAAAC..... 8 24
.....TCAAAATAGACGGACGGTTA..... 1 19
.....TCAAAATAGACGGACGGTTA..... 1 20
.....TCAAAATAGACGGACGGTTAA..... 2 21
.....AAATAAGACGGACGGTTAA..... 3 19
.....AAATAAGACGGACGGTTAAAC..... 7 20
.....AAATAAGACGGACGGTTAAAC..... 10 21

```

osa-miR812a 22

|                                    |    |    |
|------------------------------------|----|----|
| .....AAATAAGACGGACGGTTAAACG.....   | 1  | 22 |
| .....AAATAAGACGGACGGTTAAACGT.....  | 1  | 23 |
| .....AAATAAGACGGACGGTTAAAC.....    | 3  | 20 |
| .....ATAAGACGGACGGTTAAAC.....      | 1  | 18 |
| .....ATAAGACGGACGGTTAAACGTTGG..... | 2  | 24 |
| .....TAAGACGGACGGTTAAACGT.....     | 1  | 20 |
| .....TAAGACGGACGGTTAAACGTTGGA..... | 2  | 24 |
| .....AAGACGGACGGTTAAACGTTGGA.....  | 2  | 23 |
| .....AAGACGGACGGTTAAACGTTGGAC..... | 8  | 24 |
| .....AGACGGACGGTTAAACGTTGGA.....   | 1  | 22 |
| .....ACGGACGGTTAAACGTTGGACGG.....  | 1  | 24 |
| .....GGACGGTTAAACGTTGGACACGGA..... | 5  | 24 |
| .....GACGGTTAAACGTTGGACACG.....    | 1  | 21 |
| .....GACGGTTAAACGTTGGACACGG.....   | 2  | 22 |
| .....GACGGTTAAACGTTGGACACGGA.....  | 6  | 23 |
| .....GACGGTTAAACGTTGGACACGGAT..... | 26 | 24 |
| .....ACGGTTAAACGTTGGACA.....       | 1  | 18 |
| .....ACGGTTAAACGTTGGACACG.....     | 1  | 20 |
| .....ACGGTTAAACGTTGGACACGG.....    | 4  | 21 |
| .....ACGGTTAAACGTTGGACACGGA.....   | 2  | 22 |
| .....ACGGTTAAACGTTGGACACGGAT.....  | 3  | 23 |
| .....ACGGTTAAACGTTGGACACGGATT..... | 4  | 24 |
| .....CGTTAAACGTTGGACACG.....       | 1  | 19 |
| .....CGTTAAACGTTGGACACGGAT.....    | 2  | 22 |
| .....CGTTAAACGTTGGACACGGATT.....   | 1  | 23 |
| .....GTTAAACGTTGGACACGGA.....      | 1  | 20 |
| .....GTTAAACGTTGGACACGGATTTTC..... | 2  | 24 |
| .....TTAAACGTTGGACACGGA.....       | 1  | 18 |
| .....TAAACGTTGGACACGGATT.....      | 1  | 19 |
| .....TAAACGTTGGACACGGATT.....      | 1  | 20 |
| .....TAAACGTTGGACACGGATTTT.....    | 1  | 21 |
| .....TAAACGTTGGACACGGATTTTCAC..... | 2  | 24 |
| .....AAACGTTGGACACGGATTTTCACG..... | 2  | 24 |
| .....AACGTTGGACACGGATTTTCACGG..... | 7  | 24 |
| .....ACGTTGGACACGGATTTTCACGG.....  | 1  | 23 |
| .....ACGTTGGACACGGATTTTCACGGC..... | 1  | 24 |
| .....TGGACACGGATTTTCACGGCT.....    | 1  | 21 |
| .....GACACGGATTTTCACGGCT.....      | 1  | 19 |
| .....ACGATTTTCACGGCTGCACTTAT.....  | 1  | 24 |
| .....CGATTTTCACGGCTGCACTTAT.....   | 1  | 24 |
| .....GGATTTTCACGGCTGCACTTAT.....   | 1  | 23 |
| .....GGATTTTCACGGCTGCACTTATTT..... | 2  | 24 |
| .....TTTCACGGCTGCACTTATTT.....     | 1  | 21 |
| .....CGGCTGCACTTATTTGAACGGGA.....  | 1  | 24 |
| .....GGCTGCACTTATTTGAACGGGAG.....  | 1  | 24 |
| .....CGGAGGTAGACAAGACTGTTCAT.....  | 1  | 24 |

>osa-miR812b\_MIMAT0004050\_Oryza\_sativa\_miR812b  
TATTCTATGTTTATCATCTAATAACAATAAAAACTAATCATTAATAATTTTCAAATAAGACGGACGGTTAAACGTTGGACACGAATACATATAGTCGCACTTATTTGGACGGATGATGATGTTCTATGGGGTCAATT  
\*\*\*\*\*GACGGACGGTTAAACGTTGGAC\*\*\*\*\*

|                                      |     |    |
|--------------------------------------|-----|----|
| .....AATAACAATAAAAACTAATCAT.....     | 2   | 24 |
| .....AAAAATTTTCAAATAAGAC.....        | 1   | 19 |
| .....AAAAATTTTCAAATAAGACGGAC.....    | 2   | 23 |
| .....AAAAATTTTCAAATAAGACGGACG.....   | 229 | 24 |
| .....AAAAATTTTCAAATAAGACGGACGG.....  | 6   | 25 |
| .....AAAAATTTTCAAATAAGACGGACG.....   | 3   | 23 |
| .....AAAAATTTTCAAATAAGACGGACGG.....  | 250 | 24 |
| .....AAAAATTTTCAAATAAGACGGACGGT..... | 2   | 25 |
| .....AAATTTTCAAATAAGACGGA.....       | 1   | 20 |
| .....AAATTTTCAAATAAGACGGAC.....      | 2   | 21 |
| .....AAATTTTCAAATAAGACGGACGG.....    | 2   | 22 |
| .....AAATTTTCAAATAAGACGGACGG.....    | 8   | 23 |
| .....AAATTTTCAAATAAGACGGACGGT.....   | 56  | 24 |
| .....AAATTTTCAAATAAGACGGACGGTT.....  | 2   | 25 |
| .....AAATTTTCAAATAAGACGGA.....       | 1   | 19 |
| .....AATTTTCAAATAAGACGGAC.....       | 1   | 20 |
| .....AATTTTCAAATAAGACGGACGG.....     | 4   | 22 |
| .....AATTTTCAAATAAGACGGACGGT.....    | 12  | 23 |
| .....AATTTTCAAATAAGACGGACGGTTA.....  | 10  | 24 |
| .....AATTTTCAAATAAGACGGACGGTTA.....  | 2   | 25 |
| .....ATTTTCAAATAAGACGGACGG.....      | 3   | 21 |
| .....ATTTTCAAATAAGACGGACGGT.....     | 1   | 22 |
| .....ATTTTCAAATAAGACGGACGGTT.....    | 7   | 23 |
| .....ATTTTCAAATAAGACGGACGGTTA.....   | 23  | 24 |
| .....TTTTCAAATAAGACGGAC.....         | 1   | 18 |
| .....TTTTCAAATAAGACGGACGG.....       | 2   | 20 |
| .....TTTTCAAATAAGACGGACGGT.....      | 34  | 21 |
| .....TTTTCAAATAAGACGGACGGTT.....     | 5   | 22 |
| .....TTTTCAAATAAGACGGACGGTTA.....    | 6   | 23 |
| .....TTTTCAAATAAGACGGACGGTTAA.....   | 4   | 24 |
| .....TTTCAAATAAGACGGACGG.....        | 2   | 18 |
| .....TTTCAAATAAGACGGACGG.....        | 3   | 19 |
| .....TTTCAAATAAGACGGACGGT.....       | 6   | 20 |
| .....TTTCAAATAAGACGGACGGTT.....      | 3   | 21 |
| .....TTTCAAATAAGACGGACGGTTA.....     | 4   | 22 |
| .....TTTCAAATAAGACGGACGGTTAA.....    | 1   | 23 |
| .....TTCAAATAAGACGGACGGTTAA.....     | 7   | 24 |
| .....TTCAAATAAGACGGACGG.....         | 1   | 18 |
| .....TTCAAATAAGACGGACGGT.....        | 4   | 19 |
| .....TTCAAATAAGACGGACGGTT.....       | 2   | 20 |
| .....TTCAAATAAGACGGACGGTTA.....      | 1   | 21 |
| .....TTCAAATAAGACGGACGGTTAA.....     | 1   | 23 |
| .....TTCAAATAAGACGGACGGTTAAAC.....   | 8   | 24 |
| .....TCAAATAAGACGGACGGTT.....        | 1   | 19 |
| .....TCAAATAAGACGGACGGTTA.....       | 1   | 20 |
| .....TCAAATAAGACGGACGGTTAA.....      | 2   | 21 |
| .....AAATAAGACGGACGGTTAA.....        | 3   | 19 |
| .....AAATAAGACGGACGGTTAAAC.....      | 7   | 20 |
| .....AAATAAGACGGACGGTTAAAC.....      | 10  | 21 |
| .....AAATAAGACGGACGGTTAAACG.....     | 1   | 22 |
| .....AAATAAGACGGACGGTTAAACGT.....    | 1   | 23 |
| .....AATAAGACGGACGGTTAAAC.....       | 3   | 20 |
| .....ATAAGACGGACGGTTAAAC.....        | 1   | 18 |
| .....ATAAGACGGACGGTTAAACGTTGG.....   | 2   | 24 |
| .....TAAGACGGACGGTTAAACGT.....       | 1   | 20 |
| .....TAAGACGGACGGTTAAACGTTGGA.....   | 2   | 24 |
| .....AAGACGGACGGTTAAACGTTGGA.....    | 2   | 23 |
| .....AAGACGGACGGTTAAACGTTGGAC.....   | 8   | 24 |
| .....AGACGGACGGTTAAACGTTGGA.....     | 1   | 22 |
| .....ACGGACGGTTAAACGTTGGACACG.....   | 1   | 24 |
| .....GACGGTTAAACGTTGGACACG.....      | 1   | 21 |

osa-miR812b 22

```

.....GACGGTTAAACGTTGGACACGA..... 2 22
.....GACGGTTAAACGTTGGACACGAA..... 5 23
.....GACGGTTAAACGTTGGACACGAAT..... 8 24
.....GACGGTTAAACGTTGGACACGAATA..... 1 25
.....ACGGTTAAACGTTGGACA..... 1 18
.....ACGGTTAAACGTTGGACACG..... 1 20
.....ACGGTTAAACGTTGGACACGA..... 1 21
.....ACGGTTAAACGTTGGACACGAATA..... 4 24
.....CGTTAAACGTTGGACACG..... 1 19
.....GGTTAAACGTTGGACACGA..... 1 19
.....AACGTTGGACACGAATACATATAG..... 4 24
.....ACGTTGGACACGAATACATATAGC..... 4 24
.....GTTGGACACGAATACATATAGCTG..... 1 24
.....TGGACACGAATACATATAGCTGCA..... 2 24
.....ATAGTCGACTTATTTGGGA..... 1 21
.....ATAGTCGACTTATTTGGGACGG..... 3 24
.....AGCTGCACTTATTTGGGAC..... 1 20
.....AGCTGCACTTATTTGGGACGG..... 1 22
.....AGCTGCACTTATTTGGGACGGA..... 3 23
.....AGCTGCACTTATTTGGGACGGAT..... 2 24
.....GCTGCACTTATTTGGGACGG..... 1 21
.....GCTGCACTTATTTGGGACGGA..... 1 22
.....CTGCACTTATTTGGGACGG..... 1 20
.....CTGCACTTATTTGGGACGGA..... 4 21
.....CTGCACTTATTTGGGACGGATG..... 1 24
.....TGCACTTATTTGGGACGGATGTA..... 1 24
.....GCACCTTATTTGGGACGGA..... 2 19
.....GCACCTTATTTGGGACGGATGAG..... 1 24
.....ACTTATTTGGGACGGATGAGTA..... 1 24

```

```

>osa-miR812c_MIMAT0004051_Oryza_sativa_miR812c
TATTTCTGTTTTATCATTTAAACAATAATAAACCAATCATAAAAAAATTTATAAGACGGACGGTTAAACGTTGGACACGAAACCAAGAATGAGTCTTTTGGGATGGATGGAGATTTGGTAGCAATTAATGA
*****GACGGACGGTTAAACGTTGGAC*****osa-miR812c 22
.....AAAAAAATATATAAGACGGAC..... 4 24
.....AAAAAAATATATAAGACGGACG..... 2 25
.....AAAAAAATATATAAGACGGAC..... 3 23
.....AAAAAAATATATAAGACGGAC..... 1 22
.....ATATAAGACGGACGGTAA..... 1 18
.....ATAAGACGGACGGTTAAA..... 2 20
.....ATAAGACGGACGGTTAAA..... 1 18
.....ATAAGACGGACGGTTAAACGTTGG..... 2 24
.....TAAGACGGACGGTTAAACGTTGG..... 1 20
.....TAAGACGGACGGTTAAACGTTGG..... 2 24
.....AAGACGGACGGTTAAACGTTGG..... 2 23
.....AAGACGGACGGTTAAACGTTGGAC..... 8 24
.....AGACGGACGGTTAAACGTTGG..... 1 22
.....ACGGACGGTTAAACGTTGGACACG..... 1 24
.....GGACGGTTAAACGTTGGACACGGA..... 5 24
.....GACGGTTAAACGTTGGACACG..... 1 21
.....GACGGTTAAACGTTGGACACGG..... 2 22
.....GACGGTTAAACGTTGGACACGGA..... 6 23
.....GACGGTTAAACGTTGGACACGAAA..... 35 24
.....GACGGTTAAACGTTGGACACGAAA..... 1 25
.....ACGGTTAAACGTTGGACA..... 1 18
.....ACGGTTAAACGTTGGACACG..... 1 20
.....ACGGTTAAACGTTGGACACGG..... 4 21
.....ACGGTTAAACGTTGGACACGGA..... 2 22
.....ACGGTTAAACGTTGGACACGAAA..... 3 23
.....ACGGTTAAACGTTGGACACGAAA..... 13 24
.....CGGTTAAACGTTGGACACG..... 1 19
.....CGGTTAAACGTTGGACACGAAA..... 3 24
.....GGTTAAACGTTGGACACGGA..... 1 20
.....GGTTAAACGTTGGACACGAA..... 1 21
.....TTAAACGTTGGACACGGA..... 1 18
.....TTAAACGTTGGACACGAAAAC..... 1 22
.....TAAACGTTGGACACGAAAAC..... 1 20
.....AAACGTTGGACACGAAA..... 1 18
.....AAACGTTGGACACGAAAAC..... 1 19
.....AAACGTTGGACACGAAAACCAAG..... 3 24
.....TTGGACACGAAAACCAAGAA..... 1 21

```

```

>osa-miR812d_MIMAT0004052_Oryza_sativa_miR812d
ATATTTCTGTTTTATCATATAAGAACAAATAAAATACTAATCATAAAAAAGTAAATAAGACGGACGGTTAAACGTTGGACACGAAACCCACTGCCGACTTAAATGGGACTGAGGAGTAGAATATTGGATTTTCGAC
*****GACGGACGGTTAAACGTTGGAC*****osa-miR812d 22
.....ATAAAAAAGTAAATAAGACGGAC..... 1 24
.....AAATAAGACGGACGGTTAA..... 3 19
.....AAATAAGACGGACGGTTAAA..... 7 20
.....AAATAAGACGGACGGTTAAAC..... 10 21
.....AAATAAGACGGACGGTTAAACG..... 1 22
.....AAATAAGACGGACGGTTAAACGT..... 1 23
.....AAATAAGACGGACGGTTAAAC..... 3 20
.....ATAAGACGGACGGTTAAA..... 1 18
.....ATAAGACGGACGGTTAAACGTTGG..... 2 24
.....TAAGACGGACGGTTAAACGTTGG..... 1 20
.....TAAGACGGACGGTTAAACGTTGG..... 2 24
.....AAGACGGACGGTTAAACGTTGG..... 2 23
.....AAGACGGACGGTTAAACGTTGGAC..... 8 24
.....AGACGGACGGTTAAACGTTGG..... 1 22
.....ACGGACGGTTAAACGTTGG..... 1 24
.....GACGGTTAAACGTTGGACACG..... 1 21
.....GACGGTTAAACGTTGGACACGA..... 2 22
.....GACGGTTAAACGTTGGACACGAA..... 5 23
.....GACGGTTAAACGTTGGACACGAAA..... 9 24
.....GACGGTTAAACGTTGGACACGAAA..... 1 25
.....ACGGTTAAACGTTGGACA..... 1 18
.....ACGGTTAAACGTTGGACACG..... 1 20
.....ACGGTTAAACGTTGGACACGA..... 1 21
.....ACGGTTAAACGTTGGACACGAAA..... 1 23
.....ACGGTTAAACGTTGGACACGAAA..... 3 24
.....CGGTTAAACGTTGGACACG..... 1 19
.....GGTTAAACGTTGGACACGA..... 1 19
.....GGTTAAACGTTGGACACGAAAAC..... 1 24
.....AAACGTTGGACACGAAA..... 1 18
.....AAACGTTGGACACGAAAAC..... 2 19
.....CGCACTTAAATGGGACTGAGGGA..... 1 24

```

```

>osa-miR812e_MIMAT0004053_Oryza_sativa_miR812e
ATAAATTAATCTGATCGTGACTTAATTTTAAAAAAATTTTAAAAATTTTAAATAAGACGGACGGTTAAACGTTGGACACGAAACCTTAACTGCACATGAAATGGGACGGAGGAGTACTAGATAAATCTTTGGCC
*****GACGGACGGTTAAACGTTGGAC*****osa-miR812e 22

```

```

.....AAAATTTTAAATAAGACGGACG..... 1 23
.....AAAATTTTAAATAAGACGGACGG..... 8 24
.....AAAATTTTAAATAAGACGGACGG..... 1 23
.....AAAATTTTAAATAAGACGGACGGT..... 3 24
.....AATTTTAAATAAGACGGACG..... 1 21
.....ATTTTAAATAAGACGGACGGTTA..... 1 24
.....TTTTAAATAAGACGGACG..... 1 19
.....TTTTAAATAAGACGGACGG..... 2 20
.....TTTTAAATAAGACGGACGGT..... 14 21
.....TTTTAAATAAGACGGACGGTT..... 6 22
.....TTTTAAATAAGACGGACGGTTA..... 2 23
.....TTTTAAATAAGACGGACGGTTAA..... 2 24
.....TTTTAAATAAGACGGACGG..... 2 19
.....TTTTAAATAAGACGGACGGT..... 3 20
.....TTTTAAATAAGACGGACGGT..... 2 21
.....TTTTAAATAAGACGGACGGTTA..... 2 22
.....TTTTAAATAAGACGGACGGTTAA..... 2 23
.....TTTTAAATAAGACGGACGGTTAAA..... 3 24
.....TTTTAAATAAGACGGACGGTT..... 3 20
.....TTTTAAATAAGACGGACGGTTA..... 5 21
.....TTTTAAATAAGACGGACGGTTAAA..... 1 23
.....TTTTAAATAAGACGGACGGTTAAAC..... 1 24
.....TTTTAAATAAGACGGACGGTT..... 1 19
.....TTTTAAATAAGACGGACGGTTA..... 1 20
.....TTTTAAATAAGACGGACGGTTAAA..... 1 22
.....TTTTAAATAAGACGGACGGTTAAAC..... 1 23
.....AAATAAGACGGACGGTTAA..... 3 19
.....AAATAAGACGGACGGTTAAA..... 7 20
.....AAATAAGACGGACGGTTAAAC..... 10 21
.....AAATAAGACGGACGGTTAAACG..... 1 22
.....AAATAAGACGGACGGTTAAACGT..... 1 23
.....AAATAAGACGGACGGTTAAAC..... 3 20
.....ATAAGACGGACGGTTAAA..... 1 18
.....ATAAGACGGACGGTTAAACGTGG..... 2 24
.....TAAGACGGACGGTTAAACGT..... 1 20
.....TAAGACGGACGGTTAAACGTGGA..... 2 24
.....AAGACGGACGGTTAAACGTGGA..... 2 23
.....AAGACGGACGGTTAAACGTGGAC..... 8 24
.....ACGACGGACGGTTAAACGTGGA..... 1 22
.....ACGACGGTTAAACGTGGACACG..... 1 24
.....GGACGGTTAAACGTGGACACGGA..... 5 24
.....GACGGTTAAACGTGGACACG..... 1 21
.....GACGGTTAAACGTGGACACGG..... 2 22
.....GACGGTTAAACGTGGACACGGA..... 6 23
.....GACGGTTAAACGTGGACACGAAA..... 35 24
.....GACGGTTAAACGTGGACACGAAA..... 1 25
.....ACGGTTAAACGTGGACACG..... 1 18
.....ACGGTTAAACGTGGACACG..... 1 20
.....ACGGTTAAACGTGGACACGG..... 4 21
.....ACGGTTAAACGTGGACACGGA..... 2 22
.....ACGGTTAAACGTGGACACGAAA..... 3 23
.....ACGGTTAAACGTGGACACGAAA..... 13 24
.....CGGTTAAACGTGGACACG..... 1 19
.....CGGTTAAACGTGGACACGAAA..... 3 24
.....GGTTAAACGTGGACACGGA..... 1 20
.....GGTTAAACGTGGACACGGA..... 1 21
.....TTAAACGTGGACACGGA..... 1 18
.....TAAACGTGGACACGGAAC..... 1 20
.....AAACGTGGACACGGA..... 1 18
.....AAACGTGGACACGGAAC..... 1 19

```

```

>osa-miR813_MIMAT0004054_Oryza_sativa_miR813
TCACATAAATAAATCATGGATAATACCTACTTAGATTCGTCCGAAATAGCCATAGGGGTTATGGAATGGGTTTACCACCTAATCTATGTTAATAATCCTAAATAGCAAGATTCTGGAGGGCTATTTAATAGCCCTC
*****GGGTTATGGAATGGGTTTACC*****
.....AATACCTCATTAGATTCGTCTC..... 5 24
.....ATACCTCATTAGATTCGTCTCGCA..... 2 24
.....CTCATTAGATTCGTCTCGCAA..... 2 21
.....CATTAGATTCGTCTCGCAAATAG..... 1 24
.....ATTAGATTCGTCTCGCAAATAGC..... 1 24
.....TTAGATTCGTCTCGCAA..... 1 18
.....TTAGATTCGTCTCGCAAAT..... 3 20
.....TTAGATTCGTCTCGCAAATA..... 4 21
.....TTAGATTCGTCTCGCAAATAGCC..... 1 24
.....TCTCGCAAATAGCCTAGGG..... 1 21
.....GCAAATAGCCTAGGGGTTATGGA..... 1 24
.....AAAATAGCCTAGGGGTTATGGA..... 1 22
.....AATAGCCTAGGGGTTATGGAATGG..... 1 24
.....AGCCTAGGGGTTATGGAATGGGTT..... 2 24
.....AATCCTAAATAGCAAGATTCTGGA..... 2 24
.....CCTAAATAGCAAGATTCTGGAGGG..... 2 24
.....CTAAATAGCAAGATTCTGGAG..... 1 21
.....CTAAATAGCAAGATTCTGGAGGG..... 2 23
.....CTAAATAGCAAGATTCTGGAGGGC..... 26 24
.....CTAAATAGCAAGATTCTGGAGGGCT..... 2 25
.....TAAATAGCAAGATTCTGGA..... 1 19
.....TAAATAGCAAGATTCTGGAGGG..... 1 22
.....TAAATAGCAAGATTCTGGAGGGC..... 2 23
.....AAATAGCAAGATTCTGGAGGG..... 1 21
.....AAATAGCAAGATTCTGGAGGGC..... 4 22
.....AAATAGCAAGATTCTGGAGGGCTA..... 10 24
.....AAATAGCAAGATTCTGGAGGGCTAT..... 2 24
.....ATAGCAAGATTCTGGAGGGC..... 1 20
.....ATAGCAAGATTCTGGAGGGCTATT..... 1 24
.....AGCAAGATTCTGGAGGGCTATTAA..... 1 24
.....AAGATTCTGGAGGGCTATTAA..... 3 22
.....AAGATTCTGGAGGGCTATTAAATA..... 5 24
.....AGATTCTGGAGGGCTATTAAATA..... 1 23
.....AGATTCTGGAGGGCTATTAAATAG..... 34 24
.....GATTCTGGAGGGCTATTAAATAGC..... 1 24

```

```

>osa-miR814a_MIMAT0004055_Oryza_sativa_miR814a
GAGTAGTAAAAAAAATCCTCCCGTCCAATAATATAGTAACTAGTACCGGACGAGACCTTACATAGTACAACGAATCTGGACAGTAAGCTCTCAGATTCTGTACTATGAAGTGCATATCCGGCTCAAGTTGC
*****CACCTTACATAGTACAACGAATCT*****
.....AATATAGTAACTAGTACCGGACG..... 1 24
.....ATAGTAACTAGTACCGGACGAGA..... 1 24
.....TAGTAACTAGTACCGGACGAG..... 1 22
.....AGTAACTAGTACCGGACGAGACA..... 1 24
.....AGTACCGGACGAGACCTTACATAG..... 1 24
.....ACGAGACCTTACATAGTACAACGA..... 1 24
.....TAGTACAACGAATCTGGAC..... 1 19

```



```

.....AGTACAACGAATCTGGAC..... 1 18
.....TCCAGATTCGTTGACTAT..... 1 19
.....TCCAGATTCGTTGACTATGA..... 1 21
.....AGATTCGTTGACTATGAAGTGTCT..... 1 24
.....GATTCGTTGACTATGAAGTGTCA..... 1 24

```

```

>osa-miR814b_MIMAT0004056_Oryza_sativa_miR814b
TTTTCTGAACCTTACTACTCCCTCCGTCATATAGTAATCTAAACCGGACGAGACCTCATAGTACAACGAATCTGGACATGAAGATTCGTTGACTATAAAGTGTCTCGTCTGGTCTAGGTTGCTATATTATA
*****CCTTACATAGTACAACGAATCT*****
.....ACTACTCCCTCCGTCATATA..... 1 21
.....ACGAGACCTTACTACTACACGA..... 1 24
.....TCATAGTACAACGAATCTGGACAT..... 1 24
.....TAGTACAACGAATCTGGAC..... 1 19
.....AGTACAACGAATCTGGAC..... 1 18
.....GTACTATAAAGTGTCTCGTCTGGT..... 4 24
.....ACTATAAAGTGTCTCGTCTGGTCC..... 4 24
.....AAAGTGTCTCGTCTGGTCTAGG..... 1 23

```

```

>osa-miR815a_MIMAT0004058_Oryza_sativa_miR815a
ATTTTATTTAGACTCTTAATTTCTTTTCTAGGATGAACCTTAGGGTGTGTTGAGGGAAGGGGATTGAGGAGATTGGGAGATACGCAAAACGAGGTGAGTCATTAGCTTATGATTAATTGAGTAACTATTTTAA
*****AAGGGGATTGAGGAGATTGGG*****
.....TAGGGTGTGTTGAGGGAAGGG..... 2 23
.....AGGGTGTGTTGAGGGAAGGG..... 2 23
.....AGGGTGTGTTGAGGGAAGGGGA..... 1 24
.....GGGTGTGTTGAGGGAAGGGGA..... 1 23
.....GGGTGTGTTGAGGGAAGGGGAT..... 5 24
.....GGTGTGTTGAGGGAAGGGGAT..... 2 23
.....GGTGTGTTGAGGGAAGGGGATT..... 3 24
.....GTGTGTTGAGGGAAGGGGATT..... 2 23
.....TGTGTTGAGGGAAGGGGATTG..... 3 23
.....TGTGTTGAGGGAAGGGGATTGA..... 3 24
.....GTGTTGAGGGAAGGGGATTGA..... 1 23
.....GTGTTGAGGGAAGGGGATTGAG..... 7 24
.....TGTGAGGGAAGGGGATTGAGG..... 1 24
.....GTTGAGGGAAGGGGATT..... 1 24
.....GTTGAGGGAAGGGGATTGAGG..... 3 23
.....GTTGAGGGAAGGGGATTGAGGA..... 10 24
.....TTGAGGGAAGGGGATTGAG..... 1 21
.....TTGAGGGAAGGGGATTGAGGA..... 2 23
.....TTGAGGGAAGGGGATTGAGGAG..... 3 24
.....TTGAGGGAAGGGGATTGAGGAGA..... 2 24
.....TGAGGGAAGGGGATTGAGGAG..... 1 22
.....TGAGGGAAGGGGATTGAGGAGA..... 3 23
.....TGAGGGAAGGGGATTGAGGAGAT..... 4 24
.....GAGGGAAGGGGATTGAGGAG..... 1 21
.....GAGGGAAGGGGATTGAGGAGAT..... 4 23
.....GAGGGAAGGGGATTGAGGAGATT..... 1 24
.....AGGGAAGGGGATTGAGGAG..... 1 20
.....AGGGAAGGGGATTGAGGAGA..... 1 21
.....AGGGAAGGGGATTGAGGAGAT..... 1 22
.....AGGGAAGGGGATTGAGGAGATT..... 3 23
.....GGGAAGGGGATTGAGGAGATTGG..... 8 24
.....GGGAAGGGGATTGAGGAGTTGGG..... 1 25
.....GGAAGGGGATTGAGGAGA..... 1 19
.....GGAAGGGGATTGAGGAGATTGG..... 13 23
.....GGAAGGGGATTGAGGAGATTGGG..... 13 24
.....AGAAGGGGATTGAGGAGA..... 2 18
.....AGAAGGGGATTGAGGAGAT..... 5 19
.....AGAAGGGGATTGAGGAGATT..... 2 20
.....AGAAGGGGATTGAGGAGATTG..... 2 21
.....AGAAGGGGATTGAGGAGATTGG..... 4 22
.....AGAAGGGGATTGAGGAGATTGGG..... 37 23
.....AGAAGGGGATTGAGGAGATTGGGG..... 1 24
.....AGAAGGGGATTGAGGAGATTGGGGA..... 1 25
.....GAAGGGGATTGAGGAGATTGGG..... 4 22
.....GAAGGGGATTGAGGAGATTGGGG..... 12 23
.....GAAGGGGATTGAGGAGATTGGGGA..... 11 24
.....AAGGGGATTGAGGAGATTGGG..... 1 21
.....AAGGGGATTGAGGAGATTGGGA..... 2 23
.....AAGGGGATTGAGGAGATTGGGAG..... 1 24
.....AGGGGATTGAGGAGATTGG..... 1 19
.....AGGGGATTGAGGAGATTGGG..... 4 20
.....AGGGGATTGAGGAGATTGGGA..... 1 22
.....AGGGGATTGAGGAGATTGGGGA..... 2 23
.....AGGGGATTGAGGAGATTGGGAGA..... 4 24
.....GGGGATTGAGGAGATTGG..... 1 18
.....GGGGATTGAGGAGATTGGG..... 4 19
.....GGGGATTGAGGAGATTGGGG..... 3 20
.....GGGGATTGAGGAGATTGGGGA..... 3 21
.....GGGGATTGAGGAGATTGGGGAG..... 2 22
.....GGGGATTGAGGAGATTGGGGAGA..... 16 23
.....GGGGATTGAGGAGATTGGGGAGAT..... 27 24
.....GGGATTGAGGAGATTGGGGAGA..... 1 22
.....GGGATTGAGGAGATTGGGGAGAT..... 1 23
.....GGGATTGAGGAGATTGGGGAGATA..... 1 24
.....ATTGAGGAGATTGGGGAGA..... 2 19
.....ATTGAGGAGATTGGGGAGATA..... 3 21
.....ATTGAGGAGATTGGGGAGATCCG..... 1 24
.....TGAGGAGATTGGGGAGAT..... 1 18
.....TGAGGAGATTGGGGAGATACGCA..... 4 23
.....TGAGGAGATTGGGGAGATACGCAA..... 11 24
.....GAGGAGATTGGGGAGATACGCA..... 1 22
.....GAGGAGATTGGGGAGATACGCAAA..... 2 24
.....GGAGATTGGGGAGATACGCAAAA..... 1 23
.....GATACGCAAAACGAGGTGAG..... 1 20
.....GATACGCAAAACGAGGTGAGTCAT..... 2 24

```

```

>osa-miR815b_MIMAT0004059_Oryza_sativa_miR815b
GGGTATATCCCAATCTCTCTATTTCTCTCCTCAACACACCTGGGAGTGTGAGGAGGGGATTGAGGAGATTGGGAGATACGTAACGAGGTGAGCCATTAGCTCATGATTAATTGAGTAACTATTTTAA
*****AAGGGGATTGAGGAGATTGGG*****
.....GAGAAGGGGATTGAGGAGA..... 1 19
.....GAGAAGGGGATTGAGGAGATTGG..... 13 23
.....GAGAAGGGGATTGAGGAGATTGGG..... 13 24
.....AGAAGGGGATTGAGGAGA..... 2 18
.....AGAAGGGGATTGAGGAGAT..... 5 19
.....AGAAGGGGATTGAGGAGATT..... 2 20
.....AGAAGGGGATTGAGGAGATTG..... 2 21
.....AGAAGGGGATTGAGGAGATTGG..... 4 22
.....AGAAGGGGATTGAGGAGATTGGG..... 37 23

```

|                                     |     |    |
|-------------------------------------|-----|----|
| .....AGAAGGGATTGAGGAGATTGGGA.....   | 18  | 24 |
| .....GAAGGGATTGAGGAGATTGGG.....     | 4   | 22 |
| .....GAAGGGATTGAGGAGATTGGGA.....    | 56  | 23 |
| .....GAAGGGATTGAGGAGATTGGGAA.....   | 36  | 24 |
| .....AAGGGATTGAGGAGATTGGG.....      | 1   | 21 |
| .....AAGGGATTGAGGAGATTGGGA.....     | 5   | 22 |
| .....AAGGGATTGAGGAGATTGGGAA.....    | 6   | 23 |
| .....AAGGGATTGAGGAGATTGGGAAG.....   | 1   | 24 |
| .....AGGGATTGAGGAGATTGG.....        | 1   | 19 |
| .....AGGGATTGAGGAGATTGGG.....       | 4   | 20 |
| .....AGGGATTGAGGAGATTGGGA.....      | 1   | 22 |
| .....AGGGATTGAGGAGATTGGGAAG.....    | 4   | 23 |
| .....AGGGATTGAGGAGATTGGGAAG.....    | 6   | 24 |
| .....AGGGATTGAGGAGATTGGGAAGT.....   | 1   | 25 |
| .....GGGATTGAGGAGATTGG.....         | 1   | 18 |
| .....GGGATTGAGGAGATTGGG.....        | 4   | 19 |
| .....GGGATTGAGGAGATTGGGA.....       | 7   | 20 |
| .....GGGATTGAGGAGATTGGGAAG.....     | 7   | 21 |
| .....GGGATTGAGGAGATTGGGAAG.....     | 4   | 22 |
| .....GGGATTGAGGAGATTGGGAAG.....     | 161 | 23 |
| .....GGGATTGAGGAGATTGGGAAGT.....    | 100 | 24 |
| .....GGGATTGAGGAGATTGGGAAG.....     | 4   | 20 |
| .....GGGATTGAGGAGATTGGGAAG.....     | 12  | 22 |
| .....GGGATTGAGGAGATTGGGAAGT.....    | 13  | 23 |
| .....GGGATTGAGGAGATTGGGAAGT.....    | 3   | 24 |
| .....GGGATTGAGGAGATTGGGAAGT.....    | 1   | 19 |
| .....GGGATTGAGGAGATTGGGAAG.....     | 1   | 21 |
| .....GGGATTGAGGAGATTGGGAAGT.....    | 6   | 24 |
| .....GGGATTGAGGAGATTGGGAAGTACG..... | 1   | 25 |
| .....GATTGAGGAGATTGGGA.....         | 2   | 18 |
| .....GATTGAGGAGATTGGGAAG.....       | 1   | 20 |
| .....GATTGAGGAGATTGGGAAGT.....      | 5   | 21 |
| .....ATTGAGGAGATTGGGAAG.....        | 1   | 18 |
| .....ATTGAGGAGATTGGGAAG.....        | 12  | 19 |
| .....ATTGAGGAGATTGGGAAGT.....       | 5   | 20 |
| .....ATTGAGGAGATTGGGAAGT.....       | 11  | 21 |
| .....ATTGAGGAGATTGGGAAGTAC.....     | 8   | 22 |
| .....ATTGAGGAGATTGGGAAGTACG.....    | 5   | 23 |
| .....TTGAGGAGATTGGGAAGT.....        | 1   | 19 |
| .....TTGAGGAGATTGGGAAGT.....        | 1   | 20 |
| .....TTGAGGAGATTGGGAAGTAC.....      | 3   | 21 |
| .....TGAGGAGATTGGGAAGTACG.....      | 1   | 21 |
| .....TGAGGAGATTGGGAAGTACGTA.....    | 1   | 26 |
| .....AGGAGATTGGGAAGTACGTA.....      | 1   | 21 |
| .....GGAGATTGGGAAGTACGTA.....       | 1   | 24 |
| .....GAGATTGGGAAGTACGTA.....        | 1   | 24 |
| .....AGATTGGGAAGTACGTA.....         | 1   | 18 |
| .....AGATTGGGAAGTACGTA.....         | 1   | 21 |
| .....AGATTGGGAAGTACGTA.....         | 5   | 23 |
| .....AGATTGGGAAGTACGTA.....         | 11  | 24 |
| .....GATTGGGAAGTACGTA.....          | 1   | 24 |
| .....TTGGGAAGTACGTA.....            | 1   | 21 |
| .....TGGGAAGTACGTA.....             | 1   | 20 |
| .....TGGGAAGTACGTA.....             | 1   | 23 |
| .....TGGGAAGTACGTA.....             | 1   | 24 |
| .....GGGAAGTACGTA.....              | 1   | 20 |
| .....GGGAAGTACGTA.....              | 2   | 23 |
| .....GGGAAGTACGTA.....              | 6   | 24 |
| .....GGAAGTACGTA.....               | 1   | 23 |
| .....GGAAGTACGTA.....               | 5   | 24 |
| .....GAGATACGTA.....                | 1   | 23 |
| .....GAGATACGTA.....                | 8   | 24 |
| .....GAGATACGTA.....                | 1   | 25 |
| .....AGATACGTA.....                 | 1   | 21 |
| .....AGATACGTA.....                 | 5   | 23 |
| .....AGATACGTA.....                 | 18  | 24 |
| .....AGATACGTA.....                 | 2   | 21 |
| .....AGATACGTA.....                 | 1   | 22 |
| .....AGATACGTA.....                 | 7   | 23 |
| .....AGATACGTA.....                 | 46  | 24 |
| .....GATACGTA.....                  | 4   | 23 |
| .....GATACGTA.....                  | 1   | 24 |
| .....ATACGTA.....                   | 1   | 21 |
| .....ATACGTA.....                   | 2   | 22 |
| .....ATACGTA.....                   | 1   | 23 |
| .....ATACGTA.....                   | 2   | 24 |
| .....TACGTA.....                    | 4   | 21 |
| .....TACGTA.....                    | 1   | 23 |
| .....AAACGAGGTGAGCCATTAGCTCA.....   | 1   | 23 |
| .....CGAGGTGAGCCATTAGCTCATGA.....   | 3   | 23 |
| .....CATTAGCTCATGATTAATTGAGTA.....  | 1   | 24 |
| .....ATTAGCTCATGATTAATTGAGTA.....   | 1   | 23 |
| .....ATTAGCTCATGATTAATTGAGTAT.....  | 4   | 24 |

>osa-miR815c\_MIMAT0004060\_Oryza\_sativa\_miR815c  
TCACCTCAGCATTAGCCGGCTTATAGCTATACCTCTCTAAGGGTGTGTTGAGGAGAAGGGGATTGAGGAGATTGGGAAGATACGCAAAACGAGGAGAGCCATTAGCTGCTGATTAAGCAACCTTTCTATAGAAA  
\*\*\*\*\*AAGGGATTGAGGAGATTGGG\*\*\*\*\*

|                                   |    |    |
|-----------------------------------|----|----|
| .....CCACCTCAGCATTAGCCGG.....     | 1  | 20 |
| .....AGCATTAGCCGGCTTATAGCTA.....  | 1  | 24 |
| .....ATTAGCCGGCTTATAGC.....       | 1  | 18 |
| .....TAAGGTGTGTTGAGGAGAAGG.....   | 3  | 23 |
| .....TAAGGTGTGTTGAGGAGAAGG.....   | 1  | 24 |
| .....AAGGTGTGTTGAGGAGAAG.....     | 1  | 21 |
| .....AAGGTGTGTTGAGGAGAAG.....     | 2  | 22 |
| .....AAGGTGTGTTGAGGAGAAGG.....    | 2  | 23 |
| .....AGGTGTGTTGAGGAGAAGG.....     | 2  | 23 |
| .....AGGTGTGTTGAGGAGAAGG.....     | 1  | 24 |
| .....GGTGTGTTGAGGAGAAGG.....      | 1  | 23 |
| .....GGTGTGTTGAGGAGAAGGGAT.....   | 5  | 24 |
| .....GGTGTGTTGAGGAGAAGGGAT.....   | 2  | 23 |
| .....GGTGTGTTGAGGAGAAGGGAT.....   | 3  | 24 |
| .....GTGTGTTGAGGAGAAGGGAT.....    | 2  | 23 |
| .....TGTGTTGAGGAGAAGGGATG.....    | 3  | 23 |
| .....TGTGTTGAGGAGAAGGGATG.....    | 3  | 24 |
| .....GTGTGTTGAGGAGAAGGGATG.....   | 1  | 23 |
| .....GTGTGTTGAGGAGAAGGGATG.....   | 7  | 24 |
| .....TGTGTTGAGGAGAAGGGATGAGG..... | 1  | 24 |
| .....GTTTGAAGGAGAAGGGAT.....      | 1  | 19 |
| .....GTTTGAAGGAGAAGGGATGAGG.....  | 3  | 23 |
| .....GTTTGAAGGAGAAGGGATGAGG.....  | 3  | 24 |
| .....GTTTGAAGGAGAAGGGATGAGG.....  | 10 | 24 |

osa-miR815c 21

|                            |     |    |
|----------------------------|-----|----|
| TTTGAGGAAGGGGATTGAG        | 1   | 21 |
| TTTGAGGAAGGGGATTGAGGA      | 2   | 23 |
| TTTGAGGAAGGGGATTGAGGAG     | 3   | 24 |
| TTTGAGGAAGGGGATTGAGGAGA    | 2   | 24 |
| TGAGGAAGGGGATTGAGGAG       | 1   | 22 |
| TGAGGAAGGGGATTGAGGAGA      | 3   | 23 |
| TGAGGAAGGGGATTGAGGAGAT     | 4   | 24 |
| GAGGAAGGGGATTGAGGAG        | 1   | 21 |
| GAGGAAGGGGATTGAGGAGAT      | 4   | 23 |
| GAGGAAGGGGATTGAGGAGATT     | 1   | 24 |
| AGGAAGGGGATTGAGGAG         | 1   | 20 |
| AGGAAGGGGATTGAGGAGA        | 1   | 21 |
| AGGAAGGGGATTGAGGAGAT       | 1   | 22 |
| AGGAAGGGGATTGAGGAGATT      | 3   | 23 |
| GGGAAGGGGATTGAGGAGATTGG    | 8   | 24 |
| GGGAAGGGGATTGAGGAGATTGGG   | 1   | 25 |
| GGAAGGGGATTGAGGAGA         | 1   | 19 |
| GGAAGGGGATTGAGGAGATTGG     | 13  | 23 |
| GGAAGGGGATTGAGGAGATTGGG    | 13  | 24 |
| AGAAGGGGATTGAGGAGA         | 2   | 18 |
| AGAAGGGGATTGAGGAGAT        | 5   | 19 |
| AGAAGGGGATTGAGGAGATT       | 2   | 20 |
| AGAAGGGGATTGAGGAGATTG      | 2   | 21 |
| AGAAGGGGATTGAGGAGATTGG     | 4   | 22 |
| AGAAGGGGATTGAGGAGATTGGG    | 37  | 23 |
| AGAAGGGGATTGAGGAGATTGGGA   | 18  | 24 |
| GAAGGGGATTGAGGAGATTGGG     | 4   | 22 |
| GAAGGGGATTGAGGAGATTGGGA    | 56  | 23 |
| GAAGGGGATTGAGGAGATTGGGAA   | 36  | 24 |
| AAGGGGATTGAGGAGATTGGG      | 1   | 21 |
| AAGGGGATTGAGGAGATTGGGA     | 5   | 22 |
| AAGGGGATTGAGGAGATTGGGAA    | 6   | 23 |
| AAGGGGATTGAGGAGATTGGGAAG   | 1   | 24 |
| AGGGGATTGAGGAGATTGGG       | 1   | 19 |
| AGGGGATTGAGGAGATTGGG       | 4   | 20 |
| AGGGGATTGAGGAGATTGGGA      | 1   | 22 |
| AGGGGATTGAGGAGATTGGGAAG    | 4   | 23 |
| AGGGGATTGAGGAGATTGGGAAGA   | 6   | 24 |
| AGGGGATTGAGGAGATTGGGAAGAT  | 1   | 25 |
| GGGGATTGAGGAGATTGGG        | 1   | 18 |
| GGGGATTGAGGAGATTGGG        | 4   | 19 |
| GGGGATTGAGGAGATTGGGA       | 7   | 20 |
| GGGGATTGAGGAGATTGGGAA      | 7   | 21 |
| GGGGATTGAGGAGATTGGGAAG     | 4   | 22 |
| GGGGATTGAGGAGATTGGGAAGA    | 161 | 23 |
| GGGGATTGAGGAGATTGGGAAGAT   | 100 | 24 |
| GGGATTGAGGAGATTGGGA        | 4   | 20 |
| GGGATTGAGGAGATTGGGAAGA     | 12  | 22 |
| GGGATTGAGGAGATTGGGAAGAT    | 13  | 23 |
| GGGATTGAGGAGATTGGGAAGATA   | 3   | 24 |
| GGATTGAGGAGATTGGGA         | 1   | 19 |
| GGATTGAGGAGATTGGGAAGA      | 1   | 21 |
| GGATTGAGGAGATTGGGAAGATAC   | 6   | 24 |
| GGATTGAGGAGATTGGGAAGATACG  | 1   | 25 |
| GATTGAGGAGATTGGGA          | 2   | 18 |
| GATTGAGGAGATTGGGAAGA       | 1   | 20 |
| GATTGAGGAGATTGGGAAGAT      | 5   | 21 |
| ATTGAGGAGATTGGGAAG         | 1   | 18 |
| ATTGAGGAGATTGGGAAGA        | 12  | 19 |
| ATTGAGGAGATTGGGAAGAT       | 5   | 20 |
| ATTGAGGAGATTGGGAAGATA      | 11  | 21 |
| ATTGAGGAGATTGGGAAGATAC     | 8   | 22 |
| ATTGAGGAGATTGGGAAGATACG    | 5   | 23 |
| ATTGAGGAGATTGGGAAGATACGC   | 22  | 24 |
| ATTGAGGAGATTGGGAAGATACGCA  | 5   | 25 |
| TTGAGGAGATTGGGAAGAT        | 1   | 19 |
| TTGAGGAGATTGGGAAGATA       | 1   | 20 |
| TTGAGGAGATTGGGAAGATAC      | 3   | 21 |
| TTGAGGAGATTGGGAAGATACGC    | 1   | 23 |
| TTGAGGAGATTGGGAAGATACGCA   | 18  | 24 |
| TGAGGAGATTGGGAAGATACG      | 1   | 21 |
| TGAGGAGATTGGGAAGATACGC     | 6   | 22 |
| TGAGGAGATTGGGAAGATACGCA    | 48  | 23 |
| TGAGGAGATTGGGAAGATACGCAA   | 474 | 24 |
| TGAGGAGATTGGGAAGATACGCAAA  | 2   | 25 |
| GAGGAGATTGGGAAGATACGC      | 8   | 21 |
| GAGGAGATTGGGAAGATACGCA     | 15  | 22 |
| GAGGAGATTGGGAAGATACGCAA    | 41  | 23 |
| GAGGAGATTGGGAAGATACGCAAA   | 32  | 24 |
| AGGAGATTGGGAAGATACGC       | 1   | 20 |
| AGGAGATTGGGAAGATACGCA      | 2   | 21 |
| AGGAGATTGGGAAGATACGCAA     | 2   | 22 |
| AGGAGATTGGGAAGATACGCAAA    | 2   | 23 |
| AGGAGATTGGGAAGATACGCAAAA   | 6   | 24 |
| GGAGATTGGGAAGATACGC        | 1   | 19 |
| GGAGATTGGGAAGATACGCA       | 4   | 20 |
| GGAGATTGGGAAGATACGCAA      | 10  | 21 |
| GGAGATTGGGAAGATACGCAAA     | 1   | 22 |
| GGAGATTGGGAAGATACGCAAAA    | 15  | 23 |
| GGAGATTGGGAAGATACGCAAAAC   | 16  | 24 |
| GAGATTGGGAAGATACGC         | 1   | 18 |
| GAGATTGGGAAGATACGCA        | 4   | 19 |
| GAGATTGGGAAGATACGCAA       | 8   | 20 |
| GAGATTGGGAAGATACGCAAA      | 2   | 21 |
| GAGATTGGGAAGATACGCAAAA     | 3   | 23 |
| GAGATTGGGAAGATACGCAAAAACG  | 6   | 24 |
| AGATTGGGAAGATACGCA         | 3   | 18 |
| AGATTGGGAAGATACGCAA        | 6   | 19 |
| AGATTGGGAAGATACGCAAAA      | 2   | 22 |
| AGATTGGGAAGATACGCAAAAACG   | 3   | 22 |
| AGATTGGGAAGATACGCAAAAACG   | 10  | 23 |
| AGATTGGGAAGATACGCAAAAACG   | 35  | 24 |
| AGATTGGGAAGATACGCAAAAACGAG | 1   | 25 |
| GATTGGGAAGATACGCAAA        | 1   | 19 |
| GATTGGGAAGATACGCAAAA       | 1   | 20 |
| GATTGGGAAGATACGCAAAAACG    | 1   | 22 |
| GATTGGGAAGATACGCAAAAACG    | 3   | 23 |
| GATTGGGAAGATACGCAAAAACGAG  | 1   | 24 |
| GATACGCAAAAACGAGAGAGCCA    | 1   | 23 |
| ACGCAAAAACGAGAGAGCCATTAG   | 1   | 24 |



```

.....AAAATCCCTATATATGGGACGG..... 3 24
.....AAATCCCTATATATGGGACGGA..... 11 24
.....AATCCCTATATATGGGACGGA..... 1 23
.....AATCCCTATATATGGGACGGAG..... 1 24
.....ATCCCTATATATGGGACGGAGG..... 4 24
.....TCCTTATATATGGGACGGAGG..... 1 23
.....CCCTTATATATGGGACGGAG..... 1 21
.....CCCTTATATATGGGACGGAGG..... 1 22
.....CCCTTATATATGGGACGGAGGA..... 4 23
.....CCCTTATATATGGGACGGAGGAA..... 11 24
.....CCTTATATATGGGACGGAGG..... 3 21
.....CCTTATATATGGGACGGAGAA..... 4 23
.....CTTATATATGGGACGGAGGA..... 2 21
.....TTATATATGGGACGGAGGAA..... 1 21
.....TATATATGGGACGGAGGA..... 1 19
.....ATATATGGGACGGAGGAA..... 1 19
.....TATTATGGGACGGAGGAAATAAC..... 1 23
.....TATGGGACGGAGGAAATAACAATT..... 1 24
.....AATTAAGGATTGTCACTGCTGT..... 1 24

```

```

>osa-miR819a_MIMAT0004068_Oryza_sativa_miR819a
TTTCAGTAAACAGTAAATGCCAACAGGCTTTCCACATTAGACAATTACTACCTCCGTTTCAGGTTATAAGACTTTCTAGCATGCCACATCATATAGATGTTAATGAATCTAGACATAACATCTATATGAATGTGG
*****TACGTTATAAGACTTTCTAGC*****
.....TACCTCCGTTTCAGGTTATAAGACT..... 1 24
.....TCCGTTTCAGGTTATAAGACT..... 2 21
.....GTTTCAGGTTATAAGACTTTCTAGC..... 1 25
.....TCAGGTTATAAGACTTTCTAGCAT..... 25 24
.....CAGGTTATAAGACTTTCT..... 1 18
.....CAGGTTATAAGACTTTCTAGCA..... 2 22
.....CAGGTTATAAGACTTTCTAGCAT..... 3 23
.....CAGGTTATAAGACTTTCTAGCATT..... 14 24
.....AGGTTATAAGACTTTCTAGCA..... 6 21
.....AGGTTATAAGACTTTCTAGCAT..... 1 22
.....AGGTTATAAGACTTTCTAGCATT..... 2 23
.....AGGTTATAAGACTTTCTAGCATTG..... 1 24
.....GTTATAAGACTTTCTAGCATTGCC..... 6 24
.....TTATAAGACTTTCTAGCAT..... 1 19
.....TTATAAGACTTTCTAGCATT..... 1 20
.....TTATAAGACTTTCTAGCATTG..... 7 21
.....TTATAAGACTTTCTAGCATTG..... 1 22
.....TTATAAGACTTTCTAGCATTGCC..... 2 24
.....TATAAGACTTTCTAGCATT..... 1 19
.....TATAAGACTTTCTAGCATTG..... 1 20
.....ATAAGACTTTCTAGCATT..... 2 18
.....ATAAGACTTTCTAGCATTGCC..... 4 21
.....ATAAGACTTTCTAGCATTGCC..... 7 22
.....ATAAGACTTTCTAGCATTGCCCA..... 9 23
.....ATAAGACTTTCTAGCATTGCCACA..... 85 24
.....TAAGACTTTCTAGCATTGCC..... 18 21
.....TAAGACTTTCTAGCATTGCCCA..... 1 22
.....TAAGACTTTCTAGCATTGCCACA..... 1 23
.....TAAGACTTTCTAGCATTGCCACA..... 11 24
.....AGACTTTCTAGCATTGCC..... 2 20
.....AGACTTTCTAGCATTGCCCA..... 2 21
.....AGACTTTCTAGCATTGCCACA..... 1 22
.....AGACTTTCTAGCATTGCCACA..... 4 23
.....AGACTTTCTAGCATTGCCACAT..... 3 24
.....AGACTTTCTAGCATTGCCACA..... 10 21
.....AGACTTTCTAGCATTGCCACA..... 2 22
.....ACTTTCTAGCATTGCCACA..... 1 19
.....ACTTTCTAGCATTGCCACAT..... 1 21
.....CTAGCATTGCCACATTCAT..... 1 20
.....TAGCATTGCCACATCATATA..... 1 22
.....TTGCCACATTCATATAGTG..... 1 21
.....TTGCCACATTCATATAGTGTT..... 1 23
.....TTTATATAGATGTTAATGAAT..... 2 21
.....ATATAGATGTTAATGAATCTAG..... 1 22
.....ATATAGATGTTAATGAATCTAGGC..... 13 24
.....TATAGATGTTAATGAATCTA..... 1 20
.....ATAGATGTTAATGAATCTAGGC..... 1 22
.....AGATGTTAATGAATCTAGGCA..... 1 21
.....AGATGTTAATGAATCTAGGCATA..... 1 23
.....ATGTTAATGAATCTAGGCATAT..... 1 22

```

```

>osa-miR819b_MIMAT0004069_Oryza_sativa_miR819b
TGAGAGCTAACATCCTTAATTTTTTACACCTCTCCACAGTAAAGCTACTACCTCCGTTTCAGGTTATAAGACTTTCTAGCATTACCCACATCATATAGATGTTAATGAATCTAGACATAACATATGTCTAGATTCAAT
*****TACGTTATAAGACTTTCTAGC*****
.....TACCTCCGTTTCAGGTTATAAGACT..... 1 24
.....TCCGTTTCAGGTTATAAGACT..... 2 21
.....GTTTCAGGTTATAAGACTTTCTAGC..... 1 25
.....TCAGGTTATAAGACTTTCTAGCAT..... 25 24
.....CAGGTTATAAGACTTTCT..... 1 18
.....CAGGTTATAAGACTTTCTAGCA..... 2 22
.....CAGGTTATAAGACTTTCTAGCAT..... 3 23
.....CAGGTTATAAGACTTTCTAGCATT..... 14 24
.....AGGTTATAAGACTTTCTAGCA..... 6 21
.....AGGTTATAAGACTTTCTAGCAT..... 1 22
.....AGGTTATAAGACTTTCTAGCATT..... 2 23
.....TTATAAGACTTTCTAGCAT..... 1 19
.....TTATAAGACTTTCTAGCATT..... 1 20
.....TTATAAGACTTTCTAGCATT..... 2 21
.....TTATAAGACTTTCTAGCATTACCC..... 2 24
.....TATAAGACTTTCTAGCATT..... 1 19
.....ATAAGACTTTCTAGCATT..... 2 18
.....ATAAGACTTTCTAGCATT..... 1 19
.....ATAAGACTTTCTAGCATTACCC..... 3 22
.....ATAAGACTTTCTAGCATTACCCA..... 4 23
.....ATAAGACTTTCTAGCATTACCCAC..... 46 24
.....TAAGACTTTCTAGCATTACCC..... 1 21
.....AGACTTTCTAGCATTACCCA..... 1 21
.....AGACTTTCTAGCATTACCCACA..... 2 23
.....AGACTTTCTAGCATTACCCACAT..... 8 24
.....AGACTTTCTAGCATTACCCACAT..... 1 23
.....AGACTTTCTAGCATTACCCACATT..... 2 24
.....CTTTCTAGCATTACCCACATTCAT..... 1 24
.....AGCATTACCCACATTCATATAGAT..... 1 24
.....ATATAGATGTTAATGAATCTAGA..... 1 23
.....ATATTAATGAATCTAGACATACAT..... 2 24
.....ATTAATGAATCTAGACATACATA..... 1 25

```

>osa-miR819c\_MIMAT0004070\_Oryza\_sativa\_miR819c

|                                                                                                                                           |             |    |
|-------------------------------------------------------------------------------------------------------------------------------------------|-------------|----|
| GAGCAAAGGTATCATGATACCCATTAACTTAGTAACTTAAACACTTACTACCTCCGTTTCAGGTTATAAGACTTTCTAGCATTGCCACATTCATATAGATGTTAATGAATCTAGCCACACATATGTCTAGATTCAAT | osa-miR819c | 22 |
| .....TACCTCCGTTTCAGGTTATAAGACTTTCTAGC.....                                                                                                | 1           | 24 |
| .....TCCGTTTCAGGTTATAAGACT.....                                                                                                           | 2           | 21 |
| .....GTTTCAGGTTATAAGACTTTCTAGC.....                                                                                                       | 1           | 25 |
| .....TCAGGTTATAAGACTTTCTAGCAT.....                                                                                                        | 25          | 24 |
| .....CAGGTTATAAGACTTTCT.....                                                                                                              | 1           | 18 |
| .....CAGGTTATAAGACTTTCTAGCA.....                                                                                                          | 2           | 22 |
| .....CAGGTTATAAGACTTTCTAGCAT.....                                                                                                         | 3           | 23 |
| .....CAGGTTATAAGACTTTCTAGCATT.....                                                                                                        | 14          | 24 |
| .....AGGTTATAAGACTTTCTAGCA.....                                                                                                           | 6           | 21 |
| .....AGGTTATAAGACTTTCTAGCAT.....                                                                                                          | 1           | 22 |
| .....AGGTTATAAGACTTTCTAGCATT.....                                                                                                         | 2           | 23 |
| .....AGGTTATAAGACTTTCTAGCATTG.....                                                                                                        | 1           | 24 |
| .....GTTATAAGACTTTCTAGCATTGCC.....                                                                                                        | 6           | 24 |
| .....TTATAAGACTTTCTAGCAT.....                                                                                                             | 1           | 19 |
| .....TTATAAGACTTTCTAGCATT.....                                                                                                            | 1           | 20 |
| .....TTATAAGACTTTCTAGCATTG.....                                                                                                           | 7           | 21 |
| .....TTATAAGACTTTCTAGCATTGC.....                                                                                                          | 1           | 22 |
| .....TTATAAGACTTTCTAGCATTGCC.....                                                                                                         | 2           | 24 |
| .....TATAAGACTTTCTAGCATT.....                                                                                                             | 1           | 19 |
| .....TATAAGACTTTCTAGCATTG.....                                                                                                            | 1           | 20 |
| .....ATAAGACTTTCTAGCATT.....                                                                                                              | 2           | 18 |
| .....ATAAGACTTTCTAGCATTGCC.....                                                                                                           | 4           | 21 |
| .....ATAAGACTTTCTAGCATTGCC.....                                                                                                           | 7           | 22 |
| .....ATAAGACTTTCTAGCATTGCCA.....                                                                                                          | 9           | 23 |
| .....ATAAGACTTTCTAGCATTGCCAC.....                                                                                                         | 85          | 24 |
| .....TAAGACTTTCTAGCATTGCC.....                                                                                                            | 18          | 21 |
| .....TAAGACTTTCTAGCATTGCCA.....                                                                                                           | 1           | 22 |
| .....TAAGACTTTCTAGCATTGCCAC.....                                                                                                          | 1           | 23 |
| .....TAAGACTTTCTAGCATTGCCACAC.....                                                                                                        | 11          | 24 |
| .....AAGACTTTCTAGCATTGCC.....                                                                                                             | 2           | 20 |
| .....AAGACTTTCTAGCATTGCCA.....                                                                                                            | 2           | 21 |
| .....AAGACTTTCTAGCATTGCCAC.....                                                                                                           | 1           | 22 |
| .....AAGACTTTCTAGCATTGCCACAC.....                                                                                                         | 4           | 23 |
| .....AGACTTTCTAGCATTGCCACAT.....                                                                                                          | 3           | 24 |
| .....AGACTTTCTAGCATTGCCAC.....                                                                                                            | 10          | 21 |
| .....AGACTTTCTAGCATTGCCACAC.....                                                                                                          | 2           | 22 |
| .....ACTTTCTAGCATTGCCAC.....                                                                                                              | 1           | 19 |
| .....ACTTTCTAGCATTGCCACAT.....                                                                                                            | 1           | 21 |
| .....CTAGCATTGCCACATCAT.....                                                                                                              | 1           | 20 |
| .....TAGCATTGCCACATCATATA.....                                                                                                            | 1           | 22 |
| .....TTGCCACATCATATAGATG.....                                                                                                             | 1           | 21 |
| .....TTGCCACATCATATAGATGT.....                                                                                                            | 1           | 23 |
| .....TTCATATAGATGTTAATGAAT.....                                                                                                           | 2           | 21 |
| .....ATATAGATGTTAATGAATCTAG.....                                                                                                          | 1           | 22 |
| .....ATATAGATGTTAATGAATCTAGGC.....                                                                                                        | 13          | 24 |
| .....TATAGATGTTAATGAATCTA.....                                                                                                            | 1           | 20 |
| .....ATAGATGTTAATGAATCTAGGC.....                                                                                                          | 1           | 22 |
| .....AGATGTTAATGAATCTAGGCA.....                                                                                                           | 1           | 21 |
| .....AGATGTTAATGAATCTAGGCACAC.....                                                                                                        | 3           | 24 |
| .....GATGTTAATGAATCTAGGCACAC.....                                                                                                         | 2           | 24 |
| .....ATGTTAATGAATCTAGGCACAC.....                                                                                                          | 2           | 21 |
| .....ATGTTAATGAATCTAGGCACAC.....                                                                                                          | 1           | 23 |
| .....ATGTTAATGAATCTAGGCACACAT.....                                                                                                        | 2           | 24 |
| .....GTTAATGAATCTAGGCACACATAT.....                                                                                                        | 3           | 24 |
| .....GTTAATGAATCTAGGCACACATATA.....                                                                                                       | 1           | 25 |
| .....TTAATGAATCTAGGCACACAC.....                                                                                                           | 4           | 20 |
| .....TTAATGAATCTAGGCACACAT.....                                                                                                           | 3           | 21 |
| .....TTAATGAATCTAGGCACACATATA.....                                                                                                        | 1           | 24 |
| .....TAATGAATCTAGGCACACAC.....                                                                                                            | 1           | 19 |
| .....TAATGAATCTAGGCACACATATAT.....                                                                                                        | 2           | 24 |
| .....AATGAATCTAGGCACACATAT.....                                                                                                           | 1           | 21 |
| .....AATGAATCTAGGCACACATATAT.....                                                                                                         | 1           | 23 |
| .....AATGAATCTAGGCACACATATATGT.....                                                                                                       | 33          | 24 |
| .....ATGAATCTAGGCACACATATGT.....                                                                                                          | 1           | 25 |
| .....ATGAATCTAGGCACACATATGT.....                                                                                                          | 6           | 23 |
| .....ATGAATCTAGGCACACATATGT.....                                                                                                          | 10          | 24 |
| .....ATGAATCTAGGCACACATATATGT.....                                                                                                        | 1           | 25 |
| .....TGAATCTAGGCACACATATATGT.....                                                                                                         | 1           | 23 |
| .....GGCACACATATATGTCTAGATTCA.....                                                                                                        | 1           | 24 |
| .....GCACACATATATGTCTAGATTCA.....                                                                                                         | 1           | 24 |

>osa-miR819d\_MIMAT0004071\_Oryza\_sativa\_miR819d

|                                                                                                                                          |             |    |
|------------------------------------------------------------------------------------------------------------------------------------------|-------------|----|
| AGGCTAACTTCTATAACTTTGACTATCAATAAATTTAAAATATCTACTACCTCCGTTTCAGGTTATAAGACTTTCTAGCATTGCCACATTCATATAGATGTTAATGAATCTAGCAAGTGTCTAGATTCAATCAACA | osa-miR819d | 22 |
| .....TACCTCCGTTTCAGGTTATAAGACTTTCTAGC.....                                                                                               | 1           | 24 |
| .....TCCGTTTCAGGTTATAAGACT.....                                                                                                          | 2           | 21 |
| .....GTTTCAGGTTATAAGACTTTCTAGC.....                                                                                                      | 1           | 25 |
| .....TCAGGTTATAAGACTTTCTAGCAT.....                                                                                                       | 25          | 24 |
| .....CAGGTTATAAGACTTTCT.....                                                                                                             | 1           | 18 |
| .....CAGGTTATAAGACTTTCTAGCA.....                                                                                                         | 2           | 22 |
| .....CAGGTTATAAGACTTTCTAGCAT.....                                                                                                        | 3           | 23 |
| .....CAGGTTATAAGACTTTCTAGCATT.....                                                                                                       | 14          | 24 |
| .....AGGTTATAAGACTTTCTAGCA.....                                                                                                          | 6           | 21 |
| .....AGGTTATAAGACTTTCTAGCAT.....                                                                                                         | 1           | 22 |
| .....AGGTTATAAGACTTTCTAGCATT.....                                                                                                        | 2           | 23 |
| .....AGGTTATAAGACTTTCTAGCATTG.....                                                                                                       | 1           | 24 |
| .....GTTATAAGACTTTCTAGCATTGCC.....                                                                                                       | 6           | 24 |
| .....TTATAAGACTTTCTAGCAT.....                                                                                                            | 1           | 19 |
| .....TTATAAGACTTTCTAGCATT.....                                                                                                           | 1           | 20 |
| .....TTATAAGACTTTCTAGCATTG.....                                                                                                          | 7           | 21 |
| .....TTATAAGACTTTCTAGCATTGC.....                                                                                                         | 1           | 22 |
| .....TTATAAGACTTTCTAGCATTGCC.....                                                                                                        | 2           | 24 |
| .....TATAAGACTTTCTAGCATT.....                                                                                                            | 1           | 19 |
| .....TATAAGACTTTCTAGCATTG.....                                                                                                           | 1           | 20 |
| .....ATAAGACTTTCTAGCATT.....                                                                                                             | 2           | 18 |
| .....ATAAGACTTTCTAGCATTGCC.....                                                                                                          | 4           | 21 |
| .....ATAAGACTTTCTAGCATTGCC.....                                                                                                          | 7           | 22 |
| .....ATAAGACTTTCTAGCATTGCCA.....                                                                                                         | 9           | 23 |
| .....ATAAGACTTTCTAGCATTGCCAC.....                                                                                                        | 85          | 24 |
| .....TAAGACTTTCTAGCATTGCC.....                                                                                                           | 18          | 21 |
| .....TAAGACTTTCTAGCATTGCCA.....                                                                                                          | 1           | 22 |
| .....TAAGACTTTCTAGCATTGCCAC.....                                                                                                         | 1           | 23 |
| .....TAAGACTTTCTAGCATTGCCACAC.....                                                                                                       | 11          | 24 |
| .....AAGACTTTCTAGCATTGCC.....                                                                                                            | 2           | 20 |
| .....AAGACTTTCTAGCATTGCCA.....                                                                                                           | 2           | 21 |
| .....AAGACTTTCTAGCATTGCCAC.....                                                                                                          | 1           | 22 |
| .....AAGACTTTCTAGCATTGCCACAC.....                                                                                                        | 4           | 23 |

```

.....AAGACTTTCTAGATTGCCACAT..... 3 24
.....AGACTTTCTAGATTGCCAC..... 10 21
.....AGACTTTCTAGATTGCCACA..... 2 22
.....ACTTTCTAGATTGCCAC..... 1 19
.....ACTTTCTAGATTGCCACAT..... 1 21
.....CTAGATTGCCACATTCAT..... 1 20
.....TAGCATTGCCACATTCATATA..... 1 22
.....TTGCCACATTCATATAGATG..... 1 21
.....TTGCCACATTCATATAGATGTT..... 1 23
.....TTCATATAGATGTTAATGAAT..... 2 21
.....ATATAGATGTTAATGAATCTAG..... 1 22
.....ATATAGATGTTAATGAATCTAGA..... 2 23
.....ATATAGATGTTAATGAATCTAGAC..... 5 24
.....TATAGATGTTAATGAATCTA..... 1 20
.....ATAGATGTTAATGAATCTAGACA..... 1 23

```

>osa-miR819e\_MIMAT0004072\_Oryza\_sativa\_miR819e

```

ATTTTTTCAAAATATGTTCAAATCAAATTAAGTGTGTTAATTAAGTACTACCTCCGTTTCAGGTTATAAGACTTTCTAGATTGCCACATTCATATAGATGTTAATGAATCTAGGCACACATATATGCTAGATTCATT
*****TACCTCCGTTTCAGGTTATAAGACTTTCTAGC*****osa-miR819e 22
.....TACCTCCGTTTCAGGTTATAAGACT..... 1 24
.....TCCGTTTCAGGTTATAAGACT..... 2 21
.....GTTTCAGGTTATAAGACTTTCTAGC..... 1 25
.....TCAGGTTATAAGACTTTCTAGCAT..... 25 24
.....CAGGTTATAAGACTTTCT..... 1 18
.....CAGGTTATAAGACTTTCTAGCA..... 2 22
.....CAGGTTATAAGACTTTCTAGCAT..... 3 23
.....CAGGTTATAAGACTTTCTAGCATT..... 14 24
.....AGGTTATAAGACTTTCTAGCA..... 6 21
.....AGGTTATAAGACTTTCTAGCAT..... 1 22
.....AGGTTATAAGACTTTCTAGCATT..... 2 23
.....AGGTTATAAGACTTTCTAGCATTG..... 1 24
.....GTTATAAGACTTTCTAGCATTGCC..... 6 24
.....TTATAAGACTTTCTAGCAT..... 1 19
.....TTATAAGACTTTCTAGCATT..... 1 20
.....TTATAAGACTTTCTAGCATTG..... 7 21
.....TTATAAGACTTTCTAGCATTG..... 1 22
.....TTATAAGACTTTCTAGCATTGCC..... 2 24
.....TATAAGACTTTCTAGCATT..... 1 19
.....TATAAGACTTTCTAGCATTG..... 1 20
.....ATAAGACTTTCTAGCATT..... 2 18
.....ATAAGACTTTCTAGCATTGCC..... 4 21
.....ATAAGACTTTCTAGCATTGCC..... 7 22
.....ATAAGACTTTCTAGCATTGCCCA..... 9 23
.....ATAAGACTTTCTAGCATTGCCAC..... 85 24
.....TAAGACTTTCTAGCATTGCC..... 18 21
.....TAAGACTTTCTAGCATTGCCCA..... 1 22
.....TAAGACTTTCTAGCATTGCCAC..... 1 23
.....TAAGACTTTCTAGCATTGCCACCA..... 11 24
.....AAGACTTTCTAGCATTGCC..... 2 20
.....AAGACTTTCTAGCATTGCCCA..... 2 21
.....AAGACTTTCTAGCATTGCCAC..... 1 22
.....AAGACTTTCTAGCATTGCCACCA..... 4 23
.....AAGACTTTCTAGCATTGCCACAT..... 3 24
.....AGACTTTCTAGCATTGCCAC..... 10 21
.....AGACTTTCTAGCATTGCCACCA..... 2 22
.....ACTTTCTAGCATTGCCACAT..... 1 19
.....ACTTTCTAGCATTGCCACATTCAT..... 1 21
.....CTAGCATTGCCACATTCAT..... 1 20
.....TAGCATTGCCACATTCATATA..... 1 22
.....TTGCCACATTCATATAGATG..... 1 21
.....TTGCCACATTCATATAGATGTT..... 1 23
.....TTGCACATTCATATAGATGTT..... 2 21
.....TTGCACATTCATATAGATGTTAATGAAT..... 2 21
.....ATATAGATGTTAATGAATCTAG..... 1 22
.....ATATAGATGTTAATGAATCTAGGC..... 13 24
.....TATAGATGTTAATGAATCTA..... 1 20
.....ATAGATGTTAATGAATCTAGGC..... 1 22
.....AGATGTTAATGAATCTAGGCA..... 1 21
.....AGATGTTAATGAATCTAGGCACAC..... 3 24
.....GATGTTAATGAATCTAGGCACACA..... 2 24
.....ATGTTAATGAATCTAGGCACACA..... 2 21
.....ATGTTAATGAATCTAGGCACACA..... 1 23
.....ATGTTAATGAATCTAGGCACACAT..... 2 24
.....GTTAATGAATCTAGGCACACATAT..... 3 24
.....GTTAATGAATCTAGGCACACATATA..... 1 25
.....TTAATGAATCTAGGCACACA..... 4 20
.....TTAATGAATCTAGGCACACAT..... 3 21
.....TTAATGAATCTAGGCACACATATA..... 1 24
.....TAATGAATCTAGGCACACA..... 1 19
.....TAATGAATCTAGGCACACATAT..... 2 24
.....AATGAATCTAGGCACACATAT..... 1 21
.....AATGAATCTAGGCACACATATAT..... 1 23
.....AATGAATCTAGGCACACATATATG..... 33 24
.....AATGAATCTAGGCACACATATGT..... 1 25
.....ATGAATCTAGGCACACATATATG..... 6 23
.....ATGAATCTAGGCACACATATATGT..... 10 24
.....ATGAATCTAGGCACACATATGTCT..... 1 25
.....TGAACTAGGCACACATATATGT..... 1 23
.....GGCACACATATATGCTAGATTCAT..... 1 24
.....GCACACATATATGCTAGATTCAT..... 1 24

```

>osa-miR819f\_MIMAT0004073\_Oryza\_sativa\_miR819f

```

TGC CGC TGAGT CAG CGT GGG ACC CTG T GAG C C C C A C A T G C T A C A C C C C C G T T C A G G T T A T A A G A C T T T C T A G C A T T G C C C A C A T C A T A T A T G T T A A T G A A T C T A G G C A C A C A T A T A C T G C T A G A T T C A T T
*****TACCTCCGTTTCAGGTTATAAGACTTTCTAGC*****osa-miR819f 22
TGC CGC TGAGT CAG CGT GGG..... 4 19
TGC CGC TGAGT CAG CGT GGG..... 1 21
TGC CGC TGAGT CAG CGT GGG..... 1 22
.....TCCGTTTCAGGTTATAAGACT..... 2 21
.....GTTTCAGGTTATAAGACTTTCTAGC..... 1 25
.....TCAGGTTATAAGACTTTCTAGCAT..... 25 24
.....CAGGTTATAAGACTTTCT..... 1 18
.....CAGGTTATAAGACTTTCTAGCA..... 2 22
.....CAGGTTATAAGACTTTCTAGCAT..... 3 23
.....CAGGTTATAAGACTTTCTAGCATT..... 14 24
.....AGGTTATAAGACTTTCTAGCA..... 6 21
.....AGGTTATAAGACTTTCTAGCAT..... 1 22
.....AGGTTATAAGACTTTCTAGCATT..... 2 23
.....AGGTTATAAGACTTTCTAGCATTG..... 1 24
.....GTTATAAGACTTTCTAGCATTGCC..... 6 24
.....TTATAAGACTTTCTAGCAT..... 1 19
.....TTATAAGACTTTCTAGCATT..... 1 20

```

```

.....TTATAAGACTTTCTAGCATTG..... 7 21
.....TTATAAGACTTTCTAGCATTGC..... 1 22
.....TTATAAGACTTTCTAGCATTGCC..... 2 24
.....TATAAGACTTTCTAGCATT..... 1 19
.....TATAAGACTTTCTAGCATTG..... 1 20
.....ATAAGACTTTCTAGCATT..... 2 18
.....ATAAGACTTTCTAGCATTGCC..... 4 21
.....ATAAGACTTTCTAGCATTGCC..... 7 22
.....ATAAGACTTTCTAGCATTGCC..... 9 23
.....ATAAGACTTTCTAGCATTGCCCA..... 85 24
.....TAAGACTTTCTAGCATTGCCCA..... 18 21
.....TAAGACTTTCTAGCATTGCCCA..... 1 22
.....TAAGACTTTCTAGCATTGCCCA..... 1 23
.....TAAGACTTTCTAGCATTGCCCA..... 11 24
.....AGACTTTCTAGCATTGCC..... 2 20
.....AGACTTTCTAGCATTGCCCA..... 2 21
.....AGACTTTCTAGCATTGCCCA..... 1 22
.....AGACTTTCTAGCATTGCCCA..... 4 23
.....AGACTTTCTAGCATTGCCCAT..... 3 24
.....AGACTTTCTAGCATTGCCCA..... 10 21
.....AGACTTTCTAGCATTGCCCA..... 2 22
.....ACTTTCTAGCATTGCCCA..... 1 19
.....ACTTTCTAGCATTGCCCA..... 1 21
.....CTAGCATTGCCCACTCAT..... 1 20
.....TAGCATTGCCCACTCATATA..... 1 22
.....ATTGCCCACTCATATATG..... 1 22
.....TTGCCCACTCATATATG..... 1 21
.....ATATATGTTAATGAATCTA..... 3 21
.....ATATATGTTAATGAATCTAGGC..... 2 24
.....TATATGTTAATGAATCTAGGC..... 1 23
.....TATATGTTAATGAATCTAGGCA..... 12 24
.....ATATGTTAATGAATCTAG..... 1 20
.....ATATATGTTAATGAATCTAGGCAC..... 7 24
.....TATGTTAATGAATCTAGGCACA..... 2 22
.....ATGTTAATGAATCTAGGCACA..... 2 21
.....ATGTTAATGAATCTAGGCACATA..... 1 23
.....AATGAATCTAGGCACATACATG..... 1 24

```

```

>osa-miR819g_MIMAT0004074_Oryza_sativa_miR819g
ACTCTGGAGTGGAGATGGGAAACTCGATAATTGAACCTTGCATATATCCATCCGTTTCAGGTTATAAGACTTTCTAGCATTGCCCACTCATAGAGATGTTAATGAATCAAGCACACATATGTCTAGATTCA
*****TCAGGTTATAAGACTTTCTAGC*****
.....TACTCCATCCGTTTCAGGTTATAA..... 1 24
.....TCCGTTTCAGGTTATAAGACT..... 2 21
.....GTTTCAGGTTATAAGACTTTCTAGC..... 1 25
.....TCAGGTTATAAGACTTTCTAGCAT..... 25 24
.....CAGGTTATAAGACTTTCT..... 1 18
.....CAGGTTATAAGACTTTCTAGCA..... 2 22
.....CAGGTTATAAGACTTTCTAGCAT..... 3 23
.....CAGGTTATAAGACTTTCTAGCATT..... 14 24
.....AGGTTATAAGACTTTCTAGCA..... 6 21
.....AGGTTATAAGACTTTCTAGCAT..... 1 22
.....AGGTTATAAGACTTTCTAGCATT..... 2 23
.....AGGTTATAAGACTTTCTAGCATTG..... 1 24
.....GTTATAAGACTTTCTAGCATTGCC..... 6 24
.....TTATAAGACTTTCTAGCAT..... 1 19
.....TTATAAGACTTTCTAGCATT..... 1 20
.....TTATAAGACTTTCTAGCATTG..... 7 21
.....TTATAAGACTTTCTAGCATTGC..... 1 22
.....TTATAAGACTTTCTAGCATTGCC..... 2 24
.....TATAAGACTTTCTAGCATT..... 1 19
.....TATAAGACTTTCTAGCATTG..... 1 20
.....ATAAGACTTTCTAGCATT..... 2 18
.....ATAAGACTTTCTAGCATTGCC..... 4 21
.....ATAAGACTTTCTAGCATTGCC..... 7 22
.....ATAAGACTTTCTAGCATTGCCCA..... 9 23
.....ATAAGACTTTCTAGCATTGCCCA..... 85 24
.....TAAGACTTTCTAGCATTGCCCA..... 18 21
.....TAAGACTTTCTAGCATTGCCCA..... 1 22
.....TAAGACTTTCTAGCATTGCCCA..... 1 23
.....TAAGACTTTCTAGCATTGCCCA..... 11 24
.....AGACTTTCTAGCATTGCC..... 2 20
.....AGACTTTCTAGCATTGCCCA..... 2 21
.....AGACTTTCTAGCATTGCCCA..... 1 22
.....AGACTTTCTAGCATTGCCCA..... 4 23
.....AGACTTTCTAGCATTGCCCACT..... 3 24
.....AGACTTTCTAGCATTGCCCA..... 10 21
.....AGACTTTCTAGCATTGCCCA..... 2 22
.....ACTTTCTAGCATTGCCCA..... 1 19
.....ACTTTCTAGCATTGCCCACT..... 1 21
.....CTAGCATTGCCCACTCAT..... 1 20
.....GCACACATATGTCTAGATTCA..... 1 24

```

```

>osa-miR819h_MIMAT0004075_Oryza_sativa_miR819h
TCGGAGTGTGGTAATCCTCTCTTATCTTACTTGTAAATTAAGACTTTCTAGCATTGCCCACTCATATATGTTAATGAATCAAGCACACATATGTCTAGATTCA
*****TCAGGTTATAAGACTTTCTAGC*****
.....TCCGTTTCAGGTTATAAGACT..... 1 21
.....GTTTCAGGTTATAAGACTTTCTAGC..... 1 25
.....TCAGGTTATAAGACTTTCTAGCAT..... 25 24
.....CAGGTTATAAGACTTTCT..... 1 18
.....CAGGTTATAAGACTTTCTAGCA..... 2 22
.....CAGGTTATAAGACTTTCTAGCAT..... 3 23
.....CAGGTTATAAGACTTTCTAGCATT..... 14 24
.....AGGTTATAAGACTTTCTAGCA..... 6 21
.....AGGTTATAAGACTTTCTAGCAT..... 1 22
.....AGGTTATAAGACTTTCTAGCATT..... 2 23
.....AGGTTATAAGACTTTCTAGCATTG..... 1 24
.....GTTATAAGACTTTCTAGCATTGCC..... 6 24
.....TTATAAGACTTTCTAGCAT..... 1 19
.....TTATAAGACTTTCTAGCATT..... 1 20
.....TTATAAGACTTTCTAGCATTG..... 7 21
.....TTATAAGACTTTCTAGCATTGC..... 1 22
.....TTATAAGACTTTCTAGCATTGCC..... 2 24
.....TATAAGACTTTCTAGCATT..... 1 19
.....TATAAGACTTTCTAGCATTG..... 1 20
.....ATAAGACTTTCTAGCATT..... 2 18
.....ATAAGACTTTCTAGCATTGCC..... 4 21
.....ATAAGACTTTCTAGCATTGCC..... 7 22
.....ATAAGACTTTCTAGCATTGCCCA..... 9 23
.....ATAAGACTTTCTAGCATTGCCCA..... 85 24
.....TAAGACTTTCTAGCATTGCCCA..... 18 21

```



```

.....TAAGACTTTCTAGATTGCCA..... 1 22
.....TAAGACTTTCTAGATTGCCAC..... 1 23
.....TAAGACTTTCTAGATTGCCACA..... 11 24
.....AAGACTTTCTAGATTGCC..... 2 20
.....AAGACTTTCTAGATTGCCA..... 2 21
.....AAGACTTTCTAGATTGCCAC..... 1 22
.....AAGACTTTCTAGATTGCCACA..... 4 23
.....AAGACTTTCTAGATTGCCACAT..... 3 24
.....AAGACTTTCTAGATTGCCAC..... 10 21
.....AGACTTTCTAGATTGCCACA..... 2 22
.....ACTTTCTAGATTGCCAC..... 1 19
.....ACTTTCTAGATTGCCACAT..... 1 21
.....CTAGATTGCCACATTCAT..... 1 20
.....TAGATTGCCACATCATATA..... 1 22
.....ATTGCCACATCATATATAG..... 1 22
.....TTGCCACATCATATATAG..... 1 21
.....GGCACACATATGTCTAGATTCA..... 1 24
.....GCACACATATGTCTAGATTCA..... 1 24

```

>osa-miR819i\_MIMAT0004076\_Oryza\_sativa\_miR819i

```

TCTGATGTGCTCACATTTCCATGTAATAATCATTGCCACTCATTACTACCTCCGTTTCAGGTTATAAGACTTTCTAGACTTGTCTACATTCGTATAGATTAATGAATCTAGACACATATATGTTTAGATTCA
*****TACGTTATAAGACTTTCTAGC*****
.....TACTCCGTTTCAGGTTATAAGAC..... 1 24
.....TCCGTTTCAGGTTATAAGACT..... 2 21
.....GTTTCAGGTTATAAGACTTTCTAGC..... 1 25
.....TCAGGTTATAAGACTTTCTAGCAT..... 25 24
.....CAGGTTATAAGACTTTCT..... 1 18
.....CAGGTTATAAGACTTTCTAGCA..... 2 22
.....CAGGTTATAAGACTTTCTAGCAT..... 3 23
.....CAGGTTATAAGACTTTCTAGCATT..... 14 24
.....AGGTTATAAGACTTTCTAGCA..... 6 21
.....AGGTTATAAGACTTTCTAGCAT..... 1 22
.....AGGTTATAAGACTTTCTAGCATT..... 2 23
.....AGGTTATAAGACTTTCTAGACTG..... 1 24
.....TTATAAGACTTTCTAGCATT..... 1 19
.....TTATAAGACTTTCTAGCATT..... 1 20
.....TTATAAGACTTTCTAGCTG..... 7 21
.....TATAAGACTTTCTAGCATT..... 1 19
.....TATAAGACTTTCTAGCATTG..... 1 20
.....ATAAGACTTTCTAGCATT..... 2 18
.....ATAAGACTTTCTAGCATTGCT..... 1 21
.....TAAGACTTTCTAGCATTGT..... 1 19
.....AGATTAATGAATCTAGACACAT..... 1 24
.....ATATTAATGAATCTAGACACA..... 1 21
.....ATATTAATGAATCTAGACACATAT..... 2 24
.....TTAATGAATCTAGACACAT..... 1 19
.....TTAATGAATCTAGACACATATAT..... 2 23

```

>osa-miR819j\_MIMAT0004077\_Oryza\_sativa\_miR819j

```

ACATATATCATTGATGTTGAACACATATGTAATAGTTAACTTTTACTACCTCCGTTTCAGGTTATAAGACTTTCTAGACTTGCCTACATCATATAGATGTTAATGAATCTAGGCACACATATATGTCTAGATTCA
*****TACGTTATAAGACTTTCTAGC*****
.....TATACTACCTCCGTTTCAGGTTAT..... 1 24
.....TACTCCGTTTCAGGTTATAAGAC..... 1 24
.....TCCGTTTCAGGTTATAAGACT..... 2 21
.....GTTTCAGGTTATAAGACTTTCTAGC..... 1 25
.....TCAGGTTATAAGACTTTCTAGCAT..... 25 24
.....CAGGTTATAAGACTTTCT..... 1 18
.....CAGGTTATAAGACTTTCTAGCA..... 2 22
.....CAGGTTATAAGACTTTCTAGCATT..... 3 23
.....CAGGTTATAAGACTTTCTAGCATT..... 14 24
.....AGGTTATAAGACTTTCTAGCA..... 6 21
.....AGGTTATAAGACTTTCTAGCATT..... 1 22
.....AGGTTATAAGACTTTCTAGCATTG..... 2 23
.....AGGTTATAAGACTTTCTAGCATTG..... 1 24
.....GTTATAAGACTTTCTAGCATTGCC..... 6 24
.....TTATAAGACTTTCTAGCAT..... 1 19
.....TTATAAGACTTTCTAGCATT..... 1 20
.....TTATAAGACTTTCTAGCATTG..... 7 21
.....TTATAAGACTTTCTAGCATTGCT..... 1 22
.....TATAAGACTTTCTAGCATT..... 1 19
.....TATAAGACTTTCTAGCATTG..... 1 20
.....ATAAGACTTTCTAGCATT..... 2 18
.....ATAAGACTTTCTAGCATTGCC..... 4 21
.....ATAAGACTTTCTAGCATTGCCA..... 2 23
.....ATAAGACTTTCTAGCATTGCCCTAC..... 2 24
.....ATAAGACTTTCTAGCATTGCCACA..... 1 25
.....TAAGACTTTCTAGCATTGCCCT..... 4 21
.....AAGACTTTCTAGCATTGCCCT..... 1 20
.....AAGACTTTCTAGCATTGCCACAT..... 2 24
.....CTTTCTAGCATTGCCACATTCAT..... 1 24
.....TTCATATAGATGTTAATGAAT..... 2 21
.....ATATAGATGTTAATGAATCTAG..... 1 22
.....ATATAGATGTTAATGAATCTAGGC..... 13 24
.....TATAGATGTTAATGAATCTA..... 1 20
.....ATAGATGTTAATGAATCTAGGC..... 1 22
.....AGATGTTAATGAATCTAGGCAC..... 1 21
.....AGATGTTAATGAATCTAGGCACAC..... 3 24
.....GATGTTAATGAATCTAGGCACACA..... 2 24
.....ATGTTAATGAATCTAGGCACACA..... 2 21
.....ATGTTAATGAATCTAGGCACACA..... 1 23
.....ATGTTAATGAATCTAGGCACACAT..... 2 24
.....GTTAATGAATCTAGGCACACATAT..... 3 24
.....GTTAATGAATCTAGGCACACATATA..... 1 25
.....TTAATGAATCTAGGCACACA..... 4 20
.....TTAATGAATCTAGGCACACAT..... 3 21
.....TTAATGAATCTAGGCACACATATA..... 1 24
.....TAATGAATCTAGGCACACA..... 1 19
.....TAATGAATCTAGGCACACATATAT..... 2 24
.....AATGAATCTAGGCACACATAT..... 1 21
.....AATGAATCTAGGCACACATATAT..... 1 23
.....AATGAATCTAGGCACACATATATG..... 33 24
.....AATGAATCTAGGCACACATATATGT..... 1 25
.....ATGAATCTAGGCACACATATATG..... 6 23
.....ATGAATCTAGGCACACATATATGT..... 10 24
.....ATGAATCTAGGCACACATATATGCT..... 1 25
.....TGAATCTAGGCACACATATATGT..... 1 23
.....GGCACACATATGTCTAGATTCA..... 1 24
.....GCACACATATGTCTAGATTCA..... 1 24

```

```

>osa-miR819k_MIMAT0004078_Oryza_sativa_miR819k
TCCTCGTAAATTTGGAGATATTGTTCTTTGATGGCTACCATAGTACTACCTCCGTTTCAGGTTATAAGACTTTCTAGCATTGCCATATTCATATAGATGTTAATGAACTTGACACACATATGTCTAGATTCATT
*****TCAGGTTATAAGACTTTCTAGC*****
.....TACCTCCGTTTCAGGTTATAAGAC.....          osa-miR819k  22
.....TCCGTTTCAGGTTATAAGACT.....          1  24
.....GTTTCAGGTTATAAGACTTTCTAGC.....          2  21
.....TCAGGTTATAAGACTTTCTAGCAT.....          1  25
.....CAGGTTATAAGACTTTCT.....          25  24
.....CAGGTTATAAGACTTTCT.....          1  18
.....CAGGTTATAAGACTTTCTAGCA.....          2  22
.....CAGGTTATAAGACTTTCTAGCAT.....          3  23
.....CAGGTTATAAGACTTTCTAGCATT.....          14  24
.....AGGTTATAAGACTTTCTAGCA.....          6  21
.....AGGTTATAAGACTTTCTAGCAT.....          1  22
.....AGGTTATAAGACTTTCTAGCATT.....          2  23
.....AGGTTATAAGACTTTCTAGCATTG.....          1  24
.....GTATAAGACTTTCTAGCATGGCC.....          6  24
.....TTATAAGACTTTCTAGCAT.....          1  19
.....TTATAAGACTTTCTAGCATT.....          1  20
.....TTATAAGACTTTCTAGCATTG.....          7  21
.....TTATAAGACTTTCTAGCATGGC.....          1  22
.....TTATAAGACTTTCTAGCATTGGCC.....          2  24
.....TATAAGACTTTCTAGCATT.....          1  19
.....TATAAGACTTTCTAGCATTG.....          1  20
.....ATAAGACTTTCTAGCATT.....          2  18
.....ATAAGACTTTCTAGCATTGGC.....          4  21
.....ATAAGACTTTCTAGCATTGGCC.....          7  22
.....ATAAGACTTTCTAGCATTGGCCA.....          9  23
.....ATAAGACTTTCTAGCATTGGCCAT.....          30  24
.....TAAGACTTTCTAGCATTGGCC.....          18  21
.....TAAGACTTTCTAGCATTGGCCA.....          1  22
.....AAGACTTTCTAGCATTGGCC.....          2  20
.....AAGACTTTCTAGCATTGGCCA.....          2  21
.....AAGACTTTCTAGCATTGGCCATA.....          1  23
.....AAGACTTTCTAGCATTGGCCATAT.....          1  24
.....AGACTTTCTAGCATTGGCCATA.....          1  22
.....CTTTCTAGACTTGCATATATT.....          1  24
.....TTCTAGCATTGGCCATATTCAT.....          1  22
.....TAGCATTGCCATATTCATAT.....          1  21
.....AGCATTGCCATATTCATATAGAT.....          1  24
.....CATATTCATATAGATGTTAATGAA.....          1  24
.....ATATTCATATAGATGTTAATGAT.....          7  24
.....TATTCATATAGATGTTAATGAAT.....          1  23
.....TTTCATATAGATGTTAATGAAT.....          2  21

```

```

>osa-miR820a_MIMAT0004079_Oryza_sativa_miR820a
GTATCCGTAATAATGTGCTAGCAGTATGTTGAAAGATAGACCTCTGACTGTACATCGCTGGCCTCTGGATGGACAGGAGCTCAACATTCCTTAAGGTTGTTCTTCAAACCCATACAAGGTTCCACCGCTGCATT
*****TCGGCCTCTGGATGGACAG*****
.....TCGGCCTCTGGATGGACAG.....          osa-miR820a  21
.....TCGGCCTCTGGATGGACAGG.....          31  22
.....TCGGCCTCTGGATGGACAGGA.....          52  23
.....TCGGCCTCTGGATGGACAGGAG.....          3574  24
.....CGCCCTCTGGATGGACAGG.....          1  21
.....CGCCCTCTGGATGGACAGGAG.....          20  23
.....CGCCCTCTGGATGGACAGGAGC.....          1  24
.....GGCCTCTGGATGGACAGGAG.....          17  22
.....CCTCTGGATGGACAGGAGC.....          1  21

```

```

>osa-miR820b_MIMAT0004080_Oryza_sativa_miR820b
GTATCCGTAATAATGTGCTAGCAGTATGTTGAAAGATAGACCTCTGACTGTACATCGCTGGCCTCTGGATGGACAGGAGCTCAACATTCCTTAAGGTTGTTCTTCCGACCCATACAAGGTTCCGCTGCATT
*****TCGGCCTCTGGATGGACAG*****
.....TCGGCCTCTGGATGGACAG.....          osa-miR820b  21
.....TCGGCCTCTGGATGGACAGG.....          31  22
.....TCGGCCTCTGGATGGACAGGA.....          52  23
.....TCGGCCTCTGGATGGACAGGAG.....          3574  24
.....CGCCCTCTGGATGGACAGG.....          1  21
.....CGCCCTCTGGATGGACAGGAG.....          20  23
.....CGCCCTCTGGATGGACAGGAGC.....          1  24
.....GGCCTCTGGATGGACAGGAG.....          17  22
.....CCTCTGGATGGACAGGAGC.....          1  21

```

```

>osa-miR820c_MIMAT0004081_Oryza_sativa_miR820c
GTATCCGTAATAATGTGCTAGCAGTATGTTGAAAGATAGACCTCTGACTGTACATCGCTGGCCTCTGGATGGACAGGAGCTCAACATTCCTTAAGGTTGTTCTTCCGACCCATACAAGGTTCCGCTGCATT
*****TCGGCCTCTGGATGGACAG*****
.....ATAGACTCTGACTGTACATGC.....          osa-miR820c  21
.....TCGGCCTCTGGATGGACAGG.....          1  23
.....TCGGCCTCTGGATGGACAGGA.....          31  22
.....TCGGCCTCTGGATGGACAGGAG.....          52  23
.....TCGGCCTCTGGATGGACAGGAG.....          3574  24
.....CGCCCTCTGGATGGACAGG.....          1  21
.....CGCCCTCTGGATGGACAGGAG.....          20  23
.....CGCCCTCTGGATGGACAGGAGC.....          1  24
.....GGCCTCTGGATGGACAGGAG.....          17  22
.....CCTCTGGATGGACAGGAGC.....          1  21
.....ACCAGGAGCTGCATTCCTTA.....          1  22
.....TTAAGGTCGTTCTTCCGA.....          1  19
.....TTAAGGTCGTTCTTCCGACCC.....          1  22
.....TTAAGGTCGTTCTTCCGACCCA.....          4  23
.....TCCGACCCATACAAGGTTCCGC.....          1  22

```

```

>osa-miR1425_MIMAT0005959_Oryza_sativa_miR1425
GATTTGAGCTGTGTTAGGCCAACCCGCTGAAGGAGATGCTCCACTGCTGACTGATTAGGATCAATCCTTCTGCTAAATGTTGTTATTCAGCAATATAATGTTACAGCAAGAAGTGGATCTTAATATA
*****TAGGATTCATCCTTCTGCT*****
.....TTAGGATTCATCCTTCTGCT.....          osa-miR1425  21
.....TTAGGATTCATCCTTCTGCT.....          1  18
.....TTAGGATTCATCCTTCTGCT.....          2  19
.....TTAGGATTCATCCTTCTGCTG.....          71  21
.....TTAGGATTCATCCTTCTGCTCT.....          1  22
.....TAGGATTCATCCTTCTGCT.....          3  18
.....TAGGATTCATCCTTCTGCTG.....          16  19
.....TAGGATTCATCCTTCTGCTG.....          28  20
.....TAGGATTCATCCTTCTGCTGCT.....          924  21
.....TAGGATTCATCCTTCTGCTGCTA.....          13  22
.....TAGGATTCATCCTTCTGCTGCTAA.....          22  23
.....TAGGATTCATCCTTCTGCTGCTAAA.....          2  24
.....AGGATTCATCCTTCTGCTG.....          1  18
.....AGGATTCATCCTTCTGCTG.....          1  19
.....AGGATTCATCCTTCTGCTGCT.....          56  20
.....AGGATTCATCCTTCTGCTGCTAA.....          1  22
.....GGATTCATCCTTCTGCTGCT.....          4  19
.....TTACAGCAGCAAGAAGTGGATC.....          4  21
.....TCAGCAGCAAGAAGTGGATCT.....          27  21
.....TCAGCAGCAAGAAGTGGATCTT.....          1  22

```

```

.....CAGCAGCAAGAAGTGGATCTTA... 1 22
.....CAGCAGCAAGAAGTGGATCTTAA... 1 23
.....CAGCAGCAAGAAGTGGATCTTAAT... 6 24
.....AGCAGCAAGAAGTGGATCTTAA... 1 22
.....AGCAGCAAGAAGTGGATCTTAAT... 8 23
.....GCAGCAAGAAGTGGATCTTAA... 4 21
.....GCAGCAAGAAGTGGATCTTAAT... 10 22
.....GCAGCAAGAAGTGGATCTTAATA... 1 23
.....CAGCAAGAAGTGGATCTTA... 3 19
.....CAGCAAGAAGTGGATCTTAA... 3 20
.....CAGCAAGAAGTGGATCTTAAT... 459 21
.....CAGCAAGAAGTGGATCTTAATA... 1 22
.....AGCAAGAAGTGGATCTTAA... 4 19
.....AGCAAGAAGTGGATCTTAAT... 91 20
.....AGCAAGAAGTGGATCTTAATA... 108 21
.....GCAAGAAGTGGATCTTAAT... 1 19

```

```

>osa-miR1427_MIMAT0005961_Oryza_sativa_miR1427
TATATGCGAGTGCAGCAGGAGTGTGCGCTGTTCTGATTGCGTGGCGGTGGCTGCTGCGAACCTGGCGGTGGCGGGCGCCGGCCTGCGGGACCGCGAGTCGCGCGAGCCAGCCACGGACCGCGGCTCCCA
*****TGCGAACCGTGGCGGTGGCG*****
.....CCGTGCTGCGAACCTGGCGGTGG... 6 24
.....CTGCTGCGAACCTGGCGGTGGC... 2 24
.....GTGCTGCGAACCTGGCGGTGG... 1 20
.....GTGCTGCGAACCTGGCGGTGG... 2 22
.....GTGCTGCGAACCTGGCGGTGG... 4 23
.....GTGCTGCGAACCTGGCGGTGG... 1 24
.....TGCCTGCGAACCTGGCGGTGG... 2 22
.....CTGCGAACCTGGCGGTGGC... 2 20
.....CTGCGAACCTGGCGGTGGC... 1 21
.....CTGCGAACCTGGCGGTGGC... 1 22
.....TGCGAACCTGGCGGTGGC... 4 20
.....TGCGAACCTGGCGGTGGC... 58 21
.....GCGAACCTGGCGGTGGC... 1 20
.....GCGAACCTGGCGGTGGC... 1 24
.....GCGAACCTGGCGGTGGCGGCG... TCGGGACCGCGAGTCGCGCGCA... 1 23
.....GCGAACCTGGCGGTGGCGGCG... GCGGGACCGCGAGTCGCGCGCA... 1 24

```

```

osa-miR1427 21
6 24
2 24
1 20
2 22
4 23
1 24
2 22
2 20
1 21
1 22
4 20
58 21
1 20
1 24
1 23

```

```

>osa-miR1429-5p_MIMAT0009208_Oryza_sativa_miR1429-5p
CTGGCCCTCAGGCCCTCCAGTCAAGTCTGGTTCAGAACAGGCGACCCAGATGAAGTAAATACTACTAATCCGTGCATCATCGTATATCTTACACGTCATGAAAGTCATCGTTTATAATGTTGTATTATAA
*****GTAATATACTAATCCGTGCAT*****
.....GTAATATACTAATCCGTGCATCCA...

```

```

osa-miR1429-5p 21
1 24

```

```

>osa-miR810b.1_MIMAT0005977_Oryza_sativa_miR810b.1
TATATACTACTACTGGTAAGTATCTTAAATACTTACCAGTAGATAGTATAGTGAACCCGATATGCGTCATCATCAAGTATTAATTATGCCGTTAGTTAAGCATCGGAGCCACATGTGGTAGCTTACGA
*****TGAACCCGATATGCGTCATC*****
..ATATACTACTACTGGTAAGTA... 2 22
..TATACTACTACTGGTAAGTA... 1 21
..ATACTACTACTGGTAAGTA... 1 20
.....TACTGGTAAGTATCTTAA... 8 21
.....TACTGGTAAGTATCTTAA... 29 22
.....ACTGGTAAGTATCTTAA... 1 20
.....ACTGGTAAGTATCTTAA... 3 21
.....ACTGGTAAGTATCTTAA... 1 22
.....TGGTAAGTATCTTAAAT... 1 21
.....GATAGTATATAGTGAAC... 1 19
.....GATAGTATATAGTGAAC... 9 21
.....ATAGTATATAGTGAACA... 1 19
.....ATAGTATATAGTGAAC... 4 20
.....ATAGTATATAGTGAAC... 5 21
.....ATAGTATATAGTGAAC... 1 22
.....TAGTATATAGTGAACA... 3 18
.....TAGTATATAGTGAACA... 3 19
.....TAGTATATAGTGAAC... 4 21
.....TAGTATATAGTGAACCGA... 31 22
.....AGTATATAGTGAACCGA... 12 21
.....AGTATATAGTGAACCGAT... 16 22
.....GTATATATAGTGAACCGA... 3 20
.....GTATATATAGTGAACCGAT... 1 21
.....TATATATAGTGAACCGATA... 1 21
.....ATATATAGTGAACCGATG... 8 22
.....ATATATAGTGAACCGATGC... 1 23
.....TATATAGTGAACCGATG... 1 21
.....ATATAGTGAACCGATGC... 6 21
.....ATATAGTGAACCGATGCGTCA... 1 25
.....ATAGTGAACCGATGCGTC... 4 21
.....ATAGTGAACCGATGCGTC... 1 22
.....TAGTGAACCGATGCGTC... 2 21
.....TAGTGAACCGATGCGTCA... 6 22
.....TAGTGAACCGATGCGTCAT... 1 23
.....AGTGAACCGATGCGTCA... 1 21
.....AGTGAACCGATGCGTCAT... 6 22
.....AGTGAACCGATGCGTCATC... 1 23
.....AGTGAACCGATGCGTCATCA... 2 24
.....GTGAACCGATGCGTCAT... 1 21
.....TGAACCGATGCGTCATC... 3 21
.....GAACCGATGCGTCAT... 1 19
.....AACCCGATGCGTCATCAT... 1 21
.....AACCCGATGCGTCATCATCA... 1 24
.....ACCGATGCGTCATCATCA... 2 21
.....ACCGATGCGTCATCATCAAG... 2 22
.....CGATGCGTCATCATCAAGT... 2 22
.....ATATGCGTCATCATCAAGT... 32 21
.....ATATGCGTCATCATCAAGT... 5 23
.....TATGCGTCATCATCAAGT... 2 20
.....TATGCGTCATCATCAAGT... 7 21
.....ATGCGTCATCATCAAGT... 2 21
.....AGTATTAATTATGCCGTTA... 1 21
.....ATTATGCCGTTAGTTAAGCATG... 1 23
.....TTATGCCGTTAGTTAAGCATG... 3 21

```

```

osa-miR810b.1 21
2 22
1 21
1 20
8 21
29 22
1 20
3 21
1 22
1 21
1 19
9 21
1 19
4 20
5 21
1 22
3 18
3 19
4 21
31 22
12 21
16 22
3 20
1 21
1 21
8 22
1 23
1 21
6 21
1 25
4 21
1 22
2 21
6 22
1 23
1 21
6 22
1 23
2 24
1 21
3 21
1 19
1 21
1 24
2 21
2 22
32 21
5 23
2 20
7 21
2 21
1 21
1 23
3 21

```

```

>osa-miR1436_MIMAT0005987_Oryza_sativa_miR1436
CATAGTACAATGACTCAGAGTCTTGTACTATGAAGCTCTATCCAGTCCAGTGGTAAACATTATGGGACGGAGGAGTAGTCTCAACTATATAAACTCTAGCACCCTAATCTCACACAGCACACATGTGCCTTC
*****ACATTATGGGACGGAGGAG*****
.....TCATTGTACTATGAAGCTCTA... 2 23
.....ATTGTACTATGAAGCTCTA... 1 21
.....ATGAAGCTCTATCCAGTCC... 1 21
.....AACATTATGGGACGGAGG... 1 19
.....AACATTATGGGACGGAGG... 2 21

```

```

osa-miR1436 21
2 23
1 21
1 21
1 19
2 21

```

.....AACATTATGGACGGAGGAGTAG..... 1 24  
.....ACATTATGGACGGAGG..... 1 18  
.....ACATTATGGACGGAGGAG..... 2 20  
.....ACATTATGGACGGAGGAGT..... 2 21  
.....ATTATGGACGGAGGAGTAG..... 2 21  
.....ATTATGGACGGAGGAGTAGT..... 1 22

>osa-miR1437\_MIMAT0005988\_Oryza\_sativa\_miR1437  
GGCGGAGAGCTTGGCCGGCTCCGCGCACCCGCTACTCTCCCGGTCTGGGAGCTCCGGCGCCACTAGGCACTGTTCTCTCCACCGCGCTCACTCTCTGTGGCCGCTCTCTCTCCG  
\*\*\*\*\*TCCGGCGCCGACTAGGCACTG\*\*\*\*\*  
.....CGTGTGGCAGCTCCGGCC..... osa-miR1437 22  
.....CGAGCTCCGGCGCCGACTAGGCA..... 1 21  
.....GCTCCGGCGCCGACTAGGCA..... 1 21  
.....CTAGGCACTGTTCTCTCC..... 1 19  
.....CTAGGCACTGTTCTCTCTCC..... 3 21  
.....CTAGGCACTGTTCTCTCTCC..... 1 22  
.....TCCCGACGGCCGCTCACTC..... 1 20  
.....ACCTCTGCTCTCTGTGCC..... 1 21  
.....ACCTCTGCTCTCTGTGCCGCGC..... 1 24  
.....CTCTGCTCTCTGTGCCGCG..... 2 21  
.....CTCTGCTCTCTGTGCCGCGC..... 1 23  
.....TCTGCTCTCTGTGCCGCGC..... 29 21  
.....TCTGCTCTCTGTGCCGCGC..... 7 22  
.....TCTGCTCTCTGTGCCGCGCT..... 2 23  
.....CTGCTCTCTGTGCCGCGC..... 3 20  
.....CTGCTCTCTGTGCCGCGC..... 34 21  
.....CTGCTCTCTGTGCCGCGCT..... 5 22  
.....TCTGCTCTCTGTGCCGCGC..... 2 20  
.....TCTGCTCTCTGTGCCGCGC..... 1 21  
.....CGTCTCTGTGCCGCGC..... 1 19  
.....CGTCTCTGTGCCGCGC..... 1 20  
.....CGTCTCTGTGCCGCGC..... 8 21  
.....GTCTCTGTGCCGCGC..... 1 20  
.....GTCTCTGTGCCGCGCTCC..... 1 21  
.....TCCTCTGTGCCGCGCTCT..... 1 21

>osa-miR1441\_MIMAT0005991\_Oryza\_sativa\_miR1441  
GAACAAAGGCGCTGTTAGTTCGGAAGAAATTTGGGTGTACATCGGAGTTAACCGGATGTGGAAAGGTTTTACAGACGAATAAAAAAATAATTTATAAAGCGCTTAAAGCGGAGCAATCTTT  
\*\*\*\*\*ACCAGGATGTGGAAAGGTT\*\*\*\*\*  
.....TTCCGAAAGAAATTTGGG..... osa-miR1441 21  
.....GAAAGAAATTTGGGTGTAC..... 1 23  
.....AAAAGAAATTTGGGTGTAC..... 1 24  
.....AGAAATTTGGGTGTACATC..... 2 23  
.....AAAATTTGGGTGTACATC..... 1 19  
.....AAAATTTGGGTGTACATCGGA..... 3 24  
.....AAAATTTGGGTGTACATC..... 1 20  
.....AAAATTTGGGTGTACATCGGAC..... 24 24  
.....AAAATTTGGGTGTACATCGGAC..... 3 23  
.....AAAATTTGGGTGTACATCGGAC..... 2 24  
.....ATTTTGGGTGTACATCGGA..... 1 21  
.....ATTTTGGGTGTACATCGGAC..... 2 23  
.....ATTTTGGGTGTACATCGGAGCT..... 2 24  
.....ATTTTGGGTGTACATCGGAGTT..... 1 25  
.....TTTTTGGGTGTACATCGGAC..... 1 21  
.....TTTTTGGGTGTACATCGGAGTT..... 1 24  
.....TTTTTGGGTGTACATCGGAC..... 1 20  
.....TTTTTGGGTGTACATCGGAGTT..... 3 23  
.....TTTTTGGGTGTACATCGGAGTT..... 9 24  
.....TTTTTGGGTGTACATCGGAC..... 2 19  
.....TTTTTGGGTGTACATCGGAGTT..... 2 22  
.....TTTTTGGGTGTACATCGGAGTT..... 3 23  
.....TTTTTGGGTGTACATCGGAGTTA..... 1 24  
.....TTTTTGGGTGTACATCGGAGTT..... 1 21  
.....TTTTTGGGTGTACATCGGAGTT..... 1 20  
.....TTTTTGGGTGTACATCGGAGTT..... 3 24  
.....ATCCGAGTTAACCGGATGTCCG..... 2 24  
.....TCGGAGTTAACCGGATGTCCG..... 1 23  
.....CGGAGTTAACCGGATGTCCGA..... 6 23  
.....CGGAGTTAACCGGATGTCCGAA..... 6 24  
.....GGAGTTAACCGGATGTCCGAA..... 1 23  
.....GACGTTAACCGGATGTCCGAA..... 1 23  
.....ACGTTAACCGGATGTCCGA..... 1 20  
.....ACGTTAACCGGATGTCCGAA..... 10 21  
.....ACGTTAACCGGATGTCCGAA..... 1 22  
.....CGTTAACCGGATGTCCGAA..... 1 20  
.....CAGACGAATAAAAAA..... 1 18  
.....AAAAATAATTTATAAAGCGCT..... 1 23  
.....AAATAATTTATAAAGCGCT..... 1 18  
.....AAACCGGAGCAATCTTT..... 1 19

>osa-miR1442\_MIMAT0005992\_Oryza\_sativa\_miR1442  
AATCTAAACAGGATATGACACACATTCAGTACAATGATCTGGCAAAATGTATATCTATATCATAGTACTAGATGTGTGCACATCAGTACTAGTTGGTGTGTTTATGGGCAAGGAGTATGATCTTTGCTAAGTGG  
\*\*\*\*\*ATTCTAGTACTAGTGT\*\*\*\*\*  
.....CATTCAGTACAATGATCTGGAC..... osa-miR1442 20  
.....ATTCTAGTACTAGTGTGCAC..... 1 24  
.....TTTATGGGCAAGGAG..... 1 24  
.....TTTTATGGGCAAGGAG..... 1 19  
.....TTTTATGGGCAAGGAGT..... 1 20

>osa-miR1846d-5p\_MIMAT0007764\_Oryza\_sativa\_miR1846d-5p  
CGCCGCCGAGCTCCCTCTGCTCACTCCCTCGCCCTACTCAGCTGTCCCTCCACCGAGCCGATCTCCAGTGAAGGCCGCGCCGAGATCCGGTGACCCCGTCTCTCTCGCCGGTGTATCCG  
\*\*\*\*\*TCCACCGAGCCGATCTCC\*\*\*\*\*  
.....TCCACCGAGCCGATCT..... 2 21  
.....TCCACCGAGCCGATCTC..... 10 22  
.....TCCACCGAGCCGATCTCC..... 1 23  
.....TCCACCGAGCCGATCTC..... 1 20

>osa-miR1849\_MIMAT0007769\_Oryza\_sativa\_miR1849  
AGCTAACCTAGGATATGGGACATTACCTATAGTATCTGCTAGTAAATGATCCCTATCGTATCTAGTGTGTTATTTGGGACAGGGAATGATGTATGATTAATCTTTGCTACTACAGGATGATCT  
\*\*\*\*\*TATCGTATCTAGTGT\*\*\*\*\*  
.....GCTAACCTAGGATATGGG..... osa-miR1849 21  
.....CTAACCTAGGATATGGGAC..... 1 21  
.....CTAACCTAGGATATGGGAC..... 1 22  
.....ATCTAGATCTGTTACTAGTAA..... 1 23  
.....AATGCCCTATCGTATCTAGTGT..... 1 24  
.....TATCGTATCTAGTGT..... 10 24  
.....TATCGTATCTAGTGT..... 4 20  
.....TATCGTATCTAGTGT..... 17 21

```

.....ATGATATCTAGTTGGTTT..... 1 20
.....ATCGTATCTAGTTGGTTTA..... 1 21

>osa-miR1846a-5p_MIMAT0007788_Oryza_sativa_miR1846a-5p
CCTCAACTACTGCGCGTCCACCATTCGCCCTCCCTCAATGAGCGCCGATCTCCAGTGAGGAGCCGGGGCCGCTGGATCCGGTGACCCGTTCTCTCGCCGGGATCCGGCGCTCAGAGAAAGGAGCAGGA
*****AGTGAGGAGCCGGGGCCGCT*****
.....TCTCCAGTGAGGAGCCGGG..... 1 21
.....TCTCCAGTGAGGAGCCGGG..... 1 22
.....AGTGAGGAGCCGGGGCCGCTGGA..... 1 24
.....GAGGAGCCGGGGCCGCTGGA..... 1 21

>osa-miR1846a-3p_MIMAT0007789_Oryza_sativa_miR1846a-3p
CGCTCCCTCAATGAGCCCGGATCTCCAGTGAGGAGCCGGGGCCGCTGGATCCGGTGACCCGTTCTCTCGCCGGGATCCGGCGCTCAGAGAAAGGAGCAGGAACCCTGCTCC
*****AGTGAGGAGCCGGGGCCGCT*****
.....TCTCCAGTGAGGAGCCGGG..... 1 21
.....TCTCCAGTGAGGAGCCGGG..... 1 22
.....AGTGAGGAGCCGGGGCCGCTGGA..... 1 24
.....GAGGAGCCGGGGCCGCTGGA..... 1 21

>osa-miR1846b-5p_MIMAT0007790_Oryza_sativa_miR1846b-5p
CCTCAACTACTGCGCGTCCACCATTCGCCCTCCCTCAATGAGCGCCGATCTCCAGTGAGGAGCCGGGGCCGCTGGATCCAGTGACCCGTTCTCTCGCCGGGATCCGGCGCTCAGAGAAAGGAGCAGGA
*****AGTGAGGAGCCGGGGCCGCT*****
.....TCTCCAGTGAGGAGCCGGG..... 1 21
.....TCTCCAGTGAGGAGCCGGG..... 1 22
.....AGTGAGGAGCCGGGGCCGCTGGA..... 1 24
.....GAGGAGCCGGGGCCGCTGGA..... 1 21

>osa-miR1860-3p_MIMAT0007794_Oryza_sativa_miR1860-3p
TGTAAGAGAAACAGCTCCAGATCTCGAATTCGCTCAAACTATCTTCTCTGTAGATCTGGAAGCTAGTTTCTTCTTACAATAACACTATTTTCCCCATTAGTCTGCCCTGTGTCAGCAGGATGCCGCGC
*****ATCTGGAAGCTAGTTTTCTCT*****
.....TGCTCAAACTATCTTCTCT..... 1 22
.....CTCTGTAGATCTGGAAGCTAGTT..... 1 25
.....TCTGTAGATCTGGAAGCTA..... 1 20
.....GATCTGGAAGCTAGTTTTCTCT..... 1 23

>osa-miR1884a_MIMAT0007795_Oryza_sativa_miR1884a
GTAGTACCTTGTGTCTAGATGACCTCAATATGTACTACTATTCAAAATGTGACCGCTTACTTTATCACAACGTTGACCATCTGTCTATTCAAAAATTAACATAAATGTAAGTATAAGTT
*****GTGACCGCTTACTTTTCA*****
.....ATGTGACCGCTTACTTTCA..... 2 24
.....TGTGACCGCTTACTTTCA..... 1 20
.....TGTGACCGCTTACTTTCA..... 5 21
.....TGTGACCGCTTACTTTCA..... 16 22
.....TGTGACCGCTTACTTTCA..... 2 23
.....AACGTTTGACCATCTGCT..... 1 19
.....AACGTTTGACCATCTGCTTAT..... 1 22
.....AACGTTTGACCATCTGCTTAT..... 1 23
.....GTTTGACCATCTGCTTATCAAA..... 1 24
.....TTGACCATCTGCTTATCAAA..... 2 21
.....TTGACCATCTGCTTATCAAAA..... 1 24
.....TGACCATCTGCTTATCAAA..... 1 21
.....TGACCATCTGCTTATCAAAA..... 1 22
.....ACCATCTGCTTATCAAAA..... 1 21
.....CCATTGCTTATCAAAA..... 2 20

>osa-miR1861d_MIMAT0007799_Oryza_sativa_miR1861d
TACATCTCTCTTATAAAGTTCTGCTGGTCAACTGTGTTGCATATCTTAGCGTGTCTGAGGAGGAAGTGTGTTGAACTCGCTATGTTGTTCTACTCGGACCGGTTCTGTTCCCAAGC
*****TGCTTGAGGAGGAAGTGTGTTGAACTCGCTATGTTGTTCTACTCGGACCGGTTCTGTTCCCAAGC*****
.....TCTTGAGGAGGAAGTGTGTT..... 1 19
.....TGAGGAGGAAGTGTGTTGTT..... 1 24

>osa-miR1862a_MIMAT0007810_Oryza_sativa_miR1862a
AGATTGGTACTCCCTCGCCGAAATACCAACCTCTAGGACATGCATCCTAGTACGAGTGGTTATTTTGGACGGAGGAGTATCCCTACAATATATATTTTTGTTATGGCACAATATCATATCATGCAT
*****ACGAGTGGTTATTTTGGACGG*****
.....CGAGTGGTTATTTTGGACGG..... 1 24
.....GAGTGGTTATTTTGGACGG..... 1 23
.....GAGTGGTTATTTTGGACGG..... 4 24
.....AGGTGGTTATTTTGGACGG..... 3 24
.....GTTGGTTATTTTGGACGGAG..... 1 23
.....TTGGTTATTTTGGACGGAG..... 59 21
.....TGGTTATTTTGGACGGAG..... 6 20
.....TGGTTATTTTGGACGGAG..... 1 24
.....GGTTATTTTGGACGGAG..... 1 19
.....GGTTATTTTGGACGGAGGAGT..... 1 24
.....TTATTTTGGACGGAGGAGTAT..... 1 24
.....TTATTTTGGACGGAGGAGTA..... 2 22
.....TATTTTGGACGGAGGAG..... 1 19
.....TTTTGGACGGAGGAGTAT..... 1 20

>osa-miR1862b_MIMAT0007811_Oryza_sativa_miR1862b
CAAGATTGGCACATAGTACTACGAATCTGGATATCTAGGATGTGTCACTCCCTAGCAGGTGGTTATTTTGGACGGAGGAGTATCCGGATGCTCCAGCATCTCATGACCTATAAGTTTATCCGT
*****ACGAGTGGTTATTTTGGACGG*****
.....AGATTGGCACATAGTACTAC..... 2 24
.....TTGGCACATAGTACTACGA..... 1 22
.....ACATCATAGTACTACGA..... 1 18
.....ACTACGAATCTGGATATCTAGGA..... 3 24
.....ACGAATCTGGATATCTAGGATGT..... 1 24
.....TCTGGATATCTAGGATGTGCAC..... 8 24
.....CGAGTGGTTATTTTGGACGG..... 1 24
.....GAGTGGTTATTTTGGACGG..... 1 23
.....GAGTGGTTATTTTGGACGG..... 4 24
.....AGGTGGTTATTTTGGACGG..... 3 24
.....GTTGGTTATTTTGGACGGAG..... 1 23
.....TTGGTTATTTTGGACGGAG..... 59 21
.....TGGTTATTTTGGACGGAG..... 6 20
.....TGGTTATTTTGGACGGAGGAG..... 1 24
.....GGTTATTTTGGACGGAG..... 1 19
.....TATTTTGGACGGAGGAG..... 1 19
.....TTTTGGACGGAGGAGG..... 1 18

>osa-miR1862c_MIMAT0007812_Oryza_sativa_miR1862c
TATCTACTCCCTCGTCCCAAAATAGTCACTCCGATATGACACTTCTAGTACGAGTGGTTATTTTGGACGGAGGAGTATGACACCTGATATGTAAGTGGCCATATATACATAGGAAGTATAGC
*****ACGAGTGGTTATTTTGGACGG*****
.....CGAGTGGTTATTTTGGACGG..... 1 24

```

```

.....GAGGTTGGTTATTTGGGACGG..... 1 23
.....GAGGTTGGTTATTTGGGACGGA..... 4 24
.....AGGTTGGTTATTTGGGACGGAG..... 3 24
.....TTGGTTATTTGGGACGGAG..... 59 21
.....TGTTTATTTGGGACGGAG..... 6 20
.....TGTTTATTTGGGACGGAGA..... 3 21
.....TGTTTATTTGGGACGGAGAG..... 1 24
.....GGTTTATTTGGGACGGAG..... 1 19
.....TTTATTTGGGACGGAGAG..... 2 21
.....ATTTGGACGGAGAGTAG..... 5 21
.....TTTTGGACGGAGAGT..... 1 18
.....TTTTGGACGGAGAGTAG..... 1 21
.....TGGACGGAGAGTAGATGACA..... 1 23

```

```

>osa-miR1863_MIMAT0007813_Oryza_sativa_miR1863
TGATGGAAGGTTTGCACATAATTTGGTACCAAGTTGCAGTATGGGGAAGCAATAAGCTCTGATACCATGTTAGATTAGTGATGCTCATCCTGATGTTGTGTTGAAGGAATAAACTGGAATATGTTGTGAGA
*****AGCTCTGATACCATGTTAGATTAG*****
.....ATAAGCTCTGATACCATGTTA..... 1 21
.....TAAGCTCTGATACCATGTTAG..... 2 21
.....AAGCTCTGATACCATGTTAGA..... 1 21
.....AAGCTCTGATACCATGTTAGATTA..... 2 24
.....AGCTCTGATACCATGTTAGA..... 21 20
.....AGCTCTGATACCATGTTAGAT..... 9 21
.....AGCTCTGATACCATGTTAGATTA..... 4 23
.....AGCTCTGATACCATGTTAGATTAG..... 458 24
.....GCTCTGATACCATGTTAGA..... 1 19
.....GCTCTGATACCATGTTAGATTAG..... 29 23
.....TCTGATACCATGTTAGAT..... 1 18
.....TCTGATACCATGTTAGATTAG..... 1 21
.....TCTGATACCATGTTAGATTAGTAG..... 3 24
.....ATACCATGTTAGATTAGTAGAT..... 1 21
.....TACCATGTTAGATTAGTAGATA..... 3 21

```

```

>osa-miR1864_MIMAT0007814_Oryza_sativa_miR1864
GTTGCCATGAGAGACTCCCAACACCCACCCCTTTGGTTGTGTCGGAAGAACATTGTAGTAACGTGTTGTAATGTGATGATCATGCTCTTCTATAGTAACGCGTAAATATAGTCATGATGGATCTAGG
*****TTGTAGTAACGTGTTGTAATGTGATGATCATGCTCTTCTATAGTAACGCGTAAATATAGTCATGATGGATCTAGG*****
.....AACATTTGTAACGTGATGTT..... 1 22
.....CATTGTAGTAACGTGATGGTCAAT..... 1 24
.....CATTGTAGTAACGTGATGGTCAATGT..... 1 26
.....ATTGTAGTAACGTGATGGTCAATG..... 4 24
.....TTGTAGTAACGTGATGGTCAA..... 2 21
.....TTGTAGTAACGTGATGGTCAAT..... 1 22
.....TTGTAGTAACGTGATGGTCAATG..... 3 23
.....TTGTAGTAACGTGATGGTCAATGT..... 6 24
.....TGTAAGTAACGTGATGGTCAAT..... 2 21
.....TGTAAGTAACGTGATGGTCAATGT..... 3 24
.....GTAACGTGATGGTCAATGT..... 1 21

```

```

>osa-miR1865-5p_MIMAT0007815_Oryza_sativa_miR1865-5p
GCATATGTTCCATATCTGGGCTCACATCTGCTGACCTTAACCTCGGAACCTGAACTACTGCTAGTGTGTTGATCTTCGACACAGTATTGCGCGAGTTTGGCTTCATCATCGCGTCTGCACATGTTGACGAAGCCTGA
*****TGCTAGTGATGGTATTCTTCGAC*****
.....TGCTAGTGATGGTATTCTTCGAC..... 3 23
.....TGCTAGTGATGGTATTCTTCGAC..... 33 24
.....GCTAGTGATGGTATTCTTCGAC..... 1 23
.....TAGTGATGGTATTCTTCGAC..... 1 21
.....AGTGATGGTATTCTTCGAC..... 1 21

```

```

>osa-miR1867_MIMAT0007818_Oryza_sativa_miR1867
AAAAACAATCTAGCTTTGCATTTGGATAAACACTTTGACAGTTAAAGTTAGGAATGTTTTTTTCTAGGACAGAGGAGTAGATGTAATTTGTCATAGGAAGTGGTAGTCCAGTGGCACAACCTGTTGGTGG
*****TTTTTTTTCTAGGACAGAGGAGT*****
.....AATTGTTTTTTCTAGGACAGAG..... 1 23
.....AATTGTTTTTTCTAGGACAGAGG..... 26 25
.....ATTGTTTTTTCTAGGACAGAGG..... 3 24
.....TTGTTTTTTCTAGGACAGAGCA..... 1 19
.....TTGTTTTTTCTAGGACAGAGGGA..... 1 25
.....TGTTTTTTCTAGGACAGAG..... 1 21
.....GTTTTTTCTAGGACAGAGGAG..... 33 24
.....GTTTTTTCTAGGACAGAGGAGT..... 3 25
.....TTTTTTTTCTAGGACAGAGGGA..... 2 22
.....TTTTTTTTCTAGGACAGAGGAG..... 1 23
.....TTTTTTTTCTAGGACAGAGGAGT..... 41 24
.....TTTTTTTTCTAGGACAGAGGAGTA..... 1 25
.....TTTTTTCTAGGACAGAGGAG..... 3 22
.....TTTTTTCTAGGACAGAGGAGT..... 11 23
.....TTTTTTCTAGGACAGAGGAG..... 1 22
.....TTTTTTCTAGGACAGAGG..... 1 18
.....TTTTTTCTAGGACAGAGGAG..... 1 20
.....TTTTTTCTAGGACAGAGGAGT..... 6 21
.....TTTTTTCTAGGACAGAGGAGTAGA..... 8 24
.....TCTAGGACAGAGGAGTAGATGTG..... 3 24
.....TAGGACAGAGGAGTAGATGT..... 9 21
.....AGGACAGAGGAGTAGATGTG..... 1 21
.....AGGACAGAGGAGTAGATGTG..... 1 22
.....GGACAGAGGAGTAGATGTG..... 1 21
.....ACAGAGGAGTAGATGTGTA..... 4 21
.....CAGAGGAGTAGATGTGTAAT..... 3 21
.....AGGAGTAGATGTGTAATTTGTGC..... 2 24

```

```

>osa-miR1868_MIMAT0007820_Oryza_sativa_miR1868
GAGTTGATAACAATGGAAGGCTTTGATAAACACTATTGACAGTTGGAAGCTGCTCAGGAAAACGAGGAGCAGCAAGGACTTGTCTACCGGTTATGAATGGCTACTCTGTTTCCGTAACACGCTTC
*****TACGGAAGAACGAGGAGCAGCA*****
.....TTTGAAGCTGCTCAGGAAAA..... 1 24
.....TGAAGCTGCTCAGGAAAA..... 15 21
.....TGAAGCTGCTCAGGAAAA..... 2 22
.....GGAAGCTGCTCAGGAAAAACA..... 2 24
.....GAAAGCTGCTCAGGAAAAACGAG..... 5 24
.....AAGCTGCTCAGGAAAAACGAGG..... 3 24
.....AAGCTGCTCAGGAAAAACGAGGA..... 1 25
.....AGCTGCTCAGGAAAAACGAGG..... 1 23
.....AGCTGCTCAGGAAAAACGAGGA..... 17 24
.....GCTGCTCAGGAAAAACGAGGAG..... 92 24
.....TCAGGAAAAACGAGGAGCAG..... 3 21
.....TCAGGAAAAACGAGGAGCAGCA..... 113 24
.....CACGAAAAACGAGGAGCAGC..... 4 21
.....CACGAAAAACGAGGAGCAGCA..... 3 23
.....CACGAAAAACGAGGAGCAGCAA..... 5 24
.....ACGAAAAACGAGGAGCAGC..... 2 21

```

```

.....ACGGAAAAAGGGAGCAGCA..... 5 22
.....ACGGAAAAAGGGAGCAGCA..... 5 23
.....ACGGAAAAAGGGAGCAGCA..... 32 24
.....CGGAAAAAGGGAGCAGCA..... 1 22
.....CGGAAAAAGGGAGCAGCA..... 1 23
.....GAAAAAGGGAGCAGCAAGGCA..... 1 24
.....CGGGAGCAGCAAGGCA..... 1 19
.....GCTACTCTCGTTTCC..... 2 18
.....TCCTGTTTCCGTAACACGCTT..... 1 24

```

```

>osa-miR1812f_MIMAT0007821_Oryza_sativa_miR1812f
ACAATAGTACTTTATGTGACTTATGTTCTTACGTTTTTCAAAAAAATAAATAAACGGATGATTAAGTTGGACACGAAATTCATGGCTATGCTTATTTGGACGGAATCTTAGCTTGGGTGGATTGATC
*****ACGGATGATTAAGTTGGACACGG*****
...AATAGTACTTTATGTGACTTA.....
.....ACGGATGATTAAGTTGGACACGG..... 1 23
.....ACGGATGATTAAGTTGGACACGG..... 1 23
.....ACGGATGATTAAGTTGGACACGG..... 4 24
.....CGGATGATTAAGTTGGACACGGA..... 1 24
.....GGATGATTAAGTTGGACACGGAA..... 3 24
.....GATGATTAAGTTGGACACGGA..... 1 23
.....GATGATTAAGTTGGACACGGA..... 23 24
.....ATGATTAAGTTGGACACGG..... 1 19
.....ATGATTAAGTTGGACACGGAAT..... 1 24
.....ATTAAGTTGGACACGGA..... 1 18
.....ATTAAGTTGGACACGGAAT..... 1 21
.....TTAAAGTTGGACACGGA..... 1 19
.....TTAAAGTTGGACACGGAAT..... 1 21
.....GTTGGACACGGAATTCATGGCTA..... 1 24
.....GGCTATGCTTATTTGGACGGAA..... 1 24

```

```

>osa-miR1869_MIMAT0007822_Oryza_sativa_miR1869
ATCCTTGATCCCTCTTTGATAACTCGTCAAGCCAAAAGGAAGGAAAGAACACCTGAGAACAAATAGGCATGGGAGTATTGGAAAAACACAGGACATATTGTGCCCTAATTTAAAGGAAATGATGTTGAGGC
*****TGAGAACAAATAGGCATGGGAGT*****
.....AGGAAAGGAACACCTGAGCA..... 2 21
.....AGGAAAGGAACACCTGAGCA..... 1 21
.....GGAACCTGAGAACAAATAGGCAT..... 1 24
.....ACACCTGAGAACAAATAGGCA..... 2 21
.....ACACCTGAGAACAAATAGGCAT..... 2 21
.....CCTGAGAACAAATAGGCATGGG..... 1 21

```

```

>osa-miR1870_MIMAT0007823_Oryza_sativa_miR1870
TAGCTGAGTGAAGTCTTAGTGTCAAAGTAATGGAGATTGGGAAATAAATCGGTTTCATGCTGAATTAGACCTAGTGGGCATTATACATCAACAACATGGTACTGTTGCCCTTCTTTCTAGCCTAGTGTGTGAT
*****TGCTGAATTAGACCTAGTGGGCAT*****
.....CTGGCTTCATGCTGAATTAGACCT..... 1 24
.....TTATGCTGAATTAGACCTAG..... 2 21
.....TTATGCTGAATTAGACCTAGT..... 11 22
.....TTATGCTGAATTAGACCTAGT..... 1 23
.....TTATGCTGAATTAGACCTAGTG..... 1 24
.....ATGCTGAATTAGACCTAGTGGCA..... 14 24
.....TGCTGAATTAGACCTAGTGGCA..... 6 23
.....TGCTGAATTAGACCTAGTGGGCAT..... 1313 24
.....TGCTGAATTAGACCTAGTGGGCATT..... 4 25
.....GCTGAATTAGACCTAGTGGGCAT..... 107 23
.....GCTGAATTAGACCTAGTGGGCATT..... 5 24
.....CTGAATTAGACCTAGTGGGCAT..... 1 22
.....TGAATTAGACCTAGTGGCA..... 1 20
.....TGAATTAGACCTAGTGGGCAT..... 79 21
.....TGAATTAGACCTAGTGGGCATT..... 1 22
.....GAATTAGACCTAGTGGGCAT..... 1 20
.....AATTAGACCTAGTGGGCAT..... 1 19
.....AATTAGACCTAGTGGGCATT..... 1 21
.....AATTAGACCTAGTGGGCATTAT..... 2 23
.....AATTAGACCTAGTGGGCATTATA..... 33 24
.....AATTAGACCTAGTGGGCATTATAC..... 1 25
.....ATTAGACCTAGTGGGCAT..... 2 18
.....ATTAGACCTAGTGGGCATT..... 1 19
.....ATTAGACCTAGTGGGCATT..... 2 20
.....ATTAGACCTAGTGGGCATTAT..... 2 21
.....ATTAGACCTAGTGGGCATTATAT..... 15 22
.....ATTAGACCTAGTGGGCATTATATA..... 61 23
.....ATTAGACCTAGTGGGCATTATAC..... 858 24
.....ATTAGACCTAGTGGGCATTATACA..... 3 25
.....TTAGACCTAGTGGGCATTATAC..... 11 23
.....TTAGACCTAGTGGGCATTATACA..... 1 24
.....TAGACCTAGTGGGCATTATAC..... 1 22
.....AGTGGGCATTATACATCAACA..... 1 21
.....AGTGGGCATTATACATCAACA..... 336 24
.....AGTGGGCATTATACATCAACAAC..... 48 25
.....GTGGGCATTATACATCAACA..... 3 23
.....TGGGCATTATACATCAACA..... 1 21
.....TGGGCATTATACATCAACA..... 6 24
.....GGCATTATACATCAACA..... 1 22

```

```

>osa-miR1871_MIMAT0007824_Oryza_sativa_miR1871
TTCTCTCAAATCTAACATGGTATCGGATAGGTGAGCCATGATCACTTAAAGCTATGGCTCTGATATCATGTTGGTTTGAAGAAATGACTGATATATTTCAATGTAGCCAGTATGCTATATATAGAGCATATAG
*****ATGGCTCTGATATCATGTTGGTT*****
.....ATGGCTCTGATATCATGTTGGTT..... 1 23
.....ATGGCTCTGATATCATGTTGGTT..... 5 24
.....TGGCTCTGATATCATGTTGGTT..... 1 24
.....ATATCATGTTGGTTTGAAGGAA..... 1 23
.....ATATCATGTTGGTTTGAAGGAA..... 3 24
.....CATGTTGGTTTGAAGGAAATG..... 1 22

```

```

>osa-miR1872_MIMAT0007825_Oryza_sativa_miR1872
ACCCCTTTCTAAATTTGATAAATCTCAATGCTGTGGAGACTTATGGTTGAAGTCTGTAAGTCTGTGACGGTAAACGAGCATGTACCGTGGGCAACCGCATGGCAATGTACCTGCCCTCATGTAGTAAC
*****GAACTGTAAGTCTGTGACGGTAA*****
.....AATGCTTTGGAGACTTATGGTT.....
.....TTGAAGTCTGTAAGTCTGTGACGGT..... 1 24
.....TGAAGTCTGTAAGTCTGTGACGGTAA..... 2 24
.....GAACTGTAAGTCTGTGACGG..... 1 20
.....GAACTGTAAGTCTGTGACGGTAA..... 1 23
.....GAACTGTAAGTCTGTGACGGTAA..... 4 24
.....AACTGTAAGTCTGTGACGGTAA..... 1 24
.....TGTAAAGTCTGTGACGGTAAACG..... 1 23
.....AAGTCTGTGACGGTAAACGAGCA..... 1 24
.....TGACGGTAAACGAGCATGTAC..... 1 22
.....CATGTACCGTGGCAACCGGCA..... 1 23
.....ACCGTGGCAACCGCATGGACA..... 1 24

```

|                                                                                                                                          |                |    |
|------------------------------------------------------------------------------------------------------------------------------------------|----------------|----|
| .....TGGCAACCGCATGGACAAT.....                                                                                                            | 1              | 21 |
| <br>                                                                                                                                     |                |    |
| >osa-miR1873_MIMAT0007826_Oryza_sativa_miR1873                                                                                           |                |    |
| GATTGCCACCTTTTCCCAATAATTAAAGCTCTGGATTGGCTGTAGATTGAACCTCAACATGGTATCAGAGCTGGAAGCTCTAAAGTTGACATCATGATAGCTGACGATGGTGGAGACCATGTAAGCTGATACCAT  |                |    |
| *****TCAACATGGTATCAGAGCTGGAAG*****                                                                                                       | osa-miR1873    | 24 |
| .....ACCTCAACATGGTATCAGAGCT.....                                                                                                         | 1              | 21 |
| .....ACCTCAACATGGTATCAGAGCTGG.....                                                                                                       | 4              | 24 |
| .....CCTCAACATGGTATCAGAGCTGG.....                                                                                                        | 1              | 23 |
| .....CCTCAACATGGTATCAGAGCTGGA.....                                                                                                       | 1              | 24 |
| .....CTCAACATGGTATCAGAGCTGGA.....                                                                                                        | 1              | 23 |
| .....CTCAACATGGTATCAGAGCTGGA.....                                                                                                        | 1              | 24 |
| .....TCAACATGGTATCAGAGCTGG.....                                                                                                          | 3              | 21 |
| .....TCAACATGGTATCAGAGCTGGA.....                                                                                                         | 2              | 23 |
| .....TCAACATGGTATCAGAGCTGGAAG.....                                                                                                       | 14             | 24 |
| .....AACATGGTATCAGAGCTGG.....                                                                                                            | 3              | 19 |
| .....ACATGGTATCAGAGCTGGAAG.....                                                                                                          | 2              | 21 |
| .....ATCAGAGCTGGAAGCTCTAA.....                                                                                                           | 1              | 21 |
| .....ATCAGAGCTGGAAGCTCTAAAGT.....                                                                                                        | 1              | 23 |
| <br>                                                                                                                                     |                |    |
| >osa-miR1874-3p_MIMAT0007828_Oryza_sativa_miR1874-3p                                                                                     |                |    |
| TACACCATCCATAAGGGTTCCGAATCTTCGATGTGCCTAGATAGGGTACAGTTGGATCCATATGGATGGAGTGTAAACCCGATGCCTTTTACAATAGATGGTTATTTTTTATGATCCACTCTTTGTTTCTTTCTTC |                |    |
| *****TATGGATGGAGGTGAACCCGATG*****                                                                                                        | osa-miR1874-3p | 24 |
| .....TATGGATGGAGGTGAACCCGAT.....                                                                                                         | 1              | 23 |
| .....TATGGATGGAGGTGAACCCGATG.....                                                                                                        | 1              | 24 |
| <br>                                                                                                                                     |                |    |
| >osa-miR1875_MIMAT0007829_Oryza_sativa_miR1875                                                                                           |                |    |
| GTACATGGCACTTTAAACAGTATTTGATACAGTACTAGGCTGCAGTTGAGCGAAACACAATGGAGTGAAGTGAACAGAAATGAACATTATGGCAGAAAGTAAAGTTTGTCAAACCTCGGGGACAAGTGAATTTTG  |                |    |
| *****ACAATGGAGTGAAGTGAACAGAA*****                                                                                                        | osa-miR1875    | 24 |
| .....ATTGATACAGTACTAGGC.....                                                                                                             | 2              | 20 |
| .....TTTGATACAGTACTAGGCT.....                                                                                                            | 1              | 20 |
| .....AGTGAAGTGGCTGCAGTTGAG.....                                                                                                          | 1              | 21 |
| .....ACAATGGAGTGAAGTGAACAA.....                                                                                                          | 6              | 22 |
| .....ACAATGGAGTGAAGTGAACAG.....                                                                                                          | 8              | 23 |
| .....ACAATGGAGTGAAGTGAACAGAA.....                                                                                                        | 14             | 24 |
| .....ACAATGGAGTGAAGTGAACAGAAA.....                                                                                                       | 3              | 25 |
| .....CAATGGAGTGAAGTGAACAG.....                                                                                                           | 1              | 21 |
| .....AATGGAGTGAAGTGAACAG.....                                                                                                            | 1              | 20 |
| .....AATGGAGTGAAGTGAACAGAA.....                                                                                                          | 1              | 21 |
| .....AATGGAGTGAAGTGAACAGAAA.....                                                                                                         | 6              | 22 |
| .....AATGGAGTGAAGTGAACAGAAA.....                                                                                                         | 7              | 23 |
| .....ATGGAGTGAAGTGAACAG.....                                                                                                             | 3              | 19 |
| .....ATGGAGTGAAGTGAACAGAA.....                                                                                                           | 4              | 20 |
| .....ATGGAGTGAAGTGAACAGAAA.....                                                                                                          | 10             | 21 |
| .....ATGGAGTGAAGTGAACAGAAA.....                                                                                                          | 25             | 22 |
| .....ATGGAGTGAAGTGAACAGAAAT.....                                                                                                         | 1              | 23 |
| .....ATGGAGTGAAGTGAACAGAAATG.....                                                                                                        | 1              | 24 |
| .....GGAGTGAAGTGAACAGAAAT.....                                                                                                           | 1              | 21 |
| .....TGAAGTGAACAGAAATGAAC.....                                                                                                           | 1              | 21 |
| .....ACAGAAATGAACATTATGGCA.....                                                                                                          | 1              | 21 |
| .....AACTGCGGGGACAAGTGA.....                                                                                                             | 3              | 21 |
| <br>                                                                                                                                     |                |    |
| >osa-miR1862d_MIMAT0007830_Oryza_sativa_miR1862d                                                                                         |                |    |
| ACTCCCTCTGTCCAAAATAAACAAAGCTAGTACGGGATGTGGCACTTCCTAGTCTGACTAGGTTGTTTATTTTGGGACGGAGGATATCATAGTTGTTACTCTCTGTTACTATTTATCTTTTGGCTCCTAACCT    |                |    |
| *****ACTAGGTTGTTTATTTTGGGACG*****                                                                                                        | osa-miR1862d   | 24 |
| .....CCAAAATAAACAAAGCTAGTAC.....                                                                                                         | 1              | 22 |
| .....CAAAATAAACAAAGCTAGTACGGG.....                                                                                                       | 1              | 24 |
| .....AAAATAAACAAAGCTAGTACGGGG.....                                                                                                       | 10             | 24 |
| .....AAATAAACAAAGCTAGTACGGGG.....                                                                                                        | 11             | 23 |
| .....AAATAAACAAAGCTAGTACGGGG.....                                                                                                        | 1              | 24 |
| .....AAATAAACAAAGCTAGTACGGGG.....                                                                                                        | 1              | 22 |
| .....AAACAAGCTAGTACGGGGATGT.....                                                                                                         | 1              | 23 |
| .....AACTAGTACGGGGATGTGCCA.....                                                                                                          | 1              | 22 |
| .....AACTAGTACGGGGATGTGCCAC.....                                                                                                         | 1              | 23 |
| .....TACTAGGTTGTTTATTTTGGGACG.....                                                                                                       | 1              | 25 |
| .....ACTAGGTTGTTTATTTTGG.....                                                                                                            | 1              | 19 |
| .....ACTAGGTTGTTTATTTTGGGA.....                                                                                                          | 9              | 22 |
| .....ACTAGGTTGTTTATTTTGGGAC.....                                                                                                         | 13             | 23 |
| .....ACTAGGTTGTTTATTTTGGGACG.....                                                                                                        | 301            | 24 |
| .....CTAGGTTGTTTATTTTGGG.....                                                                                                            | 1              | 20 |
| .....CTAGGTTGTTTATTTTGGGA.....                                                                                                           | 2              | 21 |
| .....CTAGGTTGTTTATTTTGGGACG.....                                                                                                         | 13             | 23 |
| .....CTAGGTTGTTTATTTTGGGACGG.....                                                                                                        | 53             | 24 |
| .....TAGGTTGTTTATTTTGGGAC.....                                                                                                           | 2              | 21 |
| .....TAGGTTGTTTATTTTGGGACG.....                                                                                                          | 15             | 22 |
| .....TAGGTTGTTTATTTTGGGACGG.....                                                                                                         | 46             | 23 |
| .....TAGGTTGTTTATTTTGGGACGGA.....                                                                                                        | 154            | 24 |
| .....TAGGTTGTTTATTTTGGGACGGAG.....                                                                                                       | 3              | 25 |
| .....AGGTTGTTTATTTTGGGACGG.....                                                                                                          | 6              | 22 |
| .....AGGTTGTTTATTTTGGGACGGA.....                                                                                                         | 14             | 23 |
| .....AGGTTGTTTATTTTGGGACGGAG.....                                                                                                        | 63             | 24 |
| .....GGTTGTTTATTTTGGGACGG.....                                                                                                           | 1              | 21 |
| .....GGTTGTTTATTTTGGGACGGA.....                                                                                                          | 1              | 22 |
| .....GGTTGTTTATTTTGGGACGGAG.....                                                                                                         | 16             | 23 |
| .....GGTTGTTTATTTTGGGACGGAGG.....                                                                                                        | 172            | 24 |
| .....GTTGTTTATTTTGGGACGGAGG.....                                                                                                         | 2              | 23 |
| .....GTTGTTTATTTTGGGACGGAGG.....                                                                                                         | 1              | 24 |
| .....TTGTTTATTTTGGGACGGGA.....                                                                                                           | 2              | 20 |
| .....TTGTTTATTTTGGGACGGAG.....                                                                                                           | 14             | 21 |
| .....TTGTTTATTTTGGGACGGAGG.....                                                                                                          | 1              | 22 |
| .....TTGTTTATTTTGGGACGGAGGA.....                                                                                                         | 1              | 24 |
| .....TTGTTTATTTTGGGACGG.....                                                                                                             | 1              | 18 |
| .....TTGTTTATTTTGGGACGGAG.....                                                                                                           | 3              | 20 |
| .....TTGTTTATTTTGGGACGGAGG.....                                                                                                          | 10             | 21 |
| .....TGTTTATTTTGGGACGGAGGAGT.....                                                                                                        | 4              | 24 |
| .....TTTATTTTGGGACGGAGGAGTAT.....                                                                                                        | 1              | 24 |
| .....TTTATTTTGGGACGGAGGAGTA.....                                                                                                         | 2              | 22 |
| .....TATTTTGGGACGGAGGAGG.....                                                                                                            | 1              | 19 |
| .....TTTTGGGACGGAGGAGTAT.....                                                                                                            | 1              | 20 |
| <br>                                                                                                                                     |                |    |
| >osa-miR1876_MIMAT0007831_Oryza_sativa_miR1876                                                                                           |                |    |
| TGAACCCATTATGGCTATTCAAGTGGTAAACATAGTTGGTGCATTAATGGCCTATAAGTGGTGTGGGCTGGCCCTCTGTATCTCTGATAGTTAGTATGTTGTAATAATGAACAAGTACTTTTAAATTTAA       |                |    |
| *****ATAAGTGGTGTGGGCTGGCC*****                                                                                                           | osa-miR1876    | 24 |
| .....ATGGCCTATAAGTGGTGTGG.....                                                                                                           | 1              | 23 |
| .....ATAAGTGGTGTGGGCTGGC.....                                                                                                            | 1              | 22 |
| .....ATAAGTGGTGTGGGCTGGCC.....                                                                                                           | 1              | 23 |
| .....ATAAGTGGTGTGGGCTGGCC.....                                                                                                           | 76             | 24 |



```

.....TAAGTGGTTTGTGGCTGCCCC..... 2 23

>osa-miR1884b_MIMAT0007832_Oryza_sativa_miR1884b
TCATAGCTAGATATAGTACACCTTGGGATGGATGTAGTATTGTACTCCCTCTGTTTAAATGTATGACGCTGTGACTTTAGATATATGTTGACAATCGTCTTATTCAAAAATCGAGCAAAATATAAAAAATAGTGTAG
*****AAATGTATGACGCTGTGACTTTTA..... 24
.....TTAAATGTATGACGCTGTGACTTT..... 1 24
.....AATGTATGACGCTGTGACTTT..... 3 20
.....AATGTATGACGCTGTGACTTTTA..... 17 24
.....ATGTATGACGCTGTGACTTT..... 1 19
.....TTGACTTTTATGATATATGTTGA..... 1 22
.....TGACTTTTATGATATATGTTGAC..... 1 22
.....TGACAATTCGTCTTATTCAAAA..... 1 22

>osa-miR1862e_MIMAT0007833_Oryza_sativa_miR1862e
GTATTTCTTCATCCAAAATGAAAAATCTAGTACATATGTGTTGACATATCTGTACTAGATTGTTTATTTGGGACGGAGGAGTATCCAGTAGTAGCAGCACTGTTGAATCATGAAAAAGTGAATTAATG
*****CTAGATTGTTTATTTGGGACGG***** 24
.....ATCCAAAATGAAAAATCTAGTA..... 5 24
.....TACTAGATTGTTTATTTGGGACG..... 1 25
.....ACTAGATTGTTTATTTGG..... 2 19
.....ACTAGATTGTTTATTTGGG..... 2 21
.....ACTAGATTGTTTATTTGGGA..... 2 22
.....ACTAGATTGTTTATTTGGGACG..... 151 24
.....CTAGATTGTTTATTTGGGA..... 1 21
.....CTAGATTGTTTATTTGGGACG..... 5 23
.....CTAGATTGTTTATTTGGGACGG..... 257 24
.....CTAGATTGTTTATTTGGGACGGA..... 1 25
.....TAGATTGTTTATTTGGGAC..... 2 21
.....TAGATTGTTTATTTGGGACGG..... 55 23
.....TAGATTGTTTATTTGGGACGGA..... 1 24
.....AGATTGTTTATTTGGGA..... 1 19
.....AGATTGTTTATTTGGGACG..... 1 21
.....AGATTGTTTATTTGGGACGG..... 23 22
.....AGATTGTTTATTTGGGACGGA..... 70 22
.....AGATTGTTTATTTGGGACGGAG..... 173 24
.....GATTGTTTATTTGGGACGGA..... 7 22
.....GATTGTTTATTTGGGACGGAG..... 9 23
.....GATTGTTTATTTGGGACGGA..... 2 20
.....TTGTTTATTTGGGACGGAG..... 14 21
.....TTGTTTATTTGGGACGGAGG..... 1 22
.....TTGTTTATTTGGGACGGAGGA..... 1 24
.....TTGTTTATTTGGGACGG..... 1 18
.....TTGTTTATTTGGGACGGAG..... 3 20
.....TTGTTTATTTGGGACGGAGG..... 10 21
.....TTGTTTATTTGGGACGGAGGAGT..... 4 24
.....TTTATTTGGGACGGAGGAGTAT..... 1 24
.....TTTATTTGGGACGGAGGAGTA..... 2 22
.....TTTATTTGGGACGGAGGAG..... 1 19
.....TTTATTTGGGACGGAGGAGTAT..... 1 20
.....AGGAGTATCCAGTAGTAGTAC..... 1 23
.....AGTATCCAGTAGTAGTACGAGCAA..... 1 24

>osa-miR1878_MIMAT0007835_Oryza_sativa_miR1878
TGACTTTTGGTCTTATGCTGCTGCACTGTAATGAGATCTTAAAACTACCACTGCAGACTTAATCTGGACACTATAAAAAAATGTGCATGAAAATGCCATATAAATTTAGTAGTTCAGATTGAGTTAGAA
*****ACTTAATCTGGACACTATAAAAA***** 24
.....ACTTAATCTGGACACTATAAAAA..... 3 23
.....ACTTAATCTGGACACTATAAAAA..... 15 24
.....ACTTAATCTGGACACTATAAAAA..... 1 25
.....CTTAATCTGGACACTATAAAAA..... 4 23
.....TAATCTGGACACTATAAAAA..... 1 21
.....ATTGTTAGTGTTCAGATTGAGTTT..... 2 24

>osa-miR1879_MIMAT0007836_Oryza_sativa_miR1879
TGTTGAGGAATAAACATCTTGTCCCTTGCATCTAACTAGATATCTTCAAGCATATGTTGTTGTTAGGGATGAGTGGATGGTTAGTCCATCCAGATTTTGGGATAGGTTGGTCTTATTTCTGTTTGAAGG
*****GTGTTGGTTAGGGATGAGTGG***** 24
.....GTGTTGGTTAGGGATGAGTGG..... 1 23
.....GTGTTGGTTAGGGATGAGTGG..... 24 24
.....TTGGTTAGGGATGAGTGGATG..... 1 24
.....GTTTAGGGATGAGTGGATGG..... 1 22
.....TTTAGGGATGAGTGGATGG..... 1 21
.....TTAGGGATGAGTGGATGG..... 1 20
.....TTAGGGATGAGTGGATGGG..... 7 21
.....TAGGGATGAGTGGATGGG..... 9 20
.....TAGGGATGAGTGGATGGGT..... 11 21
.....AGGGATGAGTGGATGGGT..... 1 20
.....GATGAGTGGATGGGTAGG..... 1 21

>osa-miR1880_MIMAT0007837_Oryza_sativa_miR1880
CGGTGGAGTATGATTTTCTCAGCGGACACGTAAGTTCGCTTGTGAAAATCGATTTTCCAAGCGGCGCACTTAAGCATCCGCTGAAAATTAAGGATTTTCGACGCGGATCGCTTAAGTGGTCCGCTGGATA
*****TTCCAAGCGGCGCACTTAAGCAT***** 24
.....TTCCAAGCGGCGCACTTAAGC..... 2 21
.....TTCCAAGCGGCGCACTTAAGCAT..... 5 23
.....TTCCAAGCGGCGCACTTAAGCAT..... 2 24
.....TTCCAAGCGGCGCACTTAAGCAT..... 1 20
.....TAAGTGGTCCGCTGGATA.....

>osa-miR1881_MIMAT0007838_Oryza_sativa_miR1881
CGACTGGCAGGAGTCAAGCGCAACCAAGTAAAAATCTAATGATGAACAAGCATCAATGTTATTGAGCGTGGTGGTGTGACCTGTGACGTAAGCTTGAGGACGCAAGTTCAGCTCCTCAAAGGAAGATTGTA
*****AAATGTATTGACGCTGGTGGT***** 24
.....ATCAATGTTATTGAGCGTGGT..... 1 23
.....ATCAATGTTATTGAGCGTGGT..... 1 24
.....CAATGTTATTGAGCGTGGTGGT..... 1 24
.....AATGTTATTGAGCGTGGTGG..... 1 21
.....AATGTTATTGAGCGTGGTGGT..... 1 22
.....AATGTTATTGAGCGTGGTGGT..... 7 23
.....AATGTTATTGAGCGTGGTGGT..... 6 24

>osa-miR1812g_MIMAT0007847_Oryza_sativa_miR1812g
TACTATTATATTTTATCTCATAAACAATAAAAAATCTAATATAAAAAAATTAATAAGCGGATGATTAAGTTGGACATGAAACTCATAGTTGACTTAAAAATGGGACGAGGAGTATCATTGGCAGTTGGTGA
*****AAGCGGATGATTAAGTTGGACA***** 24
.....ATAAAAAAATTAATAAGCGGA..... 1 24
.....AAAAAATTAATAAGCGGATG..... 2 23
.....AAAAAATTAATAAGCGGATGA..... 1 24
.....AAAAAATTAATAAGCGGATGA..... 1 22
.....AAATTAATAAGCGGATGATTA..... 1 24
.....AATTAATAAGCGGATGATTA..... 1 24
.....ATTAATAAGCGGATGATTA..... 1 23

```

|                                   |    |    |
|-----------------------------------|----|----|
| .....ATTTAAATAAGCGGATGATTA.....   | 3  | 24 |
| .....TTAAATAAGCGGATGATTA.....     | 1  | 22 |
| .....AAATAAGCGGATGATTAAG.....     | 2  | 21 |
| .....AAATAAGCGGATGATTAAGTT.....   | 1  | 23 |
| .....AAATAAGCGGATGATTAAGTTG.....  | 1  | 24 |
| .....AAATAAGCGGATGATTAAGTTGG..... | 1  | 25 |
| .....AAATAAGCGGATGATTA.....       | 1  | 19 |
| .....AAATAAGCGGATGATTAAG.....     | 1  | 20 |
| .....AAATAAGCGGATGATTAAGTT.....   | 2  | 21 |
| .....AAATAAGCGGATGATTAAGTTG.....  | 1  | 22 |
| .....AAATAAGCGGATGATTAAGTTGG..... | 48 | 24 |
| .....ATAAGCGGATGATTAAGTTGG.....   | 2  | 23 |
| .....ATAAGCGGATGATTAAGTTGGA.....  | 15 | 24 |
| .....TAAGCGGATGATTAAGTTG.....     | 3  | 21 |
| .....TAAGCGGATGATTAAGTTGG.....    | 1  | 22 |
| .....TAAGCGGATGATTAAGTTGGA.....   | 2  | 23 |
| .....TAAGCGGATGATTAAGTTGGAC.....  | 6  | 24 |
| .....AAAGCGGATGATTAAGTTGGACA..... | 39 | 24 |
| .....AGCGGATGATTAAGTTGGACA.....   | 1  | 23 |

>osa-miR812h\_MIMAT0007848\_Oryza\_sativa\_miR812h

|                                                                                                                                         |             |    |
|-----------------------------------------------------------------------------------------------------------------------------------------|-------------|----|
| GTTTTATTGAACTTTTATAAATGATTTTTATTGTTATGAGATTATAAAATTTAAATAAGCGGATGATTAAGTTGGACAGAAACTCATGGCTACACTTACAATGAAATGGAGGGTACTACTCAGCTCCTGTTACAG | osa-miR812h | 24 |
| *****AAGCGGATGATTAAGTTGGACA*****                                                                                                        |             |    |
| .....ATAAAATTTAAATAAGCGGATG.....                                                                                                        | 1           | 23 |
| .....ATAAAATTTAAATAAGCGGATGA.....                                                                                                       | 7           | 24 |
| .....ATAAAATTTAAATAAGCGGATGA.....                                                                                                       | 1           | 22 |
| .....ATAAAATTTAAATAAGCGGATGATTA.....                                                                                                    | 1           | 24 |
| .....AATTTAAATAAGCGGATGATTA.....                                                                                                        | 1           | 24 |
| .....ATTAAATAAGCGGATGATTA.....                                                                                                          | 1           | 23 |
| .....ATTTAAATAAGCGGATGATTA.....                                                                                                         | 3           | 24 |
| .....TTAAATAAGCGGATGATTA.....                                                                                                           | 1           | 22 |
| .....AAATAAGCGGATGATTAAG.....                                                                                                           | 2           | 21 |
| .....AAATAAGCGGATGATTAAGTT.....                                                                                                         | 1           | 23 |
| .....AAATAAGCGGATGATTAAGTTG.....                                                                                                        | 1           | 24 |
| .....AAATAAGCGGATGATTAAGTTGG.....                                                                                                       | 1           | 25 |
| .....AAATAAGCGGATGATTA.....                                                                                                             | 1           | 19 |
| .....ATAAGCGGATGATTAAG.....                                                                                                             | 1           | 20 |
| .....ATAAGCGGATGATTAAGTT.....                                                                                                           | 2           | 21 |
| .....ATAAGCGGATGATTAAGTTG.....                                                                                                          | 1           | 22 |
| .....ATAAGCGGATGATTAAGTTGG.....                                                                                                         | 48          | 24 |
| .....ATAAGCGGATGATTAAGTTGG.....                                                                                                         | 2           | 23 |
| .....ATAAGCGGATGATTAAGTTGGA.....                                                                                                        | 15          | 24 |
| .....TAAGCGGATGATTAAGTTGG.....                                                                                                          | 3           | 21 |
| .....TAAGCGGATGATTAAGTTGG.....                                                                                                          | 1           | 22 |
| .....TAAGCGGATGATTAAGTTGGA.....                                                                                                         | 2           | 23 |
| .....TAAGCGGATGATTAAGTTGGAC.....                                                                                                        | 6           | 24 |
| .....AAGCGGATGATTAAGTTGGACA.....                                                                                                        | 39          | 24 |
| .....AGCGGATGATTAAGTTGGACA.....                                                                                                         | 1           | 23 |
| .....GACGGATGATTAAGTTGGACAG.....                                                                                                        | 4           | 24 |
| .....ACGGATGATTAAGTTGGACAG.....                                                                                                         | 1           | 23 |
| .....ATGATTAAGTTGGACAG.....                                                                                                             | 1           | 19 |
| .....ATGATTAAGTTGGACAGAA.....                                                                                                           | 1           | 21 |
| .....ATGATTAAGTTGGACAGAAAC.....                                                                                                         | 25          | 24 |
| .....TGATTAAGTTGGACAGAAA.....                                                                                                           | 1           | 21 |
| .....TGATTAAGTTGGACAGAAA.....                                                                                                           | 1           | 22 |
| .....TGATTAAGTTGGACAGAAA.....                                                                                                           | 1           | 23 |
| .....GATTAAGTTGGACAGAA.....                                                                                                             | 1           | 19 |
| .....TTAAAGTTGGACAGAAAC.....                                                                                                            | 2           | 20 |

>osa-miR812i\_MIMAT0007849\_Oryza\_sativa\_miR812i

|                                                                                                                                   |             |    |
|-----------------------------------------------------------------------------------------------------------------------------------|-------------|----|
| AAACATGAATATTACTTTATGATGACTTATATTTAGATTTCTAAAAAAATAAATAAGCGGATGATTAAGTTGGACAGAAACTCAGGGCTCGCTTATTTGGGAATGAGGGAGTACCGGACTAATATCAAC | osa-miR812i | 24 |
| *****AAGCGGATGATTAAGTTGGACA*****                                                                                                  |             |    |
| .....AAAAAATAAATAAGCGGATG.....                                                                                                    | 1           | 24 |
| .....AAATAAATAAGCGGATGATTA.....                                                                                                   | 1           | 24 |
| .....AAATAAAGCGGATGATTAAG.....                                                                                                    | 2           | 21 |
| .....AAATAAAGCGGATGATTAAGTT.....                                                                                                  | 1           | 23 |
| .....AAATAAAGCGGATGATTAAGTTG.....                                                                                                 | 1           | 24 |
| .....AAATAAAGCGGATGATTAAGTTGG.....                                                                                                | 1           | 25 |
| .....AATAAGCGGATGATTA.....                                                                                                        | 1           | 19 |
| .....AATAAGCGGATGATTAAG.....                                                                                                      | 1           | 20 |
| .....AATAAGCGGATGATTAAGTT.....                                                                                                    | 2           | 21 |
| .....AATAAGCGGATGATTAAGTTG.....                                                                                                   | 1           | 22 |
| .....AATAAGCGGATGATTAAGTTGG.....                                                                                                  | 48          | 24 |
| .....ATAAGCGGATGATTAAGTTGG.....                                                                                                   | 2           | 23 |
| .....ATAAGCGGATGATTAAGTTGGA.....                                                                                                  | 15          | 24 |
| .....TAAGCGGATGATTAAGTTGG.....                                                                                                    | 3           | 21 |
| .....TAAGCGGATGATTAAGTTGG.....                                                                                                    | 1           | 22 |
| .....TAAGCGGATGATTAAGTTGGA.....                                                                                                   | 2           | 23 |
| .....TAAGCGGATGATTAAGTTGGAC.....                                                                                                  | 6           | 24 |
| .....AAGCGGATGATTAAGTTGGACA.....                                                                                                  | 39          | 24 |
| .....AGCGGATGATTAAGTTGGACA.....                                                                                                   | 1           | 23 |
| .....GACGGATGATTAAGTTGGACAG.....                                                                                                  | 4           | 24 |
| .....ACGGATGATTAAGTTGGACAG.....                                                                                                   | 1           | 23 |
| .....ATGATTAAGTTGGACAG.....                                                                                                       | 1           | 19 |
| .....ATGATTAAGTTGGACAGAA.....                                                                                                     | 1           | 21 |
| .....ATGATTAAGTTGGACAGAAAC.....                                                                                                   | 25          | 24 |
| .....TGATTAAGTTGGACAGAAA.....                                                                                                     | 1           | 21 |
| .....TGATTAAGTTGGACAGAAA.....                                                                                                     | 1           | 22 |
| .....TGATTAAGTTGGACAGAAA.....                                                                                                     | 1           | 23 |
| .....GATTAAGTTGGACAGAA.....                                                                                                       | 1           | 19 |
| .....TTAAAGTTGGACAGAAAC.....                                                                                                      | 2           | 20 |
| .....AAAGTTGGACAGAAACTCAGGG.....                                                                                                  | 1           | 24 |

>osa-miR812j\_MIMAT0007850\_Oryza\_sativa\_miR812j

|                                                                                                                                    |             |    |
|------------------------------------------------------------------------------------------------------------------------------------|-------------|----|
| ACTATTGATGTTTATAAATTAACAATAAAATACTAATCATACAAAAATTTCAAATAAGCGGATGATTAAGTTGGACAGAAACTCATGGCTCGCTTATTTGTGACGAGAGACTACTTGGAAAGATCAGCTA | osa-miR812j | 24 |
| *****AAGCGGATGATTAAGTTGGACA*****                                                                                                   |             |    |
| .....AATAACAATAAAATACTAATCAT.....                                                                                                  | 2           | 24 |
| .....AAAAATTTCAAATAAGCGGA.....                                                                                                     | 1           | 21 |
| .....AAAAATTTCAAATAAGCGGATG.....                                                                                                   | 1           | 23 |
| .....AAAAATTTCAAATAAGCGGATGA.....                                                                                                  | 5           | 24 |
| .....AAAAATTTCAAATAAGCGGA.....                                                                                                     | 1           | 20 |
| .....AAATTTCAAATAAGCGGATG.....                                                                                                     | 1           | 21 |
| .....AAATTTCAAATAAGCGGATGA.....                                                                                                    | 1           | 22 |
| .....AAATTTCAAATAAGCGGATGATT.....                                                                                                  | 1           | 24 |
| .....AATTTCAAATAAGCGGATGATTA.....                                                                                                  | 1           | 24 |
| .....ATTTCAAATAAGCGGATGATTA.....                                                                                                   | 1           | 24 |
| .....TCAAATAAGCGGATGAT.....                                                                                                        | 1           | 18 |
| .....CAAATAAGCGGATGATTAAG.....                                                                                                     | 1           | 22 |
| .....AAATAAGCGGATGATTAAG.....                                                                                                      | 2           | 21 |

|                                   |    |    |
|-----------------------------------|----|----|
| .....AAATAAGCGGATGATTAAGTT.....   | 1  | 23 |
| .....AAATAAGCGGATGATTAAGTTG.....  | 1  | 24 |
| .....AAATAAGCGGATGATTAAGTTGG..... | 1  | 25 |
| .....AATAAGCGGATGATTAAG.....      | 1  | 19 |
| .....AATAAGCGGATGATTAAG.....      | 1  | 20 |
| .....AATAAGCGGATGATTAAGTT.....    | 2  | 21 |
| .....AATAAGCGGATGATTAAGTT.....    | 1  | 22 |
| .....AATAAGCGGATGATTAAGTTGG.....  | 48 | 24 |
| .....ATAAGCGGATGATTAAGTTGG.....   | 2  | 23 |
| .....ATAAGCGGATGATTAAGTTGGA.....  | 15 | 24 |
| .....TAAGCGGATGATTAAGTTG.....     | 3  | 21 |
| .....TAAGCGGATGATTAAGTTGG.....    | 1  | 22 |
| .....TAAGCGGATGATTAAGTTGGA.....   | 2  | 23 |
| .....TAAGCGGATGATTAAGTTGGAC.....  | 6  | 24 |
| .....AAGCGGATGATTAAGTTGGACA.....  | 39 | 24 |
| .....AGCGGATGATTAAGTTGGACA.....   | 1  | 23 |
| .....GACGGATGATTAAGTTGGACACG..... | 4  | 24 |
| .....ACGGATGATTAAGTTGGACACG.....  | 1  | 23 |
| .....ACGGATGATTAAGTTGGACACGG..... | 4  | 24 |
| .....CGGATGATTAAGTTGGACACGGA..... | 1  | 24 |
| .....GGATGATTAAGTTGGACACGGAA..... | 3  | 24 |
| .....GATGATTAAGTTGGACACGGAA.....  | 1  | 23 |
| .....GATGATTAAGTTGGACACGGAAA..... | 23 | 24 |
| .....ATGATTAAGTTGGACACG.....      | 1  | 19 |
| .....ATGATTAAGTTGGACACGGAAAC..... | 7  | 24 |
| .....TGATTAAGTTGGACACGGAAAC.....  | 1  | 23 |
| .....GATTAAGTTGGACACGGAAAC.....   | 1  | 22 |
| .....ATTAAGTTGGACACGGAA.....      | 1  | 18 |
| .....ATTAAGTTGGACACGGAAAC.....    | 2  | 21 |
| .....ATTAAGTTGGACACGGAAACTCA..... | 1  | 24 |
| .....TTAAAGTTGGACACGGAAA.....     | 1  | 19 |
| .....AAAGTTGGACACGGAAA.....       | 1  | 18 |
| .....AGTTGGACACGGAACTCATGGCT..... | 1  | 24 |
| .....ACGGAACTCATGGCTGCGTTTAT..... | 1  | 24 |
| .....ATTTGTGACGGAGAGAGT.....      | 1  | 19 |

|                                                                                                                          |             |    |
|--------------------------------------------------------------------------------------------------------------------------|-------------|----|
| >osa-miR1318_MIMAT0009135_Oryza_sativa_miR1318                                                                           |             |    |
| TCTGAGCTCTGACAGATGAGGAGGATGTGCTTCTTGGGGGTTGGCCCTGTGATCAGGAGAGTACACGACATCGCCGAATTCCTTGGTCTGTGTCATGATGAATGATGGCTTTGATGCAAG |             |    |
| .....*TCAGGAGAGTACACCGAC*.....                                                                                           | osa-miR1318 | 20 |
| .....CTGTGATCAGGAGAGTACAC.....                                                                                           | 2           | 21 |
| .....TGATCAGGAGAGTACAC.....                                                                                              | 3           | 21 |
| .....GATCAGGAGAGTACACCGA.....                                                                                            | 32          | 21 |
| .....GATCAGGAGAGTACACCGAC.....                                                                                           | 6           | 22 |
| .....GATCAGGAGAGTACACGACA.....                                                                                           | 33          | 23 |
| .....ATCAGGAGAGTACACCC.....                                                                                              | 16          | 18 |
| .....ATCAGGAGAGTACACCG.....                                                                                              | 14          | 19 |
| .....ATCAGGAGAGTACACCGA.....                                                                                             | 99          | 20 |
| .....ATCAGGAGAGTACACCGAC.....                                                                                            | 9315        | 21 |
| .....ATCAGGAGAGTACACCGACA.....                                                                                           | 39380       | 22 |
| .....ATCAGGAGAGTACACCGACAT.....                                                                                          | 201         | 23 |
| .....ATCAGGAGAGTACACCGACATC.....                                                                                         | 16          | 24 |
| .....TCAGGAGAGTACACCG.....                                                                                               | 9           | 18 |
| .....TCAGGAGAGTACACCGA.....                                                                                              | 236         | 19 |
| .....TCAGGAGAGTACACCGAC.....                                                                                             | 7005        | 20 |
| .....TCAGGAGAGTACACCGACA.....                                                                                            | 3681        | 21 |
| .....TCAGGAGAGTACACCGACAT.....                                                                                           | 13          | 22 |
| .....TCAGGAGAGTACACCGACATCG.....                                                                                         | 1           | 24 |
| .....CAGGAGAGTACACCGA.....                                                                                               | 2           | 18 |
| .....CAGGAGAGTACACCGAC.....                                                                                              | 102         | 19 |
| .....CAGGAGAGTACACCGACA.....                                                                                             | 56          | 20 |
| .....CAGGAGAGTACACCGACAT.....                                                                                            | 1           | 21 |
| .....AGGAGAGTACACCGAC.....                                                                                               | 206         | 18 |
| .....AGGAGAGTACACCGACA.....                                                                                              | 274         | 19 |
| .....AGGAGAGTACACCGACAT.....                                                                                             | 1           | 20 |
| .....GAGATGACACGACATCGCCG.....                                                                                           | 4           | 21 |
| .....GAGATGACACGACATCGCCGAA.....                                                                                         | 1           | 24 |
| .....AGATGACACGACATCGCCGG.....                                                                                           | 1           | 21 |
| .....GATGACACGACATCGCCGG.....                                                                                            | 1           | 20 |
| .....GAATTGATGTCGTTGATG.....                                                                                             | 1           | 21 |

|                                                                                                                                       |             |    |
|---------------------------------------------------------------------------------------------------------------------------------------|-------------|----|
| >osa-miR1319_MIMAT0009136_Oryza_sativa_miR1319                                                                                        |             |    |
| TAGGTGTGGTTCTAAAGAAAAATCGACACTTATACTATGGGTGTCGGTTTTAAGAAAAACCGGCATCTGTAATATTATAGGTGTCGGTAAATAAAAACCGAGACCTATAATATATAAGTCCCGTTTTTTAAAA |             |    |
| .....*AACCGGCATCTGTAATATTATA*.....                                                                                                    | osa-miR1319 | 24 |
| .....AAGAAAAACCGGCATCTGTAATA.....                                                                                                     | 1           | 24 |
| .....AAAAACCGGCATCTGTAAT.....                                                                                                         | 1           | 20 |
| .....CTGTAATATTATAGGTGTCGGT.....                                                                                                      | 1           | 24 |
| .....TAATATATTATAGGTGTCGGTTAA.....                                                                                                    | 2           | 24 |
| .....AATATATTATAGGTGTCGGTT.....                                                                                                       | 1           | 21 |
| .....AATATATTATAGGTGTCGGTTAAT.....                                                                                                    | 1           | 24 |
| .....ATATTATAGGTGTCGGTTAAT.....                                                                                                       | 1           | 21 |
| .....ATATTATAGGTGTCGGTTAATTA.....                                                                                                     | 3           | 24 |
| .....ATTATAGGTGTCGGTTAATTAATA.....                                                                                                    | 3           | 24 |
| .....TTATAGGTGTCGGTTAATTA.....                                                                                                        | 1           | 21 |

|                                                                                                                                 |             |    |
|---------------------------------------------------------------------------------------------------------------------------------|-------------|----|
| >osa-miR1320_MIMAT0009137_Oryza_sativa_miR1320                                                                                  |             |    |
| CCGTTTTCGATGCCCGCGCTTTCAITTCCTCTTAAGATCAAGTTAGCCCTACTTGGACGGAGAAATTTATAGGATTTTGGCGGAATTTACAGATTCCTGAAAATTCATTCGTTCAATGTAGCCCTAT |             |    |
| .....*TGGACGGAGAAATTTATAG*.....                                                                                                 | osa-miR1320 | 21 |
| .....GTTAGCCCTACTTGGACCG.....                                                                                                   | 1           | 21 |
| .....GCCTACTTGGACGGAGAA.....                                                                                                    | 3           | 21 |
| .....ACTTGGACGGAGAAATTT.....                                                                                                    | 1           | 21 |
| .....ACTTGGACGGAGAAATTTATA.....                                                                                                 | 1           | 24 |
| .....TGGACGGAGAAATTTA.....                                                                                                      | 4           | 18 |
| .....TGGACGGAGAAATTTAT.....                                                                                                     | 10          | 19 |
| .....TGGACGGAGAAATTTATA.....                                                                                                    | 15          | 20 |
| .....TGGACGGAGAAATTTATAG.....                                                                                                   | 433         | 21 |
| .....TGGACGGAGAAATTTATAGG.....                                                                                                  | 206         | 22 |
| .....TGGACGGAGAAATTTATAGGA.....                                                                                                 | 4           | 23 |
| .....TGGACGGAGAAATTTATAGGAT.....                                                                                                | 3           | 24 |
| .....GGAACGGAGAAATTTATAG.....                                                                                                   | 2           | 20 |
| .....GGAACGGAGAAATTTATAGG.....                                                                                                  | 52          | 21 |
| .....GGAACGGAGAAATTTATAGG.....                                                                                                  | 2           | 20 |
| .....GGAACGGAGAAATTTATAGGA.....                                                                                                 | 3           | 21 |
| .....AACGGAGAAATTTATAG.....                                                                                                     | 1           | 18 |
| .....ATTCCTGAAAATTCATTCGT.....                                                                                                  | 2           | 21 |
| .....TGTAATAATTCATTCGTTCC.....                                                                                                  | 1           | 18 |
| .....TGTAATAATTCATTCGTTCC.....                                                                                                  | 2           | 19 |
| .....TGTAATAATTCATTCGTTCCA.....                                                                                                 | 1           | 20 |
| .....TGTAATAATTCATTCGTTCCAA.....                                                                                                | 51          | 21 |
| .....TGTAATAATTCATTCGTTCCAAT.....                                                                                               | 1           | 22 |

```

.....GTAAMATTCATTGTTCCAA..... 2 20
.....GTAAMATTCATTGTTCCAAT..... 5 21
.....TAAAMATTCATTGTTCCAAT..... 1 20

```

```

>osa-miR1846e_MIMAT0010042_Oryza_sativa_miR1846e
TGCCGTGCGCCGATCGTTGTCTGCGGGTCCGATCTCTGCACTCGCGCCGATCCGCAACGAGGAGGCGGGACACCCGGATCCGGTACTCGGCTCTCCGCGGAGATCCGGCCACTCTGAGGCAGGGGGT
*****CAACGAGGAGCCGGGACCA*****
.....ATCCGCCAACGAGGAGCCGG..... 1 21
.....AACGAGGAGCCGGGACCC..... 1 18
.....AACGAGGAGCCGGGACCA..... 5 19
.....AACGAGGAGCCGGGACCA..... 7 20
.....AACGAGGAGCCGGGACCA..... 6 21
.....AACGAGGAGCCGGGACCCG..... 199 22
.....AACGAGGAGCCGGGACCCGG..... 38 23
.....ACGAGGAGCCGGGACCA..... 3 19
.....ACGAGGAGCCGGGACCA..... 1 20
.....ACGAGGAGCCGGGACCCG..... 59 21
.....ACGAGGAGCCGGGACCCGG..... 4 22
.....ACGAGGAGCCGGGACCCGGA..... 2 23
.....CGAGGAGCCGGGACCCGG..... 3 20
.....GAGGAGCCGGGACCCG..... 1 19
.....AGGAGCCGGGACCCG..... 1 18
.....CGGTACTCCGGCTCTCCG..... 1 22
.....AGATCCGGCCACTCTGAGGCAG..... 1 23

```

```

>osa-miR2098-3p_MIMAT0010061_Oryza_sativa_miR2098-3p
CGGCACATCAACCAACTCGTCTGTGTCATCCCGTGGAGGACCGGATGAGGATTAACGGTTTGTCAAGCGGAGTCACTTAATGAGGCCAAGTAGGAGTCTCACAGCTCCGCGAGCTCCCTGTCGGT
*****CGGTTTGTCAAGCGGAGTG*****
.....GAGGATTAACGGTTTGTCAAGCGG..... 1 24

```

```

>osa-miR2121a_MIMAT0011180_Oryza_sativa_miR2121a
CAGCGCGGCTTAGGCTGTGTTCCATCTACAGATGGAACTATTCCCTCGACGAAAACGGAGCGTCCATTAGCGGTGATTAATAGTATTAGTAATTTTTTAAAAAGGATTAATGTGATATTTTAAAG
*****AAAAAGGAGCGTCCATTAGCGCG*****
.....TGACGAAAACGGAGCGTCCAT..... 6 24
.....GCACGAAAACGGAGCGTCCATT..... 1 24
.....CACGAAAACGGAGCGGT..... 1 18
.....CACGAAAACGGAGCGTCCATT..... 2 23
.....CACGAAAACGGAGCGTCCATT..... 1 24
.....ACGAAAACGGAGCGTCCA..... 1 20
.....ACGAAAACGGAGCGTCCAT..... 8 21
.....ACGAAAACGGAGCGTCCATT..... 5 22
.....ACGAAAACGGAGCGTCCATT..... 5 23
.....ACGAAAACGGAGCGTCCATTAG..... 5 24
.....CGAAAACGGAGCGTCCAT..... 1 20
.....CGAAAACGGAGCGTCCATTAGC..... 1 24
.....GAAAACGGAGCGTCCATTAGC..... 1 23
.....GAAAACGGAGCGTCCATTAGCGC..... 5 24
.....AAAACGGAGCGTCCATTAGCG..... 1 22
.....AAAACGGAGCGTCCATTAGCGC..... 4 23
.....AAAACGGAGCGTCCATTAGCGCG..... 14 24
.....AAAACGGAGCGTCCATTAGCGCG..... 1 23
.....ACGGAGCGTCCATTAGCGCGTGA..... 1 24
.....AGGGTCCATTAGCGCGTGAATAA..... 2 24
.....ATTAGCGCGTGAATAAATAGTAT..... 1 24
.....AGCGCGTGAATAAATAGTATTA..... 1 23
.....ATTTTTTTTTAAAAATGATTA..... 1 23

```

```

>osa-miR2121b_MIMAT0011181_Oryza_sativa_miR2121b
AGGATGTGTGTGAGATGCATTTATGTGCTGGAACTATCCCTCGACGAAAACGGAGCGTCCATTAGCGGTGATTAATAGTATTAGATATTTTTTAAAAAGCACTTAATATAGAACTTTTGA
*****AAAAAGGAGCGTCCATTAGCGCG*****
.....GCACGAAAACGGAGCGTCCATT..... 1 24
.....CACGAAAACGGAGCGGT..... 1 18
.....CACGAAAACGGAGCGTCCATT..... 2 23
.....CACGAAAACGGAGCGTCCATT..... 1 24
.....ACGAAAACGGAGCGTCCA..... 1 20
.....ACGAAAACGGAGCGTCCAT..... 8 21
.....ACGAAAACGGAGCGTCCATT..... 5 22
.....ACGAAAACGGAGCGTCCATT..... 5 23
.....ACGAAAACGGAGCGTCCATTAG..... 5 24
.....CGAAAACGGAGCGTCCAT..... 1 20
.....CGAAAACGGAGCGTCCATTAGC..... 1 24
.....GAAAACGGAGCGTCCATTAGC..... 1 23
.....GAAAACGGAGCGTCCATTAGCGC..... 5 24
.....AAAACGGAGCGTCCATTAGCG..... 1 22
.....AAAACGGAGCGTCCATTAGCGC..... 4 23
.....AAAACGGAGCGTCCATTAGCGCG..... 14 24
.....AAAACGGAGCGTCCATTAGCGCG..... 1 23
.....ACGGAGCGTCCATTAGCGCGTGA..... 1 24
.....AGGGTCCATTAGCGCGTGAATAA..... 2 24
.....ATTAGCGCGTGAATAAATAGTAT..... 1 24
.....AGCGCGTGAATAAATAGTATTA..... 1 23

```

```

>osa-miR2123a_MIMAT0011183_Oryza_sativa_miR2123a
GTATTTTCACTGACACATCTAGTTTACATATTACAGAGCAAGCGTCAAGATGTACTAAAAAGTCAACGGTGTCAAACTTTTGAACGAGGAGTATATCGTCTGACGCGGATCGTGCATATGGATTTTA
*****AAAAAGTCAACGGTGTCAAACTTTTGAACGAGGAGTATATCGTCTGACGCGGATCGTGCATATGGATTTTA*****
.....AGACATGTACTAAAAAGTCAACGG..... 2 24
.....ACATGTACTAAAAAGTCAACGGT..... 1 24
.....TGACTAAAAAGTCAACGG..... 1 18
.....TGACTAAAAAGTCAACGGTGT..... 1 23
.....GTACTAAAAAGTCAACGGTGT..... 1 21
.....TACTAAAAAGTCAACGGTGT..... 1 20
.....TACTAAAAAGTCAACGGTGT..... 4 21
.....TACTAAAAAGTCAACGGTGTCA..... 1 22
.....ACTAAAAAGTCAACGGTGTCA..... 1 20
.....ACTAAAAAGTCAACGGTGTCA..... 3 21
.....ACTAAAAAGTCAACGGTGTCAA..... 5 22
.....ACTAAAAAGTCAACGGTGTCAAAC..... 30 24
.....CTAAAAAGTCAACGGTGTCAA..... 5 21
.....CTAAAAAGTCAACGGTGTCAA..... 2 22
.....TAAAAAGTCAACGGTGTCAA..... 7 21
.....TAAAAAGTCAACGGTGTCAAACAT..... 8 24
.....AAAAAGTCAACGGTGTCAA..... 1 20
.....AAAAAGTCAACGGTGTCAAAC..... 3 21
.....AAAAAGTCAACGGTGTCAAACA..... 5 22
.....AAAAAGTCAACGGTGTCAAACAT..... 7 23
.....AAAAAGTCAACGGTGTCAAACATT..... 120 24
.....AAAAAGTCAACGGTGTCAAAC..... 1 20

```

|                                    |    |    |
|------------------------------------|----|----|
| .....AAAAGTCAACGGTGTCAAAACA.....   | 4  | 21 |
| .....AAAAGTCAACGGTGTCAAAACATT..... | 4  | 23 |
| .....AAAAGTCAACGGTGTCAAAACATT..... | 22 | 24 |
| .....AAAAGTCAACGGTGTCAAAAC.....    | 1  | 18 |
| .....AAAAGTCAACGGTGTCAAAAC.....    | 2  | 19 |
| .....AAAAGTCAACGGTGTCAAAACA.....   | 2  | 20 |
| .....AAAAGTCAACGGTGTCAAAACAT.....  | 8  | 21 |
| .....AAAAGTCAACGGTGTCAAAACATT..... | 4  | 22 |
| .....AAAAGTCAACGGTGTCAAAACATT..... | 14 | 23 |
| .....AAAAGTCAACGGTGTCAAAACATT..... | 4  | 24 |
| .....AAGTCAACGGTGTCAAAACATT.....   | 3  | 20 |
| .....AAGTCAACGGTGTCAAAACATT.....   | 8  | 21 |
| .....AAGTCAACGGTGTCAAAACATT.....   | 1  | 22 |
| .....AAGTCAACGGTGTCAAAACATT.....   | 3  | 23 |
| .....AAGTCAACGGTGTCAAAACATT.....   | 1  | 24 |
| .....AAGTCAACGGTGTCAAAACATT.....   | 3  | 24 |
| .....AAGTCAACGGTGTCAAAACATT.....   | 1  | 26 |
| .....AAGTCAACGGTGTCAAAACATT.....   | 6  | 24 |
| .....AAGTCAACGGTGTCAAAACATT.....   | 2  | 21 |
| .....AAGTCAACGGTGTCAAAACATT.....   | 1  | 22 |
| .....AAGTCAACGGTGTCAAAACATT.....   | 2  | 21 |
| .....AAGTCAACGGTGTCAAAACATT.....   | 1  | 22 |
| .....AAGTCAACGGTGTCAAAACATT.....   | 5  | 24 |
| .....AAGTCAACGGTGTCAAAACATT.....   | 5  | 24 |
| .....AAGTCAACGGTGTCAAAACATT.....   | 15 | 24 |
| .....AAGTCAACGGTGTCAAAACATT.....   | 1  | 24 |
| .....AAGTCAACGGTGTCAAAACATT.....   | 6  | 21 |
| .....AAGTCAACGGTGTCAAAACATT.....   | 2  | 24 |
| .....AAGTCAACGGTGTCAAAACATT.....   | 1  | 21 |
| .....AAGTCAACGGTGTCAAAACATT.....   | 1  | 24 |
| .....AAGTCAACGGTGTCAAAACATT.....   | 9  | 24 |
| .....AAGTCAACGGTGTCAAAACATT.....   | 17 | 21 |
| .....AAGTCAACGGTGTCAAAACATT.....   | 1  | 24 |
| .....AAGTCAACGGTGTCAAAACATT.....   | 1  | 22 |
| .....AAGTCAACGGTGTCAAAACATT.....   | 5  | 23 |
| .....AAGTCAACGGTGTCAAAACATT.....   | 4  | 24 |
| .....AAGTCAACGGTGTCAAAACATT.....   | 2  | 19 |
| .....AAGTCAACGGTGTCAAAACATT.....   | 6  | 21 |
| .....AAGTCAACGGTGTCAAAACATT.....   | 3  | 24 |
| .....AAGTCAACGGTGTCAAAACATT.....   | 1  | 19 |
| .....AAGTCAACGGTGTCAAAACATT.....   | 1  | 21 |
| .....AAGTCAACGGTGTCAAAACATT.....   | 2  | 23 |
| .....AAGTCAACGGTGTCAAAACATT.....   | 1  | 24 |
| .....AAGTCAACGGTGTCAAAACATT.....   | 1  | 22 |
| .....AAGTCAACGGTGTCAAAACATT.....   | 2  | 23 |
| .....AAGTCAACGGTGTCAAAACATT.....   | 1  | 24 |
| .....AAGTCAACGGTGTCAAAACATT.....   | 1  | 21 |
| .....AAGTCAACGGTGTCAAAACATT.....   | 1  | 18 |
| .....AAGTCAACGGTGTCAAAACATT.....   | 3  | 21 |

>osa-miR2123b\_MIMAT0011184\_Oryza\_sativa\_miR2123b  
TATGAAAAGAAATAAATAATCTTAAATTTTTGAATAAGACGAATGGTCAAAACAGTCTAAAAAGTCAACGGTGTCAAAACATTGTAACGGAGGAGTAGCATGATAGCAAGCAACAGTAGCTCACCAGCGAA  
.....TAAAAAGTCAACGGTGTCAAAAC.....

|                                      |     |    |
|--------------------------------------|-----|----|
| .....ATAATTAATCTTAAATTTTTGAATA.....  | 1   | 24 |
| .....TACTTAAATTTTTGAATAAGA.....      | 1   | 22 |
| .....TACTTAAATTTTTGAATAAGACG.....    | 1   | 24 |
| .....ACTTAAATTTTTGAATAAGACGA.....    | 9   | 24 |
| .....CTTAAATTTTTGAATAAGACGA.....     | 1   | 23 |
| .....TTAAATTTTTGAATAAGACGAA.....     | 1   | 23 |
| .....TTAAATTTTTGAATAAGACGAAT.....    | 1   | 24 |
| .....TAAATTTTTGAATAAGACGA.....       | 9   | 21 |
| .....TAAATTTTTGAATAAGACGA.....       | 5   | 22 |
| .....TAAATTTTTGAATAAGACGAAT.....     | 17  | 23 |
| .....TAAATTTTTGAATAAGACGAATG.....    | 3   | 24 |
| .....AAATTTTTGAATAAGACGA.....        | 1   | 20 |
| .....AAATTTTTGAATAAGACGAA.....       | 3   | 21 |
| .....AAATTTTTGAATAAGACGAAT.....      | 1   | 22 |
| .....AAATTTTTGAATAAGACGAATG.....     | 23  | 23 |
| .....AAATTTTTGAATAAGACGAATGG.....    | 103 | 24 |
| .....AAATTTTTGAATAAGACGAATGGT.....   | 2   | 25 |
| .....AAATTTTTGAATAAGACGAA.....       | 1   | 20 |
| .....AAATTTTTGAATAAGACGAATG.....     | 1   | 22 |
| .....AAATTTTTGAATAAGACGAATGG.....    | 9   | 23 |
| .....AAATTTTTGAATAAGACGAATGGT.....   | 9   | 24 |
| .....AAATTTTTGAATAAGACGAATGGTC.....  | 1   | 25 |
| .....AATTTTTGAATAAGACGAATG.....      | 1   | 21 |
| .....AATTTTTGAATAAGACGAATGGT.....    | 1   | 23 |
| .....TTTTTGAATAAGACGAAT.....         | 1   | 18 |
| .....TTTTTGAATAAGACGAATG.....        | 2   | 19 |
| .....TTTTTGAATAAGACGAATGG.....       | 3   | 20 |
| .....TTTTTGAATAAGACGAATGGT.....      | 13  | 21 |
| .....TTTTTGAATAAGACGAATGGTCAA.....   | 5   | 24 |
| .....TTTTTGAATAAGACGAATGG.....       | 1   | 19 |
| .....TTTTTGAATAAGACGAATGGT.....      | 1   | 20 |
| .....TTTTTGAATAAGACGAATGGTCAA.....   | 2   | 23 |
| .....TTTTTGAATAAGACGAATGGTCAA.....   | 2   | 24 |
| .....TTTTTGAATAAGACGAATGGTCA.....    | 1   | 20 |
| .....TTTTTGAATAAGACGAATGGTCA.....    | 48  | 21 |
| .....TTTTTGAATAAGACGAATGGTCAA.....   | 4   | 22 |
| .....TTTTTGAATAAGACGAATGGTCAA.....   | 1   | 23 |
| .....TTTTTGAATAAGACGAATGGTCAAAC..... | 4   | 24 |
| .....TTGAATAAGACGAATGGT.....         | 1   | 18 |
| .....TTGAATAAGACGAATGGTCA.....       | 1   | 20 |
| .....TTGAATAAGACGAATGGTCAA.....      | 10  | 21 |
| .....TTGAATAAGACGAATGGTCAA.....      | 2   | 22 |
| .....TTGAATAAGACGAATGGTCAAACA.....   | 8   | 24 |
| .....TGAATAAGACGAATGGTCAA.....       | 1   | 21 |
| .....TGAATAAGACGAATGGTCAAACA.....    | 9   | 23 |
| .....TGAATAAGACGAATGGTCAAACAC.....   | 8   | 24 |
| .....AATAAGACGAATGGTCAA.....         | 1   | 19 |
| .....AATAAGACGAATGGTCAAACA.....      | 28  | 21 |
| .....ATAAGACGAATGGTCAA.....          | 1   | 18 |
| .....ATAAGACGAATGGTCAAACA.....       | 13  | 20 |
| .....ATAAGACGAATGGTCAAACAC.....      | 1   | 21 |
| .....ATAAGACGAATGGTCAAACACG.....     | 1   | 22 |
| .....TAAGACGAATGGTCAAACA.....        | 1   | 19 |
| .....ATGGTCAAACAGTCTCTAA.....        | 1   | 20 |
| .....AAACAGTCTCTAAAAAGTCAACGG.....   | 2   | 24 |
| .....AACAGTCTCTAAAAAGTCAACGGT.....   | 1   | 24 |
| .....ACAGTCTCTAAAAAGTCAACGGT.....    | 1   | 21 |
| .....CTAAAAAGTCAACGGTGTCAAA.....     | 5   | 24 |

|                                  |     |    |
|----------------------------------|-----|----|
| .....CTAAAAAGTCAACGGTGTCAAA..... | 2   | 22 |
| .....TAAAAAGTCAACGGTGTCAAA.....  | 7   | 21 |
| .....TAAAAAGTCAACGGTGTCAAA.....  | 8   | 24 |
| .....AAAAAGTCAACGGTGTCAAA.....   | 1   | 20 |
| .....AAAAAGTCAACGGTGTCAAA.....   | 3   | 21 |
| .....AAAAAGTCAACGGTGTCAAA.....   | 5   | 22 |
| .....AAAAAGTCAACGGTGTCAAA.....   | 7   | 23 |
| .....AAAAAGTCAACGGTGTCAAA.....   | 120 | 24 |
| .....AAAAAGTCAACGGTGTCAAA.....   | 1   | 20 |
| .....AAAAAGTCAACGGTGTCAAA.....   | 4   | 21 |
| .....AAAAAGTCAACGGTGTCAAA.....   | 4   | 23 |
| .....AAAAAGTCAACGGTGTCAAA.....   | 22  | 24 |
| .....AAAAAGTCAACGGTGTCAAA.....   | 1   | 18 |
| .....AAAAAGTCAACGGTGTCAAA.....   | 2   | 19 |
| .....AAAAAGTCAACGGTGTCAAA.....   | 2   | 20 |
| .....AAAAAGTCAACGGTGTCAAA.....   | 8   | 21 |
| .....AAAAAGTCAACGGTGTCAAA.....   | 4   | 22 |
| .....AAAAAGTCAACGGTGTCAAA.....   | 14  | 23 |
| .....AAAAAGTCAACGGTGTCAAA.....   | 4   | 24 |
| .....AAAAAGTCAACGGTGTCAAA.....   | 3   | 20 |
| .....AAAAAGTCAACGGTGTCAAA.....   | 8   | 21 |
| .....AAAAAGTCAACGGTGTCAAA.....   | 1   | 22 |
| .....AAAAAGTCAACGGTGTCAAA.....   | 3   | 23 |
| .....AAAAAGTCAACGGTGTCAAA.....   | 1   | 18 |
| .....AAAAAGTCAACGGTGTCAAA.....   | 1   | 24 |

>osa-miR2123c\_MIMAT0011185\_Oryza\_sativa\_miR2123c  
TTGACACTGTTGACTTTTAGCACATGTTGACCATTCGCTTATTAAAAAACACGCTACTAAAAAGTCAACGGTGTCAAACTTTTGAACGGAGGATATAAGTTTGGATATCATTGAACACCTCAAAAAATTC

|                                   |              |    |
|-----------------------------------|--------------|----|
| .....TAAAAAGTCAACGGTGTCAAA.....   | osa-miR2123c | 22 |
| .....GACACTGTTGACTTTTAGCACAT..... | 1            | 24 |
| .....ACACTGTTGACTTTTAGCACATG..... | 1            | 24 |
| .....GTTGACTTTTAGCACATGTTG.....   | 1            | 23 |
| .....GTTGACTTTTAGCACATGTTGA.....  | 5            | 24 |
| .....TTGACTTTTAGCACATGTT.....     | 2            | 19 |
| .....TTGACTTTTAGCACATGTT.....     | 2            | 20 |
| .....TTGACTTTTAGCACATGTT.....     | 7            | 21 |
| .....TTGACTTTTAGCACATGTTG.....    | 1            | 22 |
| .....TTGACTTTTAGCACATGTTGA.....   | 5            | 23 |
| .....TTGACTTTTAGCACATGTTGAC.....  | 19           | 24 |
| .....TGACTTTTAGCACATGTT.....      | 1            | 18 |
| .....TGACTTTTAGCACATGTT.....      | 1            | 20 |
| .....TGACTTTTAGCACATGTTG.....     | 1            | 21 |
| .....TGACTTTTAGCACATGTTGA.....    | 2            | 22 |
| .....TGACTTTTAGCACATGTTGAC.....   | 28           | 23 |
| .....TGACTTTTAGCACATGTTGACC.....  | 10           | 24 |
| .....GACTTTTAGCACATGTTG.....      | 1            | 20 |
| .....GACTTTTAGCACATGTTGA.....     | 1            | 21 |
| .....GACTTTTAGCACATGTTGAC.....    | 9            | 22 |
| .....GACTTTTAGCACATGTTGACCA.....  | 1            | 24 |
| .....ACTTTTAGCACATGTTGAC.....     | 2            | 21 |
| .....ACTTTTAGCACATGTTGACC.....    | 1            | 22 |
| .....TTTTTAGCACATGTTGAC.....      | 1            | 19 |
| .....TTTTTAGCACATGTTGACCTTC.....  | 1            | 24 |
| .....CACATGTTGACCATTCGCTTAT.....  | 1            | 24 |
| .....ACATGTTGACCATTCGCTTAT.....   | 2            | 21 |
| .....ATGTTGACCATTCGCTTAT.....     | 3            | 21 |
| .....ATGTTGACCATTCGCTTAT.....     | 1            | 22 |
| .....ATGTTGACCATTCGCTTATTA.....   | 1            | 24 |
| .....TGTGTTGACCATTCGCTTAT.....    | 2            | 21 |
| .....TGTGTTGACCATTCGCTTATTA.....  | 1            | 23 |
| .....TGTGTTGACCATTCGCTTATTA.....  | 3            | 24 |
| .....AACAGTACTAAAAAGTCAACGG.....  | 1            | 22 |
| .....AACAGTACTAAAAAGTCAACGG.....  | 15           | 24 |
| .....AACAGTACTAAAAAGTCAACGG.....  | 2            | 22 |
| .....AACAGTACTAAAAAGTCAACGG.....  | 2            | 24 |
| .....AACAGTACTAAAAAGTCAACGG.....  | 1            | 24 |
| .....AACAGTACTAAAAAGTCAACGG.....  | 1            | 22 |
| .....AACAGTACTAAAAAGTCAACGG.....  | 1            | 24 |
| .....AACAGTACTAAAAAGTCAACGG.....  | 1            | 21 |
| .....TACTAAAAAGTCAACGGTGT.....    | 1            | 20 |
| .....TACTAAAAAGTCAACGGTGT.....    | 4            | 21 |
| .....TACTAAAAAGTCAACGGTGTCA.....  | 1            | 22 |
| .....ACTAAAAAGTCAACGGTGTCA.....   | 1            | 20 |
| .....ACTAAAAAGTCAACGGTGTCA.....   | 3            | 21 |
| .....ACTAAAAAGTCAACGGTGTCAA.....  | 5            | 22 |
| .....ACTAAAAAGTCAACGGTGTCAA.....  | 30           | 24 |
| .....CTAAAAAGTCAACGGTGTCAA.....   | 5            | 21 |
| .....CTAAAAAGTCAACGGTGTCAA.....   | 2            | 22 |
| .....TAAAAAGTCAACGGTGTCAA.....    | 7            | 21 |
| .....TAAAAAGTCAACGGTGTCAA.....    | 8            | 24 |
| .....AAAAAGTCAACGGTGTCAA.....     | 1            | 20 |
| .....AAAAAGTCAACGGTGTCAA.....     | 3            | 21 |
| .....AAAAAGTCAACGGTGTCAA.....     | 5            | 22 |
| .....AAAAAGTCAACGGTGTCAA.....     | 7            | 23 |
| .....AAAAAGTCAACGGTGTCAA.....     | 7            | 22 |
| .....AAAAAGTCAACGGTGTCAA.....     | 120          | 24 |
| .....AAAAAGTCAACGGTGTCAA.....     | 1            | 20 |
| .....AAAAAGTCAACGGTGTCAA.....     | 4            | 21 |
| .....AAAAAGTCAACGGTGTCAA.....     | 4            | 23 |
| .....AAAAAGTCAACGGTGTCAA.....     | 4            | 24 |
| .....AAAAAGTCAACGGTGTCAA.....     | 22           | 24 |
| .....AAAAAGTCAACGGTGTCAA.....     | 1            | 18 |
| .....AAAAAGTCAACGGTGTCAA.....     | 2            | 19 |
| .....AAAAAGTCAACGGTGTCAA.....     | 2            | 20 |
| .....AAAAAGTCAACGGTGTCAA.....     | 8            | 21 |
| .....AAAAAGTCAACGGTGTCAA.....     | 4            | 22 |
| .....AAAAAGTCAACGGTGTCAA.....     | 14           | 23 |
| .....AAAAAGTCAACGGTGTCAA.....     | 4            | 24 |
| .....AAAAAGTCAACGGTGTCAA.....     | 3            | 20 |
| .....AAAAAGTCAACGGTGTCAA.....     | 8            | 21 |
| .....AAAAAGTCAACGGTGTCAA.....     | 1            | 22 |
| .....AAAAAGTCAACGGTGTCAA.....     | 3            | 23 |
| .....AAAAAGTCAACGGTGTCAA.....     | 1            | 24 |
| .....AGTCAACGGTGTCAA.....         | 3            | 24 |
| .....AGTCAACGGTGTCAA.....         | 1            | 26 |
| .....GTCAACGGTGTCAA.....          | 6            | 24 |
| .....TCAACGGTGTCAA.....           | 2            | 21 |
| .....CAACGGTGTCAA.....            | 1            | 22 |
| .....AACGGTGTCAA.....             | 2            | 21 |
| .....AACGGTGTCAA.....             | 1            | 22 |
| .....AACGGTGTCAA.....             | 5            | 24 |
| .....ACGGTGTCAA.....              | 5            | 24 |
| .....GGTGTCAA.....                | 15           | 24 |

```

.....GTGCAAACTTTTGAACGGAGG..... 1 24
.....TGCAAACTTTTGAACGGA..... 6 21
.....TGCAAACTTTTGAACGGAGG..... 2 24
.....GTCAAACTTTTGAACGGAG..... 1 21
.....GTCAAACTTTTGAACGGAGG..... 1 23
.....GTCAAACTTTTGAACGGAGGA..... 9 24
.....TCAAACTTTTGAACGGAGG..... 17 21
.....TCAAACTTTTGAACGGAGGAG..... 1 24
.....CAAACTTTTGAACGGAGGA..... 1 22
.....CAAACTTTTGAACGGAGGAG..... 5 23
.....CAAACTTTTGAACGGAGGAGT..... 4 24
.....AAACTTTTGAACGGAGG..... 2 19
.....AAACTTTTGAACGGAGGA..... 6 21
.....AAACTTTTGAACGGAGGAGTA..... 3 24
.....AACATTTTGAACGGAGG..... 1 19
.....AACATTTTGAACGGAGGAG..... 1 21
.....AACATTTTGAACGGAGGAGTA..... 2 23
.....AACATTTTGAACGGAGGAGTAT..... 1 24
.....ACATTTTGAACGGAGGAGTA..... 1 22
.....ACATTTTGAACGGAGGAGTAT..... 2 23
.....ACATTTTGAACGGAGGAGTATA..... 1 24
.....ATTTTGAACGGAGGAGTAT..... 1 21
.....TTTGAACGGAGGAGTAT..... 1 18
.....TTTGAACGGAGGAGTATA..... 3 21
.....TTTGAACGGAGGAGTATAA..... 1 21

```

```

>osa-miR2124a_MIMAT0011186_Oryza_sativa_miR2124a
TTTGTCTCGCAGTTTACAGCGGAATCTGTAATTTGTTTGTATTAGTCTACGTTAACTTTAAATGTGTGCGGTATATTTAAAAAATGGCACACAACTAAACACGCCAGTCTTTTATGATGTTATGATGATG
*****ACTTTAAATGTGTGCGGTATATTT*****

```

```

osa-miR2124a 24
1 21
1 24
1 21
1 19
1 24
1 23
1 23
1 21
1 24
1 23
1 24
1 23
1 24
1 24
1 21
1 18
1 21
1 21

```

```

.TTGTCTCGCAGTTTACAGCGG.....
.TTGTCTCGCAGTTTACAGCGGAA.....
.GTCTCGCAGTTTACAGCGGA.....
.CTCTCGCAGTTTACAGCGGA.....
.TCGCAGTTTACAGCGGAATCTGT.....
.CGCAGTTTACAGCGGAATCTGT.....
.GAATCTGTAATTTGTTTGTAT.....
.AATCTGTAATTTGTTTGTAT.....
.ATCTGTAATTTGTTTGTATTAG.....
.TCTGTAATTTGTTTGTATTAG.....
.....GTAATTTGTTTGTATTAGTCTA.....
.....AATTTGTTTGTATTAGTCTACG.....
.....TTTGTATTAGTCTACGTTA.....
.....ATTAGTCTACGTTAACTTTAA.....
.....ATTAGTCTACGTTAACTTTAAA.....
.....AATCTTTAAATGTGTGCGGTAT.....
.....TACTTTAAATGTGTGCGGTAT.....
.....TACTTTAAATGTGTGCGGTATAT.....

```

```

>osa-miR2124b_MIMAT0011187_Oryza_sativa_miR2124b
TAGGCTTAATAAAATCGTGTGCGGTTTACAGCGGATTCATTATTAGACTACGTTAACTTTAAATGTGTGCGGTATATCGATGTGACACCTAAAATTCACACCTGATCATACAGCCATATCATGATGC
*****ACTTTAAATGTGTGCGGTATATTT*****

```

```

osa-miR2124b 24
1 24
1 24
2 24
1 24
2 24
3 24
1 24
2 24
2 24
1 24
1 22
1 24

```

```

.GGCTTAATAAAATCGTGTGCGGT.....
.AATAAAATCGTGTGCGGTTTACA.....
.AAATTCGTGTGCGGTTTACAGGC.....
.TCGTGTGCGGTTTACAGCGGAT.....
.....GTTTACAGCGGATTCATTATTAG.....
.....ATTAGTCTACGTTAACTTTAA.....
.....AGACTAGTCTAACTTTAAATG.....
.....ACTAGTCTAACTTTAAATGTG.....
.....AATCTTTAAATGTGTGCGGTAT.....
.....TACTTTAAATGTGTGCGGTAT.....
.....TACTTTAAATGTGTGCGGTATAT.....

```

```

>osa-miR2124c_MIMAT0011188_Oryza_sativa_miR2124c
TTGCTCTGCTAGTTTCTGCGGAATCTGTAATTTATTGTTATTAGACACGTTAACTTTAAATGTGTGCGGTATATCGATGTGACACCTAAAATAAATTTTCCATCTAACTGGGCTTAGCAACAACCATG
*****ACTTTAAATGTGTGCGGTATATTT*****

```

```

osa-miR2124c 24
1 24
1 22
1 24

```

```

.....AATCTTTAAATGTGTGCGGTAT.....
.....TACTTTAAATGTGTGCGGTAT.....
.....TACTTTAAATGTGTGCGGTATAT.....

```

```

>osa-miR2124d_MIMAT0011189_Oryza_sativa_miR2124d
TTGACTCGCAGTTTCTGCGGAATCTGTAATTTATTGTTATTAGACTATGTTAACTTTAAATGTGTGCGGTATATCGATGTGACAACTAAAATTTTCCCACTAAAACAGGCAAAAGGCTGTAGT
*****ACTTTAAATGTGTGCGGTATATTT*****

```

```

osa-miR2124d 24
1 24
1 24
1 22
1 24

```

```

.....AGACTATGTTAACTTTAAATG.....
.....AATCTTTAAATGTGTGCGGTAT.....
.....TACTTTAAATGTGTGCGGTAT.....
.....TACTTTAAATGTGTGCGGTATAT.....

```

```

>osa-miR2124e_MIMAT0011190_Oryza_sativa_miR2124e
TTGCTCTCGCAGTTTACAGCGGAATGTAATTTGTTTGTATTAGTCTACGTTAACTTTAAATGTGTGCGGTATATCGATGTGACACGCTAAAATTTTCCACCTGAACAAACAGGCAATCTCACCAAGAC
*****ACTTTAAATGTGTGCGGTATATTT*****

```

```

osa-miR2124e 24
1 24
1 24
1 24
1 24
1 21
1 23
1 25
1 24
1 22
1 24
1 18
1 24

```

```

.....TCGTCTCGCAGTTTATAGCGGA.....
.....GCGGAATATGTAATTTGTTTGT.....
.....GTAATTTGTTTGTATTAGTCTA.....
.....AATTTGTTTGTATTAGTCTACG.....
.....TTTGTATTAGTCTACGTTA.....
.....ATTAGTCTACGTTAACTTTAA.....
.....ATTAGTCTACGTTAACTTTAAA.....
.....AATCTTTAAATGTGTGCGGTAT.....
.....TACTTTAAATGTGTGCGGTAT.....
.....TACTTTAAATGTGTGCGGTATAT.....
.....CGATGTGACACGCTAAA.....
.....ATGTGACACGCTAAAATTTTCA.....

```

```

>osa-miR2124f_MIMAT0011191_Oryza_sativa_miR2124f
TTGCTCTCTGGTTTACAGCGGATCTGCAATTTGTTTGTATTAGACTACGTTAACTTTAAATGTGTGCGGTATATCTATGTGACACGCCAACTTTACACCGTAGACTAAATACAGCTAAATTTATTTT
*****ACTTTAAATGTGTGCGGTATATTT*****

```

```

>osa-miR2124g_MIMAT0011192_Oryza_sativa_miR2124g
TTTCGCTCGCGGTTTACAGCGGAATCTCAATTTGTTTGTATTAGTCTACATTTAACTTTAAATGTGTCCGTATATTCAGTGTGACACGCCAAATTTTACAACCCGGATCTAAACACAGCCTTAGTCACCGCTGCT
*****ACTTTAAATGTGTCCGTATATTT*****
.....AATACTTTAAATGTGTCCGTAT.....
.....TACTTTAAATGTGTCCGTAT.....
.....TACTTTAAATGTGTCCGTATAT.....
.....ATTTTACAACCCGGATCTAAAC.....
osa-miR2124g 24
1 24
1 22
1 24
1 22

>osa-miR2124i_MIMAT0011193_Oryza_sativa_miR2124i
TTTCGCTCGTAGTTTACAAGTGAATCTGTAATTTGTTTGTAGCTACGTTTAACTTTAAATGTGTCCGTATATTCAGTGTGACACGCCAAATTTTACCCTCGAATCTAAACACAGCCTTATAAGATAATTT
*****ACTTTAAATGTGTCCGTATATTT*****
.....AATACTTTAAATGTGTCCGTAT.....
.....TACTTTAAATGTGTCCGTAT.....
.....TACTTTAAATGTGTCCGTATAT.....
.....ATATTGATGTGACACGCCAAATTT.....
.....ATATTGATGTGACACGCCAAATTT.....
.....ATTGATGTGACACGCCAAATTT.....
osa-miR2124i 24
1 24
1 22
1 24
1 23
2 24
1 24

>osa-miR2125_MIMAT0011194_Oryza_sativa_miR2125
GTAACCCCTCAATAGTATGCTACATGGGTATCTATAGCTCTTAATGCATTGCCTGTTTTCTCTATAGACTATCCAGGTTAATAGTAGCTTTGCTCTCTCTCATTAACTCTTCCAAGTAGGAAAATATGCT
*****TTTTCTCTATAGACTATCCAG*****
..AAACCCTCAATAGTATGCTA.....
..AAACCCTCAATAGTATGCTAC.....
..AAACCCTCAATAGTATGCTA.....
..TCAATAGTATGCTACATGG.....
..TAGTATGCTACATGGGTATCTA.....
..TATGCTACATGGGTATCTAT.....
..GTCTACATGGGTATCTATAGCTCT.....
..CTACATGGGTATCTATAGCTCT.....
..TACATGGGTATCTATAGCTCT.....
..TACATGGGTATCTATAGCTCTA.....
..GGGTATCTATAGCTCTAATGCA.....
..TATAGCTCTAATGCATTGC.....
..GCCTGTTTTCTCTATAGACTAT.....
..TTTTCTATAGACTATCCAGGT.....
..TTCTCTATAGACTATCCAGGT.....
..AGATAGCTTTGCTCTCTCTTCAT.....
..TCATTTAATCTCTTCCAAGTAGGA.....
..ATTTAATCTCTTCCAAGTAGGAAA.....
..AATCTCTTCCAAGTAGGAAA.....
..AATCTCTTCCAAGTAGGAAAATAT...
..TTCCAAGTAGGAAAATATGCT
osa-miR2125 24
1 23
2 24
1 22
1 20
1 23
1 21
1 24
1 24
1 21
1 24
1 24
1 21
1 24
1 24
2 24
1 25
1 24
1 24
1 20
4 24
5 21

>osa-miR2124h_MIMAT0011195_Oryza_sativa_miR2124h
TTTGTCTCGCGGTTTACAAGTGAATCTGTAATTTGTTTATTACTAGTCTATGTTTAACTTTAAATGTGTCCGTATATTCAGTGTGACACCTCAAACTTTTACCACCTGATAAAGATGACACAATGAGGGCTGGTG
*****ACTTTAAATGTGTCCGTATATTT*****
.....AATACTTTAAATGTGTCCGTAT.....
.....TACTTTAAATGTGTCCGTAT.....
.....TACTTTAAATGTGTCCGTATAT.....
osa-miR2124h 24
1 24
1 22
1 24

```



Fig. S8

|                                                                                                                                                                                                                                                 |  |             |    |
|-------------------------------------------------------------------------------------------------------------------------------------------------------------------------------------------------------------------------------------------------|--|-------------|----|
| <p>&gt;ppt-miR390b_MIMAT0003132_Physcomitrella_patens_miR390b<br/>ACATCGATGCGATAGATCGCCATTGTCGCCGAACTGGTCGACCTCCGCCGGCGTCTCTGGACTGAAGGGAGCTCCACTTTGGCGTCTCTGGCATGCAGCTGCAGTTGGTCTTAAGTTGACTCCACAGTTG<br/>*****AAGCTCAGGAGGGATAGCCG*****</p>     |  | ppt-miR390b | 21 |
| .....AAGCTCAGGAGGGATAGCCG.....                                                                                                                                                                                                                  |  | 9           | 20 |
| .....AAGCTCAGGAGGGATAGCCCA.....                                                                                                                                                                                                                 |  | 1           | 23 |
| .....AAGCTCAGGAGGGATAGCCGC.....                                                                                                                                                                                                                 |  | 1           | 22 |
| .....AAGCTCAGGAGGGATAGCCG.....                                                                                                                                                                                                                  |  | 1           | 19 |
| .....AAGCTCAGGAGGGATAGCCG.....                                                                                                                                                                                                                  |  | 264         | 21 |
| .....AGCTCAGGAGGGATAGCCG.....                                                                                                                                                                                                                   |  | 10          | 20 |
| .....AGCTCAGGAGGGATAGCCGC.....                                                                                                                                                                                                                  |  | 1           | 21 |
| <p>&gt;ppt-miR319a_MIMAT0003133_Physcomitrella_patens_miR319a<br/>GCCCGATACGGTATCCGAACGTTTGTCCCGGAACTGGTCGACCTCCGCCGGCGTCTCTGGACTGAAGGGAGCTCCACTTTGGCGTCTCTGGCATGCAGCTGCAGTTGGTCTTAAGTTGACTCCACAGTTG<br/>*****CTTGGACTGAAGGGAGCTCC*****</p>     |  | ppt-miR319a | 20 |
| .....AAGCTTGTCCCGGAACTGG.....                                                                                                                                                                                                                   |  | 1           | 21 |
| .....TCGACCTTCCGCCGGCGT.....                                                                                                                                                                                                                    |  | 13          | 19 |
| .....TCGACCTTCCGCCGGCGTCT.....                                                                                                                                                                                                                  |  | 33          | 20 |
| .....TCGACCTTCCGCCGGCGTCT.....                                                                                                                                                                                                                  |  | 64          | 21 |
| .....CGACCTTCCGCCGGCGTCT.....                                                                                                                                                                                                                   |  | 2           | 20 |
| .....GACCTTCCGCCGGCGTCT.....                                                                                                                                                                                                                    |  | 2           | 19 |
| .....GCTCTCTTGGACTGAAGGGAGCT.....                                                                                                                                                                                                               |  | 1           | 24 |
| .....TCTCTTGGACTGAAGGGAGCTCC.....                                                                                                                                                                                                               |  | 1           | 23 |
| .....TCTCTTGGACTGAAGGGAGCT.....                                                                                                                                                                                                                 |  | 13          | 21 |
| .....TCTCTTGGACTGAAGGGAGCT.....                                                                                                                                                                                                                 |  | 1           | 22 |
| .....TCTCTTGGACTGAAGGGAGCTCC.....                                                                                                                                                                                                               |  | 7           | 21 |
| .....TCTTGGACTGAAGGGAGCTC.....                                                                                                                                                                                                                  |  | 1           | 20 |
| .....CTTGGACTGAAGGGAGCTC.....                                                                                                                                                                                                                   |  | 24          | 19 |
| .....CTTGGACTGAAGGGAGCTCC.....                                                                                                                                                                                                                  |  | 442         | 20 |
| .....CTTGGACTGAAGGGAGCTCCAC.....                                                                                                                                                                                                                |  | 10          | 22 |
| .....CTTGGACTGAAGGGAGCTCCA.....                                                                                                                                                                                                                 |  | 403         | 21 |
| .....TTGGACTGAAGGGAGCTCC.....                                                                                                                                                                                                                   |  | 10          | 19 |
| .....TTGGACTGAAGGGAGCTCCA.....                                                                                                                                                                                                                  |  | 24          | 20 |
| .....TTGGACTGAAGGGAGCTCCAC.....                                                                                                                                                                                                                 |  | 23          | 21 |
| .....TGGACTGAAGGGAGCTCCA.....                                                                                                                                                                                                                   |  | 3           | 19 |
| .....TGGACTGAAGGGAGCTCCAC.....                                                                                                                                                                                                                  |  | 3           | 20 |
| <p>&gt;ppt-miR319b_MIMAT0003134_Physcomitrella_patens_miR319b<br/>CGCGTATGGAATCCGAAGTCTGATACGGGAGCTGATCAGTCTCAGGTTAGCATCTCTTGGACTGAAGGGAGCTCCCTTACAGGCCTGATTCAGTGTTCGCTGCTAGGTTGCCAATCTATGATCGCTGT<br/>*****CTTGGACTGAAGGGAGCTCC*****</p>       |  | ppt-miR319b | 20 |
| .....AAGTCTGATCCGGGAGCTGA.....                                                                                                                                                                                                                  |  | 10          | 21 |
| .....TTAGCATCTCTTGGACTGAA.....                                                                                                                                                                                                                  |  | 6           | 20 |
| .....TTAGCATCTCTTGGACTGAAG.....                                                                                                                                                                                                                 |  | 46          | 21 |
| .....ATCTCTTGGACTGAAGGGAG.....                                                                                                                                                                                                                  |  | 1           | 20 |
| .....ATCTCTTGGACTGAAGGGA.....                                                                                                                                                                                                                   |  | 1           | 19 |
| .....TCTCTTGGACTGAAGGGAGCTCC.....                                                                                                                                                                                                               |  | 1           | 23 |
| .....TCTCTTGGACTGAAGGGAGCT.....                                                                                                                                                                                                                 |  | 13          | 21 |
| .....TCTCTTGGACTGAAGGGAGCTC.....                                                                                                                                                                                                                |  | 1           | 22 |
| .....TCTTGGACTGAAGGGAGCTCC.....                                                                                                                                                                                                                 |  | 7           | 21 |
| .....TCTTGGACTGAAGGGAGCTC.....                                                                                                                                                                                                                  |  | 1           | 20 |
| .....CTTGGACTGAAGGGAGCTCT.....                                                                                                                                                                                                                  |  | 19          | 21 |
| .....CTTGGACTGAAGGGAGCTC.....                                                                                                                                                                                                                   |  | 24          | 19 |
| .....CTTGGACTGAAGGGAGCTCC.....                                                                                                                                                                                                                  |  | 442         | 20 |
| .....TTGGACTGAAGGGAGCTCC.....                                                                                                                                                                                                                   |  | 10          | 19 |
| .....TTGGACTGAAGGGAGCTCCT.....                                                                                                                                                                                                                  |  | 1           | 20 |
| <p>&gt;ppt-miR319c_MIMAT0003135_Physcomitrella_patens_miR319c<br/>AGAAATGCGAGGAAATCCGAATGCTGATGCGGGAGCTGAGCGTCTCAACTCAGCTTCTCTTGGACTGAAGGGAGCTCCCATGCTTTGGTGTAGGTAATGTGGAACCTGGTTGAGTTAGTAACTGTGTACCAATA<br/>*****CTTGGACTGAAGGGAGCTCC*****</p> |  | ppt-miR319c | 21 |
| .....AATGCTGATCCGGGAGCTGA.....                                                                                                                                                                                                                  |  | 13          | 21 |
| .....CTGATCCGGGAGCTGAGCGGT.....                                                                                                                                                                                                                 |  | 1           | 21 |
| .....GCGGTCTTCAACTCAGCTT.....                                                                                                                                                                                                                   |  | 5           | 19 |
| .....GCGGTCTTCAACTCAGCTTCTCT.....                                                                                                                                                                                                               |  | 1           | 23 |
| .....GCGGTCTTCAACTCAGCTTC.....                                                                                                                                                                                                                  |  | 11          | 20 |
| .....GCGGTCTTCAACTCAGCTTCT.....                                                                                                                                                                                                                 |  | 58          | 21 |
| .....GCTTCTTGGACTGAAGGGAGCTC.....                                                                                                                                                                                                               |  | 1           | 25 |
| .....GCTTCTTGGACTGAAGGGAGCTCC.....                                                                                                                                                                                                              |  | 1           | 26 |
| .....TCTCTTGGACTGAAGGGAGCTCC.....                                                                                                                                                                                                               |  | 1           | 23 |
| .....TCTCTTGGACTGAAGGGAGCT.....                                                                                                                                                                                                                 |  | 13          | 21 |
| .....TCTCTTGGACTGAAGGGAGCTC.....                                                                                                                                                                                                                |  | 1           | 22 |
| .....TCTTGGACTGAAGGGAGCTCC.....                                                                                                                                                                                                                 |  | 7           | 21 |
| .....TCTTGGACTGAAGGGAGCTC.....                                                                                                                                                                                                                  |  | 1           | 20 |
| .....CTTGGACTGAAGGGAGCTCC.....                                                                                                                                                                                                                  |  | 1171        | 21 |
| .....CTTGGACTGAAGGGAGCTCCA.....                                                                                                                                                                                                                 |  | 10          | 22 |
| .....CTTGGACTGAAGGGAGCTC.....                                                                                                                                                                                                                   |  | 24          | 19 |
| .....CTTGGACTGAAGGGAGCTCC.....                                                                                                                                                                                                                  |  | 442         | 20 |
| .....CTTGGACTGAAGGGAGCTCCCAT.....                                                                                                                                                                                                               |  | 1           | 23 |
| .....TTGGACTGAAGGGAGCTCC.....                                                                                                                                                                                                                   |  | 10          | 19 |
| .....TTGGACTGAAGGGAGCTCCCA.....                                                                                                                                                                                                                 |  | 1           | 21 |
| .....TTGGACTGAAGGGAGCTCCC.....                                                                                                                                                                                                                  |  | 31          | 20 |
| .....TGGACTGAAGGGAGCTCCC.....                                                                                                                                                                                                                   |  | 6           | 19 |
| .....TGGACTGAAGGGAGCTCCCA.....                                                                                                                                                                                                                  |  | 2           | 20 |
| <p>&gt;ppt-miR319d_MIMAT0003136_Physcomitrella_patens_miR319d<br/>CCCTGGATGGAATCCGAATGCTGATACGGGAGCTGTTCAATCTCCGGCTTAGCATCTCTTGGACTGAAGGGAGCTCCCGCTGTAAGCTTATTGCGTATGATAGCGTACCAAGTCTTATGATACAATCGCT<br/>*****CTTGGACTGAAGGGAGCTCC*****</p>     |  | ppt-miR319d | 21 |
| .....AATGCTGATCCGGGAGCTGT.....                                                                                                                                                                                                                  |  | 1           | 21 |
| .....TACGGGAGCTGTTCAATCTCCGG.....                                                                                                                                                                                                               |  | 6           | 24 |
| .....ACGGGAGCTGTTCAATCTCCGG.....                                                                                                                                                                                                                |  | 1           | 23 |
| .....GGAGCTGTTCAATCTCCGG.....                                                                                                                                                                                                                   |  | 1           | 19 |
| .....GGAGCTGTTCAATCTCCGG.....                                                                                                                                                                                                                   |  | 5           | 20 |
| .....GAGCTGTTCAATCTCCGGCTTAGC.....                                                                                                                                                                                                              |  | 2           | 24 |
| .....TGTTCAATCTCCGGCTTAGCA.....                                                                                                                                                                                                                 |  | 1           | 21 |
| .....TGTTCAATCTCCGGCTTAGCATC.....                                                                                                                                                                                                               |  | 1           | 23 |
| .....TCAATCTCCGGCTTAGCATC.....                                                                                                                                                                                                                  |  | 56          | 20 |
| .....TCAATCTCCGGCTTAGCATCT.....                                                                                                                                                                                                                 |  | 134         | 21 |
| .....TCAATCTCCGGCTTAGCAT.....                                                                                                                                                                                                                   |  | 19          | 19 |
| .....AATCTCCGGCTTAGCATCT.....                                                                                                                                                                                                                   |  | 1           | 19 |

```

.....TCCGGCTTAGCATCTCTTGA..... 1 21
.....TTAGCATCTCTGGACTGAA..... 6 20
.....TTAGCATCTCTGGACTGAA..... 46 21
.....ATCTCTGGACTGAAGGAG..... 1 20
.....ATCTCTGGACTGAAGGAG..... 1 19
.....TCTCTGGACTGAAGGAGCTCC..... 1 23
.....TCTCTGGACTGAAGGAGCT..... 13 21
.....TCTCTGGACTGAAGGAGCTC..... 1 22
.....TCTTGGACTGAAGGAGCTCC..... 7 21
.....TCTTGGACTGAAGGAGCTC..... 1 20
.....CTTGGACTGAAGGAGCTCC..... 1171 21
.....CTTGGACTGAAGGAGCTCCCC..... 14 22
.....CTTGGACTGAAGGAGCTC..... 24 19
.....CTTGGACTGAAGGAGCTC..... 442 20
.....TTGGACTGAAGGAGCTCC..... 10 19
.....TTGGACTGAAGGAGCTCCCC..... 6 21
.....TTGGACTGAAGGAGCTCC..... 31 20
.....TGGACTGAAGGAGCTCC..... 6 19
.....ACTGAAGGAGCTCCCGCTG..... 1 22

```

```

>ppt-miR533a_MIMAT0004783_Physcomitrella_patens_miR533a
TGTGAGGGACGAGCAGAGTTGGCTTGGCTCTTGTGGCCCTCCAGCAGCTCTCTCTCCTCAGCTCTGACAGCTCTCGTCTCTTGTCTCTTTTCAGCCACTTTGGATACTTTGGAGTGTTCGTTCTGCTCGA
*****CTCAGCTCTGACAGCTCTC***** ppt-miR533a 21
.....CTCCTCAGCTCTGACAGCTCTC..... 1 24
.....TCTCAGCTCTGACAGCTCTC..... 1 23
.....CTCAGCTCTGACAGCTCTC..... 3 22
.....CTCAGCTCTGACAGCTC..... 1 19
.....CTCAGCTCTGACAGCTCTC..... 1 22
.....CTCAGCTCTGACAGCTCT..... 4 20
.....CTCAGCTCTGACAGCTCTC..... 327 21
.....TCAAGCTCTGACAGCTCTC..... 2 21
.....TCAAGCTCTGACAGCTCTC..... 68 20
.....CACAGCTCTGACAGCTCTC..... 1 19

```

```

>ppt-miR534a_MIMAT0003138_Physcomitrella_patens_miR534a
ACCCACAAGTTTTGGAAGTTGTTTTGATTGGGGCCACCACATTGCTCGACTAGATTGATGTCATTGCAGTTGCATACATATGGATGGCGTTCAGTGAACAACCTTCGATCAAGGTGAGGGGGTACAGTTAGTTTC
*****ATGTCCATTGCAGTTGCATAC***** ppt-miR534a 22
.....AGTATGCCATTGCAGTTGCATAC..... 54 24
.....AGTATGCCATTGCAGTTGCA..... 1 21
.....AGTATGCCATTGCAGTTGCATA..... 11 23
.....AGTATGCCATTGCAGTTGCATAC..... 2 25
.....GTATGCCATTGCAGTTGCATA..... 1 22
.....TATGCCATTGCAGTTGCATA..... 130 21
.....TATGCCATTGCAGTTGCAT..... 15 20
.....TATGCCATTGCAGTTGCATACATA..... 1 25
.....TATGCCATTGCAGTTGCATAC..... 2568 22
.....TATGCCATTGCAGTTGCATAC..... 25 23
.....TATGCCATTGCAGTTGCATACAT..... 1 24
.....TATGCCATTGCAGTTGCA..... 24 19
.....ATGTCCATTGCAGTTGCATAC..... 387 21
.....ATGTCCATTGCAGTTGCATAC..... 5 22
.....ATGTCCATTGCAGTTGCATA..... 16 20
.....TGTCATTGCAGTTGCATAC..... 2 20

```

```

>ppt-miR536a_MIMAT0003144_Physcomitrella_patens_miR536a
CCAGTGTATAAAGTTTGTCCAGTGTAGCTCTTCACTTGGGGATTGCACAACAGGGGTTCTGTGCCAAGCTGTGTGCAACCTAAAGGTTGTTTAAATTCAGGTTTATGCATCAGGATTCGACGAGAGATACATGGG
*****TTCTGTCGAAGCTGTGTGCAAC***** ppt-miR536a 22
.....TTCTGTCGAAGCTGTGTGCAAC..... 1993 21
.....TTCTGTCGAAGCTGTGTGCA..... 4 19
.....TTCTGTCGAAGCTGTGTGCA..... 72 20
.....TTCTGTCGAAGCTGTGTGCAACTAA..... 1 26
.....TTCTGTCGAAGCTGTGTGCAACT..... 1 24
.....TTCTGTCGAAGCTGTGTGCAACC..... 301 23
.....TTCTGTCGAAGCTGTGTGCAACTA..... 1 25
.....TTCTGTCGAAGCTGTGTGCAAC..... 17988 22
.....TCGTGCCAAGCTGTGTGCAACC..... 8297 22
.....TCGTGCCAAGCTGTGTGCAAC..... 37 19
.....TCGTGCCAAGCTGTGTGCAAC..... 10950 21
.....TCGTGCCAAGCTGTGTGCAACT..... 13 23
.....TCGTGCCAAGCTGTGTGCAAC..... 1051 20
.....CGTGCCAAGCTGTGTGCAAC..... 247 20
.....CGTGCCAAGCTGTGTGCAACT..... 3 22
.....CGTGCCAAGCTGTGTGCAAC..... 24 19
.....CGTGCCAAGCTGTGTGCAACC..... 303 21
.....GTGCCAAGCTGTGTGCAACT..... 1 21
.....GTGCCAAGCTGTGTGCAAC..... 303 19
.....GTGCCAAGCTGTGTGCAACC..... 272 20
.....TGCCAAGCTGTGTGCAACC..... 73 19

```

```

>ppt-miR537a_MIMAT0003145_Physcomitrella_patens_miR537a
CTGTTTCTGTGATGCTTTGAGGTTTGGCATGAGATAGCATCGTTAGGCTTCAAACCTTGAAGTGTCTTACAGGCTACATATGATTAGTCTTGTGCATATCCAAGCTCTCGCATTCTCGATTGCATGTCGAGC
*****TTGAGGTGTTTTCTACAGGCTA***** ppt-miR537a 21
.....TTCAAACCTTGAAGTGTCTT..... 1 21
.....TCAAACCTTGAAGTGTCTT..... 4 21
.....CTTGAAGTGTCTTACAGGCTAC..... 1 23
.....TTGAGGTGTTTTCTACAGGC..... 2 19
.....TTGAGTGTCTTACAGGCT..... 5 20
.....TTGAGGTGTTTTCTACAGGCTA..... 26 21

```

```

>ppt-miR537b_MIMAT0003146_Physcomitrella_patens_miR537b
TGATTGAGCACTCTCAGATGTTTCAGATGTAATGAAACCGGTGCAAGCTCTGAGGTGTTTTCTACAGGCTACATATGATAGATGGCTACCTGGATATACCAAGTCTGGCTGTTGCATTTTCATGTTTCAA
*****TTGAGGTGTTTTCTACAGGCTA***** ppt-miR537b 21
.....AACCGGTGCAAGCTCTCAGCT..... 2 21
.....CTTCAAGCTCTTGAAGTGTCTT..... 1 21
.....TTCAAGCTCTTGAAGTGTCTT..... 51 22
.....TTCAAGCTCTTGAAGTGTCTTCTAC..... 1 24
.....TTCAAGCTCTTGAAGTGTCTTCT..... 170 21
.....TTCAAGCTCTTGAAGTGTCTT..... 3 20

```

```

.....TCAAGCTCTTGAGGTGTTT..... 1 19
.....TCAAGCTCTTGAGGTGTTTCT..... 250 21
.....TCAAGCTCTTGAGGTGTTTCTA..... 1 22
.....TCAAGCTCTTGAGGTGTTTCTAC..... 1 23
.....TCAAGCTCTTGAGGTGTTTCT..... 3 20
.....AAGCTCTTGAGGTGTTTCT..... 7 19
.....CTTGAGGTGTTTCTACAGGCTAC..... 1 23
.....TTGAGGTGTTTCTACAGGC..... 2 19
.....TTGAGGTGTTTCTACAGGCT..... 5 20
.....TTGAGGTGTTTCTACAGGCTA..... 26 21

```

```

>ppt-miR538a_MIMAT0003147_Physcomitrella_patens_miR538a
AGTTTATGACGAAGATCATGATCTTACAATGAGTTTGTGAGTCTCCATGCTCTAACATTGCATGGAGTCTATGCTGGATATTGCTCCTCATTCCCGTCAAATGCTGAAGTAATGCAAGAATGTGAACATGGGACT
*****TTGCATGGAGTCTATGCTGGA***** ppt-miR538a 22
.....AGTCTCCATGCTGCTCTAACAT..... 1 22
.....GTCTCCATGCTGCTCTAACAT..... 1 20
.....GTCTCCATGCTGCTCTAACAT..... 18 21
.....GTCTCCATGCTGCTCTAAC..... 1 19
.....GTCTCCATGCTGCTCTAACATT..... 3 22
.....CATGCTGCTCTAACATTGCATGG..... 1 23
.....CTCTAACATTGCATGGAGTCTA..... 5 22
.....CTCTAACATTGCATGGAGTCT..... 1 21
.....TCTAACATTGCATGGAGTCTAT..... 3 22
.....TCTAACATTGCATGGAGTCTA..... 4 21
.....CTAACATTGCATGGAGTCTAT..... 1 21
.....CTAACATTGCATGGAGTCTATG..... 1 22
.....TAACATTGCATGGAGTCTATGT..... 24 22
.....TAACATTGCATGGAGTCTATGCT..... 11 23
.....TAACATTGCATGGAGTCTATGCT..... 1 24
.....TAACATTGCATGGAGTCTATG..... 2 21
.....AACATTGCATGGAGTCTATGT..... 1 21
.....AACATTGCATGGAGTCTATGCTG..... 1 24
.....TTGCATGGAGTCTATGCTGG..... 24 21
.....TTGCATGGAGTCTATGCTG..... 2 20
.....TTGCATGGAGTCTATGCT..... 2 19
.....TTGCATGGAGTCTATGCTGAG..... 1 23
.....TTGCATGGAGTCTATGCTGGA..... 865 22
.....TTGCATGGAGTCTATGCTGGAGT..... 2 24
.....TGCATGGAGTCTATGCTGGAGT..... 1 23
.....TGCATGGAGTCTATGCTGGA..... 95 21
.....TGCATGGAGTCTATGCTGGA..... 13 22
.....TGCATGGAGTCTATGCTGG..... 11 20
.....GCATGGAGTCTATGCTGGA..... 1 20
.....CATGGAGTCTATGCTGGA..... 1 19
.....TGGAGTCTATGCTGGAGTATT..... 1 22

```

```

>ppt-miR538b_MIMAT0003148_Physcomitrella_patens_miR538b
CCATAGGAGTGGAGGTTATCTTGTACGAAGAGTTCTAGTCTCCATGCTCTAACGTTGCATGGAGTCTATGCTGGACTCCTCCATTGCTCTTCAAGAGAATGTGAGAATTTGAGATTCGGACATAGCCTTCA
*****TTGCATGGAGTCTATGCTGGA***** ppt-miR538b 22
.....CTCTAACGTTGCATGGAGTCT..... 1 21
.....TTGCATGGAGTCTATGCTGG..... 24 21
.....TTGCATGGAGTCTATGCTG..... 2 20
.....TTGCATGGAGTCTATGCTGGACC..... 1 24
.....TTGCATGGAGTCTATGCTCT..... 2 19
.....TTGCATGGAGTCTATGCTGGAC..... 12 23
.....TTGCATGGAGTCTATGCTGGA..... 865 22
.....TGCATGGAGTCTATGCTGGA..... 95 21
.....TGCATGGAGTCTATGCTGGAC..... 7 22
.....TGCATGGAGTCTATGCTGG..... 11 20
.....GCATGGAGTCTATGCTGGA..... 1 20
.....CATGGAGTCTATGCTGGA..... 1 19

```

```

>ppt-miR538c_MIMAT0003149_Physcomitrella_patens_miR538c
ATATAGAGTGGAGGATGTTTCAAGAGTCTTGTGAGTCTCCATGCTCTAACGTTGCATGGAGTCTATGCTGGACTCCTCCATTGCTCTTCAAGAGAATGTGAGCATTGAAGGATTCGGACATAGCCTTCA
*****TTGCATGGAGTCTATGCTGGA***** ppt-miR538c 22
.....AGTCTCCATGCTCTCTGACG..... 10 21
.....AGTCTCCATGCTCTCTGAC..... 1 20
.....TTGCATGGAGTCTATGCTGG..... 24 21
.....TTGCATGGAGTCTATGCTG..... 2 20
.....TTGCATGGAGTCTATGCTGGACC..... 1 24
.....TTGCATGGAGTCTATGCTCT..... 2 19
.....TTGCATGGAGTCTATGCTGGAC..... 12 23
.....TTGCATGGAGTCTATGCTGGA..... 865 22
.....TGCATGGAGTCTATGCTGGA..... 95 21
.....TGCATGGAGTCTATGCTGGAC..... 7 22
.....TGCATGGAGTCTATGCTGG..... 11 20
.....GCATGGAGTCTATGCTGGA..... 1 20
.....CATGGAGTCTATGCTGGA..... 1 19

```

```

>ppt-miR1215_MIMAT0003904_Physcomitrella_patens_miR1215
GCCAGTGCAGTAGAGCTTGTATCCCTGGCATGATTTGTGTTGCTGAAGTACTGGAGCTCATTGCAAAACTGTATACGATCCTTCAACTGAACAGCATTGAAAGCTTTGGCTATTGCTCAGAGATGTTATACAG
*****TCATTGCAAAACTGTATACGA***** ppt-miR1215 21
.....TCATTGCAAAACTGTATACGATC..... 3 23
.....TCATTGCAAAACTGTATACG..... 13 20
.....TCATTGCAAAACTGTATACGA..... 847 21
.....TCATTGCAAAACTGTATAC..... 6 19
.....TCATTGCAAAACTGTATACGAT..... 76 22
.....CATTGCAAAACTGTATACGA..... 13 20
.....ATTGCAAAACTGTATACGAT..... 1 20
.....ATTGCAAAACTGTATACGA..... 3 19

```

```

>ppt-miR1217-5p_MIMAT0004830_Physcomitrella_patens_miR1217-5p
ACGGAACGGAAGCCAGATATTGAGTGAAGTGGAAAGTCTGTTCTGGTTGATCTGGTATCATGTTGCAAAATGGCAAACTGTGACCGAATGGTACTCAGTTTTGAAATTTGAAGCATGATGCAAGTACAA
*****TGGTATCATGTTGCAAAATGGC***** ppt-miR1217-5p 21
.....TTGATCTGGTATCATGTTGC..... 2 21
.....TGGTATCATGTTGCAAAATGGCAA..... 5 24
.....TGGTATCATGTTGCAAAATGGC..... 39 21
.....TGGTATCATGTTGCAAAATGG..... 4 20

```

```

.....TGGTATCATGTTGCAAATGGCA..... 3 22
.....CTGTGACCGGAATGGTACTCAGT..... 1 23
.....CTGTGACCGGAATGGTACTCAGTT..... 7 24
.....TGTGACCGGAATGGTACTCAGTT..... 1 23
.....TGTGACCGGAATGGTACTCAGT..... 1 22
.....TGTGACCGGAATGGTACTCAG..... 1 21
.....TTTTGAAATTTGAAGCATGAT..... 1 21
.....TTTGAATTTGAAGCATGATG..... 1 21
.....TTGAAATTTGAAGCATGATGCAA..... 1 24
.....TGAATTTGAAGCATGATGCAAG..... 5 24
.....AAATTTGAAGCATGATGCAAG..... 2 22
.....AAATTTGAAGCATGATGCAAG..... 913 21
.....AAATTTGAAGCATGATGCA..... 2 19
.....AAATTTGAAGCATGATGCAAGT..... 15 22
.....AAATTTGAAGCATGATGCAAG..... 21 20
.....ATTTGAAGCATGATGCAAG..... 5 20
.....TTTGAAGCATGATGCAAG..... 1 19
.....TTGAAGCATGATGCAAGTAC..... 6 21

```

```

>ppt-miR1217-3p_MIMAT0003906_Physcomitrella_patens_miR1217-3p
GATCTTGGTATCATGTTGCAAATGGCAAACCTGTGACCGGAATGGTACTCAGTTTTGAAATTTGAAGCATGATGCAAGTACAACGGAATGGACGGTAGCTTCTGTAAACAAGTTGAGCTTTGTTGTTCTTACGA
*****AATTTGAAGCATGATGCAAG*****
.....TGGTATCATGTTGCAAATGGCAA..... 5 24
.....TGGTATCATGTTGCAAATGGC..... 39 21
.....TGGTATCATGTTGCAAATGG..... 4 20
.....TGGTATCATGTTGCAAATGGCA..... 3 22
.....CTGTGACCGGAATGGTACTCAGT..... 1 23
.....CTGTGACCGGAATGGTACTCAGTT..... 7 24
.....TGTGACCGGAATGGTACTCAGTT..... 1 23
.....TGTGACCGGAATGGTACTCAGT..... 1 22
.....TGTGACCGGAATGGTACTCAG..... 1 21
.....TTTTGAAATTTGAAGCATGAT..... 1 21
.....TTTGAATTTGAAGCATGATG..... 1 21
.....TTGAAATTTGAAGCATGATGCAA..... 1 24
.....TGAATTTGAAGCATGATGCAAG..... 5 24
.....AAATTTGAAGCATGATGCAAG..... 2 22
.....AAATTTGAAGCATGATGCAAG..... 913 21
.....AAATTTGAAGCATGATGCA..... 2 19
.....AAATTTGAAGCATGATGCAAGT..... 15 22
.....AAATTTGAAGCATGATGCA..... 21 20
.....ATTTGAAGCATGATGCAAG..... 5 20
.....TTTGAAGCATGATGCAAG..... 1 19
.....TTGAAGCATGATGCAAGTAC..... 6 21

```

```

>ppt-miR1218_MIMAT0003907_Physcomitrella_patens_miR1218
ACACTGGCAGTCATGAACACACCTCACTGCTTCACTGATTACATGTCGTGGTAGGCATCCTTAGAGTCGTAGGCCTCTGTGGAATCAAGATAGTTCACAGTCGTTTTGAACACACATCACAGGAGCCTACGACTC
*****CCTTAGAGTCGTAGGCCTCTG*****
.....TGGTAGGCATCCTTAGAGTCG..... 9 21
.....TGGTAGGCATCCTTAGAGT..... 1 19
.....TAGGCATCCTTAGAGTCGATG..... 2 21
.....TCCTTAGAGTCGTAGGCCTCT..... 2 21
.....CCTTAGAGTCGTAGGCCTCTG..... 596 21
.....CCTTAGAGTCGTAGGCCTCT..... 1 19
.....CCTTAGAGTCGTAGGCCTCTGT..... 53 22
.....CCTTAGAGTCGTAGGCCTCT..... 33 20
.....CCTTAGAGTCGTAGGCCTCTG..... 2 23
.....CCTTAGAGTCGTAGGCCTCTG..... 242 20
.....CCTTAGAGTCGTAGGCCTCT..... 8 19
.....CTTAGAGTCGTAGGCCTCTGTG..... 13 22
.....CTTAGAGTCGTAGGCCTCTGT..... 32 21
.....TTAGAGTCGTAGGCCTCTG..... 15 19
.....TTAGAGTCGTAGGCCTCTGTG..... 2 21
.....TTAGAGTCGTAGGCCTCTGT..... 1 20
.....AGAGTCGTAGGCCTCTGTG..... 1 19
.....AGAGTCGTAGGCCTCTGTG..... 4 21
.....TAGTTCACAGTCGTTTTGAAC..... 1 21
.....CATCACAGGAGCCTACGACTC..... 1 21

```

```

>ppt-miR535d_MIMAT0003915_Physcomitrella_patens_miR535d
TGGACATCGACTTGGCGTAAGTGCACCCGACATACACGTTTGACAGCGTAAGTGGGTGACACGAGAGAGACGACCGGAATGCGTTCATGCAGCGAGTGCCTGAGGTTGCGAGCGTCCCTCTCCCGTCGTC
*****TGACAACGAGAGAGACGACG*****
.....GTACAACGAGAGAGACGACG..... 1 22
.....TGACAACGAGAGAGACGACG..... 108 22
.....TGACAACGAGAGAGACGACG..... 43 20
.....TGACAACGAGAGAGACGACG..... 1216 21
.....TGACAACGAGAGAGACGAC..... 19 19
.....GACAACGAGAGAGACGACG..... 13 20
.....GACAACGAGAGAGACGACG..... 2 19
.....ACAACGAGAGAGACGACG..... 6 19
.....ACGAGAGAGACGACGCGGAA..... 1 21
.....ACGAGAGAGACGACGCGGA..... 1 20
.....AGAGAGACGCGGGAATGCGTTCA..... 1 24
.....CGAGCGTCCCTCTCCCGTGT..... 1 22
.....CGAGCGTCCCTCTCCCGTGT..... 1 21
.....GTGCCCTCTCCCGTGTCA..... 9 19

```

```

>ppt-miR1221-3p_MIMAT0004834_Physcomitrella_patens_miR1221-3p
CGGCGGTTTGTGCGAAGTGGTACCTTAGTGGTTGGACACATATGAATCAGGAGCATTGGCCCATGCACAGTATCTACGCAAGTCTCTGGTCTGTTGGTGCAGTGGCGAGAGGCTCAAGCTTCGGGACAGTGGAAA
*****TGCCCATGCACAGTATCTACG*****
.....TTGCCCATGCACAGTATCTACG..... 4 23
.....TTGCCCATGCACAGTATCT..... 1 20
.....TTGCCCATGCACAGTATCT..... 2 19
.....TTGCCCATGCACAGTATCTA..... 2 20
.....TTGCCCATGCACAGTATCTACG..... 101 22
.....TTGCCCATGCACAGTATCTAC..... 18 21

```

```

>ppt-miR1222a_MIMAT0003917_Physcomitrella_patens_miR1222a
GTTGTGGGCTTCTTGTGACTAATCTCTCATGCAAGTGGCTTCTAGCAGCTGCTTGAAGGAGTTCATTGGTATAATAATGCCACAACATGATGACCGATTAACTGAGCGACGCTACCGGAATGTTGATCGG

```

```

*****TTGAAGGAGTTCATTGGTATA*****
ppt-miR122a 21
.....TGCTAGTAACTCCTCATG..... 2 20
.....TGCTAGTAACTCCTCATG..... 43 21
.....CTGAAGGAGTTCATTGGTATA..... 1 22
.....TTGAAGGAGTTCATTGGTATA..... 1 23
.....TTGAAGGAGTTCATTGGTATA..... 4 19
.....TTGAAGGAGTTCATTGGTATA..... 5 22
.....TTGAAGGAGTTCATTGGTATA..... 597 21
.....TTGAAGGAGTTCATTGGTATA..... 19 20
.....TTGAAGGAGTTCATTGGTATA..... 3 20
.....GAAGGAGTTCATTGGTATA..... 1 19

```

```

>ppt-miR477c_MIMAT0004359_Physcomitrella_patens_miR477c
TAGTTGAATCACAGAGTTGCTACACGTTACAGCAGATGGAAGGTAGTTGATTTTCTCTCCCTCAAAGGCTTCAAAGCTCTTTTGTGAGCAAGCACGCTGGAAGCTTTGTTGAAGAGGAGAAACAATACC
*****CTCTCCCTCAAAGGCTTCCA*****
ppt-miR477c 20
.....TTTTCTCTCCCTCAAAGGC..... 1 21
.....TTTTCTCTCCCTCAAAGGCT..... 1 21
.....CTCTCCCTCAAAGGCTTCCA..... 2 21
.....CTCTCCCTCAAAGGCTTCCA..... 6 19
.....CTCTCCCTCAAAGGCTTCCAAGCT..... 4 24
.....CTCTCCCTCAAAGGCTTCCA..... 50 20
.....CTCTCCCTCAAAGGCTTCCAAGC..... 2 23
.....CTCTCCCTCAAAGGCTTCCAAC..... 9 22
.....CTCTCCCTCAAAGGCTTCCA..... 215 21
.....TCTCCCTCAAAGGCTTCCAAGCT..... 1 23
.....TCTCCCTCAAAGGCTTCCAAGC..... 5 22
.....TCTCCCTCAAAGGCTTCCAAC..... 5 21
.....TCTCCCTCAAAGGCTTCCA..... 106 20
.....TCTCCCTCAAAGGCTTCCA..... 22 19
.....TCCCTCAAAGGCTTCCAAC..... 5 19
.....TCCCTCAAAGGCTTCCAAGCT..... 1 21
.....GCTGGAAGCTTTTGTGAA..... 1 19
.....GCTGGAAGCTTTTGTGAAGGAA..... 6 24
.....CTGGAAGCTTTTGTGAAGGAA..... 20 23
.....CTGGAAGCTTTTGTGAAGGAA..... 2 21
.....TGGAAGCTTTTGTGAAGGAA..... 1 22
.....TGGAAGCTTTTGTGAAGGAGG..... 1 23
.....GGAAGCTTTTGTGAAGGAA..... 620 21
.....GGAAGCTTTTGTGAAGGAA..... 13 19
.....GAAGCTTTTGTGAAGGAA..... 2 19
.....GAAGCTTTTGTGAAGGAA..... 89 20
.....GAAGCTTTTGTGAAGGAA..... 9 21
.....AAGCTTTTGTGAAGGAA..... 1 19
.....TCTTTGTGAAGGAGGAA..... 4 20
.....TCTTTGTGAAGGAGGAA..... 25 21
.....CTTTGTGAAGGAGGAA..... 1 19
.....CTTTGTGAAGGAGGAAAC..... 1 21
.....TTTGTGAAGGAGGAAACA..... 1 21

```

```

>ppt-miR477f_MIMAT0004361_Physcomitrella_patens_miR477f
CTAGTGGCGAGCGAGTTCGATCTTGGCGGGATTGTGATATTCGGGTGTTGTTTCTCTCCCTCAAAGGCTTCCAACAACAGGAGGTTACAATCCATTGTGGTTATAACCCATAGTTGAGGTGTTTCTCTCTCTG
*****TCCCTCAAAGGCTTCCAACA*****
ppt-miR477f 21
.....TCTCCCTCAAAGGCTTCCAAC..... 5 21
.....TCTCCCTCAAAGGCTTCCA..... 106 20
.....TCTCCCTCAAAGGCTTCCA..... 22 19
.....TCCCTCAAAGGCTTCCAAC..... 5 19
.....TCCCTCAAAGGCTTCCAACA..... 9 23
.....TCCCTCAAAGGCTTCCAACA..... 26 20
.....TCCCTCAAAGGCTTCCAACA..... 14 22
.....TCCCTCAAAGGCTTCCAACA..... 183 21
.....CCCTCAAAGGCTTCCAACA..... 1 20
.....CCCTCAAAGGCTTCCAACA..... 3 22
.....CCCTCAAAGGCTTCCAACA..... 2 19
.....CCCTCAAAGGCTTCCAACA..... 1 21

```

```

>ppt-miR477g-5p_MIMAT0004362_Physcomitrella_patens_miR477g-5p
GAGAGGAAGAGATATGCTTCCGCGGAGTCTAATGGTTACAGGTTGTTGTTTCTCCCTCAAAGGCTTCCAACAACAGTCCGGAATTAACCTGTGAGCCATTACTGTTGAGGCTTCTGCTTTAGTCTCTCTCTG
*****TCCCTCAAAGGCTTCCAACA*****
ppt-miR477g-5p 21
.....TCTCCCTCAAAGGCTTCCAAC..... 5 21
.....TCTCCCTCAAAGGCTTCCA..... 106 20
.....TCTCCCTCAAAGGCTTCCA..... 22 19
.....TCCCTCAAAGGCTTCCAAC..... 5 19
.....TCCCTCAAAGGCTTCCAACA..... 9 23
.....TCCCTCAAAGGCTTCCAACA..... 26 20
.....TCCCTCAAAGGCTTCCAACA..... 14 22
.....TCCCTCAAAGGCTTCCAACA..... 183 21
.....CCCTCAAAGGCTTCCAACA..... 1 20
.....CCCTCAAAGGCTTCCAACA..... 3 22
.....CCCTCAAAGGCTTCCAACA..... 2 19
.....CCCTCAAAGGCTTCCAACA..... 1 21

```

```

>ppt-miR477g-3p_MIMAT0003902_Physcomitrella_patens_miR477g-3p
TCGGAATTAACCTGATCGGCCATTACTGTTGCAAGTGAATATTCTAGTTCTGCTGTTGGAAGCCTCTGTGGGAGCAGAAAGAACCTTGTGGAAGGCTTGAAGGCTTCTGCTTTAGTCTGCTGATCTA
*****GTTGGAAGCCTCTGTGGGAGA*****
ppt-miR477g-3p 21
.....GCTGTTGGAAGCCTCTGTGGGAGA..... 7 24
.....CTGTTGGAAGCCTCTGTGGGAGAC..... 1 24
.....CTGTTGGAAGCCTCTGTGGGAGA..... 67 23
.....CTGTTGGAAGCCTCTGTGGGAG..... 2 22
.....TGTGGAAGCCTCTGTGGGAGAC..... 2 23
.....TGTGGAAGCCTCTGTGGGAG..... 1 21
.....TGTGGAAGCCTCTGTGGGAGA..... 139 22
.....GTTGGAAGCCTCTGTGGGAGAC..... 14 22
.....GTTGGAAGCCTCTGTGGGAG..... 6 20
.....GTTGGAAGCCTCTGTGGGAGA..... 648 21
.....GTTGGAAGCCTCTGTGGGAG..... 2 19
.....TTGGAAGCCTCTGTGGGAGA..... 19 20
.....TGGAGCCTCTGTGGGAGA..... 5 19

```

```

>ppt-miR894_MIMAT0004365_Physcomitrella_patens_miR894
CTTCTTCTCCATAAATCAAATAATCAAAAAATAAACCAATACCTTCAACTCAAGCGTTTCCAGTCCGGTCCACCAATATGTTGATATGTGAAGTTTATTGATGAGAATGCACCGAGCACTTGGCTATGGAAG
*****CGTTTCACGTCGGGTTCACCA*****
ppt-miR894      20
.....GGTTTCACGTCGGGTTCACCA..... 1 22
.....CGTTTCACGTCGGGTTCACCA..... 1 19
.....CGTTTCACGTCGGGTTCACCA..... 2 20
.....CGTTTCACGTCGGGTTCACCA..... 1 22
.....CGTTTCACGTCGGGTTCACCA..... 102 21
.....GTTTCACGTCGGGTTCACCA..... 51 20
.....GTTTCACGTCGGGTTCACCAAT..... 1 23
.....GTTTCACGTCGGGTTCACCA..... 1 19
.....TTTCACGTCGGGTTCACCA..... 51 19

```

```

>ppt-miR896_MIMAT0004367_Physcomitrella_patens_miR896
GATTCTGGGTTGATCCCGCATGGTCTGGTCCCGGAATTGTAGATTGTGGCCGTGCAATTTGGCCGAGTGGTAAAGCGGCAGACTCGAAATCTGCTGGGTTTCCCGCGCAGGTTCAAATCTCGAGTTGACGACT
*****GTCAATTTGGCCGAGTGGTAAAGCG*****
ppt-miR896      25
.....ATTCTGGGTTGATCCCGCA..... 1 22
.....TTCTGGGTTGATCCCGCA..... 1 21
.....TCTGGGTTGATCCCGCA..... 1 20
.....TTCGATCCCGCATGGTCTG..... 1 22
.....TGGTCCCGGAATTGTAGATTG..... 1 23
.....GCCCGGAATTGTAGATTGTGGCC..... 2 24
.....GCCCGGAATTGTAGATTGTGGCC..... 1 24
.....GCCCGGAATTGTAGATTGTGGCC..... 2 21
.....GCCCGGAATTGTAGATTGTGGCC..... 9 23
.....GCCCGGAATTGTAGATTGTGGCC..... 23 22
.....ATTGTAGATTGTGGCCGCT..... 1 19
.....GTCAATTTGGCCGAGTGGTAAAGC..... 12 25
.....GTCAATTTGGCCGAGTGGT..... 80 20
.....GTCAATTTGGCCGAGTGGT..... 105 19
.....GTCAATTTGGCCGAGTGGTAAAG..... 144 23
.....GTCAATTTGGCCGAGTGGTAAAG..... 64 24
.....GTCAATTTGGCCGAGTGGTAAAG..... 123 21
.....GTCAATTTGGCCGAGTGGTAAAG..... 187 22
.....TCAATTTGGCCGAGTGGTAAAG..... 1 21
.....AATTTGGCCGAGTGGTAAAG..... 4 20
.....AATTTGGCCGAGTGGTAAAG..... 7 19
.....AATTTGGCCGAGTGGTAAAG..... 1 21
.....TTTGGCCGAGTGGTAAAG..... 2 19
.....TTTGGCCGAGTGGTAAAGC..... 1 20
.....TTGGCCGAGTGGTAAAGCGC..... 1 20
.....TCGAAATCTGCTGGGTTTTC..... 1 20
.....AATCTGCTGGGTTTCCCGCGCA..... 1 24
.....AATCTGCTGGGTTTCCCGCGC..... 1 22
.....ATCTGCTGGGTTTCCCGCGC..... 1 21
.....ATCTGCTGGGTTTCCCGCGCA..... 1 23
.....ATCTGCTGGGTTTCCCGCGC..... 1 22
.....TCTGCTGGGTTTCCCGCGCAG..... 1 23
.....TCTGCTGGGTTTCCCGCGCAGGT..... 1 25
.....TCTGCTGGGTTTCCCGCGCA..... 1 22
.....CTGCTGGGTTTCCCGCGCAGGT..... 2 24
.....CTGCTGGGTTTCCCGCGCAGG..... 1 23
.....TGCTGGGTTTCCCGCGCAGTT..... 1 24
.....TGCTGGGTTTCCCGCGCAGTTCA..... 1 26
.....TGCTGGGTTTCCCGCGCAG..... 1 22
.....CTGGGTTTCCCGCGCAGG..... 1 20
.....CTGGGTTTCCCGCGCAGTTCAA..... 1 26
.....TGGGTTTCCCGCGCAGTTTC..... 1 22
.....CGCGAGTTCAAATCTGCAGTT..... 1 24
.....GCGCAGTTCAAATCTGCAGT..... 1 22
.....GCGCAGTTCAAATCTGCAGT..... 11 23
.....GCGCAGTTCAAATCTGCAGT..... 1 20
.....GCGCAGTTCAAATCTGCAG..... 1 21
.....GCGCAGTTCAAATCTGCAGTTGA..... 2 25

```

```

>ppt-miR897_MIMAT0004368_Physcomitrella_patens_miR897
TCTTTCATGCTTAGCATTCAAATGACCAAGGTGTCGATGCCAAATGCCATCTTATCTTGATCAAGTGGAACTCAGCAAA*
*****TGATCAAGTGGAACTCAGCAAA*****
ppt-miR897      23
.....TTGATCAAGTGGAACTCAGCAAA..... 2 24
.....TGATCAAGTGGAACTCAGCAAA..... 3 22
.....TGATCAAGTGGAACTCAGCAAA..... 2 23
.....TGATCAAGTGGAACTCAGCAAA..... 1 24
.....TGATCAAGTGGAACTCAGC..... 1 20
.....AAGTGGAACTCAGCAATCGGC..... 2 24
.....AGTGGAACTCAGCAATCGGC..... 1 23
.....GAACTCAGCAATCGGCACCT..... 1 23
.....AGCAATCGGCACCTCAACT..... 1 22

```

```

>ppt-miR900-5p_MIMAT0004961_Physcomitrella_patens_miR900-5p
CCGACGTAGATGGCATGCAACTCCCACTTCGCAATGATACCGCTCTAAGATCGCGTCTTCCAGGTACAAGAACACAGCTCACCAGTAGTCGACCGTGGTGGAGCTGTTCTTGTACTGGGAAGACCACCAGCGAAG
*****TCCAGGTACAAGAACACAGC*****
ppt-miR900-5p  21
.....GGTCTTCCAGGTACAAGAAC..... 1 21
.....GTCTTCCAGGTACAAGAAC..... 11 20
.....GTCTTCCAGGTACAAGAAC..... 2 21
.....TCTTCCAGGTACAAGAAC..... 1 20
.....TCTTCCAGGTACAAGAAC..... 2 21
.....CTTCCAGGTACAAGAAC..... 1 19
.....TTCCAGGTACAAGAAC..... 1 19
.....TTCCAGGTACAAGAACACAG..... 3 21
.....TCCAGGTACAAGAACACAGC..... 15 21
.....TCCAGGTACAAGAACACAGCT..... 3 22
.....TCCAGGTACAAGAACACAGCTC..... 1 23
.....TCCAGGTACAAGAACACAG..... 1 19
.....TCCAGGTACAAGAACACAG..... 1 20
.....CCAGGTACAAGAACACAGCTCA..... 2 22
.....CCAGGTACAAGAACACAGCTC..... 2 20
.....CCAGGTACAAGAACACAGCTC..... 20 21
.....CAGGTACAAGAACACAGCTC..... 2 20
.....CAGGTACAAGAACACAGCTC..... 2 20
.....CAGGTACAAGAACACAGCTC..... 1 21
.....CAGGTACAAGAACACAGCTC..... 1 19

```

```

.....CAGGTACAAGAACACAGCTCA..... 22 21
.....AGGTACAAGAACACAGCTCAC..... 16 21
.....AGGTACAAGAACACAGCTCAC..... 3 22
.....AGGTACAAGAACACAGCTCA..... 27 20
.....AGGTACAAGAACACAGCTC..... 2 19
.....AGGTACAAGAACACAGCTCACCA..... 2 23
.....GGTACAAGAACACAGCTCACCA..... 1 22
.....TGGTGAGCTGTGTTCTGTACT..... 1 23
.....TGGTGAGCTGTGTTCTGTACT..... 2 21
.....GGTGAGCTGTGTTCTGTACTG..... 1 23
.....GTGAGCTGTGTTCTGTACT..... 1 19
.....TGAGCTGTGTTCTGTACTGGGA..... 2 24
.....TGAGCTGTGTTCTGTACTGG..... 7 22
.....TGAGCTGTGTTCTGTACTGGG..... 2 23
.....TGAGCTGTGTTCTGTACTG..... 1 21
.....GAGCTGTGTTCTGTACTGG..... 12 21
.....AGCTGTGTTCTGTACTGG..... 25 20
.....AGCTGTGTTCTGTACTG..... 1 19
.....AGCTGTGTTCTGTACTGGGAAG..... 1 24
.....AGCTGTGTTCTGTACTGGGA..... 11 22
.....AGCTGTGTTCTGTACTGGGA..... 4 23
.....AGCTGTGTTCTGTACTGGG..... 5 21
.....GCTGTGTTCTGTACTGGGA..... 8 21
.....GCTGTGTTCTGTACTGGGA..... 1 22
.....GCTGTGTTCTGTACTGGGAAGA..... 1 24
.....CTGTGTTCTGTACTGGGA..... 1 21
.....CTGTGTTCTGTACTGGGA..... 2 20
.....TGTTGTTCTGTACTGGGAAG..... 14 21
.....TGTTGTTCTGTACTGGGA..... 1 19
.....GTGTTCTGTACTGGGAAGA..... 2 21
.....TGTTCTGTACTGGGAAG..... 1 19

```

```

>ppt-miR900-3p_MIMAT0004370_Physcomitrella_patens_miR900-3p
AAGATCGCGTCTTCCAGGTACAAGAACACAGCTCACAGTAGTCGACGCTGGGAGCTGTGTTCTGTACTGGGAAGCACCCAGGGAAGAATAAGAATGGCAGTTGGAATCCGAAACAGGAAGA
*****TGTTCTGTACTGGGAAG***** ppt-miR900-3p 21
.....GGTCTTCCAGGTACAAGAAC..... 1 21
.....GTCTTCCAGGTACAAGAAC..... 11 20
.....GTCTTCCAGGTACAAGAACA..... 2 21
.....TCTTCCAGGTACAAGAACA..... 1 20
.....TCTTCCAGGTACAAGAACA..... 2 21
.....CTTCCAGGTACAAGAACA..... 1 19
.....TTCCAGGTACAAGAACA..... 1 19
.....TTCCAGGTACAAGAACA..... 3 21
.....TTCCAGGTACAAGAACA..... 15 21
.....TCCAGGTACAAGAACA..... 3 22
.....TCCAGGTACAAGAACA..... 1 23
.....TCCAGGTACAAGAACA..... 1 19
.....TCCAGGTACAAGAACA..... 1 20
.....CCAGGTACAAGAACA..... 2 22
.....CCAGGTACAAGAACA..... 2 20
.....CCAGGTACAAGAACA..... 20 21
.....CAGGTACAAGAACA..... 2 20
.....CAGGTACAAGAACA..... 2 22
.....CAGGTACAAGAACA..... 1 19
.....CAGGTACAAGAACA..... 22 21
.....AGGTACAAGAACA..... 16 21
.....AGGTACAAGAACA..... 3 22
.....AGGTACAAGAACA..... 27 20
.....AGGTACAAGAACA..... 2 19
.....AGGTACAAGAACA..... 2 23
.....GGTACAAGAACA..... 1 22
.....TGGTGAGCTGTGTTCTGTACT..... 1 23
.....TGGTGAGCTGTGTTCTGTACT..... 2 21
.....GGTGAGCTGTGTTCTGTACTG..... 1 23
.....GTGAGCTGTGTTCTGTACT..... 1 19
.....TGAGCTGTGTTCTGTACTGGGA..... 2 24
.....TGAGCTGTGTTCTGTACTGG..... 7 22
.....TGAGCTGTGTTCTGTACTGGG..... 2 23
.....GAGCTGTGTTCTGTACTGG..... 1 21
.....GAGCTGTGTTCTGTACTGG..... 12 21
.....AGCTGTGTTCTGTACTGG..... 25 20
.....AGCTGTGTTCTGTACTG..... 1 19
.....AGCTGTGTTCTGTACTGGGAAG..... 1 24
.....AGCTGTGTTCTGTACTGGGA..... 11 22
.....AGCTGTGTTCTGTACTGGGA..... 4 23
.....AGCTGTGTTCTGTACTGGG..... 5 21
.....GCTGTGTTCTGTACTGGGA..... 8 21
.....GCTGTGTTCTGTACTGGGA..... 1 22
.....GCTGTGTTCTGTACTGGGAAGA..... 1 24
.....CTGTGTTCTGTACTGGGA..... 1 21
.....CTGTGTTCTGTACTGGGA..... 2 20
.....TGTTCTGTACTGGGAAG..... 14 21
.....TGTTCTGTACTGGGA..... 1 19
.....GTGTTCTGTACTGGGAAGA..... 2 21
.....TGTTCTGTACTGGGAAG..... 1 19

```

```

>ppt-miR902b-5p_MIMAT0004963_Physcomitrella_patens_miR902b-5p
AGTGTTCGAGGAGTATGAGGAGATGGAGAGCTGCAGACTGTTTCTTCTAGCCTATGATGCAGATCTTCATCTGTTGTTATGTTCTCATGTTGATACATAACAGACGAAGGTCGCATACGCAAGAGGA
*****TATGATGCAGATCTTCATCT***** ppt-miR902b-5p 21
.....TCCTTAGCCTATGATGCAGA..... 1 21
.....TAGCCTATGATGCAGATCTTC..... 12 22
.....AGCCTATGATGCAGATCTTCATCT..... 1 25
.....AGCCTATGATGCAGATCTTCATCT..... 1 22
.....CTATGATGCAGATCTTCATCTG..... 1 23
.....CTATGATGCAGATCTTCATCT..... 1 20
.....CTATGATGCAGATCTTCATCT..... 1 22
.....TATGATGCAGATCTTCATCT..... 33 19
.....TATGATGCAGATCTTCATCTGTT..... 1 24
.....TATGATGCAGATCTTCATCTG..... 66 22
.....TATGATGCAGATCTTCATCT..... 413 21
.....TATGATGCAGATCTTCATCT..... 66 20

```

```

.....ATGATGCAGATTCCTCATCT..... 8 20
.....ATGATGCAGATTCCTCATC..... 1 19
.....TGATGCAGATTCCTCATCTG..... 1 20
.....TTTGTATCGTCTCATGGTACAT..... 1 26
.....AGACGAAGGCTGCATCATAG..... 3 21
.....AGACGAAGGCTGCATCATATA..... 1 20
.....GACGAAGGCTGCATCATAGC..... 4 21
.....GACGAAGGCTGCATCATAG..... 1 20
.....ACGAAGGCTGCATCATAGC..... 98 20
.....ACGAAGGCTGCATCATAG..... 5 19
.....CGAAGGCTGCATCATAG..... 4 19

```

```

>ppt-miR536b_MIMAT0004378_Physcomitrella_patens_miR536b
GCATCATTGGTAGTGTCAAACCTATTCTCCCGAGTTGTAGCGGAATGATACCAGAAATTCGTGCCAAGCTGTGTGCAACCAAGGGGTTTGTACTTAAAGTCCACATGGGAGGCGTCCCTACCAAGCACACCATGGCT
*****TTTCGTGCCAAGCTGTGTGCAAC***** ppt-miR536b 22
.....AATTCGTGCCAAGCTGTGTGCAACC..... 4 25
.....AATTCGTGCCAAGCTGTGTGCAAC..... 6 24
.....ATTTCGTGCCAAGCTGTGTGCAAC..... 5 23
.....TTTCGTGCCAAGCTGTGTGCAAC..... 1993 21
.....TTTCGTGCCAAGCTGTGTGCA..... 4 19
.....TTTCGTGCCAAGCTGTGTGCA..... 72 20
.....TTTCGTGCCAAGCTGTGTGCAACCA..... 10 24
.....TTTCGTGCCAAGCTGTGTGCAACC..... 301 23
.....TTTCGTGCCAAGCTGTGTGCAAC..... 17988 22
.....TCGTGCCAAGCTGTGTGCAACC..... 8297 22
.....TCGTGCCAAGCTGTGTGCA..... 37 19
.....TCGTGCCAAGCTGTGTGCAAC..... 10950 21
.....TCGTGCCAAGCTGTGTGCAACCA..... 8 23
.....TCGTGCCAAGCTGTGTGCAAC..... 1051 20
.....CGTGCCAAGCTGTGTGCAAC..... 247 20
.....CGTGCCAAGCTGTGTGCAAC..... 24 19
.....CGTGCCAAGCTGTGTGCAACC..... 303 21
.....GTGC AAGCTGTGTGCAAC..... 303 19
.....GTGC AAGCTGTGTGCAACC..... 272 20
.....TGCCAAGCTGTGTGCAACC..... 73 19
.....TGCCAAGCTGTGTGCAACCAAG..... 2 22
.....AAGCTGTGTGCAACCAAGGG..... 1 21

```

```

>ppt-miR904a_MIMAT0004379_Physcomitrella_patens_miR904a
CTTGGAGCGATGTTGGAGTTCCTTCGGTGTGGTTGCAATATTTGTGATGCTAATATGGTCTTGTCAATGTTTAGGGGCAAGGCCGCTATTATGCAGATGCTTGGTAAAGCTTATGCTTGTACAACCTTTTGTATTGGC
*****TCTTGTCAATGTTTAGGGGCA***** ppt-miR904a 21
.....TGGTCTTGTCAATGTTTAGGG..... 1 21
.....TGGTCTTGTCAATGTTTAGGG..... 1 20
.....TCTTGTCAATGTTTAGGGGCA..... 442 22
.....TCTTGTCAATGTTTAGGGGCAAG..... 9 24
.....TCTTGTCAATGTTTAGGGG..... 7 19
.....TCTTGTCAATGTTTAGGGGCA..... 9 23
.....TCTTGTCAATGTTTAGGGGC..... 10 20
.....TCTTGTCAATGTTTAGGGGCA..... 6743 21
.....CTTGTCAATGTTTAGGGGCA..... 121 21
.....CTTGTCAATGTTTAGGGGC..... 6 19
.....CTTGTCAATGTTTAGGGGCAAG..... 4 23
.....CTTGTCAATGTTTAGGGGCA..... 2602 20
.....CTTGTCAATGTTTAGGGGCA..... 1 22
.....TTGTCAATGTTTAGGGGCA..... 75 19
.....TTGTCAATGTTTAGGGGCA..... 28 20
.....TGTCAATGTTTAGGGGCA..... 2 19

```

```

>ppt-miR904b_MIMAT0004380_Physcomitrella_patens_miR904b
TACTCGTCATCTTGGAGCGATGTTGTGTCATGATGGCGGATTTTGTGATGCTAATACGGTCTTGTCAATGTTTAGGGGCAAGGCCAAGCTATGCAACATCCCTGGTGGAGCTTGTATCGCGTAAAGTGTGTAGTGC
*****TCTTGTCAATGTTTAGGGGCA***** ppt-miR904b 21
.....TCTTGTCAATGTTTAGGGGCA..... 442 22
.....TCTTGTCAATGTTTAGGGGCAAG..... 9 24
.....TCTTGTCAATGTTTAGGGG..... 7 19
.....TCTTGTCAATGTTTAGGGGCA..... 9 23
.....TCTTGTCAATGTTTAGGGGC..... 10 20
.....TCTTGTCAATGTTTAGGGGCA..... 6743 21
.....CTTGTCAATGTTTAGGGGCA..... 121 21
.....CTTGTCAATGTTTAGGGGC..... 6 19
.....CTTGTCAATGTTTAGGGGCAAG..... 4 23
.....CTTGTCAATGTTTAGGGGCA..... 2602 20
.....CTTGTCAATGTTTAGGGGCA..... 1 22
.....TTGTCAATGTTTAGGGGCA..... 75 19
.....TTGTCAATGTTTAGGGGCA..... 28 20
.....TGTCAATGTTTAGGGGCA..... 2 19
.....GGTGCAACTATGCAACATCCCTGG..... 1 24

```

```

>ppt-miR898b_MIMAT0004381_Physcomitrella_patens_miR898b
ATTCTAATCTACTGCAGAAGTACAGATTACATCTGCTTGTGTCATTTCCGGCATCTTGTGTGCACTACTAGTACGCCGCTAGTTGCAGGCATTCCGGGTGCAGCAACTGACCGGAAGACTTTTCCAGAGTGT
*****TTGCTGTGCACTACTAGTAC***** ppt-miR898b 21
.....TCCGGCATCTTGTGCTACT..... 1 21
.....CATCTTGTGCTGCACTACTTA..... 1 21
.....ATCTTGTGCTGCACTACTAGTAC..... 1 24
.....ATCTTGTGCTGCACTACTAGTACG..... 1 25
.....ATCTTGTGCTGCACTACTTA..... 1 20
.....ATCTTGTGCTGCACTACTAG..... 90 21
.....ATCTTGTGCTGCACTACTAGT..... 11 22
.....TCTTGTGCTGCACTACTAGT..... 70 21
.....TCTTGTGCTGCACTACTAGTAC..... 2 23
.....TCTTGTGCTGCACTACTAG..... 33 20
.....TCTTGTGCTGCACTACTTA..... 1 19
.....CTTGTGCTGCACTACTAGTA..... 1 21
.....CTTGTGCTGCACTACTAGTACG..... 2 23
.....CTTGTGCTGCACTACTAGTAC..... 8 22
.....CTTGTGCTGCACTACTAGT..... 2 20
.....TTGCTGTGCACTACTAGTA..... 367 20
.....TTGCTGTGCACTACTAGTAC..... 5033 21
.....TTGCTGTGCACTACTAGTACG..... 10 23
.....TTGCTGTGCACTACTAGT..... 7 19

```



```

.....TTGCTGGCACTACTAGTACG..... 554 22
.....TGCTGGCACTACTAGTA..... 17 19
.....TGCTGGCACTACTAGTACGCG..... 5 23
.....TGCTGGCACTACTAGTACGC..... 1 22
.....TGCTGGCACTACTAGTAC..... 222 20
.....TGCTGGCACTACTAGTACG..... 637 21
.....GCTGGCACTACTAGTAC..... 21 19
.....GCTGGCACTACTAGTACGCG..... 1 22
.....GCTGGCACTACTAGTACG..... 5 20
.....TGCTGGCACTACTAGTACGCG..... 1 20
.....ACGCGGTAGTTGAGGCATT..... 1 21

```

```

>ppt-miR898a_MIMAT0004382_Physcomitrella_patens_miR898a
ATTTTCATTTCGAGCGAAGCTTAGCTACACCAAACTCTCTGTTGTTCCGGCGTATGCTGGCACTACTAGTACACGCGTATCGGTTGCACTCCAGATGTAGCAATTGAAACGAAGATATTCTGGAAAGTT
*****TTGCTGGCACTACTAGTAC*****
.....TCCGCGTATTGCTGGCACT..... ppt-miR898a 21
.....CGGCGTATTGCTGGCACTAC..... 1 21
.....GTATTGCTGGCACTACTAG..... 4 21
.....TATTGCTGGCACTACTAGTA..... 1 22
.....ATTGCTGGCACTACTAGTAC..... 1 22
.....TTGCTGGCACTACTAGTACAC..... 6 23
.....TTGCTGGCACTACTAGTA..... 367 20
.....TTGCTGGCACTACTAGTAC..... 5033 21
.....TTGCTGGCACTACTAGTACA..... 1768 22
.....TTGCTGGCACTACTAGT..... 7 19
.....TTGCTGGCACTACTAGTACACGC..... 1 25
.....TGCTGGCACTACTAGTA..... 17 19
.....TGCTGGCACTACTAGTACA..... 76 21
.....TGCTGGCACTACTAGTAC..... 222 20
.....TGCTGGCACTACTAGTACAC..... 2 22
.....GCTGGCACTACTAGTAC..... 21 19
.....GCTGGCACTACTAGTACA..... 6 20
.....ACTACTAGTACACGCGTATCG..... 1 22
.....ACTACTAGTACACGCGTATCGGTT..... 1 26

```

```

>ppt-miR408b_MIMAT0005050_Physcomitrella_patens_miR408b
CCAGCGTGAGGCAATGCATGACAACAGCATGCCAAGAGGCTCTGAGGGTGTTCCTCATGCACCTCTCCCTGGCTCCCTACATAGCTGCCATTCCTGTCTGCCACTTTCTGGATTGTTGCTGCTGCT
*****TGCACTGCCTCTCCCTGGCT*****
.....CCAGCGTGAGGCAATGCATGA..... ppt-miR408b 21
.....CCAGCGTGAGGCAATGCATGAC..... 12 21
.....CCAGCGTGAGGCAATGCATG..... 1 22
.....CAGCGTGAGGCAATGCATGACA..... 1 20
.....CAGCGTGAGGCAATGCATGA..... 50 20
.....CAGCGTGAGGCAATGCATGAC..... 2 21
.....AGCGTGAGGCAATGCATGA..... 2 19
.....CGTGAGGCAATGCATGACA..... 1 19
.....ATGCACTGCCTCTCCCTGGCT..... 1 22
.....ATGCACTGCCTCTCCCTGGC..... 2 21
.....TGCACTGCCTCTCCCTGGCTCC..... 1 24
.....TGCACTGCCTCTCCCTGGCT..... 11 21
.....TGCACTGCCTCTCCCTGGCTC..... 1 23
.....TGCACTGCCTCTCCCTGGCT..... 4 22

```

```

>ppt-miR477d_MIMAT0005051_Physcomitrella_patens_miR477d
GCCGTCGATTAATCATCTGGCTGTGGAAGTTGATTTCGATTAACAGATTGCTGTTCTCTCCCTCAAAGGCTTCCAACACAGTACTTGGCTGTTTACCAGCAAGCTAAGGCCGCTCCAGATGTAGAA
*****CTCTCCCTCAAAGGCTTCCA*****
.....CTCTCCCTCAAAGGCTTCCA..... ppt-miR477d 20
.....CTCTCCCTCAAAGGCTTCC..... 2 21
.....CTCTCCCTCAAAGGCTTCC..... 6 19
.....CTCTCCCTCAAAGGCTTCCA..... 50 20
.....CTCTCCCTCAAAGGCTTCCAAC..... 9 22
.....CTCTCCCTCAAAGGCTTCCA..... 215 21
.....TCTCCCTCAAAGGCTTCCAAC..... 5 21
.....TCTCCCTCAAAGGCTTCCA..... 106 20
.....TCTCCCTCAAAGGCTTCCA..... 22 19
.....TCCCTCAAAGGCTTCCAAC..... 5 19
.....TCCCTCAAAGGCTTCCAACAAC..... 9 23
.....TCCCTCAAAGGCTTCCAACA..... 26 20
.....TCCCTCAAAGGCTTCCAACAAC..... 14 22
.....TCCCTCAAAGGCTTCCAACA..... 183 21
.....CCCTCAAAGGCTTCCAACA..... 1 20
.....CCCTCAAAGGCTTCCAACAAC..... 3 22
.....CCCTCAAAGGCTTCCAACA..... 2 19
.....CCCTCAAAGGCTTCCAACAAC..... 1 21

```

```

>ppt-miR477e_MIMAT0005052_Physcomitrella_patens_miR477e
GTTTGGCGTTGGAAGTATCCGGTGTGATGAGAAGATTCCGAAAGCGTGTGCTATCTCTCCCTCAAAGGCTTCCAACATCAGTGTAGAAGCCTTGCTAGAAGCCTTTGTTGGGAGAGGGGAAACAACGCCTTG
*****CTCTCCCTCAAAGGCTTCCA*****
.....CTCTCCCTCAAAGGCTTCC..... ppt-miR477e 20
.....CTCTCCCTCAAAGGCTTCCA..... 6 19
.....CTCTCCCTCAAAGGCTTCCA..... 50 20
.....CTCTCCCTCAAAGGCTTCCAAC..... 9 22
.....CTCTCCCTCAAAGGCTTCCA..... 215 21
.....TCTCCCTCAAAGGCTTCCAAC..... 5 21
.....TCTCCCTCAAAGGCTTCCA..... 106 20
.....TCTCCCTCAAAGGCTTCCA..... 22 19
.....TCCCTCAAAGGCTTCCAAC..... 5 19
.....TCCCTCAAAGGCTTCCAACA..... 26 20
.....TCCCTCAAAGGCTTCCAACATCA..... 1 23
.....TCCCTCAAAGGCTTCCAACAT..... 2 21
.....CCCTCAAAGGCTTCCAACA..... 2 19
.....CATCAGGTGTAGAAGCCTTGCT..... 4 22
.....TCAGGTGTAGAAGCCTTGCT..... 1 20
.....TAGAAGCCTTTGTTGGGAGAG..... 1 20
.....AGAAGCCTTTGTTGGGAGAGG..... 851 21
.....AGAAGCCTTTGTTGGGAGAG..... 9 19
.....AGAAGCCTTTGTTGGGAGAGG..... 5 20
.....GAAGCCTTTGTTGGGAGAGG..... 13 20
.....AAGCCTTTGTTGGGAGAGG..... 11 19
.....TTTGTGGGAGAGGGGAAACA..... 1 21
.....TTTGTGGGAGAGGGGAAAC..... 1 20

```

```

>ppt-miR533c_MIMAT0005061_Physcomitrella_patens_miR533c
GATTGGTGACCTTGAAGTGGTCAAGGAAAGCCAAAGTCCAAAGTTCACACTCTTCTCTCACAGCTGACAGCTCTCTGTATCTCTCCCTAGTATATGTCTACAGCTGGTGACGCAACGAGGTTAAACAGCTA
*****CTCACAGCTGACAGCTCTC*****
ppt-miR533c 21
.....TGCTCTCACAGCTGACAGCTCTC..... 8 25
.....GCTCTCACAGCTGACAGCTCTC..... 2 24
.....CTCACAGCTGACAGCTCTC..... 1 19
.....CTCACAGCTGACAGCTCTCT..... 2 22
.....CTCACAGCTGACAGCTCT..... 4 20
.....CTCACAGCTGACAGCTCTCT..... 327 21
.....TCACAGCTGACAGCTCTCT..... 1 21
.....TCACAGCTGACAGCTCTC..... 68 20
.....CACAGCTGACAGCTCTC..... 1 19
.....ACAGCTGACAGCTCTCT..... 2 19

```

```

>ppt-miR536d_MIMAT0005064_Physcomitrella_patens_miR536d
TCTACTCTGGTGTGATGTTGAACCACTCCACCCTGTAGCGGAAAGATGTTAGAAATTCGTGCAAGCTGTGTGCAACCAAGGGGTTTGTACTTCAAATCCACATCGGAGGAGGTCCTACCAGTACACCATGAAT
*****ATTTCGTGCAAGCTGTGTGCAAC*****
ppt-miR536d 22
.....ATTTCGTGCAAGCTGTGTGCAA..... 1 23
.....TTTCGTGCAAGCTGTGTGCAAC..... 7 23
.....TTTCGTGCAAGCTGTGTGCAA..... 4 22
.....TTTCGTGCAAGCTGTGTGCAA..... 1993 21
.....TTTCGTGCAAGCTGTGTGCA..... 4 19
.....TTTCGTGCAAGCTGTGTGCA..... 72 20
.....TTTCGTGCAAGCTGTGTGCAACCA..... 10 24
.....TTTCGTGCAAGCTGTGTGCAACCC..... 301 23
.....TTTCGTGCAAGCTGTGTGCAAC..... 17988 22
.....TCGTGCAAGCTGTGTGCAACCC..... 8297 22
.....TCGTGCAAGCTGTGTGCA..... 37 19
.....TCGTGCAAGCTGTGTGCAAC..... 10950 21
.....TCGTGCAAGCTGTGTGCAACCA..... 8 23
.....TCGTGCAAGCTGTGTGCAAC..... 1051 20
.....CGTGCAAGCTGTGTGCAAC..... 247 20
.....CGTGCAAGCTGTGTGCAA..... 24 19
.....CGTGCAAGCTGTGTGCAACCC..... 303 21
.....GTGCAAGCTGTGTGCAAC..... 303 19
.....GTGCAAGCTGTGTGCAACCC..... 272 20
.....TGCAAGCTGTGTGCAACCC..... 73 19
.....TGCAAGCTGTGTGCAACCAAG..... 2 22
.....AAGCTGTGTGCAACCAAGGG..... 1 21

```

```

>ppt-miR536e_MIMAT0005065_Physcomitrella_patens_miR536e
GTCAATCTTCAAGTGTGATGATGTTGAACCACTCCACCCTGTAGCGGAAAGATGTTAGAAATTCGTGCAAGCTGTGTGCAACCAAGGGATTCCTACTCATGTTCTGCTGACTAGTATCGCCAGGACAAGCATGGCC
*****TTTCGTGCAAGCTGTGTGCAAC*****
ppt-miR536e 22
.....TTTCGTGCAAGCTGTGTGCAAC..... 7 23
.....TTTCGTGCAAGCTGTGTGCAA..... 4 22
.....TTTCGTGCAAGCTGTGTGCAA..... 1993 21
.....TTTCGTGCAAGCTGTGTGCA..... 4 19
.....TTTCGTGCAAGCTGTGTGCA..... 72 20
.....TTTCGTGCAAGCTGTGTGCAACCA..... 10 24
.....TTTCGTGCAAGCTGTGTGCAACCC..... 301 23
.....TTTCGTGCAAGCTGTGTGCAAC..... 17988 22
.....TCGTGCAAGCTGTGTGCAACCC..... 8297 22
.....TCGTGCAAGCTGTGTGCA..... 37 19
.....TCGTGCAAGCTGTGTGCAAC..... 10950 21
.....TCGTGCAAGCTGTGTGCAACCA..... 8 23
.....TCGTGCAAGCTGTGTGCAACCC..... 1051 20
.....CGTGCAAGCTGTGTGCAAC..... 247 20
.....CGTGCAAGCTGTGTGCAA..... 24 19
.....CGTGCAAGCTGTGTGCAACCC..... 303 21
.....GTGCAAGCTGTGTGCAAC..... 303 19
.....GTGCAAGCTGTGTGCAACCC..... 272 20
.....TGCAAGCTGTGTGCAACCC..... 73 19
.....TGCAAGCTGTGTGCAACCAAG..... 2 22
.....AAGCTGTGTGCAACCAAGGGA..... 1 21

```

```

>ppt-miR536f_MIMAT0005066_Physcomitrella_patens_miR536f
AGATATCGGTCGGTAGAGTTGAGGTTTGTTCACATGACCTTAGCTCTGTTTCCGAGCGCTTCTGCAAGCTGTGTGCATCAAGGGAATCTCACTTCTAACAGAAAGTTGCCCAAGAGTCGGAGCAAGACTGCA
*****TTTCGTGCAAGCTGTGTGCA*****
ppt-miR536f 20
.....TTTCGTGCAAGCTGTGTGCAT..... 7 21
.....TTTCGTGCAAGCTGTGTGCA..... 4 19
.....TTTCGTGCAAGCTGTGTGCA..... 72 20
.....TTTCGTGCAAGCTGTGTGCATCT..... 1 23
.....TTTCGTGCAAGCTGTGTGCATC..... 12 22
.....TCGTGCAAGCTGTGTGCAT..... 10 20
.....TCGTGCAAGCTGTGTGCA..... 37 19
.....TCGTGCAAGCTGTGTGCATC..... 6 21
.....CGTGCAAGCTGTGTGCAT..... 1 19

```

```

>ppt-miR537c_MIMAT0005067_Physcomitrella_patens_miR537c
TGATTGGAGCACCTCCAGATGTTCCAGATGTAATGAAACCGGTGCAAGCTCAAGCTCTGAGGTGTTTCTACAGGCTACATATGATAGATGGCTACCTGGATATACCAAGCTGGCTGTTGATTTTCATGTTTCAA
*****TTGAGGTGTTTCTACAGGCTA*****
ppt-miR537c 21
.....AACCGGTGCAAGCTCAAGCT..... 2 21
.....CTTCAAGCTCTTGAAGTGTTT..... 1 21
.....TTCAAGCTCTTGAAGTGTTTCT..... 51 22
.....TTCAAGCTCTTGAAGTGTTTCTAC..... 1 24
.....TTCAAGCTCTTGAAGTGTTTCT..... 170 21
.....TTCAAGCTCTTGAAGTGTTT..... 3 20
.....TCAAGCTCTTGAAGTGTTT..... 1 19
.....TCAAGCTCTTGAAGTGTTTCT..... 250 21
.....TCAAGCTCTTGAAGTGTTTCTA..... 1 22
.....TCAAGCTCTTGAAGTGTTTCTAC..... 1 23
.....TCAAGCTCTTGAAGTGTTTCT..... 3 20
.....AAGCTCTTGAAGTGTTTCT..... 7 19
.....CTTGAAGTGTTTCTACAGGCTAC..... 1 23
.....TTGAGGTGTTTCTACAGGCT..... 2 19
.....TTGAGGTGTTTCTACAGGCT..... 5 20
.....TTGAGGTGTTTCTACAGGCTA..... 26 21

```

```

>ppt-miR537d_MIMAT0005068_Physcomitrella_patens_miR537d
TTTATGAAAGTGACGAAATGTGTATGCTGTGATCGACGATTGGCGATGCTCATTTCCCTCTAGCTATGATGCAGATCTTCATCTGTTGAACGAAATTTCTTAGTGATGCAGACGAAGTCTGCATCATAGTCAAGGGGAGG
*****TTGAGGTGTTTCTACAGGCTA*****
.....ATCAGTAACCTTGAGGTGTT..... ppt-miR537d 21
.....ATCAGTAACCTTGAGGTGTTCT..... 1 19
.....TCAGTAACCTTGAGGTGTTCT..... 1 21
.....CTTGAGGTGTTTCTACAGGCTAC..... 1 23
.....TTGAGGTGTTTCTACAGGC..... 2 19
.....TTGAGGTGTTTCTACAGGCT..... 5 20
.....TTGAGGTGTTTCTACAGGCTA..... 26 21
.....TGAGGTGTTTCTACAGGCTACT..... 1 22

```

```

>ppt-miR902c-5p_MIMAT0005069_Physcomitrella_patens_miR902c-5p
TGTGTTTGCAGAAATGCTGTTGATGACTCTATTGGCGATGCTCATTTCCCTCTAGCTATGATGCAGATCTTCATCTGTTGAACGAAATTTCTTAGTGATGCAGACGAAGTCTGCATCATAGTCAAGGGGAGG
*****TATGATGCAGATCTTCATCT*****
.....TATGATGCAGATCTTCAT..... ppt-miR902c-5p 21
.....TATGATGCAGATCTTCATCTGTT..... 33 19
.....TATGATGCAGATCTTCATCTG..... 1 24
.....TATGATGCAGATCTTCATCTG..... 66 22
.....TATGATGCAGATCTTCATCT..... 413 21
.....TATGATGCAGATCTTCATCT..... 66 20
.....ATGATGCAGATCTTCATCT..... 8 20
.....ATGATGCAGATCTTCATCT..... 1 19
.....TGATGCAGATCTTCATCTG..... 1 20
.....AGCGAAGTCTGCATCATAG..... 3 21
.....AGCGAAGTCTGCATCATA..... 1 20
.....GACGAAGTCTGCATCATAG..... 1 20
.....ACGAAGTCTGCATCATAGT..... 100 20
.....ACGAAGTCTGCATCATAGTC..... 2 21
.....ACGAAGTCTGCATCATAG..... 5 19
.....ACGAAGTCTGCATCATAGCA..... 1 22
.....CGAAGTCTGCATCATAGT..... 4 19

```

```

>ppt-miR902e-5p_MIMAT0005073_Physcomitrella_patens_miR902e-5p
GTTGCAGACGTTTGTGGTGACGTTTGGACAGCGTCCGCTCTCATTTCCCTCTAGCTATGATGCAGATCTTCATCTGTTGCTGTGATGCTTGACAGAGTCTGCATCATAGTCAAGGGGAGG
*****TATGATGCAGATCTTCATCT*****
.....TCCGCTAGCTATGATGCAG..... ppt-miR902e-5p 21
.....TAGTCTATGATGCAGATCTTC..... 8 22
.....AGTCTATGATGCAGATCTTC..... 1 22
.....CTATGATGCAGATCTTCATCTG..... 1 23
.....CTATGATGCAGATCTTCATCT..... 1 20
.....CTATGATGCAGATCTTCATCT..... 1 22
.....TATGATGCAGATCTTCATCT..... 33 19
.....TATGATGCAGATCTTCATCTGTT..... 1 24
.....TATGATGCAGATCTTCATCTG..... 66 22
.....TATGATGCAGATCTTCATCT..... 413 21
.....TATGATGCAGATCTTCATCT..... 66 20
.....ATGATGCAGATCTTCATCT..... 8 20
.....ATGATGCAGATCTTCATCT..... 1 19
.....TGATGCAGATCTTCATCTG..... 1 20
.....AGCGAAGTCTGCATCATAG..... 3 21
.....AGCGAAGTCTGCATCATA..... 1 20
.....GACGAAGTCTGCATCATAG..... 1 20
.....ACGAAGTCTGCATCATAGT..... 100 20
.....ACGAAGTCTGCATCATAGTC..... 2 21
.....ACGAAGTCTGCATCATAG..... 5 19
.....ACGAAGTCTGCATCATAGCA..... 1 22
.....CGAAGTCTGCATCATAGT..... 4 19

```

```

>ppt-miR902g-5p_MIMAT0005077_Physcomitrella_patens_miR902g-5p
TGTGTTGTTTCAAGCGCTCTAGGTGGTAGCAGTTTGTTCATTTCCCTCTAGCTATGATGCAGATCTTCATCTGTTAGCTGAATCTGCTCAGTGTTCAGTGTACAGACGAAGTCTGCATCATAGTCAA
*****TATGATGCAGATCTTCATCT*****
.....TCCGCTAGCTATGATGCAG..... ppt-miR902g-5p 21
.....TAGTCTATGATGCAGATCTTC..... 8 22
.....AGTCTATGATGCAGATCTTC..... 1 22
.....CTATGATGCAGATCTTCATCTG..... 1 23
.....CTATGATGCAGATCTTCATCT..... 1 20
.....CTATGATGCAGATCTTCATCT..... 1 22
.....TATGATGCAGATCTTCATCT..... 33 19
.....TATGATGCAGATCTTCATCTGTT..... 1 24
.....TATGATGCAGATCTTCATCTG..... 66 22
.....TATGATGCAGATCTTCATCT..... 413 21
.....TATGATGCAGATCTTCATCT..... 66 20
.....ATGATGCAGATCTTCATCT..... 8 20
.....ATGATGCAGATCTTCATCT..... 1 19
.....TGATGCAGATCTTCATCTG..... 1 20
.....AGCGAAGTCTGCATCATAG..... 3 21
.....AGCGAAGTCTGCATCATA..... 1 20
.....GACGAAGTCTGCATCATAG..... 1 20
.....ACGAAGTCTGCATCATAGT..... 100 20
.....ACGAAGTCTGCATCATAGTC..... 2 21
.....ACGAAGTCTGCATCATAG..... 5 19
.....ACGAAGTCTGCATCATAGCA..... 1 22
.....CGAAGTCTGCATCATAGT..... 4 19

```

```

>ppt-miR902g-3p_MIMAT0005078_Physcomitrella_patens_miR902g-3p
TCTATGATGCAGATCTTCATCTGTTAGCTGAATCTGCTCAGTGTTCAGTGTACAGACGAAGTCTGCATCATAGTCAAGGAAATAACATTATAGATTATAGCAGCTCAATACCAACTTTGTCTAGGAA
*****ACGAAGTCTGCATCATAGT*****
.....CTATGATGCAGATCTTCATCTG..... ppt-miR902g-3p 20
.....CTATGATGCAGATCTTCATCT..... 1 23
.....CTATGATGCAGATCTTCATCT..... 1 20
.....TATGATGCAGATCTTCATCT..... 1 22
.....TATGATGCAGATCTTCATCT..... 33 19
.....TATGATGCAGATCTTCATCTGTT..... 1 24
.....TATGATGCAGATCTTCATCTG..... 66 22
.....TATGATGCAGATCTTCATCT..... 413 21
.....TATGATGCAGATCTTCATCT..... 66 20
.....ATGATGCAGATCTTCATCT..... 8 20
.....ATGATGCAGATCTTCATCT..... 8 20
.....ATGATGCAGATCTTCATCT..... 1 19

```

```

....TGATGCAGATTCCTCATCTG..... 1 20
.....AGACGAAGGCTGCATCATAG..... 3 21
.....AGACGAAGGCTGCATCATAG..... 1 20
.....GACGAAGGCTGCATCATAG..... 1 20
.....ACGAAGGCTGCATCATAGT..... 100 20
.....ACGAAGGCTGCATCATAGTC..... 2 21
.....ACGAAGGCTGCATCATAG..... 5 19
.....ACGAAGGCTGCATCATAGTCA..... 1 22
.....CGAAGGCTGCATCATAGT..... 4 19

```

```

>ppt-miR902h-5p_MIMAT0005079_Physcomitrella_patens_miR902h-5p
TTCAGTGTAGGTACCGAGTGACATCTCCGACCAACCACAAAATCGTGTGATCTAGATTATGATAGATTCTTCTATCGGAATGAATTCGATTAAAGAAGGGGTCTACATCATAAACTGGATGATTACGATT
*****TTATGATGTAGATTCTTCAT***** ppt-miR902h-5p 20
.....TCTAGATTATGATGTAGATT..... 1 20
.....TAGATTATGATGTAGATTCTT..... 2 21
.....TAGATTATGATGTAGATTCT..... 1 20
.....TTATGATGTAGATTCTTCATCTG..... 1 23
.....TTATGATGTAGATTCTTCAT..... 81 20
.....TTATGATGTAGATTCTTCATC..... 162 21
.....TTATGATGTAGATTCTTCATCTGG..... 1 24
.....TATGATGTAGATTCTTCATCT..... 1 21
.....TATGATGTAGATTCTTCAT..... 45 19
.....TATGATGTAGATTCTTCATC..... 63 20
.....ATGATGTAGATTCTTCATC..... 5 19
.....ATGATGTAGATTCTTCATCTGGAA..... 1 24
.....TGATGTAGATTCTTCATCTGG..... 1 21
.....TGATGTAGATTCTTCATCT..... 1 19
.....TGATGTAGATTCTTCATCTGGAAT..... 1 24
.....AGAAGAAGGGTCTACATCATAAAC..... 1 24
.....AGAAGGGTCTACATCATAAACT..... 2 22
.....AGAAGGGTCTACATCATAAAC..... 11 21
.....AGAAGGGTCTACATCATAAA..... 4 20

```

```

>ppt-miR902h-3p_MIMAT0005080_Physcomitrella_patens_miR902h-3p
ATCGTGTGATCTAGATTATGATGTAGATTCTTCATCTGGAATGAATTCGATTAAAGAAGGGGTCTACATCATAAACTGGATGATTACGATTGTTGGATAACAGCAGCACCTACGCTTCTAAATTTGCAGTAGGT
*****AGAAGGGTCTACATCATAAAC***** ppt-miR902h-3p 21
.....TCTAGATTATGATGTAGATT..... 1 20
.....TAGATTATGATGTAGATTCTT..... 2 21
.....TAGATTATGATGTAGATTCT..... 1 20
.....TTATGATGTAGATTCTTCATCTG..... 1 23
.....TTATGATGTAGATTCTTCAT..... 81 20
.....TTATGATGTAGATTCTTCATC..... 162 21
.....TTATGATGTAGATTCTTCATCTGG..... 1 24
.....TATGATGTAGATTCTTCATCT..... 1 21
.....TATGATGTAGATTCTTCAT..... 45 19
.....TATGATGTAGATTCTTCATC..... 63 20
.....ATGATGTAGATTCTTCATC..... 5 19
.....ATGATGTAGATTCTTCATCTGGAA..... 1 24
.....TGATGTAGATTCTTCATCTGG..... 1 21
.....TGATGTAGATTCTTCATCT..... 1 19
.....TGATGTAGATTCTTCATCTGGAAT..... 1 24
.....AGAAGAAGGGTCTACATCATAAAC..... 1 24
.....AGAAGGGTCTACATCATAAACT..... 2 22
.....AGAAGGGTCTACATCATAAAC..... 11 21
.....AGAAGGGTCTACATCATAAA..... 4 20

```

```

>ppt-miR1023a-5p_MIMAT0005102_Physcomitrella_patens_miR1023a-5p
GGAGGAGGTGGCCTTGGGGGTTGACGAGGGAGCGATTGGACCACCTTGCAGTTTCATGGCACACTCTCCATTTCTACCGTTCATCGAGCGGTTGATCGATTGGTTGCTGGTTGATTGATCGATCGATGGTCAGGAG
*****ACACTCTCCATTTCTCTAC***** ppt-miR1023a-5p 21
.....CACTCTCCATTTCTCTAC..... 1 23
.....CACTCTCCATTTCTCTA..... 69 20
.....CACTCTCCATTTCTCTACC..... 59 22
.....CACTCTCCATTTCTCTAC..... 1595 21
.....CACTCTCCATTTCTCT..... 24 19
.....CACTCTCCATTTCTCTAC..... 7 20
.....ACTCTCCATTTCTCTAC..... 3 19
.....ACTCTCCATTTCTCTACGGT..... 1 23

```

```

>ppt-miR1023a-3p_MIMAT0005103_Physcomitrella_patens_miR1023a-3p
ATGCAGCGGTTGATCGATTGGGTGCTGCTGTTGATTGATCGATGATGTCAGGAGTTGGAAGAATGGAGAGAGTGCATTTGGAATGCGGGGTTGACGAGCGGAGGGGTTCTGGAGTTAGTCGCAGTTTCCACCCAC
*****AGAATTTGGAGAGAGTGCAT***** ppt-miR1023a-3p 21
.....GGAAGAATTTGGAGAGAGTGCAT..... 1 24
.....GAAGAATTTGGAGAGAGTGCAT..... 4 23
.....GAAGAATTTGGAGAGAGTGCAT..... 1 22
.....AAGAATTTGGAGAGAGTGCAT..... 27 22
.....AAGAATTTGGAGAGAGTGCAT..... 3 23
.....AAGAATTTGGAGAGAGTGCAT..... 25 21
.....AGAATTTGGAGAGAGTGCAT..... 10 19
.....AGAATTTGGAGAGAGTGCAT..... 807 20
.....AGAATTTGGAGAGAGTGCAT..... 3022 21
.....AGAATTTGGAGAGAGTGCAT..... 121 22
.....GAGAATTTGGAGAGAGTGCAT..... 17 19
.....GAGAATTTGGAGAGAGTGCAT..... 1 21
.....GAGAATTTGGAGAGAGTGCAT..... 44 20
.....AGAATTTGGAGAGAGTGCAT..... 2 20
.....AGAATTTGGAGAGAGTGCAT..... 23 19

```

```

>ppt-miR1025_MIMAT0005111_Physcomitrella_patens_miR1025
TCTACCCACTCCGCTTCCCTGCTGTTGTGCGAGTGGGGGCTCGCCTGCTCTCTCTCCACACAACAAAGCTAAATAACTGACTCCTCTGACACACGCTCTGCTGCTGTTTCCGCGGTTGCGTTTGGCTGCTGC
*****TCCACACAACAAAGCTAAATAACTGACTCCTCTGACACACGCTCTGCTGCTGTTTCCGCGGTTGCGTTTGGCTGCTGC***** ppt-miR1025 21
.....CTTCTCTGCCACAACAAG..... 1 20
.....TTCTCTGCCACAACAAGC..... 13 21
.....TTCTCTGCCACAACAAG..... 240 20
.....TTCTCTGCCACAACAAG..... 18 19
.....TCTCTGCCACAACAAG..... 3 19
.....CTTCTGCCACAACAAGCTAAATA..... 1 24
.....CTTCTGCCACAACAAGCTAA..... 1 21
.....CTTCTGCCACAACAAGCTAA..... 1 23

```

```

.....TTCTGCCACAACAAGCTAATAA..... 2 23
.....TTCTGCCACAACAAGCTAA..... 1 20
.....TCTGCCACAACAAGCTAATAAC..... 2 23
.....CTGCCACAACAAGCTAATAAC..... 6 22
.....TGCCACAACAAGCTAATA..... 42 19
.....TGCCACAACAAGCTAATAA..... 31 20
.....TGCCACAACAAGCTAATAAC..... 928 21
.....TGCCACAACAAGCTAATAACT..... 8 22
.....GCCACAACAAGCTAATAAC..... 9 20
.....CCACAACAAGCTAATAAC..... 6 19
.....CACACAAGCTAATAACT..... 1 19
.....CAACAAGCTAATAACTCGAC..... 8 21
.....AACACAAGCTAATAACTCGAC..... 1 20
.....AACACAAGCTAATAACTCGACT..... 3 21

```

```

>ppt-miR1026b_MIMAT0005113_Physcomitrella_patens_miR1026b
CAATGATATGTGCATTCTCATATTCGAACTCAGGAACATAATTGAGACTCTCTGAACTCTGAGAAAGACTTGAGAGGACCTCTGCAACAACCTGTGGCAATTCATGCAGTTATAGCAGCATCTGCAGCGCGGTTCTC
*****TGAGAAAGACTTGAGAGGACA***** ppt-miR1026b 21
.....CTCTGAGAAAGACTTGAGAGGAC..... 1 23
.....TGAGAAAGACTTGAGAGGA..... 4 19
.....TGAGAAAGACTTGAGAGGAC..... 12 20
.....TGAGAAAGACTTGAGAGGACA..... 161 21
.....TGAGAAAGACTTGAGAGGAC..... 2 22
.....GAGAAAGACTTGAGAGGACA..... 1 20

```

```

>ppt-miR1027a_MIMAT0005114_Physcomitrella_patens_miR1027a
CGCTAGTGGAAATTTGGGAGAGCAGAAGTCAAGAGCAGATACTTAAGTCGAAGAGCATCTTCTATCTCTCTCCAATCTATTGATCGCCCTCCAATCTATCAGATCAATAGATTGGAAGAGCAGATCGAAAAATG
*****TTTCTATCTCTCTCCAATC***** ppt-miR1027a 21
.....CTTCTATCTCTCTCCAAT..... 1 21
.....TTTCTATCTCTCTCCAATC..... 70 21
.....TTTCTATCTCTCTCCAAT..... 3 20
.....TTCTATCTCTCTCCAAT..... 2 19
.....TTCTATCTCTCTCCAAT..... 10 21
.....TTCTATCTCTCTCCAATCT..... 1 20
.....TTCTATCTCTCTCCAATCTAT..... 1 23
.....TTCTATCTCTCTCCAATCTA..... 1 22
.....TCTATCTCTCTCCAATCTAT..... 2 22
.....TCTATCTCTCTCCAATCTA..... 28 21
.....TCTATCTCTCTCCAATCT..... 2 20
.....TATCTCTCTCTCCAATCTAT..... 1 20
.....TTCTCTCCAATCTATTGATC..... 2 21
.....TTCTCTCCAATCTATTGAT..... 1 20
.....TCTCTCCAATCTATTGAT..... 1 19
.....TCTCTCCAATCTATTGATCT..... 2 21
.....TCTCTCCAATCTATTGATCTGCC..... 2 24
.....TCTCTCCAATCTATTGATCTGC..... 2 21
.....TCAGATCAATAGATTGGAAGA..... 1 21
.....AGATCAATAGATTGGAAGAGC..... 1 21
.....ATAGATTGGAAGAGCAGATCGAAA..... 1 24
.....AGATTGGAAGAGCAGATCGAAAAA..... 1 24
.....AGATTGGAAGAGCAGATCGAAA..... 1 22
.....AGATTGGAAGAGCAGATCGAA..... 1 21
.....GATTGGAAGAGCAGATCGAAA..... 1 21
.....ATTGGAAGAGCAGATCGAAAA..... 2 21
.....TTGGAAGAGCAGATCGAAA..... 14 20
.....TTGGAAGAGCAGATCGAAA..... 5 19
.....TTGGAAGAGCAGATCGAAAAA..... 190 21
.....TTGGAAGAGCAGATCGAAAAAT..... 2 22
.....TGGAAAGAGCAGATCGAAAAAT..... 2 21

```

```

>ppt-miR1027b_MIMAT0005115_Physcomitrella_patens_miR1027b
CGCTAGTGGAAATTTGGGAGAGCAGAAGTCAAGAGCAGATACTTAAGTCGAAGAGCATCTTCTATCTCTCTCCAATCTATTGATCGCCCTCCAATCTATCAGATCAATAGATTGGAAGAGCAGATCGAAAAATG
*****TTTCTATCTCTCTCCAATC***** ppt-miR1027b 21
.....CTTCTATCTCTCTCCAAT..... 1 21
.....TTTCTATCTCTCTCCAATC..... 70 21
.....TTTCTATCTCTCTCCAAT..... 3 20
.....TTCTATCTCTCTCCAAT..... 2 19
.....TTCTATCTCTCTCCAATCT..... 10 21
.....TTCTATCTCTCTCCAATC..... 1 20
.....TTCTATCTCTCTCCAATCTAT..... 1 23
.....TTCTATCTCTCTCCAATCTA..... 1 22
.....TCTATCTCTCTCCAATCTAT..... 2 22
.....TCTATCTCTCTCCAATCTA..... 28 21
.....TCTATCTCTCTCCAATCT..... 2 20
.....TATCTCTCTCTCCAATCTAT..... 1 20
.....TTCTCTCCAATCTATTGATC..... 2 21
.....TTCTCTCCAATCTATTGAT..... 1 20
.....TCTCTCCAATCTATTGAT..... 1 19
.....TCTCTCCAATCTATTGATCT..... 2 21
.....TCTCTCCAATCTATTGATCTGCC..... 2 24
.....TCTCTCCAATCTATTGATCTGC..... 2 21
.....TCAGATCAATAGATTGGAAGA..... 1 21
.....AGATCAATAGATTGGAAGAGC..... 1 21
.....ATAGATTGGAAGAGCAGATCGAAA..... 1 24
.....AGATTGGAAGAGCAGATCGAAAAA..... 1 24
.....AGATTGGAAGAGCAGATCGAAA..... 1 22
.....AGATTGGAAGAGCAGATCGAA..... 1 21
.....GATTGGAAGAGCAGATCGAAA..... 1 21
.....ATTGGAAGAGCAGATCGAAAA..... 2 21
.....TTGGAAGAGCAGATCGAAA..... 14 20
.....TTGGAAGAGCAGATCGAAA..... 5 19
.....TTGGAAGAGCAGATCGAAAAA..... 190 21
.....TTGGAAGAGCAGATCGAAAAAT..... 2 22
.....TGGAAAGAGCAGATCGAAAAAT..... 2 21

```

```

>ppt-miR1030a_MIMAT0005123_Physcomitrella_patens_miR1030a
AATAGTATCTCTGAAATAGATGACAGCAAGTACGCAATTAAGCTGCACCGTCAACATTTCTGCATCTGCACCTGCACCAAAACCGCACTTTGAGGTTGTGGAATTCGCACTCACACCCAGCATTTCGAAGAGTG
*****TCTGCATCTGCACCTGCACCA***** ppt-miR1030a 21
.....TCTGCATCTGCACCTGCACCA..... 31 21

```

```

.....TCTGCATCTGCACCTGCACCAA..... 1 23
.....TCTGCATCTGCACCTGCACC..... 1 20
.....TCTGCATCTGCACCTGCACC..... 1 19
.....TCTGCATCTGCACCTGCACCAA..... 1 22
.....CTGCATCTGCACCTGCACCAA..... 1 20
.....TGCATCTGCACCTGCACCAA..... 1 19

```

```

>ppt-miR1030f_MIMAT0005128_Physcomitrella_patens_miR1030f
CAGTGATTTACACTTGTTCATTGGCACTACCTCTACATACTCTCAATGCCACGTATCTGCATCTGCACCTGCACCAAAGTTTGAATTTACCGCTCGTGTAGTCTGTTGTTGGAAGTGGGATGAGTGG
*****TCTGCATCTGCACCTGCACCAA***** ppt-miR1030f 21
.....TCTGCATCTGCACCTGCACCAA..... 31 21
.....TCTGCATCTGCACCTGCACCAA..... 1 23
.....TCTGCATCTGCACCTGCACC..... 1 20
.....TCTGCATCTGCACCTGCACC..... 1 19
.....TCTGCATCTGCACCTGCACCAA..... 1 22
.....CTGCATCTGCACCTGCACCAA..... 1 20
.....TGCATCTGCACCTGCACCAA..... 1 19

```

```

>ppt-miR1030g_MIMAT0005129_Physcomitrella_patens_miR1030g
CGTGAATTTACACTTGTCCATTTGCCCTACCTCGATTACTGCTCAATGCCACGTATCTGCATCTGCACCTGCACCAAAGTTTGAATTTGAAAGTCTAATGTAATGATGACACTTTTTGTACCCAAAGTGGG
*****TCTGCATCTGCACCTGCACCAA***** ppt-miR1030g 21
.....TCTGCATCTGCACCTGCACCAA..... 31 21
.....TCTGCATCTGCACCTGCACCAA..... 1 23
.....TCTGCATCTGCACCTGCACC..... 1 20
.....TCTGCATCTGCACCTGCACC..... 1 19
.....TCTGCATCTGCACCTGCACCAA..... 1 22
.....CTGCATCTGCACCTGCACCAA..... 1 20
.....TGCATCTGCACCTGCACCAA..... 1 19

```

```

>ppt-miR1031a_MIMAT0005133_Physcomitrella_patens_miR1031a
TGATCCAGCTACACTGAAGACACTGATAGACCTGCGAAATTTCTGGATCATAAATTTGCTCAATGCTCTGGAGCTTCTGTGTACCACGTTGGAGAGGTTGATTTGGACTCCCTGATAGGGCTTAGGCATCTTC
*****TCAATGCTCTGGAGCTTCT***** ppt-miR1031a 21
.....TCAATGCTCTGGAGCTTCT..... 438 21
.....TCAATGCTCTGGAGCTTCTGTG..... 1 24
.....TCAATGCTCTGGAGCTTCT..... 4 19
.....TCAATGCTCTGGAGCTTCTG..... 2 22
.....TCAATGCTCTGGAGCTTCT..... 5 20
.....CAATGCTCTGGAGCTTCT..... 4 20
.....AATGCTCTGGAGCTTCT..... 8 19
.....ATGCTCTGGAGCTTCTGT..... 1 20

```

```

>ppt-miR1031b_MIMAT0005134_Physcomitrella_patens_miR1031b
CAATGAACGGCCATTGATTCCTGATCGGACGGCGGAAGTTCTGGATCACAATTTGCTCAATGCTCTGGAGCTTCTGTGCCGTTGTTGGGAGTGGGTTGTCCCTGGACAGGTGCGAGAACCTGACGG
*****TCAATGCTCTGGAGCTTCT***** ppt-miR1031b 21
.....TCAATGCTCTGGAGCTTCT..... 438 21
.....TCAATGCTCTGGAGCTTCTGTG..... 1 24
.....TCAATGCTCTGGAGCTTCT..... 4 19
.....TCAATGCTCTGGAGCTTCTG..... 2 22
.....TCAATGCTCTGGAGCTTCT..... 5 20
.....CAATGCTCTGGAGCTTCT..... 4 20
.....AATGCTCTGGAGCTTCT..... 8 19
.....ATGCTCTGGAGCTTCTGT..... 1 20

```

```

>ppt-miR1033a_MIMAT0005136_Physcomitrella_patens_miR1033a
TACAATCCGGCGGTCATTGGGAATGTCATCACAACTGGCAACATTCAGGTTATGTTGACGGGCTGTGATGGGCCTCTCAGCTCTCATGTACAAAAACGCAGACATCTCACTCCGTACCACACAGTCTGAA
*****TGACGGGCTGTGATGGGCCT***** ppt-miR1033a 21
.....TGGCATTGGGAATGTCATC..... 1 20
.....ATGTCCATCACAACTGGCAAC..... 4 22
.....ATGTCCATCACAACTGGCA..... 2 20
.....ATGTCCATCACAACTGGCAA..... 2 21
.....GTTGACGGGCTGTGATGGGCCT..... 1 23
.....TTGACGGGCTGTGATGGGCCT..... 1 22
.....TGACGGGCTGTGATGGGCCT..... 148 21
.....TGACGGGCTGTGATGGGCCTCT..... 4 23
.....TGACGGGCTGTGATGGGCCTC..... 62 22
.....GACGGGCTGTGATGGGCCT..... 36 20
.....GACGGGCTGTGATGGGCCTC..... 35 21
.....GACGGGCTGTGATGGGCCTCT..... 1 22
.....ACGGGCTGTGATGGGCCTC..... 8 20
.....ACGGGCTGTGATGGGCCT..... 1 19
.....ATGGGCCTCTCAGCTCTCA..... 1 21

```

```

>ppt-miR1033b_MIMAT0005137_Physcomitrella_patens_miR1033b
GATGGAGATGATGGGATGTTGGGATGCTCAACACGATCTGTCAACATTTAGAGTATATTGACGGGCTGTGATGGGCCTCTCAATGCCACTTATGTTTGTGACGCTGACCCAGCTGTGAAATGATGACGATGGA
*****TGACGGGCTGTGATGGGCCT***** ppt-miR1033b 21
.....TGGGATGTTGGGATGCTCAAC..... 1 22
.....ATGCTCAACACGATCTGTCAACA..... 9 23
.....ATGCTCAACACGATCTGTCA..... 1 20
.....ATGCTCAACACGATCTGTCAAC..... 9 22
.....ATGCTCAACACGATCTGTCA..... 3 21
.....TGCTCAACACGATCTGTCAAC..... 21 21
.....TGCTCAACACGATCTGTCA..... 1 19
.....TGCTCAACACGATCTGTCA..... 7 20
.....TGCTCAACACGATCTGTCAACAT..... 4 23
.....TGCTCAACACGATCTGTCAACA..... 2 22
.....TGCTCAACACGATCTGTCAACATT..... 1 24
.....GCTCAACACGATCTGTCAAC..... 1 20
.....GCTCAACACGATCTGTCAACATT..... 1 23
.....ATTGACGGGCTGTGATGGGCCT..... 4 23
.....TTGACGGGCTGTGATGGGCCT..... 1 22
.....TGACGGGCTGTGATGGGCCT..... 148 21
.....TGACGGGCTGTGATGGGCCTCT..... 4 23
.....TGACGGGCTGTGATGGGCCTC..... 62 22
.....GACGGGCTGTGATGGGCCT..... 36 20
.....GACGGGCTGTGATGGGCCTC..... 35 21
.....GACGGGCTGTGATGGGCCTCT..... 1 22
.....ACGGGCTGTGATGGGCCT..... 8 20

```

|                                                                                                                                             |                |    |
|---------------------------------------------------------------------------------------------------------------------------------------------|----------------|----|
| .....ACGGGCTGTATGGGCACT.....                                                                                                                | 1              | 19 |
| <p>&gt;ppt-miR1033c_MIMAT0005138_Physcomitrella_patens_miR1033c</p>                                                                         |                |    |
| GATGGAAATGATGGGATGTTGGGATGCCCAACACGATCTGTCAACATTCTATGTTATATTGACGGGCTGTATGGGCACTCTCAATGTCACCTTCATGATAATAAAGCTTTTATGTGACATTGCAGCAGCAGATGA     | ppt-miR1033c   | 21 |
| *****TGACGGGCTGTATGGGCACT*****                                                                                                              |                |    |
| .....TGCCCAACACGATCTGTCAAC.....                                                                                                             | 2              | 21 |
| .....ATTGACGGGCTGTATGGGCACT.....                                                                                                            | 4              | 23 |
| .....TTGACGGGCTGTATGGGCACT.....                                                                                                             | 1              | 22 |
| .....TGACGGGCTGTATGGGCACT.....                                                                                                              | 148            | 21 |
| .....TGACGGGCTGTATGGGCACTCT.....                                                                                                            | 4              | 23 |
| .....TGACGGGCTGTATGGGCACTC.....                                                                                                             | 62             | 22 |
| .....GACGGGCTGTATGGGCACT.....                                                                                                               | 36             | 20 |
| .....GACGGGCTGTATGGGCACTC.....                                                                                                              | 35             | 21 |
| .....GACGGGCTGTATGGGCACTCT.....                                                                                                             | 1              | 22 |
| .....ACGGGCTGTATGGGCACTC.....                                                                                                               | 8              | 20 |
| .....ACGGGCTGTATGGGCACT.....                                                                                                                | 1              | 19 |
| <p>&gt;ppt-miR1033d_MIMAT0005139_Physcomitrella_patens_miR1033d</p>                                                                         |                |    |
| ACAAGGCTGGCAGTGCATTGGGAATGTCACGACGATCTGTCAACATTCAGGTTATGTTGACGGGCTGTATGGGCACTCTCACTGCTCATGCTGATGATTCTGGGTGCTTACGTTGTGGTCTACTCCGAGA          | ppt-miR1033d   | 21 |
| *****TGACGGGCTGTATGGGCACT*****                                                                                                              |                |    |
| .....ATGTCATGACGATCTGTCAAC.....                                                                                                             | 11             | 22 |
| .....ATGTCATGACGATCTGTCAA.....                                                                                                              | 25             | 21 |
| .....GTTGACGGGCTGTATGGGCACT.....                                                                                                            | 1              | 23 |
| .....TTGACGGGCTGTATGGGCACT.....                                                                                                             | 1              | 22 |
| .....TGACGGGCTGTATGGGCACT.....                                                                                                              | 148            | 21 |
| .....TGACGGGCTGTATGGGCACTCT.....                                                                                                            | 4              | 23 |
| .....TGACGGGCTGTATGGGCACTC.....                                                                                                             | 62             | 22 |
| .....GACGGGCTGTATGGGCACT.....                                                                                                               | 36             | 20 |
| .....GACGGGCTGTATGGGCACTC.....                                                                                                              | 35             | 21 |
| .....GACGGGCTGTATGGGCACTCT.....                                                                                                             | 1              | 22 |
| .....ACGGGCTGTATGGGCACTC.....                                                                                                               | 8              | 20 |
| .....ACGGGCTGTATGGGCACT.....                                                                                                                | 1              | 19 |
| <p>&gt;ppt-miR1033e_MIMAT0005140_Physcomitrella_patens_miR1033e</p>                                                                         |                |    |
| TAAACATTCGGCAGGGGTTGGGAATGTCACGACAACTGTCAACATTCAGGTTATGTTGACGGGCTGTATGGGCACTCTCAGGCTCCATGCCAACTGCACATCAGCTTCAAGAAACACACACTCCGGAGAA          | ppt-miR1033e   | 21 |
| *****TGACGGGCTGTATGGGCACT*****                                                                                                              |                |    |
| .....GTTGACGGGCTGTATGGGCACT.....                                                                                                            | 1              | 23 |
| .....TTGACGGGCTGTATGGGCACT.....                                                                                                             | 1              | 22 |
| .....TGACGGGCTGTATGGGCACT.....                                                                                                              | 148            | 21 |
| .....TGACGGGCTGTATGGGCACTCT.....                                                                                                            | 4              | 23 |
| .....TGACGGGCTGTATGGGCACTC.....                                                                                                             | 62             | 22 |
| .....GACGGGCTGTATGGGCACT.....                                                                                                               | 36             | 20 |
| .....GACGGGCTGTATGGGCACTC.....                                                                                                              | 35             | 21 |
| .....GACGGGCTGTATGGGCACTCT.....                                                                                                             | 1              | 22 |
| .....ACGGGCTGTATGGGCACTC.....                                                                                                               | 8              | 20 |
| .....ACGGGCTGTATGGGCACT.....                                                                                                                | 1              | 19 |
| <p>&gt;ppt-miR1039-5p_MIMAT0005148_Physcomitrella_patens_miR1039-5p</p>                                                                     |                |    |
| AGTAACCTGCTCCGCGCAGCTGCTCAGCAGGACTTATTGTGTACGCCACATAGGGTCTTTGGGCTTTCTCTCTGAAATGTTAAGAGCTTGAGCGCTAAATTTTCAGGGGAGACGGGCTCAAGGATCTTGAAG        | ppt-miR1039-5p | 21 |
| *****TCTTTGGGCTTTCTCTCTG*****                                                                                                               |                |    |
| .....TTAGGGCTTTGGGCTTTCT.....                                                                                                               | 1              | 21 |
| .....TAGGGCTTTGGGCTTTCTC.....                                                                                                               | 3              | 21 |
| .....TAGGGCTTTGGGCTTTCT.....                                                                                                                | 1              | 20 |
| .....TCTTTGGGCTTTCTCTCTGAA.....                                                                                                             | 2              | 23 |
| .....TCTTTGGGCTTTCTCTCTGAAA.....                                                                                                            | 3              | 24 |
| .....TCTTTGGGCTTTCTCTCTC.....                                                                                                               | 1              | 20 |
| .....TCTTTGGGCTTTCTCTCTCG.....                                                                                                              | 19             | 21 |
| .....TCTTTGGGCTTTCTCTCTGA.....                                                                                                              | 6              | 22 |
| .....CTTTGGGCTTTCTCTCTCG.....                                                                                                               | 1              | 20 |
| .....AGGGGAGACGGGCTCAAGGATC.....                                                                                                            | 1              | 22 |
| .....GGGGAGACGGGCTCAAGGATC.....                                                                                                             | 30             | 21 |
| .....GGGGAGACGGGCTCAAGGATCT.....                                                                                                            | 1              | 22 |
| .....GGGGAGACGGGCTCAAGGAT.....                                                                                                              | 2              | 20 |
| .....GGGGAGACGGGCTCAAGGATC.....                                                                                                             | 1              | 20 |
| .....AGACGGGCTCAAGGATCTTGA.....                                                                                                             | 1              | 21 |
| <p>&gt;ppt-miR1039-3p_MIMAT0005149_Physcomitrella_patens_miR1039-3p</p>                                                                     |                |    |
| TTAGGGCTTTGGGCTTTCTCTCTGAAATGTTAAGAGCTTGAGCGCTTAAATTTTCAGGGGAGACGGGCTCAAGGATCTTGAAGTGGTGCCTGGGATGATAATACAGCGCTACATTTACAATATTCAACTTCACTC     | ppt-miR1039-3p | 21 |
| *****GGGGAGACGGGCTCAAGGATC*****                                                                                                             |                |    |
| .....TTAGGGCTTTGGGCTTTCT.....                                                                                                               | 1              | 21 |
| .....TAGGGCTTTGGGCTTTCTC.....                                                                                                               | 3              | 21 |
| .....TAGGGCTTTGGGCTTTCT.....                                                                                                                | 1              | 20 |
| .....TCTTTGGGCTTTCTCTCTGAA.....                                                                                                             | 2              | 23 |
| .....TCTTTGGGCTTTCTCTCTGAAA.....                                                                                                            | 3              | 24 |
| .....TCTTTGGGCTTTCTCTCTC.....                                                                                                               | 1              | 20 |
| .....TCTTTGGGCTTTCTCTCTCG.....                                                                                                              | 19             | 21 |
| .....TCTTTGGGCTTTCTCTCTGA.....                                                                                                              | 6              | 22 |
| .....CTTTGGGCTTTCTCTCTCG.....                                                                                                               | 1              | 20 |
| .....AGGGGAGACGGGCTCAAGGATC.....                                                                                                            | 1              | 22 |
| .....GGGGAGACGGGCTCAAGGATC.....                                                                                                             | 30             | 21 |
| .....GGGGAGACGGGCTCAAGGATCT.....                                                                                                            | 1              | 22 |
| .....GGGGAGACGGGCTCAAGGAT.....                                                                                                              | 2              | 20 |
| .....GGGGAGACGGGCTCAAGGATC.....                                                                                                             | 1              | 20 |
| .....AGACGGGCTCAAGGATCTTGA.....                                                                                                             | 1              | 21 |
| <p>&gt;ppt-miR1043-5p_MIMAT0005154_Physcomitrella_patens_miR1043-5p</p>                                                                     |                |    |
| AGTACGCTAGTGGATGCTTCAACGTGAGAAGATTTAAGAGCTTGAGCGCTTAAATTTTCAGGGGAGACGGGCTCAAGGATCTTGAAGTGGTGCCTGGGATGATAATACAGCGCTACATTTACAATATTCAACTTCACTC | ppt-miR1043-5p | 20 |
| *****CTTCAACTTCATCGCTGCA*****                                                                                                               |                |    |
| .....CGGTTGGAGGCTTCAACTTC.....                                                                                                              | 2              | 21 |
| .....CGGTTGGAGGCTTCAACTTCA.....                                                                                                             | 1              | 22 |
| .....CGGTTGGAGGCTTCAACTTCATG.....                                                                                                           | 1              | 24 |
| .....GAGGCCTTCAACTTCATCGG.....                                                                                                              | 2              | 20 |
| .....GAGGCCTTCAACTTCATCG.....                                                                                                               | 1              | 19 |
| .....GAGGCCTTCAACTTCATCGCT.....                                                                                                             | 1              | 21 |
| .....AGGCCTTCAACTTCATCGCTGCA.....                                                                                                           | 1              | 23 |
| .....CCTTCAACTTCATCGCTGCAAA.....                                                                                                            | 1              | 22 |
| .....CCTTCAACTTCATCGCTGCAA.....                                                                                                             | 15             | 21 |

```

.....CCTTCAACTTCATCGGTGCA..... 36 20
.....CTTCAACTTCATCGGTGCAAA..... 1 22
.....CTTCAACTTCATCGGTGCAAA..... 20 21
.....CTTCAACTTCATCGGTGCA..... 45 19
.....CTTCAACTTCATCGGTGCA..... 14 20
.....ACCTGAATGATTGGATGGATT..... 5 23
.....ACCTGAATGATTGGATGGATT..... 24 24
.....ACCTGAATGATTGGATGGAT..... 3 22
.....CCCTGAATGATTGGATGGAT..... 4 21
.....CCCTGAATGATTGGATGGATT..... 43 22
.....CCCTGAATGATTGGATGGATT..... 1 23
.....TTTTGCGCGTGAATTTGAAGGCT..... 1 24
.....TTTTGCGCGTGAATTTGAAGGCT..... 1 23
.....TTTTGCGCGTGAATTTGAAGGC..... 863 21
.....TTTTGCGCGTGAATTTGAAGG..... 52 20
.....TTTTGCGCGTGAATTTGAAGCT..... 8 22
.....TTTTGCGCGTGAATTTGAAG..... 61 19
.....TTGCGCGTGAATTTGAAGCT..... 1093 21
.....TTGCGCGTGAATTTGAAGC..... 28 20
.....TTGCGCGTGAATTTGAAGCTCCC..... 2 24
.....TTGCGCGTGAATTTGAAGG..... 24 19
.....TTGCGCGTGAATTTGAAGCTCC..... 4 23
.....TTGCGCGTGAATTTGAAGGCTC..... 12 22
.....TGCGCGTGAATTTGAAGGCT..... 14 20
.....TGCGCGTGAATTTGAAGGC..... 1 19
.....TGCGCGTGAATTTGAAGCTCC..... 2 22
.....GCGCGTGAATTTGAAGCT..... 3 19
.....CGCGTGAATTTGAAGCTCC..... 1 20
.....CGTGAATTTGAAGGCTCCCA..... 1 21
.....CGTGAATTTGAAGGCTCCC..... 1 20
.....CGTGAATTTGAAGGCTCCCA..... 1 20
.....CGTGAATTTGAAGGCTCCCAT..... 2 21
.....CGTGAATTTGAAGGCTCCC..... 1 19
.....AATTTGAAGGCTCCCATTCGTT..... 1 22

```

```

>ppt-miR1043-3p_MIMAT0005155_Physcomitrella_patens_miR1043-3p
GGAAACGGTTGGAGGCTTCAACTTCATCGGTGCAAACTGAAATGATTGGATGGATTTTTCGCGTGAATTTGAAGGCTCCCATCTGCTAGCATGAAGAATAAGAGACCAGCAACACTCAAAAGGATACCAAGTT
*****TTGCGCGTGAATTTGAAGGCT*****
.....CGTTGGAGGCTTCAACTTC..... ppt-miR1043-3p 21
.....CGTTGGAGGCTTCAACTTCA..... 2 21
.....CGTTGGAGGCTTCAACTTCATG..... 1 22
.....GAGGCTTCAACTTCATGCG..... 1 24
.....GAGGCTTCAACTTCATGC..... 2 20
.....GAGGCTTCAACTTCATCG..... 1 19
.....AGGCTTCAACTTCATCGGTGCA..... 1 21
.....CCTTCAACTTCATCGGTGCAAA..... 1 23
.....CCTTCAACTTCATCGGTGCA..... 1 22
.....CCTTCAACTTCATCGGTGCA..... 15 21
.....CCTTCAACTTCATCGGTGCA..... 36 20
.....CTTCAACTTCATCGGTGCAAA..... 1 22
.....CTTCAACTTCATCGGTGCAAA..... 20 21
.....CTTCAACTTCATCGGTGCA..... 45 19
.....CTTCAACTTCATCGGTGCA..... 14 20
.....ACCTGAATGATTGGATGGATT..... 5 23
.....ACCTGAATGATTGGATGGATT..... 24 24
.....ACCTGAATGATTGGATGGAT..... 3 22
.....CCCTGAATGATTGGATGGAT..... 4 21
.....CCCTGAATGATTGGATGGATT..... 43 22
.....CCCTGAATGATTGGATGGATT..... 1 23
.....TTTTGCGCGTGAATTTGAAGGCT..... 1 24
.....TTTTGCGCGTGAATTTGAAGGCTC..... 1 23
.....TTTTGCGCGTGAATTTGAAGGC..... 863 21
.....TTTTGCGCGTGAATTTGAAGG..... 52 20
.....TTTTGCGCGTGAATTTGAAGGCT..... 8 22
.....TTTTGCGCGTGAATTTGAAG..... 61 19
.....TTGCGCGTGAATTTGAAGCT..... 1093 21
.....TTGCGCGTGAATTTGAAGC..... 28 20
.....TTGCGCGTGAATTTGAAGCTCCC..... 2 24
.....TTGCGCGTGAATTTGAAGG..... 24 19
.....TTGCGCGTGAATTTGAAGCTCC..... 4 23
.....TTGCGCGTGAATTTGAAGGCTC..... 12 22
.....TGCGCGTGAATTTGAAGGCT..... 14 20
.....TGCGCGTGAATTTGAAGGC..... 1 19
.....TGCGCGTGAATTTGAAGCTCC..... 2 22
.....GCGCGTGAATTTGAAGCT..... 3 19
.....CGCGTGAATTTGAAGCTCC..... 1 20
.....CGTGAATTTGAAGGCTCCCA..... 1 21
.....CGTGAATTTGAAGGCTCCC..... 1 20
.....CGTGAATTTGAAGGCTCCCA..... 1 20
.....CGTGAATTTGAAGGCTCCCAT..... 2 21
.....CGTGAATTTGAAGGCTCCC..... 1 19
.....AATTTGAAGGCTCCCATTCGTT..... 1 22

```

```

>ppt-miR1046-3p_MIMAT0005160_Physcomitrella_patens_miR1046-3p
TGGATTCATATTTTTCACGTCAGAAATCTCACAGTACAATTAAGTCATGAAATCTTGTGTGAAAAATGAAAAATCCACGCTGTAATTTGAAAGCGCTTGCCCTTTTGACAACTGCACAGTCTCATGTTGC
*****TGTGAAAAATGAAAAATC*****
TGGATTCATATTTTTCACG..... ppt-miR1046-3p 21
TGGATTCATATTTTTCAC..... 4 20
.....GTGTGAAAAATGAAAAAT..... 1 19
.....TGTGAAAAATGAAAAATCC..... 1 21
.....TGTGAAAAATGAAAAATCCA..... 1 22
.....TGAATAATGAAAAATCCAG..... 1 23
.....TGAATAATGAAAAATCCAGT..... 2 22
.....TGAATAATGAAAAATCCAGT..... 1 22

```

```

>ppt-miR1048-3p_MIMAT0005164_Physcomitrella_patens_miR1048-3p
AGTGTAGACACTATGTGCTGCAACTGCGCATCGGAGTTATATCCAACACATATGTTGCTACACTCATGTTAGACTTTAGACAAATAGCAGCTGTTACTGAGTTACAATTTGAGACTTTGAGACAAATAACA
*****TGCTACACTCATGTTCTAGA*****
.....ATATGTTGCTACACTCATGTT..... ppt-miR1048-3p 21
.....TGCTACACTCATGTTCTAGA..... 1 23
.....TGCTACACTCATGTTCTAGA..... 23 21

```



```

>ppt-miR1055_MIMAT0005173_Physcomitrella_patens_miR1055
ACACCCCTGAATCAGTACCATACATATTATTGATATCAAGGTGAACAAATTTGTGATTTAGGGGTGTTTTCCAGTGACTGCTGTAGATGCTTACATCTGTGTCTAGAGAGTGGGGTGGCGGGGGTTAGTGT
*****TTAGGGGTGTTTTCCAGTGACT*****
.....TTAGGGGTGTTTTCCAGTGA.....
.....TTAGGGGTGTTTTCCAGTGACT.....
.....TAGGGGTGTTTTCCAGTGACT.....
.....GGGGTGTTCAGTGACT.....
.....GTTTTCCAGTGACTGCTGTAGA.....
ppt-miR1055 22
1 20
8 22
1 21
1 19
1 23

>ppt-miR1063c_MIMAT0005184_Physcomitrella_patens_miR1063c
GGCTTCTCCCTGTAGTACAGAAATTTGTACCAAGATTTGCCGTGGCCACTTTCATCTGGAGTACTGATCTTACACCGTCCGTTTTCAAATCTGAATCACTGAAGCTGGGCTAGATTTAAGG
*****CATCTTGGAGTACTGATCTT*****
.....CATCTTGGAGTACTGATCTT.....
.....CATCTTGGAGTACTGATCTT.....
.....CATCTTGGAGTACTGATCTTCACA.....
.....CATCTTGGAGTACTGATCTTCA.....
.....ATCTTGGAGTACTGATCTTCA.....
.....ATCTTGGAGTACTGATCTTCACA.....
ppt-miR1063c 21
2 20
15 21
1 25
3 22
1 22
1 24

>ppt-miR1063e_MIMAT0005186_Physcomitrella_patens_miR1063e
CTCCGGAATGAACTGGTCCGACAGAAACCCGATGCTGCTTGGTCCACTCATCTGGAGTACTGATCTTACATCTGTAGCCTTCACTAAGTCTCAGGAGCACTAGTGTAGTTTCAGCGGAAT
*****CATCTTGGAGTACTGATCTT*****
.....CATCTTGGAGTACTGATCTT.....
.....CATCTTGGAGTACTGATCTT.....
.....CATCTTGGAGTACTGATCTTCACA.....
.....CATCTTGGAGTACTGATCTTCA.....
.....ATCTTGGAGTACTGATCTTCA.....
.....ATCTTGGAGTACTGATCTTCACA.....
ppt-miR1063e 21
2 20
15 21
1 25
3 22
1 22
1 24

>ppt-miR1063f_MIMAT0005187_Physcomitrella_patens_miR1063f
CGAGGTGTCACCTTGGGTGCGAAGCGTTGGGGTTTTAAGCTCTGCTCACTTACATCTGGAGTACTGATCTTACATCTGTAGATTTTCTATCTGTGTGATATCCCGGAATTTGAATCAGTACATA
*****CATCTTGGAGTACTGATCTT*****
.....TTACATCTTGGAGTACTGATCTT.....
.....CATCTTGGAGTACTGATCTT.....
.....CATCTTGGAGTACTGATCTT.....
.....CATCTTGGAGTACTGATCTTCACA.....
.....CATCTTGGAGTACTGATCTTCA.....
.....ATCTTGGAGTACTGATCTTCA.....
.....ATCTTGGAGTACTGATCTTCACA.....
ppt-miR1063f 21
1 22
2 20
15 21
1 25
3 22
1 22
1 24

>ppt-miR1063g_MIMAT0005188_Physcomitrella_patens_miR1063g
TCATCGCATCAAGTTACAGCACATCCAAGACTGCGGCTTGTGCTCACCTCATCTGGAGTACTGATCTTACATCTGGGTTTCACAATCTGCCTCAGGTTGTTAAAGTCCCGGAGTAAATTTGTGT
*****CATCTTGGAGTACTGATCTT*****
.....CATCTTGGAGTACTGATCTT.....
.....CATCTTGGAGTACTGATCTT.....
.....CATCTTGGAGTACTGATCTTCACA.....
.....CATCTTGGAGTACTGATCTTCA.....
.....ATCTTGGAGTACTGATCTTCA.....
.....ATCTTGGAGTACTGATCTTCACA.....
ppt-miR1063g 21
2 20
15 21
1 25
3 22
1 22
1 24

>ppt-miR1066_MIMAT0005193_Physcomitrella_patens_miR1066
GTCCGAGCATCGGTTACCACTGATCCCGCTCAGTAACTGTGCGAATTTATCGCACATGTTGAGAGCGGGTACAAGTGGCGGCTACTGCTACGATTGCAGTTTACACGCGTGACGGTTTGTGAGT
*****ACATGTTGAGAGCGGGTAC*****
.....GTTTACCACCTGATACCCCGCT.....
.....ACCCCGTCAAGTAACTGTGCGAA.....
.....GCACATGTTGAGAGCGGGTAC.....
.....ACATGTTGAGAGCGGGTAC.....
.....TGTTGAGAGCGGGTACAA.....
.....CGGGTACAAGTGGTGGCCG.....
.....CGGGTACAAGTGGTGGCCG.....
ppt-miR1066 21
1 21
1 24
1 23
3 21
1 20
1 20
3 21

>ppt-miR1070_MIMAT0005198_Physcomitrella_patens_miR1070
GGTCAACAGAGAGGTCAAGCGCATCAACTCTTGACCACTTTCTCTGTGCTCGTTGTATCGGTTCTAGTAAACTGCTGAAAATTTCAACAAGTTTACGAGCAACCGATCAACGAAGCAACCGACTGATTGT
*****TCGGTTTCTAGTAAACTGCT*****
.....TCGGTTTCTAGTAAACTGCT.....
.....GCAACCGATCAACGAAGCAA.....
ppt-miR1070 21
1 23
1 21

>ppt-miR1072_MIMAT0005201_Physcomitrella_patens_miR1072
AAAAATATCTTTAAATTTAAATCCCAATAAAAATGACAAACAATTTTATGATTGCATTTGTTATTTGAAGCTGAAAATAGGCCATCTTAAATAGAACTAATTTCTTTGAAATAAGATATCCGGTATGCC
*****TGCATTTGTTATTTGAAGCTGA*****
.....TGCATTTGTTATTTGAAGCTGA.....
.....GCATTTGTTATTTGAAGCTGA.....
.....AAATAGGCCATCTTAAATAGAAC.....
ppt-miR1072 24
1 24
1 23
1 26

>ppt-miR1073-5p_MIMAT0005202_Physcomitrella_patens_miR1073-5p
GGATGTAGTGTGAACTGAGCAGCATAGCAGACTGATTTAACGTGGAAGAATGAACACATGAATGATATTAACGTCCACGATGAAATCTAATGAGCAATGTTGCTGGGATTAACCTCAGTTTCAGACACAAGTTAAT
*****TGAATGATATTAACGTCCAC*****
.....CATGAATGATATTAACGTCCA.....
.....TGAATGATATTAACGTCCACGA.....
.....TGAATGATATTAACGTCCACGAT.....
.....TGAATGATATTAACGTCCAC.....
.....TGAATGATATTAACGTCCACG.....
.....TGAATGATATTAACGTCCA.....
.....GAATGATATTAACGTCCACG.....
.....GAATGATATTAACGTCCACGA.....
.....AATGATATTAACGTCCACG.....
.....ATGATATTAACGTCCACGA.....
ppt-miR1073-5p 21
1 21
267 22
2 23
24 20
836 21
9 19
9 20
7 21
6 19
2 19

>ppt-miR1074_MIMAT0005204_Physcomitrella_patens_miR1074
ATTTATCTGACTGGCCGCAATGTTCTTGAAGTTCAGGTTTTGCTGATTTGGTTCAGGTTGTAGTTGTGTGATGGTAAATTTCAATAACAAACATCAACCTCAACACAACGAACCACTGACCAACA
*****AGGTTGTTAGTTGTGTTGAT*****
.....TTGTTGTCAGGTTGTGTTGAT.....
.....TGGTCAAGGTTGTGTTGTTG.....
ppt-miR1074 21
5 21
2 21

```

```

.....GGTCAGGTTGTTAGTTGTTG..... 1 21
.....TCAGGTTGTTAGTTGTTGTTG..... 1 21
.....CAGGTTGTTAGTTGTTGTTGA..... 6 21
.....AGGTTGTTAGTTGTTGTTGATG..... 2 22
.....AGGTTGTTAGTTGTTGTTAGG..... 1 23
.....AGGTTGTTAGTTGTTGTTGA..... 36 20
.....AGGTTGTTAGTTGTTGTTGAT..... 49 21
.....TTGTTAGTTGTTGTTGATGGGT..... 1 21
.....ATCAACAACGAACAACCCCTGA..... 1 23
.....TCAACAACAACGAACAACCCCTGA..... 1 22
.....CAACAACAACGAACAACCCCTGA..... 7 21
.....CAACAACAACGAACAACCCCT..... 1 19
.....AACACAACGAACAACCCCTGA..... 5 20
.....AACACAACGAACAACCCCTGAC..... 13 21
.....ACAACAACGAACAACCCCTGACCA..... 1 21

```

```

>ppt-miR1078_MIMAT0005210_Physcomitrella_patens_miR1078
GTGTTGAAAAATTGCTTCTCAAACTTTACAACAACAAAACAAATACCTTGATGCTTTTGGATGATTCAATTGTGATAAAAAGTGTATACAATTGAATTCTAAATATCTCAATGTTTATTACAACT
*****TTTGGATGATTCAATTGTGA***** ppt-miR1078 21
.....TTTGGATGATTCAATTGTGA..... 21 20
.....TTTGGATGATTCAATTGTGATAA..... 5 24
.....TTTGGATGATTCAATTGTGAT..... 141 21
.....TTGGATGATTCAATTGTGAT..... 1 23
.....TGGATGATTCAATTGTGATAA..... 1 22
.....TGGATGATTCAATTGTGATAA..... 1 21
.....TATCACAATTGAATTATCTAAATA..... 1 24

```

```

>ppt-miR2084_MIMAT0010018_Physcomitrella_patens_miR2084
CTATACCAACTTGAGAAATTAAGTAGCAGTTACAAGTATCTTGAATTCGTGGAAGCGCCTGCATTGTTGGATTGGACTACAACGGAGGATAGCCCAATCCATCGAAGCAGGCGCTTCAACGACTTTCAGATTT
*****CCTGCATTGTTGGATTGGA***** ppt-miR2084 21
.....GCCCTGCATTGTTGGATTGT..... 1 21
.....GCCTGCATTGTTGGATTGGACT..... 1 24
.....GCCTGCATTGTTGGATTGT..... 1 19
.....CCTGCATTGTTGGATTGGACT..... 5 23
.....CCTGCATTGTTGGATTGGACT..... 3 22
.....CCTGCATTGTTGGATTGGGA..... 13 21
.....CTGCATTGTTGGATTGGACT..... 1 22
.....TGCATTGTTGGATTGGACT..... 1 21
.....AATCCATCGAAGCAGGCGCTT..... 1 21

```

```

>ppt-miR2082_MIMAT0010021_Physcomitrella_patens_miR2082
GCTTGAGTAGTGAGGAAGCAGGCTTGGCTGACTCGTCCACATCTGCCGCTCCAGATTGTGTTCCGCTTCTTCTTGTGATGATGCTCCACAGATCAAGCATGATAGAAGAAGGCGCTTACGCAATCTG
*****TGTGTTCCGCTTCTTCTT***** ppt-miR2082 21
.....TGTGTTCCGCTTCTTCTT..... 33 21
.....GTGTTCCGCTTCTTCTT..... 1 21
.....AGAAGAAGGCGCTTACGCAA..... 1 23
.....AGAAGAAGGCGCTTACGCAAT..... 38 21
.....AGAAGAAGGCGCTTACGCAA..... 2 19
.....AGAAGAAGGCGCTTACGCAA..... 2 20
.....AGAAGAAGGCGCTTACGCAATCT..... 1 23

```

Table S1. Total small RNA reads from the new MIR sites

| miRNAs       | 18–22nt | 23–26 nt | % of 23–26nt reads |
|--------------|---------|----------|--------------------|
| miR2883      | 65      | 5        | 7.14%              |
| miR2328      | 40      | 1        | 2.44%              |
| miR2831      | 15      | 9        | 37.50%             |
| miR2812      | 21      | 43       | 67.19%             |
| miR2010      | 17      | 2        | 10.53%             |
| miR2011      | 1       | 6        | 85.71%             |
| miR2012      | 173     | 40       | 18.78%             |
| miR2012_star | 21      | 9        | 30.00%             |
| miR2014      | 36      | 60       | 62.50%             |
| miR2018      | 40      | 0        | 0.00%              |
| miR2022      | 32      | 0        | 0.00%              |

Table S2. The 23-26 reads from new MIRs and known MIRs that found in AGO-immunoprecipitated small RNA libraries

|                             | AG01 | AG02 | AG04        | AG05 | AG07       |
|-----------------------------|------|------|-------------|------|------------|
| <b>New miRNA candidates</b> |      |      |             |      |            |
| cand2883                    |      |      | 1           |      |            |
| cand2831-3p                 |      |      | 5           |      |            |
| cand2812                    |      |      | 2           |      | 7          |
| cand2010                    |      |      | 1           |      |            |
| cand2012                    |      |      | 4           |      |            |
| cand2012_star               |      |      | 2           |      |            |
| cand2014                    |      |      | 50          |      |            |
| <b>Total %</b>              |      |      | <b>100%</b> |      | <b>14%</b> |
| <b>Known miRNAs</b>         |      |      |             |      |            |
| ath-miR156a                 |      |      | 36          |      |            |
| ath-miR156b                 |      |      | 36          |      |            |
| ath-miR156c                 |      |      | 36          |      |            |
| ath-miR157c                 | 240  |      | 240         |      |            |
| ath-miR158a                 |      |      | 9           |      |            |
| ath-miR161.2                | 219  |      | 276         | 90   |            |
| ath-miR161.1                | 219  |      | 276         | 90   |            |
| ath-miR163                  | 717  | 286  | 1249        | 376  | 400        |
| ath-miR164a                 | 1    |      | 1           |      |            |
| ath-miR164b                 | 10   |      | 10          |      |            |
| ath-miR165a                 |      |      | 4           |      | 4          |
| ath-miR166a                 |      |      | 36          | 9    | 25         |
| ath-miR166b                 |      |      | 25          | 1    | 25         |
| ath-miR166c                 |      |      | 1           |      | 1          |
| ath-miR166d                 |      |      | 25          |      | 25         |
| ath-miR166e                 |      |      | 3           | 1    | 1          |
| ath-miR166f                 |      |      | 1           |      | 1          |
| ath-miR166g                 |      |      | 1           |      | 1          |
| ath-miR167a                 | 6    |      | 4           |      |            |
| ath-miR167b                 | 313  |      | 303         |      |            |
| ath-miR168a                 | 498  |      | 514         | 90   | 208        |
| ath-miR168b                 | 44   |      | 64          | 8    | 20         |
| ath-miR169a                 | 1    |      |             |      | 3          |
| ath-miR172a                 | 1    |      | 2           |      | 1          |
| ath-miR172b                 | 1    |      | 4           |      | 1          |
| ath-miR173                  | 25   |      | 21          |      |            |
| ath-miR167d                 | 34   |      | 17          |      |            |
| ath-miR169h                 | 3    |      |             |      |            |

Table S2. The 23-26 reads from new MIRs and known MIRs that found in AGO-immunoprecipitated small RNA libraries

|                |            |           |            |            |            |
|----------------|------------|-----------|------------|------------|------------|
| ath-miR169i    | 4          |           |            |            | 6          |
| ath-miR169j    | 2          |           |            |            | 4          |
| ath-miR169k    | 3          |           |            |            |            |
| ath-miR169l    | 2          |           |            |            | 4          |
| ath-miR169m    | 3          |           |            |            | 1          |
| ath-miR169n    | 2          |           |            |            | 4          |
| ath-miR171b    |            |           | 1          |            |            |
| ath-miR171c    |            |           | 1          |            |            |
| ath-miR390a    |            |           | 12         |            |            |
| ath-miR390b    |            |           | 12         |            |            |
| ath-miR391     | 60         |           | 932        |            |            |
| ath-miR396a    |            |           | 8          |            | 4          |
| ath-miR172e    |            |           | 2          |            |            |
| ath-miR447a    | 3          |           |            |            |            |
| ath-miR447b    | 3          |           |            |            |            |
| ath-miR775     | 937        |           | 937        | 1408       | 466        |
| ath-miR829.1   |            |           | 8          |            | 8          |
| ath-miR840     |            |           | 1          |            |            |
| ath-miR843     |            |           | 1          |            |            |
| ath-miR848     | 19         |           |            |            |            |
| ath-miR850     |            |           | 1          |            |            |
| ath-miR852     |            |           | 9          |            |            |
| ath-miR863-3p  | 2          |           | 21         |            |            |
| <b>Total %</b> | <b>55%</b> | <b>2%</b> | <b>78%</b> | <b>18%</b> | <b>43%</b> |

Table S3: Small RNA reads from canonical MIRs in our small RNA dataset

| miRNAs       | 20-22nt | 23-26 nt | % of 23-26nt reads |
|--------------|---------|----------|--------------------|
| ath-miR156a  | 34828   | 15       | 0.04%              |
| ath-miR156b  | 34827   | 15       | 0.04%              |
| ath-miR156c  | 34828   | 15       | 0.04%              |
| ath-miR156d  | 67667   | 6        | 0.01%              |
| ath-miR157a  | 153334  | 24       | 0.02%              |
| ath-miR157b  | 153333  | 16       | 0.01%              |
| ath-miR157c  | 154514  | 250      | 0.16%              |
| ath-miR157d  | 13969   | 7        | 0.05%              |
| ath-miR158a  | 101478  | 11       | 0.01%              |
| ath-miR160a  | 6562    | 5        | 0.08%              |
| ath-miR160c  | 5078    | 13       | 0.26%              |
| ath-miR161.2 | 122023  | 196      | 0.16%              |
| ath-miR161.1 | 122023  | 196      | 0.16%              |
| ath-miR163   | 1204    | 294      | 19.63%             |
| ath-miR164a  | 15292   | 1        | 0.01%              |
| ath-miR164b  | 15318   | 10       | 0.07%              |
| ath-miR165a  | 5180    | 4        | 0.08%              |
| ath-miR166a  | 67237   | 39       | 0.06%              |
| ath-miR166b  | 63656   | 27       | 0.04%              |
| ath-miR166c  | 63659   | 1        | 0.00%              |
| ath-miR166d  | 63660   | 25       | 0.04%              |
| ath-miR166e  | 63731   | 8        | 0.01%              |
| ath-miR166f  | 63729   | 1        | 0.00%              |
| ath-miR166g  | 63734   | 1        | 0.00%              |
| ath-miR167a  | 412062  | 4        | 0.00%              |
| ath-miR167b  | 412308  | 305      | 0.07%              |
| ath-miR168a  | 107511  | 147      | 0.14%              |
| ath-miR168b  | 107455  | 27       | 0.03%              |
| ath-miR169a  | 14156   | 10       | 0.07%              |
| ath-miR172a  | 44326   | 2        | 0.00%              |
| ath-miR172b  | 44319   | 3        | 0.01%              |
| ath-miR173   | 5764    | 28       | 0.48%              |
| ath-miR167d  | 8086    | 19       | 0.23%              |
| ath-miR169c  | 986     | 3        | 0.30%              |
| ath-miR169d  | 1948    | 1        | 0.05%              |
| ath-miR169e  | 1732    | 1        | 0.06%              |
| ath-miR169f  | 1412    | 8        | 0.56%              |
| ath-miR169g  | 1297    | 2        | 0.15%              |
| ath-miR169h  | 5222    | 3        | 0.06%              |
| ath-miR169i  | 6312    | 11       | 0.17%              |
| ath-miR169j  | 6300    | 7        | 0.11%              |

|                |       |     |         |
|----------------|-------|-----|---------|
| ath-miR169k    | 5227  | 3   | 0.06%   |
| ath-miR169l    | 6289  | 7   | 0.11%   |
| ath-miR169m    | 5385  | 6   | 0.11%   |
| ath-miR169n    | 6306  | 8   | 0.13%   |
| ath-miR171b    | 978   | 1   | 0.10%   |
| ath-miR171c    | 1026  | 1   | 0.10%   |
| ath-miR172d    | 949   | 5   | 0.52%   |
| ath-miR390a    | 6090  | 13  | 0.21%   |
| ath-miR390b    | 5978  | 14  | 0.23%   |
| ath-miR391     | 38455 | 544 | 1.39%   |
| ath-miR393a    | 467   | 2   | 0.43%   |
| ath-miR393b    | 465   | 4   | 0.85%   |
| ath-miR396a    | 4981  | 7   | 0.14%   |
| ath-miR396b    | 418   | 1   | 0.24%   |
| ath-miR400     | 3347  | 13  | 0.39%   |
| ath-miR402     | 52    | 3   | 5.45%   |
| ath-miR403     | 1569  | 12  | 0.76%   |
| ath-miR406     | 1     | 4   | 80.00%  |
| ath-miR407     | 1     | 3   | 75.00%  |
| ath-miR408     | 368   | 4   | 1.08%   |
| ath-miR172e    | 184   | 1   | 0.54%   |
| ath-miR447a    | 158   | 5   | 3.07%   |
| ath-miR447b    | 156   | 5   | 3.11%   |
| ath-miR472     | 392   | 1   | 0.25%   |
| ath-miR775     | 2439  | 478 | 16.39%  |
| ath-miR777     | 105   | 5   | 4.55%   |
| ath-miR829.1   | 0     | 15  | 100.00% |
| ath-miR840     | 26    | 1   | 3.70%   |
| ath-miR843     | 1153  | 1   | 0.09%   |
| ath-miR848     | 77    | 24  | 23.76%  |
| ath-miR850     | 404   | 19  | 4.49%   |
| ath-miR852     | 165   | 5   | 2.94%   |
| ath-miR860     | 62    | 7   | 10.14%  |
| ath-miR861-3p  | 8     | 4   | 33.33%  |
| ath-miR863-5p  | 106   | 9   | 7.83%   |
| ath-miR863-3p  | 1781  | 113 | 5.97%   |
| ath-miR865-5p  | 21    | 4   | 16.00%  |
| ath-miR866-5p  | 38    | 1   | 2.56%   |
| ath-miR1888    | 70    | 1   | 1.41%   |
| ath-miR2112-5p | 100   | 1   | 0.99%   |

Table S4. The reads of small RNAs from known MIRs in Rice dataset GSM361264

| miRNAs        | 20-22nt | 23-26 nt | % of 23-26nt reads |
|---------------|---------|----------|--------------------|
| osa-miR156d   | 518916  | 4        | 0.00%              |
| osa-miR156f   | 517428  | 3        | 0.00%              |
| osa-miR156g   | 165909  | 3        | 0.00%              |
| osa-miR162a   | 571     | 1        | 0.17%              |
| osa-miR166a   | 34834   | 1        | 0.00%              |
| osa-miR166b   | 34799   | 1        | 0.00%              |
| osa-miR166c   | 47980   | 2        | 0.00%              |
| osa-miR166d   | 34834   | 1        | 0.00%              |
| osa-miR167b   | 259464  | 1        | 0.00%              |
| osa-miR169a   | 258     | 211      | 44.99%             |
| osa-miR395i   | 8       | 1        | 11.11%             |
| osa-miR397a   | 2685    | 4        | 0.15%              |
| osa-miR397b   | 3274    | 1        | 0.03%              |
| osa-miR159a.2 | 3834    | 1        | 0.03%              |
| osa-miR164e   | 245     | 1        | 0.41%              |
| osa-miR166k   | 2659    | 1        | 0.04%              |
| osa-miR166l   | 2672    | 2        | 0.07%              |
| osa-miR167d   | 724905  | 1622     | 0.22%              |
| osa-miR167e   | 12332   | 3        | 0.02%              |
| osa-miR167f   | 724883  | 790      | 0.11%              |
| osa-miR167g   | 724944  | 24592    | 3.28%              |
| osa-miR167h   | 724881  | 779      | 0.11%              |
| osa-miR167i   | 12344   | 4        | 0.03%              |
| osa-miR168a   | 668973  | 146      | 0.02%              |
| osa-miR169h   | 38      | 4        | 9.52%              |
| osa-miR169i   | 38      | 4        | 9.52%              |
| osa-miR169j   | 38      | 4        | 9.52%              |
| osa-miR169k   | 38      | 3        | 7.32%              |
| osa-miR169l   | 38      | 3        | 7.32%              |
| osa-miR169m   | 38      | 2        | 5.00%              |
| osa-miR171d   | 210     | 1        | 0.47%              |
| osa-miR171e   | 210     | 1        | 0.47%              |
| osa-miR393b   | 260     | 4        | 1.52%              |
| osa-miR167j   | 724900  | 1626     | 0.22%              |
| osa-miR166m   | 1068    | 4        | 0.37%              |
| osa-miR435    | 109     | 6        | 5.22%              |
| osa-miR437    | 2       | 7        | 77.78%             |
| osa-miR439a   | 7       | 65       | 90.28%             |
| osa-miR439b   | 1       | 8        | 88.89%             |
| osa-miR439c   | 7       | 62       | 89.86%             |
| osa-miR439d   | 6       | 63       | 91.30%             |



|               |        |     |         |
|---------------|--------|-----|---------|
| osa-miR439e   | 7      | 65  | 90.28%  |
| osa-miR439f   | 7      | 65  | 90.28%  |
| osa-miR439g   | 7      | 65  | 90.28%  |
| osa-miR439h   | 7      | 65  | 90.28%  |
| osa-miR440    | 25     | 11  | 30.56%  |
| osa-miR441a   | 3      | 3   | 50.00%  |
| osa-miR441b   | 1      | 2   | 66.67%  |
| osa-miR441c   | 4      | 3   | 42.86%  |
| osa-miR442    | 13     | 74  | 85.06%  |
| osa-miR445a   | 5      | 13  | 72.22%  |
| osa-miR528    | 122921 | 38  | 0.03%   |
| osa-miR530-5p | 1347   | 9   | 0.66%   |
| osa-miR530-3p | 1184   | 209 | 15.00%  |
| osa-miR535    | 28991  | 1   | 0.00%   |
| osa-miR395p   | 9      | 2   | 18.18%  |
| osa-miR395w   | 0      | 1   | 100.00% |
| osa-miR806a   | 120    | 435 | 78.38%  |
| osa-miR806b   | 94     | 40  | 29.85%  |
| osa-miR806c   | 94     | 414 | 81.50%  |
| osa-miR806d   | 120    | 446 | 78.80%  |
| osa-miR806e   | 89     | 276 | 75.62%  |
| osa-miR806f   | 82     | 253 | 75.52%  |
| osa-miR806g   | 119    | 433 | 78.44%  |
| osa-miR806h   | 94     | 415 | 81.53%  |
| osa-miR807c   | 1      | 1   | 50.00%  |
| osa-miR808    | 128    | 1   | 0.78%   |
| osa-miR809a   | 9      | 9   | 50.00%  |
| osa-miR809b   | 9      | 9   | 50.00%  |
| osa-miR809c   | 8      | 8   | 50.00%  |
| osa-miR809d   | 10     | 18  | 64.29%  |
| osa-miR809e   | 1      | 1   | 50.00%  |
| osa-miR809f   | 1      | 1   | 50.00%  |
| osa-miR809g   | 8      | 7   | 46.67%  |
| osa-miR809h   | 1      | 1   | 50.00%  |
| osa-miR811a   | 14     | 24  | 63.16%  |
| osa-miR811b   | 14     | 24  | 63.16%  |
| osa-miR812a   | 38     | 76  | 66.67%  |
| osa-miR812b   | 31     | 42  | 57.53%  |
| osa-miR812c   | 19     | 84  | 81.55%  |
| osa-miR812d   | 28     | 36  | 56.25%  |
| osa-miR812e   | 76     | 108 | 58.70%  |
| osa-miR813    | 1      | 3   | 75.00%  |
| osa-miR814a   | 0      | 1   | 100.00% |

|                 |      |      |         |
|-----------------|------|------|---------|
| osa-miR814b     | 0    | 2    | 100.00% |
| osa-miR815a     | 36   | 196  | 84.48%  |
| osa-miR815b     | 95   | 483  | 83.56%  |
| osa-miR815c     | 165  | 1262 | 88.44%  |
| osa-miR816      | 1    | 1    | 50.00%  |
| osa-miR818a     | 0    | 15   | 100.00% |
| osa-miR818b     | 33   | 71   | 68.27%  |
| osa-miR818c     | 1    | 16   | 94.12%  |
| osa-miR818d     | 75   | 145  | 65.91%  |
| osa-miR818e     | 8    | 40   | 83.33%  |
| osa-miR819a     | 69   | 168  | 70.89%  |
| osa-miR819b     | 19   | 112  | 85.50%  |
| osa-miR819c     | 69   | 168  | 70.89%  |
| osa-miR819d     | 69   | 168  | 70.89%  |
| osa-miR819e     | 69   | 168  | 70.89%  |
| osa-miR819f     | 69   | 167  | 70.76%  |
| osa-miR819g     | 70   | 167  | 70.46%  |
| osa-miR819h     | 69   | 167  | 70.76%  |
| osa-miR819i     | 21   | 47   | 69.12%  |
| osa-miR819j     | 30   | 60   | 66.67%  |
| osa-miR819k     | 55   | 96   | 63.58%  |
| osa-miR820a     | 50   | 3647 | 98.65%  |
| osa-miR820b     | 50   | 3647 | 98.65%  |
| osa-miR820c     | 50   | 3647 | 98.65%  |
| osa-miR1425     | 1094 | 24   | 2.15%   |
| osa-miR1427     | 72   | 14   | 16.28%  |
| osa-miR1429-5p  | 0    | 1    | 100.00% |
| osa-miR810b.1   | 111  | 7    | 5.93%   |
| osa-miR1436     | 9    | 1    | 10.00%  |
| osa-miR1437     | 2    | 3    | 60.00%  |
| osa-miR1441     | 13   | 17   | 56.67%  |
| osa-miR1442     | 1    | 2    | 66.67%  |
| osa-miR1846d-5p | 13   | 1    | 7.14%   |
| osa-miR1847.1   | 5    | 1    | 16.67%  |
| osa-miR1849     | 23   | 10   | 30.30%  |
| osa-miR1846a-5p | 3    | 1    | 25.00%  |
| osa-miR1846b-5p | 3    | 1    | 25.00%  |
| osa-miR1860-3p  | 1    | 2    | 66.67%  |
| osa-miR1884a    | 22   | 4    | 15.38%  |
| osa-miR1861d    | 0    | 1    | 100.00% |
| osa-miR1861h    | 0    | 1    | 100.00% |
| osa-miR1861i    | 0    | 1    | 100.00% |
| osa-miR1861j    | 0    | 1    | 100.00% |

|                |       |      |         |
|----------------|-------|------|---------|
| osa-miR18611   | 0     | 1    | 100.00% |
| osa-miR1862a   | 68    | 13   | 16.05%  |
| osa-miR1862b   | 65    | 11   | 14.47%  |
| osa-miR1862c   | 76    | 11   | 12.64%  |
| osa-miR1863    | 39    | 496  | 92.71%  |
| osa-miR1864    | 7     | 18   | 72.00%  |
| osa-miR1865-5p | 2     | 37   | 94.87%  |
| osa-miR1867    | 14    | 129  | 90.21%  |
| osa-miR1868    | 15    | 274  | 94.81%  |
| osa-miR812f    | 2     | 34   | 94.44%  |
| osa-miR1869    | 5     | 1    | 16.67%  |
| osa-miR1870    | 117   | 2421 | 95.39%  |
| osa-miR1871    | 0     | 11   | 100.00% |
| osa-miR1872    | 1     | 10   | 90.91%  |
| osa-miR1873    | 6     | 24   | 80.00%  |
| osa-miR1874-3p | 0     | 2    | 100.00% |
| osa-miR1875    | 56    | 34   | 37.78%  |
| osa-miR1862d   | 70    | 858  | 92.46%  |
| osa-miR1876    | 1     | 80   | 98.77%  |
| osa-miR1884b   | 3     | 18   | 85.71%  |
| osa-miR1862e   | 71    | 729  | 91.13%  |
| osa-miR1878    | 1     | 23   | 95.83%  |
| osa-miR1879    | 32    | 26   | 44.83%  |
| osa-miR1880    | 2     | 7    | 77.78%  |
| osa-miR1881    | 2     | 16   | 88.89%  |
| osa-miR812g    | 11    | 121  | 91.67%  |
| osa-miR812h    | 16    | 153  | 90.53%  |
| osa-miR812i    | 13    | 147  | 91.88%  |
| osa-miR812j    | 11    | 153  | 93.29%  |
| osa-miR1318    | 59600 | 252  | 0.42%   |
| osa-miR1319    | 1     | 1    | 50.00%  |
| osa-miR1320    | 718   | 8    | 1.10%   |
| osa-miR1846e   | 280   | 40   | 12.50%  |
| osa-miR2098-3p | 0     | 1    | 100.00% |
| osa-miR2121a   | 16    | 47   | 74.60%  |
| osa-miR2121b   | 16    | 43   | 72.88%  |
| osa-miR2123a   | 82    | 253  | 75.52%  |
| osa-miR2123b   | 54    | 184  | 77.31%  |
| osa-miR2123c   | 118   | 302  | 71.90%  |
| osa-miR2124a   | 1     | 2    | 66.67%  |
| osa-miR2124b   | 1     | 4    | 80.00%  |
| osa-miR2124c   | 1     | 2    | 66.67%  |
| osa-miR2124d   | 1     | 2    | 66.67%  |

|              |   |   |         |
|--------------|---|---|---------|
| osa-miR2124e | 1 | 2 | 66.67%  |
| osa-miR2124f | 1 | 5 | 83.33%  |
| osa-miR2124g | 1 | 2 | 66.67%  |
| osa-miR2124i | 1 | 2 | 66.67%  |
| osa-miR2125  | 0 | 4 | 100.00% |
| osa-miR2124h | 1 | 2 | 66.67%  |

Table S5. The reads of small RNAs from known MIRs in Moss Dataset GSM313212

| miRNAs         | 20-22nt | 23-26 nt | % of 23-26nt reads |
|----------------|---------|----------|--------------------|
| ppt-miR390b    | 285     | 1        | 0.35%              |
| ppt-miR319a    | 927     | 2        | 0.22%              |
| ppt-miR319b    | 537     | 1        | 0.19%              |
| ppt-miR319c    | 1679    | 4        | 0.24%              |
| ppt-miR319d    | 1740    | 1        | 0.06%              |
| ppt-miR533a    | 405     | 2        | 0.49%              |
| ppt-miR534a    | 3125    | 94       | 2.92%              |
| ppt-miR536a    | 41177   | 317      | 0.76%              |
| ppt-miR537a    | 36      | 1        | 2.70%              |
| ppt-miR537b    | 510     | 3        | 0.58%              |
| ppt-miR538a    | 1054    | 17       | 1.59%              |
| ppt-miR538b    | 1006    | 13       | 1.28%              |
| ppt-miR538c    | 1005    | 13       | 1.28%              |
| ppt-miR1215    | 950     | 3        | 0.31%              |
| ppt-miR1217-5p | 48      | 5        | 9.43%              |
| ppt-miR1217-3p | 964     | 6        | 0.62%              |
| ppt-miR1218    | 989     | 2        | 0.20%              |
| ppt-miR535d    | 1383    | 1        | 0.07%              |
| ppt-miR1221-3p | 122     | 4        | 3.17%              |
| ppt-miR1222a   | 625     | 1        | 0.16%              |
| ppt-miR477c    | 395     | 7        | 1.74%              |
| ppt-miR477f    | 339     | 9        | 2.59%              |
| ppt-miR477g-5p | 339     | 9        | 2.59%              |
| ppt-miR477g-3p | 829     | 77       | 8.50%              |
| ppt-miR894     | 157     | 1        | 0.63%              |
| ppt-miR896     | 398     | 220      | 35.60%             |
| ppt-miR897     | 4       | 8        | 66.67%             |
| ppt-miR900-5p  | 136     | 3        | 2.16%              |
| ppt-miR900-3p  | 91      | 12       | 11.65%             |
| ppt-miR902b-5p | 570     | 3        | 0.52%              |
| ppt-miR536b    | 41176   | 334      | 0.80%              |
| ppt-miR904a    | 9949    | 22       | 0.22%              |
| ppt-miR904b    | 9947    | 22       | 0.22%              |
| ppt-miR898b    | 7039    | 21       | 0.30%              |
| ppt-miR898a    | 7482    | 7        | 0.09%              |
| ppt-miR408b    | 18      | 2        | 10.00%             |
| ppt-miR477d    | 615     | 9        | 1.44%              |
| ppt-miR477e    | 413     | 1        | 0.24%              |
| ppt-miR533c    | 402     | 10       | 2.43%              |

|                 |       |     |         |
|-----------------|-------|-----|---------|
| ppt-miR536d     | 41180 | 327 | 0.79%   |
| ppt-miR536e     | 41180 | 326 | 0.79%   |
| ppt-miR536f     | 107   | 1   | 0.93%   |
| ppt-miR537c     | 510   | 3   | 0.58%   |
| ppt-miR537d     | 32    | 1   | 3.03%   |
| ppt-miR902c-5p  | 554   | 1   | 0.18%   |
| ppt-miR902e-5p  | 565   | 2   | 0.35%   |
| ppt-miR902g-5p  | 565   | 2   | 0.35%   |
| ppt-miR902h-5p  | 312   | 4   | 1.27%   |
| ppt-miR902h-3p  | 17    | 1   | 5.56%   |
| ppt-miR1023a-5p | 1730  | 2   | 0.12%   |
| ppt-miR1023a-3p | 4050  | 8   | 0.20%   |
| ppt-miR1025     | 1250  | 6   | 0.48%   |
| ppt-miR1026b    | 176   | 1   | 0.56%   |
| ppt-miR1027a    | 126   | 3   | 2.33%   |
| ppt-miR1027b    | 126   | 3   | 2.33%   |
| ppt-miR1030a    | 34    | 1   | 2.86%   |
| ppt-miR1030f    | 34    | 1   | 2.86%   |
| ppt-miR1030g    | 34    | 1   | 2.86%   |
| ppt-miR1031a    | 450   | 1   | 0.22%   |
| ppt-miR1031b    | 450   | 1   | 0.22%   |
| ppt-miR1033a    | 291   | 5   | 1.69%   |
| ppt-miR1033b    | 291   | 8   | 2.68%   |
| ppt-miR1033c    | 291   | 8   | 2.68%   |
| ppt-miR1033d    | 291   | 5   | 1.69%   |
| ppt-miR1033e    | 291   | 5   | 1.69%   |
| ppt-miR1038-5p  | 120   | 1   | 0.83%   |
| ppt-miR1039-5p  | 32    | 5   | 13.51%  |
| ppt-miR1043-5p  | 93    | 2   | 2.11%   |
| ppt-miR1043-3p  | 2079  | 8   | 0.38%   |
| ppt-miR1046-3p  | 4     | 2   | 33.33%  |
| ppt-miR1048-3p  | 23    | 1   | 4.17%   |
| ppt-miR1055     | 10    | 1   | 9.09%   |
| ppt-miR1063c    | 21    | 2   | 8.70%   |
| ppt-miR1063e    | 21    | 2   | 8.70%   |
| ppt-miR1063f    | 22    | 2   | 8.33%   |
| ppt-miR1063g    | 21    | 2   | 8.70%   |
| ppt-miR1066     | 8     | 1   | 11.11%  |
| ppt-miR1070     | 0     | 1   | 100.00% |
| ppt-miR1072     | 0     | 2   | 100.00% |
| ppt-miR1073-5p  | 1144  | 2   | 0.17%   |
| ppt-miR1074     | 103   | 1   | 0.96%   |
| ppt-miR1078     | 164   | 6   | 3.53%   |

|             |    |   |        |
|-------------|----|---|--------|
| ppt-miR2084 | 19 | 6 | 24.00% |
|-------------|----|---|--------|
